# Supplementary material for: Pig genome functional annotation enhances biological interpretations of complex traits and comparative epigenomics
Source: Research Square preprint supplement (doi:10.21203/rs.3.rs-253276/v1), 2021-03-22
Supplement: Supplementary file 1 [file 5a51e88a6dfb91857a74d448.xlsx]

## Sheet: Table S1 Data_summary
Table S1 A summary of data quality in all the ChIP-seq of epi-marks, control, ATAC-seq, RRBS and RNA-seq data sets of pig
Assay	Tissue	Rep	Raw Reads	Trimmed	%	Unaligned	%	Filtered	%	Duplicates	%	Remaining	%	Tissue	Replicate	Peaks	Coverage	FRiP	Tissue	Rep	Depth	NRF	PBC1	PBC2	NSC	RSC	JSD	SJSD	IJSD
H3K27ac	Cecum	P348	60118214	10639	0.0176968	359647	0.598339	3411500	5.70982	9615446	17.0679	46720982	77.7152	Cecum	P348	112641	0.0450987	0.4702	Cecum	P348	46720982	0.859902	0.864504	7.56899	1.21468	1.57198	0.417262	0.509299	0.151324
H3K27ac	Cecum	P350	58119227	8348	0.0143636	232279	0.399717	3300397	5.70228	8662962	15.8726	45915241	79.0018	Cecum	P350	109907	0.0429258	0.452	Cecum	P350	45915241	0.871281	0.875533	8.24346	1.21197	1.58687	0.3992	0.500306	0.16013
H3K27ac	Colon	P348	40142139	56013	0.139537	989192	2.46767	3115215	7.96793	7884960	21.9138	28096759	69.9932	Colon	P348	93502	0.0291198	0.4778	Colon	P348	28096759	0.81361	0.813727	5.34879	1.33692	7.68877	0.41609	0.53953	0.216897
H3K27ac	Colon	P350	31176347	782342	2.50941	319906	1.05253	1896606	6.30644	4271790	15.1603	23905703	76.679	Colon	P350	67203	0.0248647	0.3587	Colon	P350	23905703	0.855534	0.857362	7.06812	1.17543	1.86049	0.329048	0.470555	0.224063
H3K27ac	Duodenum	P348	41556184	1580407	3.80306	803602	2.01022	4752861	12.1333	4507997	13.0973	29911317	71.978	Duodenum	P348	53637	0.0136746	0.1828	Duodenum	P348	29911317	0.886031	0.887204	8.92364	1.2449	5.23993	0.203627	0.350222	0.215304
H3K27ac	Duodenum	P350	37948703	19032	0.0501519	2660215	7.01355	4045092	11.4691	5757293	18.4385	25467071	67.1092	Duodenum	P350	55618	0.0166753	0.2236	Duodenum	P350	25467071	0.843905	0.844409	6.42412	1.27164	2.65083	0.238675	0.380191	0.210364
H3K27ac	Ileum	P348	29869501	2880201	9.64262	791833	2.93388	2985418	11.3958	2473931	10.658	20738118	69.4291	Ileum	P348	41692	0.0101754	0.1602	Ileum	P348	20738118	0.905667	0.907186	10.9119	1.2646	6.88671	0.200433	0.348511	0.215121
H3K27ac	Ileum	P350	39242839	30163	0.0768624	2817743	7.1858	3138388	8.62315	6673653	20.0672	26582892	67.7395	Ileum	P350	67970	0.0215486	0.2953	Ileum	P350	26582892	0.825168	0.826754	5.80374	1.25492	2.58957	0.289916	0.432835	0.215116
H3K27ac	Jejunum	P348	40606978	47886	0.117926	850394	2.09668	4528632	11.4046	6956325	19.7735	28223741	69.5047	Jejunum	P348	46482	0.0121572	0.172	Jejunum	P348	28223741	0.819859	0.817743	5.40213	1.21054	4.4187	0.198232	0.35685	0.230801
H3K27ac	Jejunum	P350	41754596	914979	2.19133	536738	1.31426	3526467	8.74991	5503943	14.966	31272469	74.8959	Jejunum	P350	54366	0.0174446	0.2015	Jejunum	P350	31272469	0.856699	0.858112	7.08539	1.22062	2.09068	0.213954	0.351726	0.205636
H3K27ac	Stomach	P348	39693255	59769	0.150577	2062113	5.20296	3803501	10.1234	6842395	20.263	26925477	67.8339	Stomach	P348	52662	0.0189366	0.3224	Stomach	P348	26925477	0.820575	0.819907	5.51117	1.21642	6.41805	0.307958	0.446456	0.231996
H3K27ac	Stomach	P350	32337259	875082	2.70611	582828	1.85247	1504920	4.87355	4924407	16.7643	24450022	75.6094	Stomach	P350	88564	0.032997	0.4969	Stomach	P350	24450022	0.842066	0.845669	6.59383	1.29134	1.82794	0.420155	0.549572	0.215318
H3K27ac	Adipose	P348	44683723	111300	0.249084	35988827	80.7424	2110705	24.59	1026719	15.8618	5446172	12.1883	Adipose	P348	29985	0.00809755	0.2164	Adipose	P348	5446172	0.854471	0.877596	8.31374	1.30025	1.48202	0.253243	0.402215	0.227853
H3K27ac	Adipose	P350	32586575	108426	0.332732	4560406	14.0415	3372039	12.0785	5611923	22.8632	18933781	58.103	Adipose	P350	40810	0.00967479	0.2007	Adipose	P350	18933781	0.824753	0.826601	5.81027	1.42563	3.19453	0.237362	0.393762	0.23427
H3K27ac	Cerebellum	P348	38494084	392160	1.01875	1263405	3.31586	3107543	8.43558	6677657	19.7968	27053319	70.2792	Cerebellum	P348	87365	0.0244967	0.3233	Cerebellum	P348	27053319	0.823913	0.822708	5.57721	1.24238	2.09321	0.303597	0.452329	0.218837
H3K27ac	Cerebellum	P350	43166435	119425	0.276662	634770	1.4746	3656699	8.6218	9299106	23.9943	29456435	68.2392	Cerebellum	P350	61173	0.0206296	0.247	Cerebellum	P350	29456435	0.76733	0.767727	4.29747	1.18823	1.97024	0.228148	0.392991	0.241288
H3K27ac	Cortex	P348	35813301	556328	1.55341	1843389	5.22844	2618017	7.83519	6650275	21.5949	24145292	67.4199	Cortex	P348	71584	0.0254495	0.3555	Cortex	P348	24145292	0.809756	0.808791	5.184	1.16831	1.86876	0.315082	0.473353	0.236203
H3K27ac	Cortex	P350	77032911	104453	0.135595	5589751	7.26617	5340154	7.48563	23016508	34.8743	42982045	55.797	Cortex	P350	91391	0.0305133	0.3173	Cortex	P350	42982045	0.662148	0.663055	2.96958	1.31519	2.77947	0.25577	0.421146	0.242417
H3K27ac	Hypothalamus	P348	49423906	107997	0.218512	1890594	3.83364	3113323	6.56469	11582867	26.1394	32729125	66.2212	Hypothalamus	P348	82882	0.0310949	0.3806	Hypothalamus	P348	32729125	0.747136	0.748642	3.98732	1.21975	2.81294	0.311429	0.475302	0.246018
H3K27ac	Hypothalamus	P350	41589015	913632	2.19681	1506599	3.70396	3431060	8.75968	4842834	13.551	30894890	74.2862	Hypothalamus	P350	83927	0.0353134	0.3753	Hypothalamus	P350	30894890	0.88034	0.880921	8.41736	1.08265	-5.06229	0.303623	0.46965	0.23657
H3K27ac	Liver	P348	92070558	9891	0.0107428	32723760	35.5459	9423639	15.8816	9402748	18.8382	40510520	43.9994	Liver	P348	48554	0.0124404	0.114	Liver	P348	40510520	0.815207	0.814009	5.32218	1.1637	1.84086	0.116923	0.283312	0.236995
H3K27ac	Liver	P350	42470495	7282	0.017146	1977672	4.65738	5450813	13.4636	6026748	17.2022	29007980	68.3015	Liver	P350	73803	0.0233751	0.2544	Liver	P350	29007980	0.831045	0.83144	5.9349	1.17117	3.58745	0.222535	0.388503	0.242166
H3K27ac	Lung	P348	40334756	33460	0.0829558	752072	1.86612	4388347	11.0959	6642573	18.8919	28518304	70.704	Lung	P348	86220	0.0235188	0.3356	Lung	P348	28518304	0.814989	0.828857	6.35251	1.27188	3.36897	0.31164	0.462148	0.229284
H3K27ac	Lung	P350	32504503	4775	0.0146903	1642208	5.05299	4021831	13.0336	5100776	19.0074	21734913	66.8674	Lung	P350	54545	0.0144071	0.162	Lung	P350	21734913	0.813249	0.812769	5.31675	1.14599	4.52681	0.184363	0.361637	0.230081
H3K27ac	Muscle	P348	36491869	122753	0.336385	1392856	3.82978	2561997	7.32496	6762603	20.863	25651660	70.2942	Muscle	P348	81217	0.0241929	0.3908	Muscle	P348	25651660	0.819363	0.819794	5.52835	1.38467	2.94388	0.345511	0.495992	0.242316
H3K27ac	Muscle	P350	29403181	36292	0.123429	1248380	4.25098	1781894	6.33709	7778963	29.5367	18557652	63.1144	Muscle	P350	59477	0.021551	0.4734	Muscle	P350	18557652	0.737654	0.738404	3.8237	1.30361	2.2991	0.43378	0.547375	0.202534
H3K27ac	Spleen	P348	49731780	9108	0.0183142	1795537	3.6111	5998782	12.5165	4958141	11.8253	36970212	74.3392	Spleen	P348	150016	0.0473125	0.3124	Spleen	P348	36970212	0.88389	0.884817	8.71435	1.05951	0.921686	0.274832	0.389237	0.159115
H3K27ac	Spleen	P350	64951858	9319	0.0143475	2744273	4.22569	7946896	12.7767	11653860	21.4812	42597510	65.5832	Spleen	P350	75869	0.0272785	0.2893	Spleen	P350	42597510	0.789334	0.788335	4.68283	1.1354	5.13615	0.253492	0.404448	0.225983
H3K27me3	Cecum	P348	55943248	12348	0.0220724	439009	0.784913	5797326	10.4472	5838261	11.7483	43856304	78.3943	Cecum	P348	103116	0.0712818	0.2582	Cecum	P348	43856304	0.902488	0.90444	10.6363	1.11499	1.93749	0.179503	0.301815	0.151321
H3K27me3	Cecum	P350	64516058	13389	0.020753	295223	0.457691	6409580	9.98261	8880927	15.3655	48916939	75.8213	Cecum	P350	122219	0.08622	0.2794	Cecum	P350	48916939	0.866704	0.868413	7.6742	1.12584	2.61546	0.159261	0.294041	0.160124
H3K27me3	Colon	P348	93736804	125798	0.134203	848872	0.906808	10689151	11.5232	14403759	17.5499	67669224	72.1907	Colon	P348	105393	0.0790139	0.2682	Colon	P348	67669224	0.838296	0.838826	6.19668	1.0641	7.82476	0.118499	0.295776	0.216807
H3K27me3	Colon	P350	69125783	1065814	1.54185	840528	1.23498	6090154	9.06011	9994339	16.3495	51134948	73.9738	Colon	P350	71513	0.0699305	0.2222	Colon	P350	51134948	0.842577	0.84282	6.36372	1.05066	1.90856	0.0906614	0.273086	0.22422
H3K27me3	Duodenum	P348	75067426	2793548	3.72139	1385166	1.91655	10389545	14.6561	6340384	10.4801	54158783	72.1468	Duodenum	P348	65401	0.0546373	0.177	Duodenum	P348	54158783	0.903388	0.903843	10.4086	1.04887	1.00488	0.0826397	0.258506	0.215116
H3K27me3	Duodenum	P350	89529455	49644	0.0554499	3014182	3.36856	12375280	14.3124	12109242	16.3439	61981107	69.2298	Duodenum	P350	102386	0.0672046	0.2269	Duodenum	P350	61981107	0.864086	0.863583	7.28199	1.10523	2.65343	0.102428	0.277807	0.210445
H3K27me3	Ileum	P348	73252099	2694428	3.67829	1757603	2.49102	9986971	14.5159	6664779	11.3321	52148318	71.1902	Ileum	P348	62551	0.0404665	0.1587	Ileum	P348	52148318	0.896688	0.897747	9.84287	1.05149	1.31172	0.0919602	0.264024	0.215123
H3K27me3	Ileum	P350	79007635	55382	0.070097	2352635	2.97982	10941258	14.2837	10950601	16.6782	54707759	69.2436	Ileum	P350	82428	0.0504066	0.1798	Ileum	P350	54707759	0.861732	0.861218	7.16032	1.11918	2.70492	0.0878993	0.266391	0.21493
H3K27me3	Jejunum	P348	96212704	102719	0.106762	2145226	2.23205	13418288	14.2801	13282943	16.491	67263528	69.9113	Jejunum	P348	82560	0.0478686	0.1711	Jejunum	P348	67263528	0.851102	0.85107	6.69595	1.11349	2.1138	0.0769801	0.260342	0.23038
H3K27me3	Jejunum	P350	77225349	1810706	2.3447	2852802	3.78282	7379733	10.1703	9799541	15.0341	55382567	71.7155	Jejunum	P350	88356	0.0633037	0.2155	Jejunum	P350	55382567	0.855301	0.856326	6.99076	1.0549	2.16793	0.105164	0.272634	0.205573
H3K27me3	Stomach	P348	83617452	193027	0.230845	1817870	2.17906	11938568	14.6294	9997372	14.35	59670615	71.3614	Stomach	P348	96272	0.0781694	0.2671	Stomach	P348	59670615	0.870677	0.871871	7.84174	1.06514	1.88735	0.106033	0.291506	0.23248
H3K27me3	Stomach	P350	81969531	964555	1.17672	972411	1.20043	7217960	9.01878	12353313	16.9654	60461292	73.7607	Stomach	P350	121937	0.113126	0.369	Stomach	P350	60461292	0.836838	0.837457	6.1611	1.07071	7.44305	0.155022	0.337391	0.215051
H3K27me3	Adipose	P348	120504376	384255	0.318872	42393319	35.2924	13807265	17.7638	10847913	16.9712	53071624	44.0412	Adipose	P348	126767	0.109163	0.3578	Adipose	P348	53071624	0.846384	0.854318	7.03798	1.09925	1.35939	0.128342	0.324842	0.227813
H3K27me3	Adipose	P350	90423078	161585	0.178699	4433968	4.91236	13232306	15.4173	14538614	20.027	58056605	64.2055	Adipose	P350	99296	0.0680233	0.2429	Adipose	P350	58056605	0.832634	0.831955	5.90888	1.15521	2.70949	0.0980208	0.285404	0.233875
H3K27me3	Cerebellum	P348	98346556	372216	0.378474	2619292	2.67345	16708665	17.5226	17453680	22.1926	61192703	62.2215	Cerebellum	P348	124520	0.110518	0.3558	Cerebellum	P348	61192703	0.800324	0.799036	4.90756	1.09122	1.88975	0.141326	0.335047	0.218832
H3K27me3	Cerebellum	P350	79355403	217656	0.27428	1409095	1.78056	9574106	12.3173	15679980	23.0065	52474566	66.126	Cerebellum	P350	112472	0.0970731	0.3378	Cerebellum	P350	52474566	0.776927	0.778074	4.5088	1.1098	2.12708	0.124101	0.325359	0.241339
H3K27me3	Cortex	P348	101157414	1012291	1.00071	3488281	3.48323	18111171	18.7376	16664874	21.2168	61880797	61.1728	Cortex	P348	120702	0.105465	0.3463	Cortex	P348	61880797	0.812811	0.81326	5.32395	1.06053	1.20473	0.130732	0.338388	0.236109
H3K27me3	Cortex	P350	138134417	326519	0.236378	3763551	2.73101	20153567	15.035	33596607	29.499	80294173	58.1276	Cortex	P350	140179	0.123088	0.3626	Cortex	P350	80294173	0.714106	0.715391	3.50538	1.11776	3.51055	0.103587	0.324369	0.242175
H3K27me3	Hypothalamus	P348	86628925	181091	0.209042	1315465	1.52169	9999890	11.7463	18642379	24.8127	56490100	65.2093	Hypothalamus	P348	126034	0.105649	0.3617	Hypothalamus	P348	56490100	0.759532	0.760653	4.18169	1.11886	2.54974	0.133438	0.353654	0.246169
H3K27me3	Hypothalamus	P350	81159905	207164	0.255254	1855751	2.29239	11533932	14.582	16660537	24.6592	50902521	62.7188	Hypothalamus	P350	147606	0.0998684	0.3125	Hypothalamus	P350	50902521	0.772876	0.772467	4.37512	1.16932	2.32492	0.0939383	0.31456	0.236355
H3K27me3	Liver	P348	76408810	4623	0.00605035	1425879	1.86623	9895178	13.1974	15440540	23.7243	49642590	64.9697	Liver	P348	67320	0.0236	0.0721	Liver	P348	49642590	0.768	0.766	4.215	1.015	1.857	0.069	0.225	0.164
H3K27me3	Liver	P350	68079211	8381	0.0123107	1645599	2.41748	8691214	13.0842	10496843	18.1814	47237174	69.3856	Liver	P350	54306	0.021	0.0665	Liver	P350	47237174	0.822	0.823	5.654	1.012	1.475	0.083	0.229	0.157
H3K27me3	Lung	P348	70354992	48590	0.069064	1070492	1.52261	11010545	15.9029	12640584	21.7098	45584781	64.7925	Lung	P348	108744	0.0786785	0.2592	Lung	P348	45584781	0.786918	0.795059	5.10148	1.08319	1.13983	0.0964399	0.301831	0.229174
H3K27me3	Lung	P350	73019140	47378	0.0648844	1156527	1.5849	11343404	15.7953	14346876	23.7249	46124955	63.1683	Lung	P350	92121	0.0791782	0.239	Lung	P350	46124955	0.767389	0.776134	4.67257	1.08787	1.10752	0.0771805	0.282026	0.230059
H3K27me3	Muscle	P348	91529463	512973	0.560446	6771821	7.44021	12157970	14.4317	13074352	18.137	59012347	64.4736	Muscle	P348	105580	0.0836802	0.3043	Muscle	P348	59012347	0.838783	0.837843	6.11484	1.10482	19.6681	0.117323	0.316594	0.242232
H3K27me3	Muscle	P350	93076220	161842	0.173881	1617231	1.74056	11563529	12.6658	20836118	26.1322	58897500	63.2788	Muscle	P350	95946	0.0885435	0.3037	Muscle	P350	58897500	0.759165	0.759193	4.14157	1.07522	3.01021	0.134769	0.304605	0.202791
H3K27me3	Spleen	P348	71221336	3445	0.00483703	1712962	2.40524	9114340	13.1132	13835459	22.91	46555130	65.3668	Spleen	P348	38660	0.0137303	0.0461	Spleen	P348	46555130	0.776267	0.774956	4.38784	1.15402	2.9101	0.0622083	0.210411	0.159112
H3K27me3	Spleen	P350	79651536	2389158	2.99951	777464	1.00626	7643979	9.9941	11261302	16.3584	57579633	72.2894	Spleen	P350	99813	0.119247	0.3343	Spleen	P350	57579633	0.844516	0.846849	6.60823	1.03818	2.02718	0.108875	0.302005	0.225768
H3K4me1	Cecum	P348	62750821	15225	0.0242626	414017	0.65994	4681104	7.51121	8380252	14.5388	49260223	78.5013	Cecum	P348	173644	0.05056	0.3286	Cecum	P348	49260223	0.874537	0.876698	8.19167	1.14452	1.78035	0.276255	0.387877	0.151323
H3K4me1	Cecum	P350	54325010	3760	0.00692131	206926	0.38093	4199833	7.76104	10661836	21.3602	39252655	72.2552	Cecum	P350	108241	0.0233324	0.161	Cecum	P350	39252655	0.829642	0.831125	5.95717	1.22327	3.9994	0.189928	0.319204	0.160128
H3K4me1	Colon	P348	39210499	46122	0.117627	542895	1.3862	4368540	11.3112	5241245	15.3016	29011697	73.9896	Colon	P348	89106	0.0199843	0.1666	Colon	P348	29011697	0.857322	0.857205	6.97242	1.09642	2.50515	0.17844	0.351636	0.216886
H3K4me1	Colon	P350	31142396	669309	2.14919	266851	0.875694	2174525	7.19893	3916215	13.9707	24115496	77.4362	Colon	P350	73237	0.0186469	0.1481	Colon	P350	24115496	0.865427	0.86585	7.45833	1.06528	1.74752	0.166498	0.351537	0.224089
H3K4me1	Duodenum	P348	36459470	26188	0.0718277	326373	0.89581	3360224	9.30632	3843036	11.7356	28903649	79.2761	Duodenum	P348	93367	0.0268329	0.219	Duodenum	P348	28903649	0.892526	0.898392	10.3542	1.07253	2.41794	0.202679	0.371657	0.215276
H3K4me1	Duodenum	P350	37822599	14450	0.0382047	3474409	9.18958	4274375	12.4495	4166870	13.8621	25892495	68.4577	Duodenum	P350	44545	0.00818535	0.0688	Duodenum	P350	25892495	0.875139	0.875816	8.07382	1.12304	2.09354	0.120688	0.299463	0.210332
H3K4me1	Ileum	P348	32064384	22390	0.0698283	310113	0.967833	3120958	9.8354	3768372	13.1711	24842551	77.4771	Ileum	P348	65908	0.0167068	0.145	Ileum	P348	24842551	0.878486	0.884394	9.06458	1.08121	1.84451	0.16526	0.3385	0.215097
H3K4me1	Ileum	P350	35759490	28162	0.0787539	1288527	3.60615	3786122	10.9925	3981954	12.9889	26674725	74.5948	Ileum	P350	81570	0.0174272	0.1446	Ileum	P350	26674725	0.884866	0.885642	8.77603	1.12989	2.37561	0.164988	0.340812	0.215105
H3K4me1	Jejunum	P348	41435149	44353	0.107042	668016	1.61392	4386103	10.7706	6310675	17.3672	30026002	72.4651	Jejunum	P348	99052	0.0221052	0.19	Jejunum	P348	30026002	0.841511	0.840208	6.18565	1.11761	2.17832	0.193443	0.381241	0.230765
H3K4me1	Jejunum	P350	34110848	662268	1.94152	264194	0.789851	2889383	8.70706	3636256	12.0028	26658747	78.1533	Jejunum	P350	82446	0.0212778	0.1579	Jejunum	P350	26658747	0.884445	0.88534	8.75688	1.07242	1.46161	0.167311	0.334159	0.205587
H3K4me1	Stomach	P348	38723033	88828	0.229393	628511	1.62683	3376485	8.88416	5274534	15.2315	29354675	75.8068	Stomach	P348	118118	0.0318831	0.2725	Stomach	P348	29354675	0.860292	0.860459	7.15081	1.08692	3.8485	0.23443	0.417328	0.232004
H3K4me1	Stomach	P350	31684435	556699	1.75701	184379	0.59233	1822279	5.88908	3852395	13.2289	25268683	79.7511	Stomach	P350	124142	0.0348123	0.2753	Stomach	P350	25268683	0.87284	0.873493	7.91795	1.09389	2.17497	0.244757	0.416128	0.215272
H3K4me1	Adipose	P348	61115781	145052	0.23734	2823769	4.63135	5111569	8.79078	14168430	26.715	38866961	63.5956	Adipose	P348	105895	0.0259108	0.1958	Adipose	P348	38866961	0.740759	0.740518	3.84053	1.16074	2.82254	0.163489	0.344537	0.227853
H3K4me1	Adipose	P350	46073571	227817	0.494464	1535012	3.34821	3989894	9.00435	6556048	16.2597	33764800	73.2845	Adipose	P350	154404	0.0419933	0.3717	Adipose	P350	33764800	0.859381	0.861822	7.32449	1.12549	2.77029	0.282319	0.461718	0.234203
H3K4me1	Cerebellum	P348	34848658	164199	0.471177	398090	1.14775	2561196	7.47001	5352972	16.8729	26372201	75.6764	Cerebellum	P348	152418	0.0405999	0.351	Cerebellum	P348	26372201	0.844733	0.843747	6.33173	1.13474	2.22738	0.28557	0.455132	0.21884
H3K4me1	Cerebellum	P350	39339992	68535	0.174212	487543	1.24147	2933802	7.56448	7162728	19.9797	28687384	72.9217	Cerebellum	P350	111645	0.0300125	0.2607	Cerebellum	P350	28687384	0.806218	0.806848	5.17727	1.11028	1.73271	0.219469	0.409835	0.241295
H3K4me1	Cortex	P348	32871118	403696	1.22812	504428	1.55364	2538451	7.94184	4841004	16.4523	24583539	74.7877	Cortex	P348	123892	0.0319707	0.3066	Cortex	P348	24583539	0.847411	0.846463	6.43874	1.11048	1.6445	0.261228	0.447161	0.236188
H3K4me1	Cortex	P350	61225472	144395	0.235841	1469183	2.4053	3820043	6.40819	12616386	22.6133	43175465	70.5188	Cortex	P350	171388	0.0472408	0.3311	Cortex	P350	43175465	0.780826	0.780862	4.54989	1.12114	3.17556	0.227669	0.42506	0.242255
H3K4me1	Hypothalamus	P348	45454317	84938	0.186865	473942	1.04463	2783814	6.20066	8473374	20.1212	33638249	74.0045	Hypothalamus	P348	159435	0.0451957	0.3662	Hypothalamus	P348	33638249	0.804939	0.805487	5.13142	1.12383	1.96101	0.260285	0.45424	0.24604
H3K4me1	Hypothalamus	P350	32159706	55057	0.171199	592585	1.84579	2505044	7.94948	6349349	21.889	22657671	70.4536	Hypothalamus	P350	108850	0.0247628	0.2227	Hypothalamus	P350	22657671	0.792725	0.792357	4.79192	1.11401	1.77553	0.216196	0.407204	0.236581
H3K4me1	Liver	P348	30222769	1115843	3.69206	582840	2.00241	2182031	7.64978	3818648	14.4964	22523407	74.5246	Liver	P348	109879	0.0364134	0.3568	Liver	P348	22523407	0.861633	0.864349	7.48068	1.07655	1.5976	0.279691	0.453494	0.237176
H3K4me1	Liver	P350	34686993	198385	0.571929	928418	2.69196	4213222	12.5542	4584179	15.6206	24762789	71.3893	Liver	P350	125494	0.0357636	0.3298	Liver	P350	24762789	0.846957	0.862728	8.22482	1.07682	1.22992	0.25312	0.436846	0.24231
H3K4me1	Lung	P348	28542927	15165	0.0531305	627499	2.19961	3942719	14.1315	2678795	11.1814	21278749	74.55	Lung	P348	49040	0.00929347	0.0813	Lung	P348	21278749	0.890357	0.899392	10.8448	1.08976	0.91713	0.132528	0.327836	0.229264
H3K4me1	Lung	P350	79189368	10505	0.0132657	1374029	1.73535	10379161	13.34	8855616	13.1339	58570057	73.962	Lung	P350	132185	0.0323156	0.1793	Lung	P350	58570057	0.871345	0.871652	7.7704	1.05619	0.892267	0.12083	0.317699	0.229762
H3K4me1	Muscle	P348	34727412	109910	0.316493	319386	0.922614	3335472	9.72494	5297666	17.1099	25664978	73.9041	Muscle	P348	76264	0.0151534	0.1345	Muscle	P348	25664978	0.838714	0.836947	6.03999	1.12568	2.57301	0.151573	0.352587	0.242306
H3K4me1	Muscle	P350	32622048	46886	0.143725	420903	1.2921	2532182	7.87511	6346701	21.4256	23275376	71.3486	Muscle	P350	104934	0.0273742	0.2476	Muscle	P350	23275376	0.799731	0.799693	4.97682	1.11076	2.42694	0.251791	0.410873	0.20253
H3K4me1	Spleen	P348	75981643	8699	0.0114488	9914368	13.0499	9117329	13.8019	8263462	14.5123	48677785	64.0652	Spleen	P348	76986	0.0285633	0.2458	Spleen	P348	48677785	0.85778	0.858893	7.11548	1.1265	2.53136	0.24397	0.34743	0.159112
H3K4me1	Spleen	P350	30343622	22314	0.0735377	431419	1.42282	4003978	13.3958	3335852	12.8867	22550059	74.3156	Spleen	P350	75697	0.0144279	0.1387	Spleen	P350	22550059	0.873627	0.884069	9.42759	1.10617	1.10076	0.177906	0.362148	0.226059
H3K4me3	Cecum	P348	56865631	11482	0.0201915	701915	1.23459	4077500	7.26151	14581639	28.0014	37493095	65.9328	Cecum	P348	42562	0.0221873	0.5524	Cecum	P348	37493095	0.787069	0.803894	5.46837	1.18114	1.57052	0.521107	0.584474	0.151324
H3K4me3	Cecum	P350	63931535	19997	0.0312788	709078	1.10947	4684988	7.41267	16230457	27.7361	42287015	66.1442	Cecum	P350	40440	0.0210026	0.4834	Cecum	P350	42287015	0.784946	0.800472	5.33363	1.1891	1.45042	0.463367	0.534653	0.160129
H3K4me3	Colon	P348	43322301	59375	0.137054	774504	1.79023	4127414	9.71421	9174275	23.9156	29186733	67.3712	Colon	P348	37363	0.0177012	0.4906	Colon	P348	29186733	0.812008	0.816363	5.52532	1.23499	2.36141	0.458784	0.553873	0.216882
H3K4me3	Colon	P350	31996473	544254	1.70098	309650	0.984509	2553016	8.19783	4585296	16.0384	24004257	75.0216	Colon	P350	28965	0.0145359	0.3385	Colon	P350	24004257	0.847911	0.851719	6.86092	1.15985	1.95454	0.342795	0.454623	0.224096
H3K4me3	Duodenum	P348	45841088	4685078	10.2203	2027168	4.92557	4120394	10.5303	11720854	33.4801	23287594	50.8007	Duodenum	P348	29240	0.01251	0.5882	Duodenum	P348	23287594	0.743535	0.765553	4.65908	1.29717	3.61661	0.543978	0.627875	0.215283
H3K4me3	Duodenum	P350	44105770	30104	0.0682541	9698805	22.0049	3621381	10.5344	9091333	29.56	21664147	49.1186	Duodenum	P350	26666	0.0118369	0.4476	Duodenum	P350	21664147	0.789802	0.796182	5.03543	1.34409	1.86682	0.442678	0.531749	0.210412
H3K4me3	Ileum	P348	42471408	1086260	2.55763	1666061	4.02575	5010264	12.6142	5291678	15.2459	29417145	69.2634	Ileum	P348	25787	0.0105598	0.265	Ileum	P348	29417145	0.874995	0.87848	8.41893	1.30378	5.75883	0.295175	0.398543	0.215074
H3K4me3	Ileum	P350	41410335	19728	0.0476403	4444609	10.7382	3166756	8.57131	10167810	30.1008	23611432	57.0182	Ileum	P350	25681	0.0130125	0.5051	Ileum	P350	23611432	0.787182	0.795509	5.07078	1.28445	2.25496	0.479948	0.565865	0.215125
H3K4me3	Jejunum	P348	36921081	43055	0.116614	687781	1.86502	3438816	9.50205	6613501	20.193	26137928	70.794	Jejunum	P348	34654	0.0159671	0.4263	Jejunum	P348	26137928	0.832572	0.834791	6.0826	1.20979	4.42039	0.407596	0.518659	0.23074
H3K4me3	Jejunum	P350	35107434	592919	1.68887	321356	0.931075	3545478	10.369	4148701	13.5368	26498980	75.4797	Jejunum	P350	27844	0.0129548	0.2429	Jejunum	P350	26498980	0.871718	0.874594	8.08852	1.2187	1.99021	0.270386	0.379224	0.205566
H3K4me3	Stomach	P348	35008996	98565	0.281542	818969	2.34591	3012680	8.83705	6321122	20.339	24757660	70.718	Stomach	P348	32550	0.0154919	0.4675	Stomach	P348	24757660	0.83796	0.840767	6.33015	1.18404	1.71782	0.439065	0.545349	0.23202
H3K4me3	Stomach	P350	37946796	1039547	2.73949	580819	1.57373	3277431	9.02217	5649870	17.0954	27399129	72.2041	Stomach	P350	34882	0.0176861	0.4242	Stomach	P350	27399129	0.842316	0.849606	6.89351	1.22688	1.68414	0.405969	0.507902	0.215321
H3K4me3	Adipose	P348	40011875	21120	0.0527843	1185472	2.96437	2936657	7.56767	10891111	30.3639	24977515	62.4253	Adipose	P348	36527	0.0170987	0.4267	Adipose	P348	24977515	0.729542	0.730779	3.70596	1.28725	3.0147	0.406196	0.521777	0.227815
H3K4me3	Adipose	P350	39557331	69004	0.17444	1059263	2.68247	2781709	7.23856	10552797	29.6033	25094558	63.4385	Adipose	P350	36064	0.0162092	0.4818	Adipose	P350	25094558	0.746685	0.750144	4.02716	1.28907	2.39244	0.447764	0.561327	0.234246
H3K4me3	Cerebellum	P348	35425688	131586	0.371442	794354	2.25067	1913735	5.5471	9503830	29.1654	23082183	65.1566	Cerebellum	P348	37381	0.0191968	0.6917	Cerebellum	P348	23082183	0.773731	0.780072	4.63737	1.20831	2.18885	0.597044	0.683303	0.218873
H3K4me3	Cerebellum	P350	40402051	92649	0.229318	901170	2.23563	2925093	7.42254	9435051	25.8614	27048088	66.9473	Cerebellum	P350	34130	0.0177467	0.503	Cerebellum	P350	27048088	0.753585	0.763538	4.36466	1.19473	1.60488	0.454202	0.564766	0.241346
H3K4me3	Cortex	P348	45257752	199265	0.440289	1602480	3.55644	3161343	7.27481	10932367	27.1311	29362297	64.8779	Cortex	P348	38528	0.0193281	0.6378	Cortex	P348	29362297	0.736528	0.756436	4.48078	1.15515	2.83437	0.552313	0.651954	0.236211
H3K4me3	Cortex	P350	38705465	52066	0.134518	1322451	3.42131	3145047	8.42477	8881697	25.9806	25304204	65.3763	Cortex	P350	33069	0.0170375	0.4699	Cortex	P350	25304204	0.750806	0.759085	4.26814	1.21632	2.41733	0.429567	0.539546	0.242303
H3K4me3	Hypothalamus	P348	40369652	85412	0.211575	1004487	2.4935	3174431	8.0816	9377450	25.9725	26727872	66.2078	Hypothalamus	P348	34079	0.0169322	0.4852	Hypothalamus	P348	26727872	0.751632	0.761676	4.34379	1.19731	1.79012	0.440217	0.550115	0.246062
H3K4me3	Hypothalamus	P350	34340224	44335	0.129105	814726	2.37558	2412326	7.20502	8810078	28.3566	22258759	64.8183	Hypothalamus	P350	34084	0.0174505	0.5442	Hypothalamus	P350	22258759	0.755595	0.759002	4.18049	1.18897	1.63988	0.48616	0.590536	0.236591
H3K4me3	Liver	P348	42629709	1849	0.00433735	3207585	7.52462	4181814	10.6083	11109654	31.5271	24128807	56.6009	Liver	P348	27972	0.0127373	0.2622	Liver	P348	24128807	0.692037	0.682904	3.03212	1.19296	14.0886	0.274044	0.404108	0.237174
H3K4me3	Liver	P350	38819613	3647	0.00939474	921693	2.37452	2774300	7.32116	10343072	29.4507	24776901	63.8257	Liver	P350	30509	0.0156124	0.5122	Liver	P350	24776901	0.712551	0.719232	3.62425	1.18356	4.50835	0.465885	0.564399	0.242298
H3K4me3	Lung	P348	45829922	2145	0.00468035	1828409	3.98974	4777843	10.8589	8279484	21.1095	30942041	67.5149	Lung	P348	27603	0.0120788	0.203	Lung	P348	30942041	0.794034	0.793493	4.79559	1.16564	7.11993	0.227377	0.346464	0.2292
H3K4me3	Lung	P350	40858536	5713	0.0139824	535417	1.3106	4208015	10.4372	5261222	14.5702	30848169	75.4999	Lung	P350	26032	0.0125919	0.244	Lung	P350	30848169	0.857854	0.860812	7.26431	1.14825	5.78336	0.265507	0.374261	0.230023
H3K4me3	Muscle	P348	39445943	131078	0.332298	2083763	5.30019	4497084	12.0788	5260116	16.0693	27473902	69.6495	Muscle	P348	40561	0.0158119	0.4179	Muscle	P348	27473902	0.843948	0.855137	7.39576	1.2802	4.71591	0.394973	0.511681	0.242268
H3K4me3	Muscle	P350	47845755	92318	0.192949	1105477	2.31497	2576492	5.52327	15340835	34.809	28730633	60.0484	Muscle	P350	31179	0.0164193	0.611	Muscle	P350	28730633	0.671013	0.69583	3.55685	1.2187	1.45517	0.553703	0.636152	0.202531
H3K4me3	Spleen	P348	41479007	1436	0.00346199	3460993	8.34425	4185878	11.0107	10853951	32.0831	22976749	55.3937	Spleen	P348	28230	0.0129485	0.2297	Spleen	P348	22976749	0.686429	0.674401	2.92139	1.24102	13.9123	0.287369	0.378346	0.159117
H3K4me3	Spleen	P350	48889766	7457	0.0152527	617656	1.26356	4553865	9.4352	8175020	18.7025	35535768	72.6855	Spleen	P350	24240	0.0123089	0.29	Spleen	P350	35535768	0.817522	0.82341	5.80169	1.15532	9.24843	0.309119	0.405272	0.225971
ATAC-seq	Cecum	P348	81655817	79029	0.0967831	9796280	12.0087	18769818	26.1489	7027576	13.2569	45983114	56.3133	Cecum	P348	224252	0.0770831	0.3186
ATAC-seq	Cecum	P350	73934341	102976	0.13928	9833044	13.3182	20748022	32.4196	28882854	66.7807	14367445	19.4327	Cecum	P350	75648	0.0192231	0.1667
ATAC-seq	Colon	P348	81151316	84720	0.104398	2498482	3.08201	19588658	24.9321	17958865	30.4494	41020591	50.5483	Colon	P348	86874	0.0223128	0.2364
ATAC-seq	Colon	P350	130827755	83001	0.063443	10350575	7.91663	47051737	39.0814	27854958	37.9793	45487484	34.769	Colon	P350	119008	0.0319311	0.213
ATAC-seq	Duodenum	P348	96634620	94469	0.097759	2344868	2.4289	29428505	31.242	21003882	32.43	43762896	45.287	Duodenum	P348	92941	0.0221412	0.2371
ATAC-seq	Duodenum	P350	86908262	90037	0.1036	1843543	2.12345	26687500	31.4064	30477540	52.2886	27809642	31.9988	Duodenum	P350	72380	0.0160069	0.204
ATAC-seq	Ileum	P348	95993355	97503	0.101573	1992472	2.07775	27970658	29.7866	18935862	28.72	46996860	48.9585	Ileum	P348	103252	0.0240274	0.3589
ATAC-seq	Ileum	P350	79846482	42063	0.0526798	2067713	2.59098	19529469	25.1226	13245889	22.7564	44961348	56.3097	Ileum	P350	70149	0.0150242	0.1476
ATAC-seq	Jejunum	P348	99529387	50468	0.0507066	3730926	3.75047	19138382	19.9883	19057727	24.8764	57551884	57.824	Jejunum	P348	101448	0.0236668	0.1912
ATAC-seq	Jejunum	P350	107590344	59537	0.0553368	3391872	3.15433	25951454	24.92	19804585	25.3296	58382896	54.2641	Jejunum	P350	107348	0.0258948	0.3076
ATAC-seq	Stomach	P348	96115007	57780	0.0601155	3102159	3.22949	26078267	28.0547	15543958	23.2427	51332843	53.4077	Stomach	P348	43063	0.00839326	0.1596
ATAC-seq	Stomach2	P350	36615685	9004	0.0245906	3385966	9.24958	7122117	21.4388	610924	2.34083	25487674	69.6086	Stomach2	P350	12106	0.00265268	0.0204
ATAC-seq	Adipose	P348	46559499	29682	0.0637507	1401611	3.01229	9434525	20.906	5782274	16.1997	29911407	64.2434	Adipose	P348	163916	0.0504639	0.251
ATAC-seq	Adipose	P350	35819978	23262	0.0649414	1244684	3.47709	7958635	23.0338	5151028	19.3696	21442369	59.8615	Adipose	P350	115895	0.033117	0.2015
ATAC-seq	Cerebellum	P348	93194271	138024	0.148104	5416061	5.8202	43009673	49.0753	16924107	37.9205	27706406	29.7297	Cerebellum	P348	217304	0.0627958	0.2749
ATAC-seq	Cerebellum	P350	62908675	63693	0.101247	4576687	7.2825	26283373	45.1075	6574747	20.5558	25410175	40.3922	Cerebellum	P350	207913	0.0596121	0.3083
ATAC-seq	Cortex	P348	50962120	92113	0.180748	1677822	3.29825	18505042	37.6178	6492230	21.1562	24194913	47.4763	Cortex	P348	148718	0.0370582	0.2794
ATAC-seq	Cortex	P350	80435863	127358	0.158335	2416904	3.00952	31559403	40.5171	16008360	34.5513	30323838	37.6994	Cortex	P350	164076	0.0418525	0.2898
ATAC-seq	Hypothalamus	P348	56231863	66296	0.117898	2681018	4.77342	24160493	45.1728	11643345	39.7058	17680711	31.4425	Hypothalamus	P348	105661	0.0263948	0.2201
ATAC-seq	Hypothalamus	P350	85081503	121852	0.143218	3506134	4.12682	32917401	40.4125	23328867	48.065	25207249	29.6272	Hypothalamus	P350	146880	0.036725	0.2353
ATAC-seq	Liver	P348	85932193	83035	0.0966285	2188404	2.54913	42761305	51.1127	21768084	53.2234	19131365	22.2633	Liver	P348	113678	0.0258729	0.3315
ATAC-seq	Liver	P350	84976031	74959	0.0882119	2798168	3.2958	41400341	50.4249	11962000	29.3888	28740563	33.822	Liver	P350	139303	0.0351449	0.2657
ATAC-seq	Lung	P348	54043232	56007	0.103634	1774955	3.28773	14061497	26.9314	4955253	12.9886	33195520	61.424	Lung	P348	171977	0.0468823	0.2797
ATAC-seq	Lung	P350	55345090	44019	0.0795355	2163089	3.91148	16138557	30.371	3044329	8.22804	33955096	61.3516	Lung	P350	193310	0.0585112	0.3314
ATAC-seq	Muscle	P348	84105737	129683	0.15419	1363350	1.6235	14166230	17.1478	15570773	22.7488	52875701	62.8681	Muscle	P348	125765	0.0395718	0.4929
ATAC-seq	Muscle	P350	70534843	111640	0.158276	1030477	1.46326	10252982	14.7753	15732234	26.6018	43407510	61.5405	Muscle	P350	99956	0.0293058	0.5287
ATAC-seq	Spleen	P348	45774826	28886	0.0631046	1396856	3.05351	11353028	25.5992	3485156	10.5623	29510900	64.4697	Spleen	P348	105274	0.0267377	0.2675
ATAC-seq	Spleen	P350	46873646	50002	0.106674	1544172	3.29785	10792896	23.8362	3881589	11.2554	30604987	65.2925	Spleen	P350	104277	0.0273313	0.2126
RNA-seq	Cecum	P348	71265466	182626	0.256262	2604705	3.66432	2266035	3.30914	0	0	66212100	92.9091
RNA-seq	Cecum	P350	77839336	200038	0.256988	3180198	4.09612	2317054	3.11185	0	0	72142046	92.6807
RNA-seq	Colon	P348	63313615	272756	0.430801	1915499	3.0385	2004831	3.27987	0	0	59120529	93.3773
RNA-seq	Colon	P350	49425181	135424	0.273998	1702771	3.45461	1688422	3.54808	0	0	45898564	92.8647
RNA-seq	Duodenum	P348	57861899	245971	0.4251	2085464	3.6196	2543567	4.58049	0	0	52986897	91.5748
RNA-seq	Duodenum	P350	69269560	306666	0.442714	2414713	3.50147	2906662	4.36776	0	0	63641519	91.8752
RNA-seq	Ileum	P348	71816059	335564	0.467255	1974443	2.76221	1943894	2.79673	0	0	67562158	94.0767
RNA-seq	Ileum	P350	66553649	270851	0.406966	1961300	2.95899	1858778	2.88982	0	0	62462720	93.8532
RNA-seq	Jejunum	P348	57536883	276907	0.481269	1899170	3.31675	1951189	3.5245	0	0	53409617	92.8267
RNA-seq	Jejunum	P350	61642513	288019	0.467241	2105458	3.43163	2171910	3.66573	0	0	57077126	92.5938
RNA-seq	Stomach	P348	114539349	270633	0.236279	2464482	2.15674	2159481	1.93148	0	0	109644753	95.7267
RNA-seq	Stomach	P350	62603919	173571	0.277253	2180263	3.49231	1461792	2.42621	0	0	58788293	93.9051
RNA-seq	Adipose	P348	34566055	52105	0.15074	1094546	3.17131	728827	2.18085	0	0	32690577	94.5742
RNA-seq	Adipose	P350	43481309	33054	0.0760189	758727	1.74628	1016387	2.38088	0	0	41673141	95.8415
RNA-seq	Cerebellum	P348	42483326	22833	0.0537458	667882	1.57295	870445	2.08277	0	0	40922166	96.3252
RNA-seq	Cerebellum	P350	54886118	53964	0.0983199	725829	1.32373	1132461	2.09303	0	0	52973864	96.516
RNA-seq	Cortex	P348	37351657	28527	0.0763741	769935	2.06289	965526	2.64143	0	0	35587669	95.2774
RNA-seq	Cortex	P350	42495161	38212	0.0899208	959007	2.25878	2212606	5.33185	0	0	39285336	92.4466
RNA-seq	Hypothalamus	P348	43306121	27866	0.0643466	951308	2.19812	943603	2.22932	0	0	41383344	95.56
RNA-seq	Hypothalamus	P350	41392339	46847	0.113178	818165	1.97885	999097	2.46524	0	0	39528230	95.4965
RNA-seq	Liver	P348	38878746	31371	0.0806893	977318	2.51579	1106740	2.92247	0	0	36763317	94.5589
RNA-seq	Liver	P350	29602727	32357	0.109304	942049	3.18579	791712	2.76549	0	0	27836609	94.0339
RNA-seq	Lung	P348	61213152	35716	0.0583469	1132253	1.85077	1385299	2.30709	0	0	58659884	95.8289
RNA-seq	Lung	P350	65436471	36106	0.0551772	1038765	1.58832	1678482	2.60789	0	0	62683118	95.7923
RNA-seq	Muscle	P348	56938824	27801	0.0488261	1140569	2.00413	1990287	3.56871	0	0	53780167	94.4525
RNA-seq	Muscle	P350	42137621	34663	0.0822614	1375721	3.26752	1299048	3.18963	0	0	39428189	93.57
RNA-seq	Spleen	P348	49188411	27272	0.055444	1134577	2.30787	1741884	3.62692	0	0	46284678	94.0967
RNA-seq	Spleen	P350	33132526	27472	0.0829155	733848	2.21672	894614	2.76361	0	0	31476592	95.0021
RRBS	Adipose	P348	139119613					51418981	36.9603			87700632	63.0397
RRBS	Adipose	P350	139106866					51747536	37.1998			87359330	62.8002
RRBS	Cecum	P348	76231674					27934754	36.6446			48296920	63.3554
RRBS	Cecum	P350	75263784					28066832	37.2913			47196952	62.7087
RRBS	Cerebellum	P348	155142090					58928022	37.9833			96214068	62.0167
RRBS	Cerebellum	P350	150499290					62015908	41.2068			88483382	58.7932
RRBS	Colon	P350	71736214					27238376	37.9702			44497838	62.0298
RRBS	Cortex	P348	145273918					60142797	41.3996			85131121	58.6004
RRBS	Cortex	P350	132978315					53849452	40.4949			79128863	59.5051
RRBS	Duodenum	P348	68998436					25524462	36.9928			43473974	63.0072
RRBS	Duodenum	P350	70497872					26844110	38.0779			43653762	61.9221
RRBS	Hypothalamus	P348	146325319					59032037	40.343			87293282	59.657
RRBS	Hypothalamus	P350	139114088					54449293	39.14			84664795	60.86
RRBS	Ileum	P348	73727832					27449810	37.2313			46278022	62.7687
RRBS	Ileum	P350	73155310					27942096	38.1956			45213214	61.8044
RRBS	Jejunum	P348	31677865					10564019	33.3483			21113846	66.6517
RRBS	Jejunum	P350	21835194					5091910	23.3197			16743284	76.6803
RRBS	Liver	P348	146554972					55237910	37.6909			91317062	62.3091
RRBS	Liver	P350	130515766					56192387	43.0541			74323379	56.9459
RRBS	Lung	P348	162674845					60002030	36.8846			102672815	63.1154
RRBS	Lung	P350	158797478					57466201	36.1884			101331277	63.8116
RRBS	Muscle	P348	131787694					52138570	39.5625			79649124	60.4375
RRBS	Muscle	P350	146237075					54830947	37.4946			91406128	62.5054
RRBS	Spleen	P348	140084069					53605775	38.2669			86478294	61.7331
RRBS	Spleen	P350	144104594					54295459	37.6778			89809135	62.3222
RRBS	Stomach	P348	73282754					28176740	38.4493			45106014	61.5507
RRBS	Stomach	P350	70239062					27860546	39.6653			42378516	60.3347
ChIP-seq control	Cecum	P348	95915729	11972	0.0124818	1008828	1.05192	12969057	13.6668	10697978	13.0581	71227894	74.2609
ChIP-seq control	Cecum	P350	70071179	8820	0.0125872	605939	0.864857	8827984	12.7101	7261226	11.9766	53367210	76.1614
ChIP-seq control	Colon	P348	33545866	28470	0.0848689	699181	2.08602	6477779	19.7384	3834784	14.5585	22505652	67.0892
ChIP-seq control	Colon	P350	22150162	435131	1.96446	230556	1.06173	2398468	11.1637	1848001	9.68249	17238006	77.8234
ChIP-seq control	Duodenum	P348	27879540	9936	0.035639	203053	0.728582	3780912	13.666	3347762	14.0158	20537877	73.6665
ChIP-seq control	Duodenum	P350	31434034	7938	0.0252529	429412	1.36642	4456048	14.3759	4192763	15.7975	22347873	71.0945
ChIP-seq control	Ileum	P348	5963741	3434	0.0575813	76916	1.29047	805857	13.6972	800477	15.7651	4277057	71.7177
ChIP-seq control	Ileum	P350	29464652	9461	0.0321097	493534	1.67554	4084892	14.1045	3407061	13.6958	21469704	72.866
ChIP-seq control	Jejunum	P348	26983222	18899	0.0700398	460883	1.70923	4135482	15.6036	3114734	13.925	19253224	71.3526
ChIP-seq control	Jejunum	P350	27571472	435024	1.5778	208659	0.768925	3397958	12.6188	2148423	9.13064	21381408	77.549
ChIP-seq control	Stomach	P348	26546290	24857	0.0936364	518767	1.95603	4685553	18.0195	2809558	13.1798	18507555	69.718
ChIP-seq control	Stomach	P350	23471725	516470	2.20039	192283	0.837643	2789059	12.2526	1662715	8.32443	18311198	78.0139
ChIP-seq control	Adipose	P348	22853233	36638	0.160319	217283	0.952302	2569170	11.3684	3991718	19.9286	16038424	70.1801
ChIP-seq control	Adipose	P350	22583543	42823	0.18962	164374	0.729231	2674007	11.9502	3890527	19.7465	15811812	70.0148
ChIP-seq control	Cerebellum	P348	27997053	140677	0.502471	281716	1.01132	3945843	14.3097	3394274	14.365	20234543	72.2738
ChIP-seq control	Cerebellum	P350	22976412	25193	0.109647	181785	0.792049	3090275	13.572	3872084	19.6761	15807075	68.797
ChIP-seq control	Cortex	P348	26382492	226855	0.859869	458685	1.75368	3910239	15.2167	3558976	16.3355	18227737	69.0903
ChIP-seq control	Cortex	P350	19868461	30727	0.154652	244020	1.23008	2860811	14.6007	3004494	17.9556	13728409	69.0965
ChIP-seq control	Hypothalamus	P348	19224238	20786	0.108124	168623	0.878087	2802537	14.7232	2590014	15.9559	13642278	70.9639
ChIP-seq control	Hypothalamus	P350	24225285	43886	0.181158	294640	1.21846	3340206	13.9835	3901274	18.9875	16645279	68.7104
ChIP-seq control	Liver	P348	24697577	29476	0.119348	632327	2.56334	5125944	21.3263	499119	2.63947	18410711	74.5446
ChIP-seq control	Liver	P350	15106957	50081	0.33151	358075	2.37815	2898373	19.7184	99212	0.840749	11701216	77.4558
ChIP-seq control	Lung	P348	20721434	29122	0.14054	338432	1.63554	3685291	18.1061	560657	3.36355	16107932	77.7356
ChIP-seq control	Lung	P350	20656162	16893	0.0817819	311046	1.50706	3450093	16.9719	702706	4.16341	16175424	78.308
ChIP-seq control	Muscle	P348	16632078	121195	0.728682	380141	2.30237	3199674	19.8359	92333	0.71404	12838735	77.1926
ChIP-seq control	Muscle	P350	51546891	75779	0.14701	356822	0.693247	6521810	12.7593	9505864	21.3172	35086616	68.0674
ChIP-seq control	Spleen	P348	89438447	5693	0.00636527	1204433	1.34675	11600295	13.148	17512543	22.854	59115483	66.0963
ChIP-seq control	Spleen	P350	22638611	35098	0.155036	384122	1.69939	4078822	18.357	637806	3.51591	17502763	77.3138

## Sheet: Table S2 State_number
Table S2 Chromatin state number and state genome coverage in tissues
Type	State	Jejunum	Duodenum	Ileum	Cecum	Colon	Stomach	Adipose	Liver	Lung	Muscle	Spleen	Cerebellum	Cortex	Hypothalamus	Average
Peak number	TssA	16619	15579	16126	17663	19170	15817	12936	13663	14118	18720	13125	14615	15394	15857	15671.6
Peak number	TssAHet	5357	5682	7245	7548	5588	6591	6650	5314	3708	7700	2202	16707	8273	9351	6994
Peak number	TxFlnk	28267	22008	19444	39174	32619	30055	24967	22263	21731	27991	26025	20630	32890	30729	27056.6
Peak number	TxFlnkWk	17009	9149	8053	9638	9992	14507	40393	23612	10919	15500	7397	19409	19770	14960	15736.3
Peak number	TxFlnkHet	13597	8466	11603	28481	11670	17348	12173	18625	11879	8416	10822	27370	20951	31255	16618.3
Peak number	EnhA	31800	34249	34612	65150	51967	45963	15252	30681	39550	40705	53879	29150	52803	43807	40683.4
Peak number	EnhAMe	61444	53370	45988	37525	42793	58958	78612	52058	52390	56211	47048	43865	73708	38993	53068.8
Peak number	EnhAWk	17672	27415	28163	56599	40663	29011	6200	25508	37813	25560	41039	32200	37035	42076	31925.3
Peak number	EnhAHet	35069	34762	42117	81480	47062	47940	14660	54424	47948	28598	69894	62225	71936	87865	51855.7
Peak number	EnhPois	81393	64512	68427	67572	51455	82339	96235	89951	73395	57780	72460	98021	107222	97472	79159.6
Peak number	ATAC_Is	68129	58538	48691	124842	75821	96342	110450	91108	116966	68059	73031	132220	78415	75649	87018.6
Peak number	TssBiv	10637	9193	7919	11264	11462	11111	10656	3685	9568	10034	8793	12767	15093	11179	10240.1
Peak number	Repr	33688	31437	26271	38131	40066	52981	55710	9995	38937	47997	29584	61273	71909	65448	43101.9
Peak number	ReprWk	52492	50269	45066	57818	58432	73298	73005	39823	60671	60738	49020	84270	96378	91317	63756.9
Peak number	Qui	113994	104681	103884	156920	109956	136458	136934	150033	150876	102657	122491	188019	149802	145439	133725
genome coverage	TssA	0.52224	0.51271	0.53614	0.53169	0.62397	0.52326	0.43794	0.4235	0.48427	0.66638	0.42378	0.44163	0.46939	0.46556	0.516898
genome coverage	TssAHet	0.11886	0.12387	0.16198	0.19776	0.1186	0.14754	0.18465	0.14385	0.09222	0.17073	0.05939	0.44213	0.20453	0.21705	0.138132
genome coverage	TxFlnk	0.47385	0.36359	0.28824	0.77477	0.61074	0.56882	0.43816	0.34275	0.34257	0.49522	0.47259	0.28775	0.60131	0.49927	0.470118
genome coverage	TxFlnkWk	0.24773	0.11271	0.09591	0.12722	0.13261	0.20837	0.86786	0.49945	0.15417	0.23265	0.09224	0.32636	0.31019	0.19977	0.251902
genome coverage	TxFlnkHet	0.16815	0.09711	0.15419	0.48953	0.1483	0.24317	0.15647	0.29513	0.17419	0.11097	0.14701	0.46546	0.29491	0.50687	0.198565
genome coverage	EnhA	0.61382	0.70905	0.69066	1.34845	1.12833	1.04545	0.32691	0.50639	0.88062	1.20794	1.15293	0.43478	0.9669	0.66636	0.873686
genome coverage	EnhAMe	1.13586	1.00116	0.79109	0.63675	0.76512	1.16467	2.0032	1.01406	1.05407	1.25954	0.90537	0.75444	1.3714	0.62458	1.06644
genome coverage	EnhAWk	0.56846	0.97218	1.01681	2.13909	1.50152	1.03646	0.17889	1.06585	1.85187	0.8972	1.72316	1.24499	1.26754	1.54578	1.17741
genome coverage	EnhAHet	0.51548	0.49282	0.68821	1.6112	0.69469	0.75409	0.22293	1.30767	0.94173	0.42558	1.40797	1.36685	1.32132	2.06502	0.823852
genome coverage	EnhPois	2.62054	2.05337	2.25892	2.53093	1.68738	3.02737	3.43808	2.92327	3.03432	1.98466	2.58402	3.84707	3.47647	3.25363	2.55844
genome coverage	ATAC_Is	2.31638	1.86252	1.2513	9.85101	3.74695	5.79663	7.6771	4.95496	7.81589	3.75695	3.65102	8.10625	2.88126	3.56716	4.78916
genome coverage	TssBiv	0.58442	0.50063	0.44437	0.62036	0.64124	0.59427	0.52745	0.11279	0.51015	0.46921	0.48603	0.59134	0.72571	0.46515	0.499175
genome coverage	Repr	2.18676	1.97178	1.73562	2.22472	2.71141	4.35992	4.2623	0.29825	2.47239	4.27852	1.56085	4.42058	5.35102	4.76342	2.55114
genome coverage	ReprWk	10.6268	10.9268	9.87453	10.0605	11.3942	11.8447	10.3312	9.37496	10.7017	11.4289	11.1327	11.2071	14.9738	14.2916	10.6997
genome coverage	Qui	77.3007	78.2997	80.012	66.856	74.095	68.6853	68.9469	76.7371	69.4899	72.6156	74.201	66.0633	65.7843	66.8688	73.3854

## Sheet: Table S3 ChrX_GO
Talbe S3 genes GO enrichment in ChrX of module 1 of Large scale chromatin
geneSet	description	link	size	overlap	expect	enrichmentRatio	pValue	FDR	overlapId	userId
GO:0006325	chromatin organization	http://amigo.geneontology.org/amigo/term/GO:0006325	196	13	3.56173	3.64991	4.67724e-05	0.251027	664652;100037295;100154142;100513454;100517442;100519179;100519582;100519695;100520413;100524842;100525798;100620659;100621798	GATA1;HDAC6;TSPYL2;KDM5C;HUWE1;PHF8;USP51;OGT;NAP1L2;ENSSSCG00000012504;MORF4L2;UBE2A;CUL4B
GO:0051276	chromosome organization	http://amigo.geneontology.org/amigo/term/GO:0051276	300	15	5.45163	2.75147	0.00029703	0.797081	664652;100037295;100152604;100154142;100513454;100516889;100517442;100519179;100519582;100519695;100520413;100524842;100525798;100620659;100621798	GATA1;HDAC6;TSPYL2;KDM5C;HUWE1;PHF8;USP51;KIF4A;OGT;NAP1L2;ENSSSCG00000012504;CENPI;MORF4L2;UBE2A;CUL4B
GO:0016574	histone ubiquitination	http://amigo.geneontology.org/amigo/term/GO:0016574	12	3	0.218065	13.7574	0.00113782	1	100154142;100513454;100517442	HUWE1;UBE2A;CUL4B
GO:0016570	histone modification	http://amigo.geneontology.org/amigo/term/GO:0016570	131	8	2.38055	3.36057	0.00247473	1	664652;100037295;100154142;100513454;100517442;100519179;100520413;100621798	HDAC6;KDM5C;HUWE1;PHF8;USP51;OGT;UBE2A;CUL4B
GO:0016569	covalent chromatin modification	http://amigo.geneontology.org/amigo/term/GO:0016569	134	8	2.43506	3.28534	0.00285074	1	664652;100037295;100154142;100513454;100517442;100519179;100520413;100621798	HDAC6;KDM5C;HUWE1;PHF8;USP51;OGT;UBE2A;CUL4B
GO:0042989	sequestering of actin monomers	http://amigo.geneontology.org/amigo/term/GO:0042989	5	2	0.0908605	22.0118	0.00315542	1	100522845;100525848	ENSSSCG00000028695;ENSSSCG00000012517
GO:0051482	positive regulation of cytosolic calcium ion concentration involved in phospholipase C-activating G protein-coupled signaling pathway	http://amigo.geneontology.org/amigo/term/GO:0051482	5	2	0.0908605	22.0118	0.00315542	1	100038017;102160665	LPAR4;GPR174
GO:0033522	histone H2A ubiquitination	http://amigo.geneontology.org/amigo/term/GO:0033522	5	2	0.0908605	22.0118	0.00315542	1	100154142;100513454	UBE2A;CUL4B
GO:0009166	nucleotide catabolic process	http://amigo.geneontology.org/amigo/term/GO:0009166	36	4	0.654196	6.11438	0.00387428	1	397351;407608;664652;100515984	ENSSSCG00000026529;OGT;PGK1;HPRT1
GO:0060996	dendritic spine development	http://amigo.geneontology.org/amigo/term/GO:0060996	18	3	0.327098	9.17157	0.00389881	1	100523224;100621561;100621798	HDAC6;ENSSSCG00000012520;SLC9A6

## Sheet: Table S4 TSE_go_enrichment
Table S4 Gene Ontology of tissue specific expression genes
geneSet	description	Go	Jejunum	Duodenum	Ileum	Colon	Cecum	Stomach	Liver	Spleen	Lung	Muscle	Adipose	Cortex	Cerebellum	Hypothalamus
GO:0046835	carbohydrate phosphorylation	GO:0046835	3.6044	4.6567	0	0	0	0	0	0	0	0	0	0	0	0
GO:0043171	peptide catabolic process	GO:0043171	3.4065	4.3655	3.9161	0	0	0	0	0	0	0	0	0	0	0
GO:0006508	proteolysis	GO:0006508	2.4747	0	2.4957	0	0	0	3.5328	0	0	0	0	0	0	0
GO:0007263	nitric oxide mediated signal transduction	GO:0007263	2.1161	0	0	0	0	0	0	0	0	0	0	0	0	0
GO:0032094	response to food	GO:0032094	1.8932	0	0	0	0	0	0	0	0	0	0	0	0	0
GO:0071242	cellular response to ammonium ion	GO:0071242	1.8019	0	0	0	0	0	0	0	0	0	0	0	0	0
GO:0006767	water-soluble vitamin metabolic process	GO:0006767	1.6467	0	0	0	0	0	6.1432	0	0	0	0	0	0	0
GO:0060359	response to ammonium ion	GO:0060359	1.5183	0	0	0	0	0	0	0	0	0	0	0	0	0
GO:0048066	developmental pigmentation	GO:0048066	1.4617	0	1.7816	0	0	0	0	0	0	0	0	0	0	0
GO:0043603	cellular amide metabolic process	GO:0043603	1.4258	0	0	0	0	0	0	4.5463	0	0	0	0	0	0
GO:0048878	chemical homeostasis	GO:0048878	0	3.4254	0	0	0	0	0	0	3.2391	0	0	0	0	0
GO:0046365	monosaccharide catabolic process	GO:0046365	0	3.3498	0	0	0	0	0	0	0	0	0	0	0	0
GO:0006811	ion transport	GO:0006811	0	3.297	0	0	0	0	0	0	0	3.616	0	4.4185	3.2023	4.2717
GO:0005975	carbohydrate metabolic process	GO:0005975	0	3.2216	0	0	0	0	0	0	0	0	0	0	0	0
GO:0009070	serine family amino acid biosynthetic process	GO:0009070	0	3.116	0	0	0	0	0	0	0	0	0	0	0	0
GO:0055080	cation homeostasis	GO:0055080	0	2.9515	0	0	0	0	0	0	0	0	0	0	0	0
GO:0098771	inorganic ion homeostasis	GO:0098771	0	2.9259	0	0	0	0	0	0	0	0	0	0	0	0
GO:0042219	cellular modified amino acid catabolic process	GO:0042219	0	2.9212	0	0	0	0	0	0	0	0	0	0	0	0
GO:0051926	negative regulation of calcium ion transport	GO:0051926	0	0	2.0475	0	0	0	0	0	0	0	0	0	0	0
GO:0010466	negative regulation of peptidase activity	GO:0010466	0	0	1.9502	3.1917	0	0	4.2315	0	0	0	0	0	0	0
GO:0042531	positive regulation of tyrosine phosphorylation of STAT protein	GO:0042531	0	0	1.7816	0	0	0	0	4.0023	0	0	0	0	0	0
GO:0010469	regulation of signaling receptor activity	GO:0010469	0	0	1.7581	0	0	0	0	0	0	0	0	0	0	0
GO:0042509	regulation of tyrosine phosphorylation of STAT protein	GO:0042509	0	0	1.5846	0	0	0	0	3.4624	0	0	0	0	0	0
GO:0046427	positive regulation of JAK-STAT cascade	GO:0046427	0	0	1.5846	0	0	0	0	3.4624	0	0	0	0	0	0
GO:1904894	positive regulation of STAT cascade	GO:1904894	0	0	1.5846	0	0	0	0	3.4624	0	0	0	0	0	0
GO:0009954	proximal/distal pattern formation	GO:0009954	0	0	0	4.0919	3.296	0	0	0	0	0	0	0	0	0
GO:0051983	regulation of chromosome segregation	GO:0051983	0	0	0	3.98	0	0	0	0	0	0	0	0	0	0
GO:0060065	uterus development	GO:0060065	0	0	0	3.854	0	0	0	0	0	0	0	0	0	0
GO:0051346	negative regulation of hydrolase activity	GO:0051346	0	0	0	3.4912	0	0	4.3291	0	0	0	0	0	0	0
GO:0010951	negative regulation of endopeptidase activity	GO:0010951	0	0	0	3.3778	0	0	4.6904	0	0	0	0	0	0	0
GO:0098813	nuclear chromosome segregation	GO:0098813	0	0	0	3.3778	0	0	0	0	0	0	0	0	0	0
GO:0043270	positive regulation of ion transport	GO:0043270	0	0	0	3.2699	0	0	0	0	0	0	0	0	0	0
GO:0033045	regulation of sister chromatid segregation	GO:0033045	0	0	0	3.2644	0	0	0	0	0	0	0	0	0	0
GO:0045861	negative regulation of proteolysis	GO:0045861	0	0	0	3.1481	0	0	3.3479	0	0	0	0	0	0	0
GO:0009952	anterior/posterior pattern specification	GO:0009952	0	0	0	0	4.3274	0	0	0	0	0	0	0	0	0
GO:0007389	pattern specification process	GO:0007389	0	0	0	0	4.0569	0	0	0	0	0	0	0	0	0
GO:0061138	morphogenesis of a branching epithelium	GO:0061138	0	0	0	0	3.8616	0	0	0	0	0	0	0	0	0
GO:0003002	regionalization	GO:0003002	0	0	0	0	3.8126	0	0	0	0	0	0	0	0	0
GO:0061448	connective tissue development	GO:0061448	0	0	0	0	3.6856	0	0	0	0	0	0	0	0	0
GO:0001763	morphogenesis of a branching structure	GO:0001763	0	0	0	0	3.6297	0	0	0	0	0	0	0	0	0
GO:0071695	anatomical structure maturation	GO:0071695	0	0	0	0	3.5941	0	0	0	0	0	0	0	0	0
GO:0032414	positive regulation of ion transmembrane transporter activity	GO:0032414	0	0	0	0	3.296	0	0	0	0	0	0	0	0	0
GO:0002070	epithelial cell maturation	GO:0002070	0	0	0	0	3.296	0	0	0	0	0	0	0	0	0
GO:0048513	animal organ development	GO:0048513	0	0	0	0	0	4.4646	0	4.0433	0	0	0	0	0	0
GO:0001501	skeletal system development	GO:0001501	0	0	0	0	0	4.3894	0	0	0	0	0	0	0	0
GO:0032501	multicellular organismal process	GO:0032501	0	0	0	0	0	3.8745	0	0	0	0	0	0	0	0
GO:0032502	developmental process	GO:0032502	0	0	0	0	0	3.6511	0	3.3394	0	0	0	0	0	0
GO:0009888	tissue development	GO:0009888	0	0	0	0	0	3.5815	0	0	0	0	0	0	0	0
GO:0007275	multicellular organism development	GO:0007275	0	0	0	0	0	3.5576	0	2.9157	0	0	0	0	0	0
GO:0048856	anatomical structure development	GO:0048856	0	0	0	0	0	3.5193	0	0	0	0	0	0	0	0
GO:0030855	epithelial cell differentiation	GO:0030855	0	0	0	0	0	3.3577	0	0	0	0	0	0	0	0
GO:0006939	smooth muscle contraction	GO:0006939	0	0	0	0	0	3.3474	0	0	0	0	0	0	0	0
GO:0048731	system development	GO:0048731	0	0	0	0	0	3.2609	0	3.0314	0	0	0	0	0	3.6461
GO:0044281	small molecule metabolic process	GO:0044281	0	0	0	0	0	0	15	0	0	10.9328	4.0065	0	0	0
GO:0006082	organic acid metabolic process	GO:0006082	0	0	0	0	0	0	15	0	0	6.0743	3.4655	0	0	0
GO:0043436	oxoacid metabolic process	GO:0043436	0	0	0	0	0	0	15	0	0	6.3267	3.6254	0	0	0
GO:0019752	carboxylic acid metabolic process	GO:0019752	0	0	0	0	0	0	15	0	0	6.6424	3.8259	0	0	0
GO:0055114	oxidation-reduction process	GO:0055114	0	0	0	0	0	0	14.1764	0	0	11.7942	4.5971	0	0	0
GO:0044282	small molecule catabolic process	GO:0044282	0	0	0	0	0	0	11.0877	0	0	0	0	0	0	0
GO:0051186	cofactor metabolic process	GO:0051186	0	0	0	0	0	0	10.809	0	0	7.7899	0	0	0	0
GO:1901605	alpha-amino acid metabolic process	GO:1901605	0	0	0	0	0	0	10.476	0	0	0	0	0	0	0
GO:0016054	organic acid catabolic process	GO:0016054	0	0	0	0	0	0	10.1335	0	0	0	0	0	0	0
GO:0046395	carboxylic acid catabolic process	GO:0046395	0	0	0	0	0	0	10.1335	0	0	0	0	0	0	0
GO:0006520	cellular amino acid metabolic process	GO:0006520	0	0	0	0	0	0	9.5072	0	0	0	0	0	0	0
GO:1901615	organic hydroxy compound metabolic process	GO:1901615	0	0	0	0	0	0	9.2909	0	0	0	0	0	0	0
GO:0006066	alcohol metabolic process	GO:0006066	0	0	0	0	0	0	8.1454	0	0	0	0	0	0	0
GO:0033700	phospholipid efflux	GO:0033700	0	0	0	0	0	0	7.6161	0	0	0	0	0	0	0
GO:0032787	monocarboxylic acid metabolic process	GO:0032787	0	0	0	0	0	0	7.4624	0	0	5.4271	4.4726	0	0	0
GO:0006629	lipid metabolic process	GO:0006629	0	0	0	0	0	0	7.4531	0	0	0	5.9765	0	0	0
GO:0006575	cellular modified amino acid metabolic process	GO:0006575	0	0	0	0	0	0	7.3639	0	0	0	0	0	0	0
GO:0042737	drug catabolic process	GO:0042737	0	0	0	0	0	0	7.3484	0	0	0	0	0	0	0
GO:1901606	alpha-amino acid catabolic process	GO:1901606	0	0	0	0	0	0	7.3259	0	0	0	0	0	0	0
GO:1901575	organic substance catabolic process	GO:1901575	0	0	0	0	0	0	6.7828	0	0	0	0	0	0	0
GO:0008202	steroid metabolic process	GO:0008202	0	0	0	0	0	0	6.7334	0	0	0	0	0	0	0
GO:0009063	cellular amino acid catabolic process	GO:0009063	0	0	0	0	0	0	6.5711	0	0	0	0	0	0	0
GO:0034370	triglyceride-rich lipoprotein particle remodeling	GO:0034370	0	0	0	0	0	0	6.5244	0	0	0	0	0	0	0
GO:0034372	very-low-density lipoprotein particle remodeling	GO:0034372	0	0	0	0	0	0	6.5244	0	0	0	0	0	0	0
GO:0098754	detoxification	GO:0098754	0	0	0	0	0	0	6.4582	0	0	0	4.35	0	0	0
GO:0044255	cellular lipid metabolic process	GO:0044255	0	0	0	0	0	0	6.2944	0	0	0	4.4902	0	0	0
GO:0006790	sulfur compound metabolic process	GO:0006790	0	0	0	0	0	0	6.2656	0	0	0	0	0	0	0
GO:0006641	triglyceride metabolic process	GO:0006641	0	0	0	0	0	0	6.2593	0	0	0	0	0	0	0
GO:0097006	regulation of plasma lipoprotein particle levels	GO:0097006	0	0	0	0	0	0	6.2277	0	0	0	0	0	0	0
GO:0015914	phospholipid transport	GO:0015914	0	0	0	0	0	0	6.2277	0	0	0	0	0	0	0
GO:0006720	isoprenoid metabolic process	GO:0006720	0	0	0	0	0	0	6.2277	0	0	0	0	0	0	0
GO:0044248	cellular catabolic process	GO:0044248	0	0	0	0	0	0	6.2055	0	0	0	0	0	0	0
GO:0009056	catabolic process	GO:0009056	0	0	0	0	0	0	6.1653	0	0	0	0	0	0	0
GO:0006638	neutral lipid metabolic process	GO:0006638	0	0	0	0	0	0	6.1388	0	0	0	0	0	0	0
GO:0006639	acylglycerol metabolic process	GO:0006639	0	0	0	0	0	0	6.1388	0	0	0	0	0	0	0
GO:0034368	protein-lipid complex remodeling	GO:0034368	0	0	0	0	0	0	6.1234	0	0	0	0	0	0	0
GO:0034369	plasma lipoprotein particle remodeling	GO:0034369	0	0	0	0	0	0	6.1234	0	0	0	0	0	0	0
GO:0055088	lipid homeostasis	GO:0055088	0	0	0	0	0	0	5.9453	0	0	0	0	0	0	0
GO:0071825	protein-lipid complex subunit organization	GO:0071825	0	0	0	0	0	0	5.7604	0	0	0	0	0	0	0
GO:0071827	plasma lipoprotein particle organization	GO:0071827	0	0	0	0	0	0	5.7604	0	0	0	0	0	0	0
GO:0006766	vitamin metabolic process	GO:0006766	0	0	0	0	0	0	5.7111	0	0	0	0	0	0	0
GO:0043691	reverse cholesterol transport	GO:0043691	0	0	0	0	0	0	5.7106	0	0	0	0	0	0	0
GO:0009636	response to toxic substance	GO:0009636	0	0	0	0	0	0	5.6872	0	0	0	0	0	0	0
GO:0034367	protein-containing complex remodeling	GO:0034367	0	0	0	0	0	0	5.6323	0	0	0	0	0	0	0
GO:0042632	cholesterol homeostasis	GO:0042632	0	0	0	0	0	0	5.6008	0	0	0	0	0	0	0
GO:0055092	sterol homeostasis	GO:0055092	0	0	0	0	0	0	5.6008	0	0	0	0	0	0	0
GO:0010873	positive regulation of cholesterol esterification	GO:0010873	0	0	0	0	0	0	5.434	0	0	0	0	0	0	0
GO:0044283	small molecule biosynthetic process	GO:0044283	0	0	0	0	0	0	5.4052	0	0	0	0	0	0	0
GO:0017144	drug metabolic process	GO:0017144	0	0	0	0	0	0	5.3677	0	0	13.7017	0	0	0	0
GO:0044242	cellular lipid catabolic process	GO:0044242	0	0	0	0	0	0	5.3244	0	0	0	0	0	0	0
GO:0051004	regulation of lipoprotein lipase activity	GO:0051004	0	0	0	0	0	0	5.1397	0	0	0	0	0	0	0
GO:0006732	coenzyme metabolic process	GO:0006732	0	0	0	0	0	0	5.1149	0	0	7.1166	0	0	0	0
GO:0016053	organic acid biosynthetic process	GO:0016053	0	0	0	0	0	0	5.0267	0	0	3.0823	0	0	0	0
GO:0046394	carboxylic acid biosynthetic process	GO:0046394	0	0	0	0	0	0	5.0267	0	0	3.0823	0	0	0	0
GO:0007596	blood coagulation	GO:0007596	0	0	0	0	0	0	4.9759	0	0	0	0	0	0	0
GO:0016042	lipid catabolic process	GO:0016042	0	0	0	0	0	0	4.9586	0	0	0	3.3314	0	0	0
GO:0015711	organic anion transport	GO:0015711	0	0	0	0	0	0	4.8699	0	0	0	0	0	0	0
GO:0006631	fatty acid metabolic process	GO:0006631	0	0	0	0	0	0	4.8656	0	0	0	3.9258	0	0	0
GO:0006695	cholesterol biosynthetic process	GO:0006695	0	0	0	0	0	0	4.8567	0	0	0	0	0	0	0
GO:1902653	secondary alcohol biosynthetic process	GO:1902653	0	0	0	0	0	0	4.8567	0	0	0	0	0	0	0
GO:0007599	hemostasis	GO:0007599	0	0	0	0	0	0	4.8555	0	0	0	0	0	0	0
GO:0050817	coagulation	GO:0050817	0	0	0	0	0	0	4.8555	0	0	0	0	0	0	0
GO:0098869	cellular oxidant detoxification	GO:0098869	0	0	0	0	0	0	4.7881	0	0	0	3.3977	0	0	0
GO:0016126	sterol biosynthetic process	GO:0016126	0	0	0	0	0	0	4.7244	0	0	0	0	0	0	0
GO:0042730	fibrinolysis	GO:0042730	0	0	0	0	0	0	4.6937	0	0	0	0	0	0	0
GO:0034377	plasma lipoprotein particle assembly	GO:0034377	0	0	0	0	0	0	4.6937	0	0	0	0	0	0	0
GO:0065005	protein-lipid complex assembly	GO:0065005	0	0	0	0	0	0	4.6937	0	0	0	0	0	0	0
GO:0010872	regulation of cholesterol esterification	GO:0010872	0	0	0	0	0	0	4.6863	0	0	0	0	0	0	0
GO:0034380	high-density lipoprotein particle assembly	GO:0034380	0	0	0	0	0	0	4.6863	0	0	0	0	0	0	0
GO:0006721	terpenoid metabolic process	GO:0006721	0	0	0	0	0	0	4.572	0	0	0	0	0	0	0
GO:0046461	neutral lipid catabolic process	GO:0046461	0	0	0	0	0	0	4.572	0	0	0	0	0	0	0
GO:0046464	acylglycerol catabolic process	GO:0046464	0	0	0	0	0	0	4.572	0	0	0	0	0	0	0
GO:0008652	cellular amino acid biosynthetic process	GO:0008652	0	0	0	0	0	0	4.5282	0	0	0	0	0	0	0
GO:0072376	protein activation cascade	GO:0072376	0	0	0	0	0	0	4.5282	0	0	0	0	0	0	0
GO:1990748	cellular detoxification	GO:1990748	0	0	0	0	0	0	4.5188	0	0	0	3.9228	0	0	0
GO:0015748	organophosphate ester transport	GO:0015748	0	0	0	0	0	0	4.4314	0	0	0	0	0	0	0
GO:0016125	sterol metabolic process	GO:0016125	0	0	0	0	0	0	4.392	0	0	0	0	0	0	0
GO:0030193	regulation of blood coagulation	GO:0030193	0	0	0	0	0	0	4.3449	0	0	0	0	0	0	0
GO:1900046	regulation of hemostasis	GO:1900046	0	0	0	0	0	0	4.3449	0	0	0	0	0	0	0
GO:0034381	plasma lipoprotein particle clearance	GO:0034381	0	0	0	0	0	0	4.3269	0	0	0	0	0	0	0
GO:0019433	triglyceride catabolic process	GO:0019433	0	0	0	0	0	0	4.3269	0	0	0	0	0	0	0
GO:0097237	cellular response to toxic substance	GO:0097237	0	0	0	0	0	0	4.3188	2.8262	0	0	0	0	0	0
GO:0030195	negative regulation of blood coagulation	GO:0030195	0	0	0	0	0	0	4.3026	0	0	0	0	0	0	0
GO:1900047	negative regulation of hemostasis	GO:1900047	0	0	0	0	0	0	4.3026	0	0	0	0	0	0	0
GO:1901616	organic hydroxy compound catabolic process	GO:1901616	0	0	0	0	0	0	4.3026	0	0	0	0	0	0	0
GO:0072329	monocarboxylic acid catabolic process	GO:0072329	0	0	0	0	0	0	4.2943	0	0	0	0	0	0	0
GO:0008203	cholesterol metabolic process	GO:0008203	0	0	0	0	0	0	4.2943	0	0	0	0	0	0	0
GO:1902652	secondary alcohol metabolic process	GO:1902652	0	0	0	0	0	0	4.2943	0	0	0	0	0	0	0
GO:0006694	steroid biosynthetic process	GO:0006694	0	0	0	0	0	0	4.2699	0	0	0	0	0	0	0
GO:0032371	regulation of sterol transport	GO:0032371	0	0	0	0	0	0	4.1839	0	0	0	0	0	0	0
GO:0032374	regulation of cholesterol transport	GO:0032374	0	0	0	0	0	0	4.1839	0	0	0	0	0	0	0
GO:0071466	cellular response to xenobiotic stimulus	GO:0071466	0	0	0	0	0	0	4.1731	0	0	0	0	0	0	0
GO:0050818	regulation of coagulation	GO:0050818	0	0	0	0	0	0	4.1731	0	0	0	0	0	0	0
GO:0009072	aromatic amino acid family metabolic process	GO:0009072	0	0	0	0	0	0	4.1726	0	0	0	0	0	0	0
GO:0034433	steroid esterification	GO:0034433	0	0	0	0	0	0	4.1726	0	0	0	0	0	0	0
GO:0034434	sterol esterification	GO:0034434	0	0	0	0	0	0	4.1726	0	0	0	0	0	0	0
GO:0034435	cholesterol esterification	GO:0034435	0	0	0	0	0	0	4.1726	0	0	0	0	0	0	0
GO:0050819	negative regulation of coagulation	GO:0050819	0	0	0	0	0	0	4.0611	0	0	0	0	0	0	0
GO:0006805	xenobiotic metabolic process	GO:0006805	0	0	0	0	0	0	4.0611	0	0	0	0	0	0	0
GO:1901564	organonitrogen compound metabolic process	GO:1901564	0	0	0	0	0	0	4.0577	0	0	0	0	0	0	0
GO:0046165	alcohol biosynthetic process	GO:0046165	0	0	0	0	0	0	3.9169	0	0	0	0	0	0	0
GO:0006869	lipid transport	GO:0006869	0	0	0	0	0	0	3.8625	0	0	0	0	0	0	0
GO:0009066	aspartate family amino acid metabolic process	GO:0009066	0	0	0	0	0	0	3.8428	0	0	0	0	0	0	0
GO:0010876	lipid localization	GO:0010876	0	0	0	0	0	0	3.8274	0	0	0	0	0	0	0
GO:0006820	anion transport	GO:0006820	0	0	0	0	0	0	3.7831	0	0	0	0	0	0	0
GO:0008299	isoprenoid biosynthetic process	GO:0008299	0	0	0	0	0	0	3.7769	0	0	0	0	0	0	0
GO:0055090	acylglycerol homeostasis	GO:0055090	0	0	0	0	0	0	3.7455	0	0	0	0	0	0	0
GO:0070328	triglyceride homeostasis	GO:0070328	0	0	0	0	0	0	3.7455	0	0	0	0	0	0	0
GO:0009062	fatty acid catabolic process	GO:0009062	0	0	0	0	0	0	3.7153	0	0	3.0143	0	0	0	0
GO:0008610	lipid biosynthetic process	GO:0008610	0	0	0	0	0	0	3.6969	0	0	0	0	0	0	0
GO:0009410	response to xenobiotic stimulus	GO:0009410	0	0	0	0	0	0	3.6826	0	0	0	0	0	0	0
GO:0034384	high-density lipoprotein particle clearance	GO:0034384	0	0	0	0	0	0	3.675	0	0	0	0	0	0	0
GO:0042743	hydrogen peroxide metabolic process	GO:0042743	0	0	0	0	0	0	3.5076	0	0	0	0	0	0	0
GO:0046164	alcohol catabolic process	GO:0046164	0	0	0	0	0	0	3.5076	0	0	0	0	0	0	0
GO:0010035	response to inorganic substance	GO:0010035	0	0	0	0	0	0	3.4694	0	0	0	0	0	0	0
GO:0045940	positive regulation of steroid metabolic process	GO:0045940	0	0	0	0	0	0	3.455	0	0	0	0	0	0	0
GO:0043648	dicarboxylic acid metabolic process	GO:0043648	0	0	0	0	0	0	3.3552	0	0	0	0	0	0	0
GO:0061045	negative regulation of wound healing	GO:0061045	0	0	0	0	0	0	3.2933	0	0	0	0	0	0	0
GO:1901607	alpha-amino acid biosynthetic process	GO:1901607	0	0	0	0	0	0	3.2933	0	0	0	0	0	0	0
GO:0046503	glycerolipid catabolic process	GO:0046503	0	0	0	0	0	0	3.2933	0	0	0	0	0	0	0
GO:0033344	cholesterol efflux	GO:0033344	0	0	0	0	0	0	3.2933	0	0	0	0	0	0	0
GO:1901617	organic hydroxy compound biosynthetic process	GO:1901617	0	0	0	0	0	0	3.2581	0	0	0	0	0	0	0
GO:0009404	toxin metabolic process	GO:0009404	0	0	0	0	0	0	3.2271	0	0	0	0	0	0	0
GO:0042537	benzene-containing compound metabolic process	GO:0042537	0	0	0	0	0	0	3.2271	0	0	0	0	0	0	0
GO:0009074	aromatic amino acid family catabolic process	GO:0009074	0	0	0	0	0	0	3.2271	0	0	0	0	0	0	0
GO:0010896	regulation of triglyceride catabolic process	GO:0010896	0	0	0	0	0	0	3.2271	0	0	0	0	0	0	0
GO:0051006	positive regulation of lipoprotein lipase activity	GO:0051006	0	0	0	0	0	0	3.2271	0	0	0	0	0	0	0
GO:0061365	positive regulation of triglyceride lipase activity	GO:0061365	0	0	0	0	0	0	3.2271	0	0	0	0	0	0	0
GO:0010984	regulation of lipoprotein particle clearance	GO:0010984	0	0	0	0	0	0	3.2271	0	0	0	0	0	0	0
GO:0051187	cofactor catabolic process	GO:0051187	0	0	0	0	0	0	3.1376	0	0	0	0	0	0	0
GO:0034308	primary alcohol metabolic process	GO:0034308	0	0	0	0	0	0	3.1045	0	0	0	0	0	0	0
GO:0002526	acute inflammatory response	GO:0002526	0	0	0	0	0	0	3.0915	3.7245	4.2734	0	0	0	0	0
GO:1903035	negative regulation of response to wounding	GO:1903035	0	0	0	0	0	0	2.9929	0	0	0	0	0	0	0
GO:1901565	organonitrogen compound catabolic process	GO:1901565	0	0	0	0	0	0	2.9714	0	0	0	0	0	0	0
GO:0046486	glycerolipid metabolic process	GO:0046486	0	0	0	0	0	0	2.9519	0	0	0	0	0	0	0
GO:0006778	porphyrin-containing compound metabolic process	GO:0006778	0	0	0	0	0	0	2.951	0	0	0	0	0	0	0
GO:0006953	acute-phase response	GO:0006953	0	0	0	0	0	0	2.951	0	3.1675	0	0	0	0	0
GO:0010038	response to metal ion	GO:0010038	0	0	0	0	0	0	2.9401	0	0	0	0	0	0	0
GO:0006956	complement activation	GO:0006956	0	0	0	0	0	0	2.9312	0	0	0	0	0	0	0
GO:0017001	antibiotic catabolic process	GO:0017001	0	0	0	0	0	0	2.9312	2.7607	0	0	0	0	0	0
GO:0015850	organic hydroxy compound transport	GO:0015850	0	0	0	0	0	0	2.8913	0	0	0	0	0	0	0
GO:0019400	alditol metabolic process	GO:0019400	0	0	0	0	0	0	2.8882	0	0	0	0	0	0	0
GO:0050996	positive regulation of lipid catabolic process	GO:0050996	0	0	0	0	0	0	2.8882	0	0	0	0	0	0	0
GO:0046364	monosaccharide biosynthetic process	GO:0046364	0	0	0	0	0	0	2.8579	0	0	0	0	0	0	0
GO:0052548	regulation of endopeptidase activity	GO:0052548	0	0	0	0	0	0	2.8438	0	0	0	0	0	0	0
GO:0002376	immune system process	GO:0002376	0	0	0	0	0	0	0	8.8444	3.0467	0	0	0	0	0
GO:0002684	positive regulation of immune system process	GO:0002684	0	0	0	0	0	0	0	8.0844	0	0	0	0	0	0
GO:0006955	immune response	GO:0006955	0	0	0	0	0	0	0	7.8438	0	0	0	0	0	0
GO:0050778	positive regulation of immune response	GO:0050778	0	0	0	0	0	0	0	6.9445	0	0	0	0	0	0
GO:0002682	regulation of immune system process	GO:0002682	0	0	0	0	0	0	0	6.7003	0	0	0	0	0	0
GO:0050776	regulation of immune response	GO:0050776	0	0	0	0	0	0	0	6.6471	0	0	0	0	0	0
GO:0006412	translation	GO:0006412	0	0	0	0	0	0	0	6.4495	0	0	0	0	0	0
GO:0043043	peptide biosynthetic process	GO:0043043	0	0	0	0	0	0	0	6.3359	0	0	0	0	0	0
GO:0002768	immune response-regulating cell surface receptor signaling pathway	GO:0002768	0	0	0	0	0	0	0	6.2776	0	0	0	0	0	0
GO:0007166	cell surface receptor signaling pathway	GO:0007166	0	0	0	0	0	0	0	6.2734	0	0	0	0	0	0
GO:0002443	leukocyte mediated immunity	GO:0002443	0	0	0	0	0	0	0	5.9177	0	0	0	0	0	0
GO:0019221	cytokine-mediated signaling pathway	GO:0019221	0	0	0	0	0	0	0	5.9091	0	0	0	0	0	0
GO:0002764	immune response-regulating signaling pathway	GO:0002764	0	0	0	0	0	0	0	5.6951	0	0	0	0	0	0
GO:0071345	cellular response to cytokine stimulus	GO:0071345	0	0	0	0	0	0	0	5.6477	0	0	0	0	0	0
GO:0032649	regulation of interferon-gamma production	GO:0032649	0	0	0	0	0	0	0	5.5721	0	0	0	0	0	0
GO:0034097	response to cytokine	GO:0034097	0	0	0	0	0	0	0	5.465	0	0	0	0	0	0
GO:0002429	immune response-activating cell surface receptor signaling pathway	GO:0002429	0	0	0	0	0	0	0	5.4445	0	0	0	0	0	0
GO:0002703	regulation of leukocyte mediated immunity	GO:0002703	0	0	0	0	0	0	0	5.3787	0	0	0	0	0	0
GO:0032609	interferon-gamma production	GO:0032609	0	0	0	0	0	0	0	5.3224	0	0	0	0	0	0
GO:0032943	mononuclear cell proliferation	GO:0032943	0	0	0	0	0	0	0	5.3085	0	0	0	0	0	0
GO:0046651	lymphocyte proliferation	GO:0046651	0	0	0	0	0	0	0	5.3085	0	0	0	0	0	0
GO:0032729	positive regulation of interferon-gamma production	GO:0032729	0	0	0	0	0	0	0	5.2804	0	0	0	0	0	0
GO:0043604	amide biosynthetic process	GO:0043604	0	0	0	0	0	0	0	5.2537	0	0	0	0	0	0
GO:0002253	activation of immune response	GO:0002253	0	0	0	0	0	0	0	5.2444	0	0	0	0	0	0
GO:0070661	leukocyte proliferation	GO:0070661	0	0	0	0	0	0	0	5.1196	0	0	0	0	0	0
GO:0048584	positive regulation of response to stimulus	GO:0048584	0	0	0	0	0	0	0	5.0839	0	0	0	0	0	0
GO:0002757	immune response-activating signal transduction	GO:0002757	0	0	0	0	0	0	0	5.0543	0	0	0	0	0	0
GO:0016477	cell migration	GO:0016477	0	0	0	0	0	0	0	5.0535	4.1751	0	0	0	0	0
GO:0006518	peptide metabolic process	GO:0006518	0	0	0	0	0	0	0	5.0447	0	0	0	0	0	0
GO:0032715	negative regulation of interleukin-6 production	GO:0032715	0	0	0	0	0	0	0	5.0181	0	0	0	0	0	0
GO:0050867	positive regulation of cell activation	GO:0050867	0	0	0	0	0	0	0	4.999	0	0	0	0	0	0
GO:0032944	regulation of mononuclear cell proliferation	GO:0032944	0	0	0	0	0	0	0	4.9781	0	0	0	0	0	0
GO:0050670	regulation of lymphocyte proliferation	GO:0050670	0	0	0	0	0	0	0	4.9781	0	0	0	0	0	0
GO:0050865	regulation of cell activation	GO:0050865	0	0	0	0	0	0	0	4.9764	0	0	0	0	0	0
GO:0048870	cell motility	GO:0048870	0	0	0	0	0	0	0	4.8804	4.8123	0	0	0	0	0
GO:0051674	localization of cell	GO:0051674	0	0	0	0	0	0	0	4.8804	4.8123	0	0	0	0	0
GO:0007229	integrin-mediated signaling pathway	GO:0007229	0	0	0	0	0	0	0	4.8679	0	0	0	0	0	0
GO:0070663	regulation of leukocyte proliferation	GO:0070663	0	0	0	0	0	0	0	4.831	0	0	0	0	0	0
GO:0002181	cytoplasmic translation	GO:0002181	0	0	0	0	0	0	0	4.7811	0	0	0	0	0	0
GO:0032946	positive regulation of mononuclear cell proliferation	GO:0032946	0	0	0	0	0	0	0	4.6845	0	0	0	0	0	0
GO:0050671	positive regulation of lymphocyte proliferation	GO:0050671	0	0	0	0	0	0	0	4.6845	0	0	0	0	0	0
GO:0002250	adaptive immune response	GO:0002250	0	0	0	0	0	0	0	4.6604	0	0	0	0	0	0
GO:0002252	immune effector process	GO:0002252	0	0	0	0	0	0	0	4.657	0	0	0	0	0	0
GO:0002694	regulation of leukocyte activation	GO:0002694	0	0	0	0	0	0	0	4.629	0	0	0	0	0	0
GO:0007165	signal transduction	GO:0007165	0	0	0	0	0	0	0	4.5627	0	0	0	0	0	0
GO:0002449	lymphocyte mediated immunity	GO:0002449	0	0	0	0	0	0	0	4.5561	0	0	0	0	0	0
GO:0050896	response to stimulus	GO:0050896	0	0	0	0	0	0	0	4.5278	0	0	0	0	0	0
GO:0006952	defense response	GO:0006952	0	0	0	0	0	0	0	4.5219	5.0094	0	0	0	0	0
GO:0070665	positive regulation of leukocyte proliferation	GO:0070665	0	0	0	0	0	0	0	4.5012	0	0	0	0	0	0
GO:0010033	response to organic substance	GO:0010033	0	0	0	0	0	0	0	4.4387	4.3415	0	5.6536	0	0	0
GO:0018108	peptidyl-tyrosine phosphorylation	GO:0018108	0	0	0	0	0	0	0	4.4018	0	0	0	0	0	0
GO:0055094	response to lipoprotein particle	GO:0055094	0	0	0	0	0	0	0	4.372	0	0	0	0	0	0
GO:0071402	cellular response to lipoprotein particle stimulus	GO:0071402	0	0	0	0	0	0	0	4.372	0	0	0	0	0	0
GO:0002696	positive regulation of leukocyte activation	GO:0002696	0	0	0	0	0	0	0	4.3651	0	0	0	0	0	0
GO:0001775	cell activation	GO:0001775	0	0	0	0	0	0	0	4.3581	0	0	0	0	0	0
GO:0002460	adaptive immune response based on somatic recombination of immune receptors built from immunoglobulin superfamily domains	GO:0002460	0	0	0	0	0	0	0	4.3039	0	0	0	0	0	0
GO:0018212	peptidyl-tyrosine modification	GO:0018212	0	0	0	0	0	0	0	4.3038	0	0	0	0	0	0
GO:0032635	interleukin-6 production	GO:0032635	0	0	0	0	0	0	0	4.3034	0	0	0	0	0	0
GO:0071310	cellular response to organic substance	GO:0071310	0	0	0	0	0	0	0	4.2699	3.7396	0	0	0	0	0
GO:0002274	myeloid leukocyte activation	GO:0002274	0	0	0	0	0	0	0	4.2481	0	0	0	0	0	0
GO:0070887	cellular response to chemical stimulus	GO:0070887	0	0	0	0	0	0	0	4.246	4.0829	0	5.3899	0	0	0
GO:0001816	cytokine production	GO:0001816	0	0	0	0	0	0	0	4.2126	0	0	0	0	0	0
GO:0007159	leukocyte cell-cell adhesion	GO:0007159	0	0	0	0	0	0	0	4.2053	0	0	0	0	0	0
GO:0016064	immunoglobulin mediated immune response	GO:0016064	0	0	0	0	0	0	0	4.2047	0	0	0	0	0	0
GO:0019724	B cell mediated immunity	GO:0019724	0	0	0	0	0	0	0	4.2047	0	0	0	0	0	0
GO:0040011	locomotion	GO:0040011	0	0	0	0	0	0	0	4.1983	4.9173	0	0	0	0	0
GO:0002455	humoral immune response mediated by circulating immunoglobulin	GO:0002455	0	0	0	0	0	0	0	4.1663	0	0	0	0	0	0
GO:0045321	leukocyte activation	GO:0045321	0	0	0	0	0	0	0	4.1486	0	0	0	0	0	0
GO:0002699	positive regulation of immune effector process	GO:0002699	0	0	0	0	0	0	0	4.1479	0	0	0	0	0	0
GO:0040012	regulation of locomotion	GO:0040012	0	0	0	0	0	0	0	4.1246	5.0795	0	0	0	0	0
GO:0051716	cellular response to stimulus	GO:0051716	0	0	0	0	0	0	0	4.1183	0	0	0	0	0	0
GO:0030097	hemopoiesis	GO:0030097	0	0	0	0	0	0	0	4.0964	0	0	0	0	0	0
GO:0010543	regulation of platelet activation	GO:0010543	0	0	0	0	0	0	0	4.0827	0	0	0	0	0	0
GO:1903037	regulation of leukocyte cell-cell adhesion	GO:1903037	0	0	0	0	0	0	0	4.0716	0	0	0	0	0	0
GO:0001819	positive regulation of cytokine production	GO:0001819	0	0	0	0	0	0	0	4.0713	0	0	0	0	0	0
GO:0007154	cell communication	GO:0007154	0	0	0	0	0	0	0	4.0578	0	0	0	0	0	3.3247
GO:0002520	immune system development	GO:0002520	0	0	0	0	0	0	0	4.0232	0	0	0	0	0	0
GO:0002697	regulation of immune effector process	GO:0002697	0	0	0	0	0	0	0	4.0043	0	0	0	0	0	0
GO:2000145	regulation of cell motility	GO:2000145	0	0	0	0	0	0	0	3.9834	4.4893	0	0	0	0	0
GO:0030168	platelet activation	GO:0030168	0	0	0	0	0	0	0	3.9331	0	0	0	0	0	0
GO:0045785	positive regulation of cell adhesion	GO:0045785	0	0	0	0	0	0	0	3.9087	0	0	0	0	0	0
GO:0030334	regulation of cell migration	GO:0030334	0	0	0	0	0	0	0	3.8734	4.452	0	0	0	0	0
GO:0050853	B cell receptor signaling pathway	GO:0050853	0	0	0	0	0	0	0	3.8391	0	0	0	0	0	0
GO:0050851	antigen receptor-mediated signaling pathway	GO:0050851	0	0	0	0	0	0	0	3.8262	0	0	0	0	0	0
GO:0046649	lymphocyte activation	GO:0046649	0	0	0	0	0	0	0	3.8242	0	0	0	0	0	0
GO:0048534	hematopoietic or lymphoid organ development	GO:0048534	0	0	0	0	0	0	0	3.7472	0	0	0	0	0	0
GO:1901566	organonitrogen compound biosynthetic process	GO:1901566	0	0	0	0	0	0	0	3.7191	0	0	0	0	0	0
GO:0051251	positive regulation of lymphocyte activation	GO:0051251	0	0	0	0	0	0	0	3.6676	0	0	0	0	0	0
GO:0023052	signaling	GO:0023052	0	0	0	0	0	0	0	3.6398	0	0	0	0	0	3.7842
GO:0022407	regulation of cell-cell adhesion	GO:0022407	0	0	0	0	0	0	0	3.6391	0	0	0	0	0	0
GO:0042119	neutrophil activation	GO:0042119	0	0	0	0	0	0	0	3.6289	0	0	0	0	0	0
GO:0042221	response to chemical	GO:0042221	0	0	0	0	0	0	0	3.6133	3.4257	0	6.9685	0	0	0
GO:0002706	regulation of lymphocyte mediated immunity	GO:0002706	0	0	0	0	0	0	0	3.6107	0	0	0	0	0	0
GO:0002705	positive regulation of leukocyte mediated immunity	GO:0002705	0	0	0	0	0	0	0	3.6107	0	0	0	0	0	0
GO:0050900	leukocyte migration	GO:0050900	0	0	0	0	0	0	0	3.6092	3.0307	0	0	0	0	0
GO:0008284	positive regulation of cell proliferation	GO:0008284	0	0	0	0	0	0	0	3.6018	0	0	0	0	0	0
GO:0051270	regulation of cellular component movement	GO:0051270	0	0	0	0	0	0	0	3.6018	4.5328	0	0	0	0	0
GO:0009605	response to external stimulus	GO:0009605	0	0	0	0	0	0	0	3.5669	0	0	4.1203	0	0	0
GO:1903039	positive regulation of leukocyte cell-cell adhesion	GO:1903039	0	0	0	0	0	0	0	3.55	0	0	0	0	0	0
GO:0001817	regulation of cytokine production	GO:0001817	0	0	0	0	0	0	0	3.5414	0	0	0	0	0	0
GO:0042102	positive regulation of T cell proliferation	GO:0042102	0	0	0	0	0	0	0	3.5352	0	0	0	0	0	0
GO:0032675	regulation of interleukin-6 production	GO:0032675	0	0	0	0	0	0	0	3.5352	0	0	0	0	0	0
GO:0051249	regulation of lymphocyte activation	GO:0051249	0	0	0	0	0	0	0	3.4726	0	0	0	0	0	0
GO:0002437	inflammatory response to antigenic stimulus	GO:0002437	0	0	0	0	0	0	0	3.4624	0	0	0	0	0	0
GO:0072593	reactive oxygen species metabolic process	GO:0072593	0	0	0	0	0	0	0	3.4569	0	0	0	0	0	0
GO:0006928	movement of cell or subcellular component	GO:0006928	0	0	0	0	0	0	0	3.4432	3.6427	0	0	0	0	0
GO:0042127	regulation of cell proliferation	GO:0042127	0	0	0	0	0	0	0	3.4356	3.4424	0	0	0	0	0
GO:0006898	receptor-mediated endocytosis	GO:0006898	0	0	0	0	0	0	0	3.4314	4.4166	0	0	0	0	0
GO:0002675	positive regulation of acute inflammatory response	GO:0002675	0	0	0	0	0	0	0	3.4282	0	0	0	0	0	0
GO:1905941	positive regulation of gonad development	GO:1905941	0	0	0	0	0	0	0	3.4282	0	0	0	0	0	0
GO:0002283	neutrophil activation involved in immune response	GO:0002283	0	0	0	0	0	0	0	3.4282	0	0	0	0	0	0
GO:0015671	oxygen transport	GO:0015671	0	0	0	0	0	0	0	3.4282	0	0	0	0	0	0
GO:0032101	regulation of response to external stimulus	GO:0032101	0	0	0	0	0	0	0	3.3374	3.503	0	0	0	0	0
GO:0002822	regulation of adaptive immune response based on somatic recombination of immune receptors built from immunoglobulin superfamily domains	GO:0002822	0	0	0	0	0	0	0	3.3304	0	0	0	0	0	0
GO:0042129	regulation of T cell proliferation	GO:0042129	0	0	0	0	0	0	0	3.3304	0	0	0	0	0	0
GO:0002366	leukocyte activation involved in immune response	GO:0002366	0	0	0	0	0	0	0	3.3186	0	0	0	0	0	0
GO:0008283	cell proliferation	GO:0008283	0	0	0	0	0	0	0	3.2873	0	0	0	0	0	0
GO:0006954	inflammatory response	GO:0006954	0	0	0	0	0	0	0	3.2871	6.4156	0	0	0	0	0
GO:0002708	positive regulation of lymphocyte mediated immunity	GO:0002708	0	0	0	0	0	0	0	3.281	0	0	0	0	0	0
GO:0036230	granulocyte activation	GO:0036230	0	0	0	0	0	0	0	3.2798	0	0	0	0	0	0
GO:0050731	positive regulation of peptidyl-tyrosine phosphorylation	GO:0050731	0	0	0	0	0	0	0	3.2657	0	0	0	0	0	0
GO:0007260	tyrosine phosphorylation of STAT protein	GO:0007260	0	0	0	0	0	0	0	3.2434	0	0	0	0	0	0
GO:0050764	regulation of phagocytosis	GO:0050764	0	0	0	0	0	0	0	3.2434	0	0	0	0	0	0
GO:0048583	regulation of response to stimulus	GO:0048583	0	0	0	0	0	0	0	3.239	0	0	0	0	0	0
GO:0032103	positive regulation of response to external stimulus	GO:0032103	0	0	0	0	0	0	0	3.2164	4.6897	0	0	0	0	0
GO:0030099	myeloid cell differentiation	GO:0030099	0	0	0	0	0	0	0	3.2164	0	0	0	0	0	0
GO:0002263	cell activation involved in immune response	GO:0002263	0	0	0	0	0	0	0	3.2111	0	0	0	0	0	0
GO:0022409	positive regulation of cell-cell adhesion	GO:0022409	0	0	0	0	0	0	0	3.2111	0	0	0	0	0	0
GO:0007155	cell adhesion	GO:0007155	0	0	0	0	0	0	0	3.1886	4.9846	0	4.1823	0	0	0
GO:0030155	regulation of cell adhesion	GO:0030155	0	0	0	0	0	0	0	3.1837	2.9884	0	0	0	0	0
GO:0071404	cellular response to low-density lipoprotein particle stimulus	GO:0071404	0	0	0	0	0	0	0	3.1382	0	0	0	0	0	0
GO:2000010	positive regulation of protein localization to cell surface	GO:2000010	0	0	0	0	0	0	0	3.1382	0	0	0	0	0	0
GO:0002861	regulation of inflammatory response to antigenic stimulus	GO:0002861	0	0	0	0	0	0	0	3.1317	0	0	0	0	0	0
GO:0002367	cytokine production involved in immune response	GO:0002367	0	0	0	0	0	0	0	3.1281	0	0	0	0	0	0
GO:0002824	positive regulation of adaptive immune response based on somatic recombination of immune receptors built from immunoglobulin superfamily domains	GO:0002824	0	0	0	0	0	0	0	3.1281	0	0	0	0	0	0
GO:0022610	biological adhesion	GO:0022610	0	0	0	0	0	0	0	3.1209	4.8867	0	4.4685	0	0	0
GO:0002821	positive regulation of adaptive immune response	GO:0002821	0	0	0	0	0	0	0	3.056	0	0	0	0	0	0
GO:0044271	cellular nitrogen compound biosynthetic process	GO:0044271	0	0	0	0	0	0	0	3.0363	0	0	0	0	0	0
GO:0002819	regulation of adaptive immune response	GO:0002819	0	0	0	0	0	0	0	3.0249	0	0	0	0	0	0
GO:0051092	positive regulation of NF-kappaB transcription factor activity	GO:0051092	0	0	0	0	0	0	0	2.9866	0	0	0	0	0	0
GO:0050870	positive regulation of T cell activation	GO:0050870	0	0	0	0	0	0	0	2.9688	0	0	0	0	0	0
GO:1901224	positive regulation of NIK/NF-kappaB signaling	GO:1901224	0	0	0	0	0	0	0	2.9595	0	0	0	0	0	0
GO:0006897	endocytosis	GO:0006897	0	0	0	0	0	0	0	2.9297	4.9997	0	0	0	0	0
GO:0071677	positive regulation of mononuclear cell migration	GO:0071677	0	0	0	0	0	0	0	2.9061	0	0	0	0	0	0
GO:0090026	positive regulation of monocyte chemotaxis	GO:0090026	0	0	0	0	0	0	0	2.9061	0	0	0	0	0	0
GO:0002438	acute inflammatory response to antigenic stimulus	GO:0002438	0	0	0	0	0	0	0	2.9061	0	0	0	0	0	0
GO:0002863	positive regulation of inflammatory response to antigenic stimulus	GO:0002863	0	0	0	0	0	0	0	2.9061	0	0	0	0	0	0
GO:0033006	regulation of mast cell activation involved in immune response	GO:0033006	0	0	0	0	0	0	0	2.9061	0	0	0	0	0	0
GO:0043304	regulation of mast cell degranulation	GO:0043304	0	0	0	0	0	0	0	2.9061	0	0	0	0	0	0
GO:1901798	positive regulation of signal transduction by p53 class mediator	GO:1901798	0	0	0	0	0	0	0	2.9061	0	0	0	0	0	0
GO:0050901	leukocyte tethering or rolling	GO:0050901	0	0	0	0	0	0	0	2.9061	0	0	0	0	0	0
GO:1902533	positive regulation of intracellular signal transduction	GO:1902533	0	0	0	0	0	0	0	2.8861	3.2877	0	0	0	0	0
GO:0002718	regulation of cytokine production involved in immune response	GO:0002718	0	0	0	0	0	0	0	2.8745	0	0	0	0	0	0
GO:0042100	B cell proliferation	GO:0042100	0	0	0	0	0	0	0	2.8745	0	0	0	0	0	0
GO:0042273	ribosomal large subunit biogenesis	GO:0042273	0	0	0	0	0	0	0	2.8745	0	0	0	0	0	0
GO:0060326	cell chemotaxis	GO:0060326	0	0	0	0	0	0	0	2.8365	4.847	0	0	0	0	0
GO:0050730	regulation of peptidyl-tyrosine phosphorylation	GO:0050730	0	0	0	0	0	0	0	2.8262	0	0	0	0	0	0
GO:0042098	T cell proliferation	GO:0042098	0	0	0	0	0	0	0	2.8094	0	0	0	0	0	0
GO:0002700	regulation of production of molecular mediator of immune response	GO:0002700	0	0	0	0	0	0	0	2.7926	0	0	0	0	0	0
GO:0031663	lipopolysaccharide-mediated signaling pathway	GO:0031663	0	0	0	0	0	0	0	2.7607	0	0	0	0	0	0
GO:0002712	regulation of B cell mediated immunity	GO:0002712	0	0	0	0	0	0	0	2.7607	0	0	0	0	0	0
GO:0002889	regulation of immunoglobulin mediated immune response	GO:0002889	0	0	0	0	0	0	0	2.7607	0	0	0	0	0	0
GO:0001525	angiogenesis	GO:0001525	0	0	0	0	0	0	0	0	6.8757	0	4.7435	0	0	0
GO:1904018	positive regulation of vasculature development	GO:1904018	0	0	0	0	0	0	0	0	5.9844	0	0	0	0	0
GO:0043534	blood vessel endothelial cell migration	GO:0043534	0	0	0	0	0	0	0	0	5.5354	0	4.6338	0	0	0
GO:0048514	blood vessel morphogenesis	GO:0048514	0	0	0	0	0	0	0	0	5.3975	0	4.7258	0	0	0
GO:0001568	blood vessel development	GO:0001568	0	0	0	0	0	0	0	0	5.2945	0	4.8816	0	0	0
GO:0045766	positive regulation of angiogenesis	GO:0045766	0	0	0	0	0	0	0	0	5.2717	0	0	0	0	0
GO:0043535	regulation of blood vessel endothelial cell migration	GO:0043535	0	0	0	0	0	0	0	0	5.1599	0	3.6235	0	0	0
GO:0072359	circulatory system development	GO:0072359	0	0	0	0	0	0	0	0	5.1183	0	0	0	0	0
GO:0001944	vasculature development	GO:0001944	0	0	0	0	0	0	0	0	5.0886	0	4.638	0	0	0
GO:0072358	cardiovascular system development	GO:0072358	0	0	0	0	0	0	0	0	5.0087	0	4.5439	0	0	0
GO:0000165	MAPK cascade	GO:0000165	0	0	0	0	0	0	0	0	4.8019	0	0	0	0	0
GO:0070371	ERK1 and ERK2 cascade	GO:0070371	0	0	0	0	0	0	0	0	4.7267	0	0	0	0	0
GO:0023014	signal transduction by protein phosphorylation	GO:0023014	0	0	0	0	0	0	0	0	4.6952	0	0	0	0	0
GO:0070372	regulation of ERK1 and ERK2 cascade	GO:0070372	0	0	0	0	0	0	0	0	4.5632	0	0	0	0	0
GO:0098609	cell-cell adhesion	GO:0098609	0	0	0	0	0	0	0	0	4.5175	0	0	0	0	0
GO:1901342	regulation of vasculature development	GO:1901342	0	0	0	0	0	0	0	0	4.5016	0	0	0	0	0
GO:0002237	response to molecule of bacterial origin	GO:0002237	0	0	0	0	0	0	0	0	4.5016	0	0	0	0	0
GO:0048646	anatomical structure formation involved in morphogenesis	GO:0048646	0	0	0	0	0	0	0	0	4.4549	0	3.9592	0	0	0
GO:0098657	import into cell	GO:0098657	0	0	0	0	0	0	0	0	4.4398	0	0	0	0	0
GO:0035239	tube morphogenesis	GO:0035239	0	0	0	0	0	0	0	0	4.3249	0	0	0	0	0
GO:0045765	regulation of angiogenesis	GO:0045765	0	0	0	0	0	0	0	0	4.2181	0	0	0	0	0
GO:2000351	regulation of endothelial cell apoptotic process	GO:2000351	0	0	0	0	0	0	0	0	4.1566	0	0	0	0	0
GO:0009611	response to wounding	GO:0009611	0	0	0	0	0	0	0	0	4.0871	0	0	0	0	0
GO:0010632	regulation of epithelial cell migration	GO:0010632	0	0	0	0	0	0	0	0	4.0652	0	0	0	0	0
GO:0035295	tube development	GO:0035295	0	0	0	0	0	0	0	0	4.0492	0	0	0	0	0
GO:0002040	sprouting angiogenesis	GO:0002040	0	0	0	0	0	0	0	0	4.0479	0	0	0	0	0
GO:0032496	response to lipopolysaccharide	GO:0032496	0	0	0	0	0	0	0	0	4.0376	0	0	0	0	0
GO:0072577	endothelial cell apoptotic process	GO:0072577	0	0	0	0	0	0	0	0	4.0164	0	0	0	0	0
GO:0006935	chemotaxis	GO:0006935	0	0	0	0	0	0	0	0	3.9861	0	0	0	0	0
GO:0009617	response to bacterium	GO:0009617	0	0	0	0	0	0	0	0	3.9533	0	3.6561	0	0	0
GO:0042330	taxis	GO:0042330	0	0	0	0	0	0	0	0	3.9455	0	0	0	0	0
GO:0043408	regulation of MAPK cascade	GO:0043408	0	0	0	0	0	0	0	0	3.9358	0	0	0	0	0
GO:0043542	endothelial cell migration	GO:0043542	0	0	0	0	0	0	0	0	3.9281	0	4.9897	0	0	0
GO:0010631	epithelial cell migration	GO:0010631	0	0	0	0	0	0	0	0	3.923	0	3.7102	0	0	0
GO:0090132	epithelium migration	GO:0090132	0	0	0	0	0	0	0	0	3.923	0	3.7102	0	0	0
GO:0035556	intracellular signal transduction	GO:0035556	0	0	0	0	0	0	0	0	3.9182	0	0	0	0	0
GO:0010594	regulation of endothelial cell migration	GO:0010594	0	0	0	0	0	0	0	0	3.8976	0	0	0	0	0
GO:0050729	positive regulation of inflammatory response	GO:0050729	0	0	0	0	0	0	0	0	3.8423	0	0	0	0	0
GO:0040017	positive regulation of locomotion	GO:0040017	0	0	0	0	0	0	0	0	3.8264	0	0	0	0	0
GO:1903672	positive regulation of sprouting angiogenesis	GO:1903672	0	0	0	0	0	0	0	0	3.8205	0	0	0	0	0
GO:1904035	regulation of epithelial cell apoptotic process	GO:1904035	0	0	0	0	0	0	0	0	3.7613	0	0	0	0	0
GO:0090130	tissue migration	GO:0090130	0	0	0	0	0	0	0	0	3.759	0	3.5149	0	0	0
GO:0043410	positive regulation of MAPK cascade	GO:0043410	0	0	0	0	0	0	0	0	3.6234	0	0	0	0	0
GO:0071363	cellular response to growth factor stimulus	GO:0071363	0	0	0	0	0	0	0	0	3.6234	0	0	0	0	0
GO:2000147	positive regulation of cell motility	GO:2000147	0	0	0	0	0	0	0	0	3.5843	0	0	0	0	0
GO:0051179	localization	GO:0051179	0	0	0	0	0	0	0	0	3.573	0	0	0	0	0
GO:0042060	wound healing	GO:0042060	0	0	0	0	0	0	0	0	3.5585	0	0	0	0	0
GO:0035924	cellular response to vascular endothelial growth factor stimulus	GO:0035924	0	0	0	0	0	0	0	0	3.5579	0	0	0	0	0
GO:0070848	response to growth factor	GO:0070848	0	0	0	0	0	0	0	0	3.5458	0	0	0	0	0
GO:0030595	leukocyte chemotaxis	GO:0030595	0	0	0	0	0	0	0	0	3.5281	0	0	0	0	0
GO:0002042	cell migration involved in sprouting angiogenesis	GO:0002042	0	0	0	0	0	0	0	0	3.5104	0	3.4495	0	0	0
GO:0051272	positive regulation of cellular component movement	GO:0051272	0	0	0	0	0	0	0	0	3.4701	0	0	0	0	0
GO:0006909	phagocytosis	GO:0006909	0	0	0	0	0	0	0	0	3.4431	0	0	0	0	0
GO:1904019	epithelial cell apoptotic process	GO:1904019	0	0	0	0	0	0	0	0	3.4297	0	0	0	0	0
GO:0097529	myeloid leukocyte migration	GO:0097529	0	0	0	0	0	0	0	0	3.3751	0	0	0	0	0
GO:0043536	positive regulation of blood vessel endothelial cell migration	GO:0043536	0	0	0	0	0	0	0	0	3.3734	0	0	0	0	0
GO:0090050	positive regulation of cell migration involved in sprouting angiogenesis	GO:0090050	0	0	0	0	0	0	0	0	3.3499	0	0	0	0	0
GO:0003209	cardiac atrium morphogenesis	GO:0003209	0	0	0	0	0	0	0	0	3.3499	0	0	0	0	0
GO:0070374	positive regulation of ERK1 and ERK2 cascade	GO:0070374	0	0	0	0	0	0	0	0	3.3494	0	0	0	0	0
GO:0030335	positive regulation of cell migration	GO:0030335	0	0	0	0	0	0	0	0	3.3429	0	0	0	0	0
GO:0032879	regulation of localization	GO:0032879	0	0	0	0	0	0	0	0	3.2885	0	0	0	0	0
GO:0048771	tissue remodeling	GO:0048771	0	0	0	0	0	0	0	0	3.2448	0	0	0	0	0
GO:0001667	ameboidal-type cell migration	GO:0001667	0	0	0	0	0	0	0	0	3.2191	0	3.6358	0	0	0
GO:0051094	positive regulation of developmental process	GO:0051094	0	0	0	0	0	0	0	0	3.1742	0	0	0	0	0
GO:0001936	regulation of endothelial cell proliferation	GO:0001936	0	0	0	0	0	0	0	0	3.1685	0	0	0	0	0
GO:0003230	cardiac atrium development	GO:0003230	0	0	0	0	0	0	0	0	3.1675	0	0	0	0	0
GO:0009966	regulation of signal transduction	GO:0009966	0	0	0	0	0	0	0	0	3.1544	0	0	0	0	0
GO:1903670	regulation of sprouting angiogenesis	GO:1903670	0	0	0	0	0	0	0	0	3.128	0	0	0	0	0
GO:0050727	regulation of inflammatory response	GO:0050727	0	0	0	0	0	0	0	0	3.076	0	3.4525	0	0	0
GO:0043491	protein kinase B signaling	GO:0043491	0	0	0	0	0	0	0	0	3.0624	0	0	0	0	0
GO:0009719	response to endogenous stimulus	GO:0009719	0	0	0	0	0	0	0	0	3.0505	0	0	0	0	0
GO:0001935	endothelial cell proliferation	GO:0001935	0	0	0	0	0	0	0	0	3.0287	0	0	0	0	0
GO:2000352	negative regulation of endothelial cell apoptotic process	GO:2000352	0	0	0	0	0	0	0	0	3.0052	0	0	0	0	0
GO:0071495	cellular response to endogenous stimulus	GO:0071495	0	0	0	0	0	0	0	0	2.9877	0	0	0	0	0
GO:0071621	granulocyte chemotaxis	GO:0071621	0	0	0	0	0	0	0	0	2.9773	0	0	0	0	0
GO:0072521	purine-containing compound metabolic process	GO:0072521	0	0	0	0	0	0	0	0	0	inf	0	0	0	0
GO:0006163	purine nucleotide metabolic process	GO:0006163	0	0	0	0	0	0	0	0	0	inf	0	0	0	0
GO:0019693	ribose phosphate metabolic process	GO:0019693	0	0	0	0	0	0	0	0	0	inf	0	0	0	0
GO:0009259	ribonucleotide metabolic process	GO:0009259	0	0	0	0	0	0	0	0	0	inf	0	0	0	0
GO:0009150	purine ribonucleotide metabolic process	GO:0009150	0	0	0	0	0	0	0	0	0	inf	0	0	0	0
GO:0006091	generation of precursor metabolites and energy	GO:0006091	0	0	0	0	0	0	0	0	0	inf	0	0	0	0
GO:0009199	ribonucleoside triphosphate metabolic process	GO:0009199	0	0	0	0	0	0	0	0	0	inf	0	0	0	0
GO:0009144	purine nucleoside triphosphate metabolic process	GO:0009144	0	0	0	0	0	0	0	0	0	inf	0	0	0	0
GO:0009161	ribonucleoside monophosphate metabolic process	GO:0009161	0	0	0	0	0	0	0	0	0	inf	0	0	0	0
GO:0009205	purine ribonucleoside triphosphate metabolic process	GO:0009205	0	0	0	0	0	0	0	0	0	inf	0	0	0	0
GO:0009126	purine nucleoside monophosphate metabolic process	GO:0009126	0	0	0	0	0	0	0	0	0	inf	0	0	0	0
GO:0009167	purine ribonucleoside monophosphate metabolic process	GO:0009167	0	0	0	0	0	0	0	0	0	inf	0	0	0	0
GO:0046034	ATP metabolic process	GO:0046034	0	0	0	0	0	0	0	0	0	inf	0	0	0	0
GO:0009141	nucleoside triphosphate metabolic process	GO:0009141	0	0	0	0	0	0	0	0	0	15.9546	0	0	0	0
GO:0009123	nucleoside monophosphate metabolic process	GO:0009123	0	0	0	0	0	0	0	0	0	15.9546	0	0	0	0
GO:0009117	nucleotide metabolic process	GO:0009117	0	0	0	0	0	0	0	0	0	15.4775	0	0	0	0
GO:0006753	nucleoside phosphate metabolic process	GO:0006753	0	0	0	0	0	0	0	0	0	15.3525	0	0	0	0
GO:0055086	nucleobase-containing small molecule metabolic process	GO:0055086	0	0	0	0	0	0	0	0	0	14.5566	0	0	0	0
GO:0009060	aerobic respiration	GO:0009060	0	0	0	0	0	0	0	0	0	14.4494	0	0	0	0
GO:0015980	energy derivation by oxidation of organic compounds	GO:0015980	0	0	0	0	0	0	0	0	0	13.3282	0	0	0	0
GO:0045333	cellular respiration	GO:0045333	0	0	0	0	0	0	0	0	0	13.2966	0	0	0	0
GO:0022900	electron transport chain	GO:0022900	0	0	0	0	0	0	0	0	0	11.3415	0	0	0	0
GO:0006099	tricarboxylic acid cycle	GO:0006099	0	0	0	0	0	0	0	0	0	11.0219	0	0	0	0
GO:0019637	organophosphate metabolic process	GO:0019637	0	0	0	0	0	0	0	0	0	10.325	0	0	0	0
GO:0006101	citrate metabolic process	GO:0006101	0	0	0	0	0	0	0	0	0	10.2414	0	0	0	0
GO:0046390	ribose phosphate biosynthetic process	GO:0046390	0	0	0	0	0	0	0	0	0	9.5681	0	0	0	0
GO:0009152	purine ribonucleotide biosynthetic process	GO:0009152	0	0	0	0	0	0	0	0	0	9.4928	0	0	0	0
GO:0030239	myofibril assembly	GO:0030239	0	0	0	0	0	0	0	0	0	9.4215	0	0	0	0
GO:0009156	ribonucleoside monophosphate biosynthetic process	GO:0009156	0	0	0	0	0	0	0	0	0	9.3697	0	0	0	0
GO:0006164	purine nucleotide biosynthetic process	GO:0006164	0	0	0	0	0	0	0	0	0	9.29	0	0	0	0
GO:0006754	ATP biosynthetic process	GO:0006754	0	0	0	0	0	0	0	0	0	9.1716	0	0	0	0
GO:0055001	muscle cell development	GO:0055001	0	0	0	0	0	0	0	0	0	9.0686	0	0	0	0
GO:0045214	sarcomere organization	GO:0045214	0	0	0	0	0	0	0	0	0	9.0633	0	0	0	0
GO:0072350	tricarboxylic acid metabolic process	GO:0072350	0	0	0	0	0	0	0	0	0	9.0633	0	0	0	0
GO:0009260	ribonucleotide biosynthetic process	GO:0009260	0	0	0	0	0	0	0	0	0	9.0631	0	0	0	0
GO:0072522	purine-containing compound biosynthetic process	GO:0072522	0	0	0	0	0	0	0	0	0	9.0227	0	0	0	0
GO:0009124	nucleoside monophosphate biosynthetic process	GO:0009124	0	0	0	0	0	0	0	0	0	9.0085	0	0	0	0
GO:0006119	oxidative phosphorylation	GO:0006119	0	0	0	0	0	0	0	0	0	8.9469	0	0	0	0
GO:0009127	purine nucleoside monophosphate biosynthetic process	GO:0009127	0	0	0	0	0	0	0	0	0	8.8331	0	0	0	0
GO:0009168	purine ribonucleoside monophosphate biosynthetic process	GO:0009168	0	0	0	0	0	0	0	0	0	8.8331	0	0	0	0
GO:0055002	striated muscle cell development	GO:0055002	0	0	0	0	0	0	0	0	0	8.7311	0	0	0	0
GO:1901293	nucleoside phosphate biosynthetic process	GO:1901293	0	0	0	0	0	0	0	0	0	8.5389	0	0	0	0
GO:1901135	carbohydrate derivative metabolic process	GO:1901135	0	0	0	0	0	0	0	0	0	8.5144	0	0	0	0
GO:0009142	nucleoside triphosphate biosynthetic process	GO:0009142	0	0	0	0	0	0	0	0	0	8.4782	0	0	0	0
GO:0022904	respiratory electron transport chain	GO:0022904	0	0	0	0	0	0	0	0	0	8.1846	0	0	0	0
GO:0009206	purine ribonucleoside triphosphate biosynthetic process	GO:0009206	0	0	0	0	0	0	0	0	0	8.1315	0	0	0	0
GO:0007005	mitochondrion organization	GO:0007005	0	0	0	0	0	0	0	0	0	8.0529	0	0	0	0
GO:0009165	nucleotide biosynthetic process	GO:0009165	0	0	0	0	0	0	0	0	0	7.9643	0	0	0	0
GO:0009145	purine nucleoside triphosphate biosynthetic process	GO:0009145	0	0	0	0	0	0	0	0	0	7.9458	0	0	0	0
GO:0061061	muscle structure development	GO:0061061	0	0	0	0	0	0	0	0	0	7.8718	0	0	0	0
GO:0009201	ribonucleoside triphosphate biosynthetic process	GO:0009201	0	0	0	0	0	0	0	0	0	7.5934	0	0	0	0
GO:0051146	striated muscle cell differentiation	GO:0051146	0	0	0	0	0	0	0	0	0	7.5722	0	0	0	0
GO:0010927	cellular component assembly involved in morphogenesis	GO:0010927	0	0	0	0	0	0	0	0	0	7.5195	0	0	0	0
GO:0033108	mitochondrial respiratory chain complex assembly	GO:0033108	0	0	0	0	0	0	0	0	0	7.5195	0	0	0	0
GO:0042773	ATP synthesis coupled electron transport	GO:0042773	0	0	0	0	0	0	0	0	0	7.5195	0	0	0	0
GO:0009108	coenzyme biosynthetic process	GO:0009108	0	0	0	0	0	0	0	0	0	7.4675	0	0	0	0
GO:0042775	mitochondrial ATP synthesis coupled electron transport	GO:0042775	0	0	0	0	0	0	0	0	0	7.4342	0	0	0	0
GO:0042692	muscle cell differentiation	GO:0042692	0	0	0	0	0	0	0	0	0	7.3631	0	0	0	0
GO:0051188	cofactor biosynthetic process	GO:0051188	0	0	0	0	0	0	0	0	0	7.211	0	0	0	0
GO:0060537	muscle tissue development	GO:0060537	0	0	0	0	0	0	0	0	0	6.9064	0	0	0	0
GO:0031032	actomyosin structure organization	GO:0031032	0	0	0	0	0	0	0	0	0	6.9042	0	0	0	0
GO:0014706	striated muscle tissue development	GO:0014706	0	0	0	0	0	0	0	0	0	6.8707	0	0	0	0
GO:0015985	energy coupled proton transport, down electrochemical gradient	GO:0015985	0	0	0	0	0	0	0	0	0	6.6399	0	0	0	0
GO:0015986	ATP synthesis coupled proton transport	GO:0015986	0	0	0	0	0	0	0	0	0	6.6399	0	0	0	0
GO:0007517	muscle organ development	GO:0007517	0	0	0	0	0	0	0	0	0	6.3639	0	0	0	0
GO:0007519	skeletal muscle tissue development	GO:0007519	0	0	0	0	0	0	0	0	0	6.3533	0	0	0	0
GO:0010257	NADH dehydrogenase complex assembly	GO:0010257	0	0	0	0	0	0	0	0	0	6.2897	0	0	0	0
GO:0032981	mitochondrial respiratory chain complex I assembly	GO:0032981	0	0	0	0	0	0	0	0	0	6.2897	0	0	0	0
GO:0090407	organophosphate biosynthetic process	GO:0090407	0	0	0	0	0	0	0	0	0	6.2583	0	0	0	0
GO:0060538	skeletal muscle organ development	GO:0060538	0	0	0	0	0	0	0	0	0	6.1864	0	0	0	0
GO:0006733	oxidoreduction coenzyme metabolic process	GO:0006733	0	0	0	0	0	0	0	0	0	5.7227	0	0	0	0
GO:0006090	pyruvate metabolic process	GO:0006090	0	0	0	0	0	0	0	0	0	5.6417	0	0	0	0
GO:0016999	antibiotic metabolic process	GO:0016999	0	0	0	0	0	0	0	0	0	5.5792	0	0	0	0
GO:0033539	fatty acid beta-oxidation using acyl-CoA dehydrogenase	GO:0033539	0	0	0	0	0	0	0	0	0	5.4671	0	0	0	0
GO:0006637	acyl-CoA metabolic process	GO:0006637	0	0	0	0	0	0	0	0	0	5.2172	3.8952	0	0	0
GO:0035383	thioester metabolic process	GO:0035383	0	0	0	0	0	0	0	0	0	5.2172	3.8952	0	0	0
GO:0009132	nucleoside diphosphate metabolic process	GO:0009132	0	0	0	0	0	0	0	0	0	5.1494	0	0	0	0
GO:0030036	actin cytoskeleton organization	GO:0030036	0	0	0	0	0	0	0	0	0	4.9129	0	0	0	0
GO:0046031	ADP metabolic process	GO:0046031	0	0	0	0	0	0	0	0	0	4.7548	0	0	0	0
GO:0003009	skeletal muscle contraction	GO:0003009	0	0	0	0	0	0	0	0	0	4.7189	0	0	0	0
GO:0009135	purine nucleoside diphosphate metabolic process	GO:0009135	0	0	0	0	0	0	0	0	0	4.5859	0	0	0	0
GO:0009179	purine ribonucleoside diphosphate metabolic process	GO:0009179	0	0	0	0	0	0	0	0	0	4.5859	0	0	0	0
GO:0009185	ribonucleoside diphosphate metabolic process	GO:0009185	0	0	0	0	0	0	0	0	0	4.5859	0	0	0	0
GO:0006839	mitochondrial transport	GO:0006839	0	0	0	0	0	0	0	0	0	4.5745	0	0	0	0
GO:0034220	ion transmembrane transport	GO:0034220	0	0	0	0	0	0	0	0	0	4.5059	0	5.0518	3.5207	3.7456
GO:0030029	actin filament-based process	GO:0030029	0	0	0	0	0	0	0	0	0	4.4275	0	0	0	0
GO:0006996	organelle organization	GO:0006996	0	0	0	0	0	0	0	0	0	4.4202	0	0	0	0
GO:0098655	cation transmembrane transport	GO:0098655	0	0	0	0	0	0	0	0	0	4.4171	0	0	0	0
GO:0048747	muscle fiber development	GO:0048747	0	0	0	0	0	0	0	0	0	4.3456	0	0	0	0
GO:0048641	regulation of skeletal muscle tissue development	GO:0048641	0	0	0	0	0	0	0	0	0	4.3456	0	0	0	0
GO:0006084	acetyl-CoA metabolic process	GO:0006084	0	0	0	0	0	0	0	0	0	4.3456	0	0	0	0
GO:0034440	lipid oxidation	GO:0034440	0	0	0	0	0	0	0	0	0	4.2744	5.0646	0	0	0
GO:0006165	nucleoside diphosphate phosphorylation	GO:0006165	0	0	0	0	0	0	0	0	0	4.2744	0	0	0	0
GO:0046939	nucleotide phosphorylation	GO:0046939	0	0	0	0	0	0	0	0	0	4.2744	0	0	0	0
GO:1990542	mitochondrial transmembrane transport	GO:1990542	0	0	0	0	0	0	0	0	0	4.2253	0	0	0	0
GO:0050879	multicellular organismal movement	GO:0050879	0	0	0	0	0	0	0	0	0	4.2047	0	0	0	0
GO:0050881	musculoskeletal movement	GO:0050881	0	0	0	0	0	0	0	0	0	4.2047	0	0	0	0
GO:0006793	phosphorus metabolic process	GO:0006793	0	0	0	0	0	0	0	0	0	4.0927	0	0	0	0
GO:0019359	nicotinamide nucleotide biosynthetic process	GO:0019359	0	0	0	0	0	0	0	0	0	4.0633	0	0	0	0
GO:0019363	pyridine nucleotide biosynthetic process	GO:0019363	0	0	0	0	0	0	0	0	0	4.0633	0	0	0	0
GO:0009166	nucleotide catabolic process	GO:0009166	0	0	0	0	0	0	0	0	0	3.9931	0	0	0	0
GO:0019362	pyridine nucleotide metabolic process	GO:0019362	0	0	0	0	0	0	0	0	0	3.9768	0	0	0	0
GO:0046496	nicotinamide nucleotide metabolic process	GO:0046496	0	0	0	0	0	0	0	0	0	3.9768	0	0	0	0
GO:0072525	pyridine-containing compound biosynthetic process	GO:0072525	0	0	0	0	0	0	0	0	0	3.9105	0	0	0	0
GO:0033865	nucleoside bisphosphate metabolic process	GO:0033865	0	0	0	0	0	0	0	0	0	3.9105	0	0	0	0
GO:0033875	ribonucleoside bisphosphate metabolic process	GO:0033875	0	0	0	0	0	0	0	0	0	3.9105	0	0	0	0
GO:0034032	purine nucleoside bisphosphate metabolic process	GO:0034032	0	0	0	0	0	0	0	0	0	3.9105	0	0	0	0
GO:1902600	proton transmembrane transport	GO:1902600	0	0	0	0	0	0	0	0	0	3.8958	0	0	0	0
GO:0060415	muscle tissue morphogenesis	GO:0060415	0	0	0	0	0	0	0	0	0	3.8848	0	0	0	0
GO:0098662	inorganic cation transmembrane transport	GO:0098662	0	0	0	0	0	0	0	0	0	3.8687	0	0	0	0
GO:0006096	glycolytic process	GO:0006096	0	0	0	0	0	0	0	0	0	3.8643	0	0	0	0
GO:0006757	ATP generation from ADP	GO:0006757	0	0	0	0	0	0	0	0	0	3.8643	0	0	0	0
GO:0072524	pyridine-containing compound metabolic process	GO:0072524	0	0	0	0	0	0	0	0	0	3.8605	0	0	0	0
GO:0006796	phosphate-containing compound metabolic process	GO:0006796	0	0	0	0	0	0	0	0	0	3.8447	0	0	0	0
GO:0035384	thioester biosynthetic process	GO:0035384	0	0	0	0	0	0	0	0	0	3.8086	0	0	0	0
GO:0071616	acyl-CoA biosynthetic process	GO:0071616	0	0	0	0	0	0	0	0	0	3.8086	0	0	0	0
GO:0006085	acetyl-CoA biosynthetic process	GO:0006085	0	0	0	0	0	0	0	0	0	3.8086	0	0	0	0
GO:0019395	fatty acid oxidation	GO:0019395	0	0	0	0	0	0	0	0	0	3.7661	3.6235	0	0	0
GO:1901137	carbohydrate derivative biosynthetic process	GO:1901137	0	0	0	0	0	0	0	0	0	3.7617	0	0	0	0
GO:0055085	transmembrane transport	GO:0055085	0	0	0	0	0	0	0	0	0	3.744	0	5.2237	0	3.7367
GO:1901661	quinone metabolic process	GO:1901661	0	0	0	0	0	0	0	0	0	3.7011	0	0	0	0
GO:0030240	skeletal muscle thin filament assembly	GO:0030240	0	0	0	0	0	0	0	0	0	3.7011	0	0	0	0
GO:0006635	fatty acid beta-oxidation	GO:0006635	0	0	0	0	0	0	0	0	0	3.6994	0	0	0	0
GO:0042866	pyruvate biosynthetic process	GO:0042866	0	0	0	0	0	0	0	0	0	3.6994	0	0	0	0
GO:0035914	skeletal muscle cell differentiation	GO:0035914	0	0	0	0	0	0	0	0	0	3.6854	0	0	0	0
GO:0003012	muscle system process	GO:0003012	0	0	0	0	0	0	0	0	0	3.6779	0	0	0	0
GO:0072330	monocarboxylic acid biosynthetic process	GO:0072330	0	0	0	0	0	0	0	0	0	3.649	0	0	0	0
GO:0016052	carbohydrate catabolic process	GO:0016052	0	0	0	0	0	0	0	0	0	3.6181	0	0	0	0
GO:1901292	nucleoside phosphate catabolic process	GO:1901292	0	0	0	0	0	0	0	0	0	3.6181	0	0	0	0
GO:0006941	striated muscle contraction	GO:0006941	0	0	0	0	0	0	0	0	0	3.4996	0	0	0	0
GO:0015672	monovalent inorganic cation transport	GO:0015672	0	0	0	0	0	0	0	0	0	3.449	0	0	0	0
GO:0006812	cation transport	GO:0006812	0	0	0	0	0	0	0	0	0	3.3911	0	0	0	0
GO:0098660	inorganic ion transmembrane transport	GO:0098660	0	0	0	0	0	0	0	0	0	3.3464	0	4.0186	0	0
GO:0048644	muscle organ morphogenesis	GO:0048644	0	0	0	0	0	0	0	0	0	3.3339	0	0	0	0
GO:0055008	cardiac muscle tissue morphogenesis	GO:0055008	0	0	0	0	0	0	0	0	0	3.3314	0	0	0	0
GO:0014866	skeletal myofibril assembly	GO:0014866	0	0	0	0	0	0	0	0	0	3.2527	0	0	0	0
GO:0006123	mitochondrial electron transport, cytochrome c to oxygen	GO:0006123	0	0	0	0	0	0	0	0	0	3.2527	0	0	0	0
GO:0019646	aerobic electron transport chain	GO:0019646	0	0	0	0	0	0	0	0	0	3.2527	0	0	0	0
GO:2001014	regulation of skeletal muscle cell differentiation	GO:2001014	0	0	0	0	0	0	0	0	0	3.2527	0	0	0	0
GO:0006122	mitochondrial electron transport, ubiquinol to cytochrome c	GO:0006122	0	0	0	0	0	0	0	0	0	3.2527	0	0	0	0
GO:0006086	acetyl-CoA biosynthetic process from pyruvate	GO:0006086	0	0	0	0	0	0	0	0	0	3.2527	0	0	0	0
GO:0007010	cytoskeleton organization	GO:0007010	0	0	0	0	0	0	0	0	0	3.24	0	0	0	0
GO:0060047	heart contraction	GO:0060047	0	0	0	0	0	0	0	0	0	3.1588	0	0	0	0
GO:0006936	muscle contraction	GO:0006936	0	0	0	0	0	0	0	0	0	2.9984	0	0	0	0
GO:0010822	positive regulation of mitochondrion organization	GO:0010822	0	0	0	0	0	0	0	0	0	2.9662	0	0	0	0
GO:0140053	mitochondrial gene expression	GO:0140053	0	0	0	0	0	0	0	0	0	2.9383	0	0	0	0
GO:0045663	positive regulation of myoblast differentiation	GO:0045663	0	0	0	0	0	0	0	0	0	2.9133	0	0	0	0
GO:0003015	heart process	GO:0003015	0	0	0	0	0	0	0	0	0	2.8286	0	0	0	0
GO:0097435	supramolecular fiber organization	GO:0097435	0	0	0	0	0	0	0	0	0	2.7967	0	0	0	0
GO:0033866	nucleoside bisphosphate biosynthetic process	GO:0033866	0	0	0	0	0	0	0	0	0	2.7768	0	0	0	0
GO:0034030	ribonucleoside bisphosphate biosynthetic process	GO:0034030	0	0	0	0	0	0	0	0	0	2.7768	0	0	0	0
GO:0034033	purine nucleoside bisphosphate biosynthetic process	GO:0034033	0	0	0	0	0	0	0	0	0	2.7768	0	0	0	0
GO:0008637	apoptotic mitochondrial changes	GO:0008637	0	0	0	0	0	0	0	0	0	2.7701	0	0	0	0
GO:0045444	fat cell differentiation	GO:0045444	0	0	0	0	0	0	0	0	0	0	5.9498	0	0	0
GO:1901700	response to oxygen-containing compound	GO:1901700	0	0	0	0	0	0	0	0	0	0	5.8738	0	0	0
GO:0050873	brown fat cell differentiation	GO:0050873	0	0	0	0	0	0	0	0	0	0	4.0698	0	0	0
GO:1901568	fatty acid derivative metabolic process	GO:1901568	0	0	0	0	0	0	0	0	0	0	3.6235	0	0	0
GO:0045598	regulation of fat cell differentiation	GO:0045598	0	0	0	0	0	0	0	0	0	0	3.6009	0	0	0
GO:0051239	regulation of multicellular organismal process	GO:0051239	0	0	0	0	0	0	0	0	0	0	3.5246	0	0	0
GO:0007268	chemical synaptic transmission	GO:0007268	0	0	0	0	0	0	0	0	0	0	0	10.5558	10.7808	10.578
GO:0098916	anterograde trans-synaptic signaling	GO:0098916	0	0	0	0	0	0	0	0	0	0	0	10.5558	10.7808	10.578
GO:0099537	trans-synaptic signaling	GO:0099537	0	0	0	0	0	0	0	0	0	0	0	10.4756	10.7003	10.4848
GO:0099536	synaptic signaling	GO:0099536	0	0	0	0	0	0	0	0	0	0	0	10.3965	10.6209	10.3929
GO:0060078	regulation of postsynaptic membrane potential	GO:0060078	0	0	0	0	0	0	0	0	0	0	0	9.5775	7.9815	8.238
GO:0006836	neurotransmitter transport	GO:0006836	0	0	0	0	0	0	0	0	0	0	0	8.9728	11.6117	7.0595
GO:0042391	regulation of membrane potential	GO:0042391	0	0	0	0	0	0	0	0	0	0	0	8.2622	5.47	7.1253
GO:0001505	regulation of neurotransmitter levels	GO:0001505	0	0	0	0	0	0	0	0	0	0	0	8.0208	10.3432	6.875
GO:0097479	synaptic vesicle localization	GO:0097479	0	0	0	0	0	0	0	0	0	0	0	7.403	10.1762	7.0608
GO:0099504	synaptic vesicle cycle	GO:0099504	0	0	0	0	0	0	0	0	0	0	0	7.403	10.1762	5.9638
GO:0030182	neuron differentiation	GO:0030182	0	0	0	0	0	0	0	0	0	0	0	7.1679	5.3847	8.4453
GO:0007269	neurotransmitter secretion	GO:0007269	0	0	0	0	0	0	0	0	0	0	0	6.9671	9.8495	6.8366
GO:0099643	signal release from synapse	GO:0099643	0	0	0	0	0	0	0	0	0	0	0	6.9671	9.8495	6.8366
GO:0007399	nervous system development	GO:0007399	0	0	0	0	0	0	0	0	0	0	0	6.878	5.9907	10.7844
GO:0048699	generation of neurons	GO:0048699	0	0	0	0	0	0	0	0	0	0	0	6.8598	5.1884	8.4179
GO:1902476	chloride transmembrane transport	GO:1902476	0	0	0	0	0	0	0	0	0	0	0	6.3166	3.5993	4.0631
GO:0022008	neurogenesis	GO:0022008	0	0	0	0	0	0	0	0	0	0	0	6.3105	4.7377	7.6784
GO:0048489	synaptic vesicle transport	GO:0048489	0	0	0	0	0	0	0	0	0	0	0	6.3079	8.9705	6.0939
GO:0097480	establishment of synaptic vesicle localization	GO:0097480	0	0	0	0	0	0	0	0	0	0	0	6.3079	8.9705	6.0939
GO:0007267	cell-cell signaling	GO:0007267	0	0	0	0	0	0	0	0	0	0	0	6.0833	5.0395	6.0925
GO:0016079	synaptic vesicle exocytosis	GO:0016079	0	0	0	0	0	0	0	0	0	0	0	5.971	8.7849	5.9822
GO:0098661	inorganic anion transmembrane transport	GO:0098661	0	0	0	0	0	0	0	0	0	0	0	5.908	3.3556	3.7496
GO:0006821	chloride transport	GO:0006821	0	0	0	0	0	0	0	0	0	0	0	5.7276	3.247	3.611
GO:0099003	vesicle-mediated transport in synapse	GO:0099003	0	0	0	0	0	0	0	0	0	0	0	5.671	8.1266	5.3838
GO:0051648	vesicle localization	GO:0051648	0	0	0	0	0	0	0	0	0	0	0	5.6111	7.8679	5.1006
GO:0098693	regulation of synaptic vesicle cycle	GO:0098693	0	0	0	0	0	0	0	0	0	0	0	5.5602	7.0482	5.8132
GO:0015698	inorganic anion transport	GO:0015698	0	0	0	0	0	0	0	0	0	0	0	5.4718	3.3578	3.4184
GO:0048666	neuron development	GO:0048666	0	0	0	0	0	0	0	0	0	0	0	5.3168	4.8294	7.3071
GO:0017156	calcium ion regulated exocytosis	GO:0017156	0	0	0	0	0	0	0	0	0	0	0	5.254	7.797	6.2294
GO:0065008	regulation of biological quality	GO:0065008	0	0	0	0	0	0	0	0	0	0	0	5.2113	6.0825	3.6718
GO:0098656	anion transmembrane transport	GO:0098656	0	0	0	0	0	0	0	0	0	0	0	4.9946	0	0
GO:0050804	modulation of chemical synaptic transmission	GO:0050804	0	0	0	0	0	0	0	0	0	0	0	4.9903	6.0584	5.2482
GO:0099177	regulation of trans-synaptic signaling	GO:0099177	0	0	0	0	0	0	0	0	0	0	0	4.9903	6.0584	5.2482
GO:0051588	regulation of neurotransmitter transport	GO:0051588	0	0	0	0	0	0	0	0	0	0	0	4.8681	6.2039	4.9924
GO:0007186	G protein-coupled receptor signaling pathway	GO:0007186	0	0	0	0	0	0	0	0	0	0	0	4.7228	3.6465	6.1002
GO:0051650	establishment of vesicle localization	GO:0051650	0	0	0	0	0	0	0	0	0	0	0	4.7092	6.8564	4.3263
GO:0046928	regulation of neurotransmitter secretion	GO:0046928	0	0	0	0	0	0	0	0	0	0	0	4.7005	6.1832	5.1266
GO:1902803	regulation of synaptic vesicle transport	GO:1902803	0	0	0	0	0	0	0	0	0	0	0	4.7005	6.1832	5.1266
GO:2000300	regulation of synaptic vesicle exocytosis	GO:2000300	0	0	0	0	0	0	0	0	0	0	0	4.7005	6.1832	5.1266
GO:0060079	excitatory postsynaptic potential	GO:0060079	0	0	0	0	0	0	0	0	0	0	0	4.6535	4.7067	0
GO:0099565	chemical synaptic transmission, postsynaptic	GO:0099565	0	0	0	0	0	0	0	0	0	0	0	4.6535	4.7067	0
GO:0023061	signal release	GO:0023061	0	0	0	0	0	0	0	0	0	0	0	4.206	5.1151	4.0917
GO:0031175	neuron projection development	GO:0031175	0	0	0	0	0	0	0	0	0	0	0	4.0699	4.2118	6.3799
GO:0017158	regulation of calcium ion-dependent exocytosis	GO:0017158	0	0	0	0	0	0	0	0	0	0	0	3.9205	5.1984	5.29
GO:0035249	synaptic transmission, glutamatergic	GO:0035249	0	0	0	0	0	0	0	0	0	0	0	3.8583	3.8983	3.3644
GO:0006835	dicarboxylic acid transport	GO:0006835	0	0	0	0	0	0	0	0	0	0	0	3.6855	0	0
GO:0045055	regulated exocytosis	GO:0045055	0	0	0	0	0	0	0	0	0	0	0	3.5757	5.5024	4.0458
GO:0030030	cell projection organization	GO:0030030	0	0	0	0	0	0	0	0	0	0	0	3.5401	4.2421	5.2514
GO:0050808	synapse organization	GO:0050808	0	0	0	0	0	0	0	0	0	0	0	3.3762	4.3123	3.0681
GO:0007214	gamma-aminobutyric acid signaling pathway	GO:0007214	0	0	0	0	0	0	0	0	0	0	0	3.3298	0	4.287
GO:0017157	regulation of exocytosis	GO:0017157	0	0	0	0	0	0	0	0	0	0	0	0	4.9478	3.6565
GO:0006887	exocytosis	GO:0006887	0	0	0	0	0	0	0	0	0	0	0	0	4.8195	3.2977
GO:0051656	establishment of organelle localization	GO:0051656	0	0	0	0	0	0	0	0	0	0	0	0	4.2398	0
GO:1903305	regulation of regulated secretory pathway	GO:1903305	0	0	0	0	0	0	0	0	0	0	0	0	4.1496	4.0672
GO:0016082	synaptic vesicle priming	GO:0016082	0	0	0	0	0	0	0	0	0	0	0	0	3.8983	0
GO:0051640	organelle localization	GO:0051640	0	0	0	0	0	0	0	0	0	0	0	0	3.8443	0
GO:0120036	plasma membrane bounded cell projection organization	GO:0120036	0	0	0	0	0	0	0	0	0	0	0	0	3.8032	4.8827
GO:0060627	regulation of vesicle-mediated transport	GO:0060627	0	0	0	0	0	0	0	0	0	0	0	0	3.589	0
GO:0046903	secretion	GO:0046903	0	0	0	0	0	0	0	0	0	0	0	0	3.5002	0
GO:0061564	axon development	GO:0061564	0	0	0	0	0	0	0	0	0	0	0	0	3.3009	6.2695
GO:0030534	adult behavior	GO:0030534	0	0	0	0	0	0	0	0	0	0	0	0	3.2128	4.1652
GO:0007628	adult walking behavior	GO:0007628	0	0	0	0	0	0	0	0	0	0	0	0	0	6.4846
GO:0050877	nervous system process	GO:0050877	0	0	0	0	0	0	0	0	0	0	0	0	0	6.1106
GO:0090659	walking behavior	GO:0090659	0	0	0	0	0	0	0	0	0	0	0	0	0	5.9533
GO:0007409	axonogenesis	GO:0007409	0	0	0	0	0	0	0	0	0	0	0	0	0	5.2808
GO:0007417	central nervous system development	GO:0007417	0	0	0	0	0	0	0	0	0	0	0	0	0	5.1977
GO:0048812	neuron projection morphogenesis	GO:0048812	0	0	0	0	0	0	0	0	0	0	0	0	0	5.0024
GO:0048858	cell projection morphogenesis	GO:0048858	0	0	0	0	0	0	0	0	0	0	0	0	0	4.8505
GO:0120039	plasma membrane bounded cell projection morphogenesis	GO:0120039	0	0	0	0	0	0	0	0	0	0	0	0	0	4.8505
GO:0007600	sensory perception	GO:0007600	0	0	0	0	0	0	0	0	0	0	0	0	0	4.7584
GO:0007218	neuropeptide signaling pathway	GO:0007218	0	0	0	0	0	0	0	0	0	0	0	0	0	4.7263
GO:0007626	locomotory behavior	GO:0007626	0	0	0	0	0	0	0	0	0	0	0	0	0	4.7227
GO:0032990	cell part morphogenesis	GO:0032990	0	0	0	0	0	0	0	0	0	0	0	0	0	4.6103
GO:0007610	behavior	GO:0007610	0	0	0	0	0	0	0	0	0	0	0	0	0	4.3416
GO:0048667	cell morphogenesis involved in neuron differentiation	GO:0048667	0	0	0	0	0	0	0	0	0	0	0	0	0	4.0445
GO:0051932	synaptic transmission, GABAergic	GO:0051932	0	0	0	0	0	0	0	0	0	0	0	0	0	3.7553
GO:0021536	diencephalon development	GO:0021536	0	0	0	0	0	0	0	0	0	0	0	0	0	3.7496
GO:0008344	adult locomotory behavior	GO:0008344	0	0	0	0	0	0	0	0	0	0	0	0	0	3.4824
GO:0019233	sensory perception of pain	GO:0019233	0	0	0	0	0	0	0	0	0	0	0	0	0	3.4824
GO:0015872	dopamine transport	GO:0015872	0	0	0	0	0	0	0	0	0	0	0	0	0	3.3644
GO:0051960	regulation of nervous system development	GO:0051960	0	0	0	0	0	0	0	0	0	0	0	0	0	3.2773
GO:0010001	glial cell differentiation	GO:0010001	0	0	0	0	0	0	0	0	0	0	0	0	0	3.2002
GO:0015696	ammonium transport	GO:0015696	0	0	0	0	0	0	0	0	0	0	0	0	0	3.1447
GO:0072347	response to anesthetic	GO:0072347	0	0	0	0	0	0	0	0	0	0	0	0	0	3.075
GO:0048169	regulation of long-term neuronal synaptic plasticity	GO:0048169	0	0	0	0	0	0	0	0	0	0	0	0	0	3.075
Jejunum
geneSet	description	link	size	overlap	expect	enrichmentRatio	pValue	FDR	overlapId	userId
GO:0046835	carbohydrate phosphorylation	http://amigo.geneontology.org/amigo/term/GO:0046835	7	3	0.138889	21.6	0.000248651	0.93255	100153520;100520121;100523241	HKDC1;KHK;TKFC
GO:0043171	peptide catabolic process	http://amigo.geneontology.org/amigo/term/GO:0043171	8	3	0.15873	18.9	0.000392157	0.93255	397080;397520;100152688	ANPEP;ENPEP;XPNPEP1
GO:0006508	proteolysis	http://amigo.geneontology.org/amigo/term/GO:0006508	425	17	8.43254	2.016	0.00335204	1	397080;397152;397196;397244;397320;397520;445518;100152688;100155714;100157591;100511084;100516141;100516921;100517293;100607966;100621642;100622575	TMPRSS15;MEP1B;SPINK1;ANPEP;CASP6;ENPEP;SPAI-2;SPAI-2;PEPD;XPNPEP1;MMP3;ENSSSCG00000023127;CASP3;DPEP1;PLGRKT;PM20D2;ENSSSCG00000009138
GO:0007263	nitric oxide mediated signal transduction	http://amigo.geneontology.org/amigo/term/GO:0007263	7	2	0.138889	14.4	0.00765393	1	397288;100622575	PDX1;SPINK1
GO:0032094	response to food	http://amigo.geneontology.org/amigo/term/GO:0032094	9	2	0.178571	11.2	0.0127873	1	397407;445524	GAST;CLPS
GO:0071242	cellular response to ammonium ion	http://amigo.geneontology.org/amigo/term/GO:0071242	10	2	0.198413	10.08	0.01578	1	733588;100517293	CASP6;GNA11
GO:0006767	water-soluble vitamin metabolic process	http://amigo.geneontology.org/amigo/term/GO:0006767	12	2	0.238095	8.4	0.0225579	1	397246;100157591	VNN1;PM20D2
GO:0060359	response to ammonium ion	http://amigo.geneontology.org/amigo/term/GO:0060359	14	2	0.277778	7.2	0.0303174	1	733588;100517293	CASP6;GNA11
GO:0048066	developmental pigmentation	http://amigo.geneontology.org/amigo/term/GO:0048066	15	2	0.297619	6.72	0.0345382	1	606748;100621853	RAB38;SLC45A2
GO:0043603	cellular amide metabolic process	http://amigo.geneontology.org/amigo/term/GO:0043603	306	11	6.07143	1.81176	0.0375105	1	397080;397244;397246;397438;397520;397682;100152688;100155265;100157591;100622027;100738416	ANPEP;ENPEP;XPNPEP1;OTC;VNN1;CASP3;RPS27L;SEPSECS;PM20D2;GSTA1;GAL3ST1
Duodenum
geneSet	description	link	size	overlap	expect	enrichmentRatio	pValue	FDR	overlapId	userId
GO:0046835	carbohydrate phosphorylation	http://amigo.geneontology.org/amigo/term/GO:0046835	7	4	0.203125	19.6923	2.20459e-05	0.102503	100153520;100520121;100521514;100523241	HKDC1;KHK;TKFC;GALK1
GO:0043171	peptide catabolic process	http://amigo.geneontology.org/amigo/term/GO:0043171	8	4	0.232143	17.2308	4.31045e-05	0.102503	397080;397095;397520;100152688	ANPEP;XPNPEP1;ENPEP;ENSSSCG00000010056
GO:0048878	chemical homeostasis	http://amigo.geneontology.org/amigo/term/GO:0048878	258	18	7.48661	2.40429	0.000375451	0.475826	396728;397288;397381;397438;397649;397691;403154;414377;449524;497623;503660;100153520;100156133;100156896;100156914;100514770;100522692;100621853	PDX1;MTTP;RAB38;HKDC1;CCR9;SLC35G1;OTC;GHRL;BDH2;SLC24A4;BPIFA1;SLC39A4;LTF;SLC30A1;ATP2C2;P2RX7;APOA1;CFTR
GO:0046365	monosaccharide catabolic process	http://amigo.geneontology.org/amigo/term/GO:0046365	6	3	0.174107	17.2308	0.000446912	0.475826	396924;399536;100521514	GALM;GALK1;AKR1A1
GO:0006811	ion transport	http://amigo.geneontology.org/amigo/term/GO:0006811	359	22	10.4174	2.11185	0.000504654	0.475826	397186;397376;397381;397624;397649;397691;403154;445519;449524;497623;503660;641346;100151780;100152597;100156133;100156896;100156914;100514770;100519011;100621502;100622575;100623809	SLC5A12;SLC6A19;SLC15A1;MTTP;SPINK1;KCNJ13;ENSSSCG00000012049;SLC35G1;PLA2G12B;SLC31A1;SLC24A4;TMC5;BPIFA1;SLC39A4;SLC5A4;LTF;SLC30A1;ENSSSCG00000005908;ATP2C2;P2RX7;APOA1;CFTR
GO:0005975	carbohydrate metabolic process	http://amigo.geneontology.org/amigo/term/GO:0005975	139	12	4.03348	2.9751	0.000600285	0.475826	396924;397074;397117;397288;399536;497623;100153520;100511064;100520121;100521514;100523241;100627480	PDX1;HKDC1;SPAM1;GALM;KHK;TKFC;GALK1;AKR1A1;TFF3;P2RX7;CHID1;GSTO1
GO:0009070	serine family amino acid biosynthetic process	http://amigo.geneontology.org/amigo/term/GO:0009070	7	3	0.203125	14.7692	0.000765562	0.495721	397095;733654;100621901	DCTPP1;ENSSSCG00000010056;CTH
GO:0055080	cation homeostasis	http://amigo.geneontology.org/amigo/term/GO:0055080	149	12	4.32366	2.77543	0.00111814	0.495721	396728;397649;403154;414377;497623;503660;100156133;100156896;100156914;100514770;100522692;100621853	RAB38;CCR9;SLC35G1;GHRL;BDH2;SLC24A4;SLC39A4;LTF;SLC30A1;ATP2C2;P2RX7;CFTR
GO:0098771	inorganic ion homeostasis	http://amigo.geneontology.org/amigo/term/GO:0098771	150	12	4.35268	2.75692	0.00118592	0.495721	396728;397649;403154;414377;497623;503660;100156133;100156896;100156914;100514770;100522692;100621853	RAB38;CCR9;SLC35G1;GHRL;BDH2;SLC24A4;SLC39A4;LTF;SLC30A1;ATP2C2;P2RX7;CFTR
GO:0042219	cellular modified amino acid catabolic process	http://amigo.geneontology.org/amigo/term/GO:0042219	8	3	0.232143	12.9231	0.00119904	0.495721	397095;100157591;100524456	ENSSSCG00000010056;ENSSSCG00000009523;PM20D2
Ileum
geneSet	description	link	size	overlap	expect	enrichmentRatio	pValue	FDR	overlapId	userId
GO:0043171	peptide catabolic process	http://amigo.geneontology.org/amigo/term/GO:0043171	8	3	0.107143	28	0.000121319	0.576991	397080;397520;100152688	ENPEP;XPNPEP1;ANPEP
GO:0006508	proteolysis	http://amigo.geneontology.org/amigo/term/GO:0006508	425	13	5.69196	2.28392	0.00319377	1	397080;397152;397196;397320;397520;445518;445538;100152688;100511084;100516141;100517293;100607966;100622575	TMPRSS15;MEP1B;ENPEP;XPNPEP1;ANPEP;SPAI-2;SPAI-2;SPINK1;PEPD;DPEP1;CASP6;MMP3;XPNPEP2
GO:0051926	negative regulation of calcium ion transport	http://amigo.geneontology.org/amigo/term/GO:0051926	11	2	0.147321	13.5758	0.008963	1	397249;100622575	SPINK1;EPO
GO:0010466	negative regulation of peptidase activity	http://amigo.geneontology.org/amigo/term/GO:0010466	66	4	0.883929	4.52525	0.0112151	1	397196;445518;100607966;100622575	SPAI-2;SPAI-2;SPINK1;DPEP1
GO:0042531	positive regulation of tyrosine phosphorylation of STAT protein	http://amigo.geneontology.org/amigo/term/GO:0042531	15	2	0.200893	9.95556	0.0165355	1	396868;397249	IL2;EPO
GO:0048066	developmental pigmentation	http://amigo.geneontology.org/amigo/term/GO:0048066	15	2	0.200893	9.95556	0.0165355	1	606748;100621853	RAB38;SLC45A2
GO:0010469	regulation of signaling receptor activity	http://amigo.geneontology.org/amigo/term/GO:0010469	157	6	2.10268	2.8535	0.0174534	1	396674;396868;397249;397466;445524;448799	RETN;ENSSSCG00000013593;GAST;ENSSSCG00000001521;IL2;EPO
GO:0042509	regulation of tyrosine phosphorylation of STAT protein	http://amigo.geneontology.org/amigo/term/GO:0042509	19	2	0.254464	7.85965	0.0260265	1	396868;397249	IL2;EPO
GO:0046427	positive regulation of JAK-STAT cascade	http://amigo.geneontology.org/amigo/term/GO:0046427	19	2	0.254464	7.85965	0.0260265	1	396868;397249	IL2;EPO
GO:1904894	positive regulation of STAT cascade	http://amigo.geneontology.org/amigo/term/GO:1904894	19	2	0.254464	7.85965	0.0260265	1	396868;397249	IL2;EPO
Colon
geneSet	description	link	size	overlap	expect	enrichmentRatio	pValue	FDR	overlapId	userId
GO:0009954	proximal/distal pattern formation	http://amigo.geneontology.org/amigo/term/GO:0009954	6	3	0.0982143	30.5455	8.09223e-05	0.221877	100519066;100521236;100620451	HOXA11;HOXA10;ENSSSCG00000028997
GO:0051983	regulation of chromosome segregation	http://amigo.geneontology.org/amigo/term/GO:0051983	30	5	0.491071	10.1818	0.000104718	0.221877	397266;100516205;100517749;100518832;100522031	BIRC5;RMI2;CDC6;FEN1;KIF2C
GO:0060065	uterus development	http://amigo.geneontology.org/amigo/term/GO:0060065	7	3	0.114583	26.1818	0.000139956	0.221877	100519066;100521236;100620451	HOXA11;HOXA10;ENSSSCG00000028997
GO:0051346	negative regulation of hydrolase activity	http://amigo.geneontology.org/amigo/term/GO:0051346	108	8	1.76786	4.52525	0.000322735	0.321166	396757;396866;396867;396987;397266;100158201;100519286;100621371	ENSSSCG00000035053;SERPINB2;WFDC2;BIRC5;CHP1;CSTA;CSTA;PPP1R14D
GO:0010951	negative regulation of endopeptidase activity	http://amigo.geneontology.org/amigo/term/GO:0010951	61	6	0.998512	6.00894	0.000418954	0.321166	396757;396866;396867;396987;397266;100519286	ENSSSCG00000035053;SERPINB2;WFDC2;BIRC5;CSTA;CSTA
GO:0098813	nuclear chromosome segregation	http://amigo.geneontology.org/amigo/term/GO:0098813	61	6	0.998512	6.00894	0.000418954	0.321166	397266;100153950;100516205;100517749;100518832;100522031	BIRC5;RMI2;CDC6;FEN1;BAG6;KIF2C
GO:0043270	positive regulation of ion transport	http://amigo.geneontology.org/amigo/term/GO:0043270	42	5	0.6875	7.27273	0.000537149	0.321166	396927;397595;100156799;100169744;100621371	ZP3;CXCL11;GCG;CHP1;COX17
GO:0033045	regulation of sister chromatid segregation	http://amigo.geneontology.org/amigo/term/GO:0033045	24	4	0.392857	10.1818	0.000544033	0.321166	397266;100517749;100518832;100522031	BIRC5;RMI2;CDC6;FEN1
GO:0010466	negative regulation of peptidase activity	http://amigo.geneontology.org/amigo/term/GO:0010466	66	6	1.08036	5.55372	0.000643058	0.321166	396757;396866;396867;396987;397266;100519286	ENSSSCG00000035053;SERPINB2;WFDC2;BIRC5;CSTA;CSTA
GO:0045861	negative regulation of proteolysis	http://amigo.geneontology.org/amigo/term/GO:0045861	93	7	1.52232	4.59824	0.000711095	0.321166	396757;396866;396867;396987;397266;100153950;100519286	ENSSSCG00000035053;SERPINB2;WFDC2;BIRC5;CSTA;CSTA;BAG6
Cecum
geneSet	description	link	size	overlap	expect	enrichmentRatio	pValue	FDR	overlapId	userId
GO:0009952	anterior/posterior pattern specification	http://amigo.geneontology.org/amigo/term/GO:0009952	45	8	1.36161	5.87541	4.70508e-05	0.172983	100157103;100499568;100515975;100519058;100519066;100521236;100522513;100620451	HOXA10;HOXA11;ENSSSCG00000028997;HOXD3;BMP2;HOXB7;FZD5;HOXA5
GO:0007389	pattern specification process	http://amigo.geneontology.org/amigo/term/GO:0007389	77	10	2.32986	4.2921	8.7724e-05	0.172983	100156502;100157103;100157709;100499568;100515975;100519058;100519066;100521236;100522513;100620451	HOXA10;HOXA11;ENSSSCG00000028997;HOXD3;FOXA1;BMP2;AP1B1;HOXB7;FZD5;HOXA5
GO:0061138	morphogenesis of a branching epithelium	http://amigo.geneontology.org/amigo/term/GO:0061138	52	8	1.57341	5.08449	0.000137539	0.172983	397668;100156502;100157103;100499568;100517843;100519058;100521236;100522513	AREG;HOXA11;FOXA1;BMP2;HOXB7;FZD5;HOXA5;ST14
GO:0003002	regionalization	http://amigo.geneontology.org/amigo/term/GO:0003002	67	9	2.02728	4.43944	0.000153957	0.172983	100156502;100157103;100499568;100515975;100519058;100519066;100521236;100522513;100620451	HOXA10;HOXA11;ENSSSCG00000028997;HOXD3;FOXA1;BMP2;HOXB7;FZD5;HOXA5
GO:0061448	connective tissue development	http://amigo.geneontology.org/amigo/term/GO:0061448	55	8	1.66419	4.80715	0.000206239	0.172983	397297;404698;493772;100156502;100157103;100499568;100515975;100521236	HOXA11;HYAL1;HOXD3;FOXA1;PPARD;BMP2;NPPC;HOXA5
GO:0001763	morphogenesis of a branching structure	http://amigo.geneontology.org/amigo/term/GO:0001763	56	8	1.69444	4.72131	0.000234593	0.172983	397668;100156502;100157103;100499568;100517843;100519058;100521236;100522513	AREG;HOXA11;FOXA1;BMP2;HOXB7;FZD5;HOXA5;ST14
GO:0071695	anatomical structure maturation	http://amigo.geneontology.org/amigo/term/GO:0071695	43	7	1.30109	5.3801	0.0002546	0.172983	397379;493772;574063;100152302;100156502;100157103;100499568	TMEM79;FOXA1;BMP2;CDC20;ENSSSCG00000007493;NPPC;HOXA5
GO:0032414	positive regulation of ion transmembrane transporter activity	http://amigo.geneontology.org/amigo/term/GO:0032414	6	3	0.181548	16.5246	0.000505791	0.240554	100156799;100171399;100621371	COX17;CHP1;STIM1
GO:0009954	proximal/distal pattern formation	http://amigo.geneontology.org/amigo/term/GO:0009954	6	3	0.181548	16.5246	0.000505791	0.240554	100519066;100521236;100620451	HOXA10;HOXA11;ENSSSCG00000028997
GO:0002070	epithelial cell maturation	http://amigo.geneontology.org/amigo/term/GO:0002070	6	3	0.181548	16.5246	0.000505791	0.240554	100152302;100156502;100499568	TMEM79;FOXA1;HOXA5
Stomach
geneSet	description	link	size	overlap	expect	enrichmentRatio	pValue	FDR	overlapId	userId
GO:0048513	animal organ development	http://amigo.geneontology.org/amigo/term/GO:0048513	654	29	13.7872	2.1034	3.43053e-05	0.0970014	396571;396836;397225;397260;397430;404696;654328;733615;100151956;100152419;100153106;100153257;100153983;100154258;100155478;100155623;100155958;100155995;100156161;100310807;100516558;100517009;100518493;100519993;100521111;100522700;100524846;100623256;100737774	RCN3;LIMS2;RAB23;NR2F2;MYOCD;FRZB;LEPR;MMP16;PLCD3;CD109;MET;ACTA2;TBX19;HOXA2;RRAS;IFN-DELTA-1;IL4;NFIB;LRRC17;TSPAN2;PHEX;BVES;SMAD3;COL8A1;ILK;SRF;SART1;HOXB5;IFRD2
GO:0001501	skeletal system development	http://amigo.geneontology.org/amigo/term/GO:0001501	101	10	2.12922	4.69656	4.07912e-05	0.0970014	397260;404696;100152419;100153257;100155623;100155958;100155995;100519993;100522700;100737774	RAB23;FRZB;MMP16;HOXA2;NFIB;LRRC17;SMAD3;SRF;HOXB5;IFRD2
GO:0032501	multicellular organismal process	http://amigo.geneontology.org/amigo/term/GO:0032501	1302	44	27.4479	1.60304	0.000133514	0.205507	396571;396721;396786;396811;396836;397225;397260;397430;397434;397632;404696;654328;733615;733617;100037999;100151956;100152419;100153106;100153257;100153273;100153503;100153983;100154258;100155478;100155623;100155958;100155995;100156161;100156548;100310807;100513556;100516558;100517009;100518493;100519993;100521111;100522700;100524846;100526242;100620992;100621355;100622531;100623256;100737774	RCN3;LIMS2;SLC9A4;RAB23;SIAH2;MXRA8;NR2F2;MYOCD;MPZ;FRZB;KCNMA1;LEPR;MMP16;PLCD3;CAVIN3;CD109;MET;ACTA2;P3H4;TBX19;HOXA2;ZHX3;MCAM;RRAS;PLCZ1;ENSSSCG00000028635;IFN-DELTA-1;IL4;NFIB;TPM1;LRRC17;TSPAN2;PHEX;MMP11;IL13;BVES;SMAD3;COL8A1;ILK;PTGER3;SRF;SART1;HOXB5;IFRD2
GO:0032502	developmental process	http://amigo.geneontology.org/amigo/term/GO:0032502	1158	40	24.4122	1.63852	0.000223306	0.205507	396571;396786;396836;397225;397260;397430;397632;404696;654328;733615;733617;100144521;100151956;100152184;100152419;100153106;100153257;100153273;100153503;100153983;100154258;100155478;100155623;100155958;100155995;100156161;100156548;100310807;100510975;100516558;100517009;100518493;100519993;100521111;100522700;100524846;100621355;100622531;100623256;100737774	RCN3;LIMS2;SLC9A4;RAB23;SIAH2;MXRA8;PLEKHO1;NR2F2;MYOCD;MPZ;FRZB;LEPR;MMP16;PLCD3;CD109;MET;ACTA2;TBX19;HOXA2;ZHX3;MCAM;RRAS;PLCZ1;IFN-DELTA-1;IL4;EGFL8;NFIB;LRRC17;TSPAN2;PHEX;MMP11;CCDC3;BVES;SMAD3;COL8A1;ILK;SRF;SART1;HOXB5;IFRD2
GO:0009888	tissue development	http://amigo.geneontology.org/amigo/term/GO:0009888	381	19	8.03199	2.36554	0.000262125	0.205507	396571;396786;397225;397260;397430;404696;654328;733615;100152419;100153106;100153983;100154258;100155478;100155958;100155995;100518493;100522700;100623256;100737774	RCN3;SLC9A4;NR2F2;MYOCD;FRZB;CD109;MET;ACTA2;IL4;NFIB;LRRC17;PHEX;BVES;SMAD3;COL8A1;ILK;SRF;HOXB5;IFRD2
GO:0007275	multicellular organism development	http://amigo.geneontology.org/amigo/term/GO:0007275	964	35	20.3224	1.72224	0.00027698	0.205507	396571;396836;397225;397260;397430;397632;404696;654328;733615;733617;100151956;100152419;100153106;100153257;100153273;100153503;100153983;100154258;100155478;100155623;100155958;100155995;100156161;100310807;100516558;100517009;100518493;100519993;100521111;100522700;100524846;100621355;100622531;100623256;100737774	RCN3;LIMS2;RAB23;SIAH2;MXRA8;NR2F2;MYOCD;MPZ;FRZB;LEPR;MMP16;PLCD3;CD109;MET;ACTA2;TBX19;HOXA2;MCAM;RRAS;PLCZ1;IFN-DELTA-1;IL4;NFIB;LRRC17;TSPAN2;PHEX;MMP11;BVES;SMAD3;COL8A1;ILK;SRF;SART1;HOXB5;IFRD2
GO:0048856	anatomical structure development	http://amigo.geneontology.org/amigo/term/GO:0048856	1090	38	22.9787	1.65371	0.00030247	0.205507	396571;396786;396836;397225;397260;397430;397632;404696;654328;733615;733617;100144521;100151956;100152184;100152419;100153106;100153257;100153273;100153503;100153983;100154258;100155478;100155623;100155958;100155995;100156161;100310807;100516558;100517009;100518493;100519993;100521111;100522700;100524846;100621355;100622531;100623256;100737774	RCN3;LIMS2;SLC9A4;RAB23;SIAH2;MXRA8;PLEKHO1;NR2F2;MYOCD;MPZ;FRZB;LEPR;MMP16;PLCD3;CD109;MET;ACTA2;TBX19;HOXA2;MCAM;RRAS;PLCZ1;IFN-DELTA-1;IL4;EGFL8;NFIB;LRRC17;TSPAN2;PHEX;MMP11;BVES;SMAD3;COL8A1;ILK;SRF;SART1;HOXB5;IFRD2
GO:0030855	epithelial cell differentiation	http://amigo.geneontology.org/amigo/term/GO:0030855	134	10	2.8249	3.53995	0.000438831	0.237455	396786;397225;397260;654328;733615;100152419;100153983;100155478;100155995;100522700	SLC9A4;NR2F2;FRZB;CD109;MET;ACTA2;IL4;NFIB;SMAD3;HOXB5
GO:0006939	smooth muscle contraction	http://amigo.geneontology.org/amigo/term/GO:0006939	18	4	0.379464	10.5412	0.000449347	0.237455	396811;397434;733615;100155958	KCNMA1;ACTA2;PTGER3;SRF
GO:0048731	system development	http://amigo.geneontology.org/amigo/term/GO:0048731	877	32	18.4883	1.73082	0.000548355	0.242158	396571;396836;397225;397260;397430;404696;654328;733615;733617;100151956;100152419;100153106;100153257;100153273;100153983;100154258;100155478;100155623;100155958;100155995;100156161;100310807;100516558;100517009;100518493;100519993;100521111;100522700;100524846;100621355;100623256;100737774	RCN3;LIMS2;RAB23;MXRA8;NR2F2;MYOCD;MPZ;FRZB;LEPR;MMP16;PLCD3;CD109;MET;ACTA2;TBX19;HOXA2;MCAM;RRAS;IFN-DELTA-1;IL4;NFIB;LRRC17;TSPAN2;PHEX;BVES;SMAD3;COL8A1;ILK;SRF;SART1;HOXB5;IFRD2
Liver
geneSet	description	link	size	overlap	expect	enrichmentRatio	pValue	FDR	overlapId	userId
GO:0044281	small molecule metabolic process	http://amigo.geneontology.org/amigo/term/GO:0044281	499	98	41.0883	2.38511	0	0	396614;396688;396759;396784;396799;396841;396857;396916;396924;396932;396937;396949;396950;396963;397036;397038;397065;397072;397115;397117;397132;397133;397134;397148;397189;397246;397371;397396;397419;397438;397444;397576;397586;397621;397673;397678;397681;397687;397691;403124;403216;406187;414382;414411;448964;448982;497050;641359;733636;733654;733683;733685;768107;780404;780405;100134963;1001…	HAO1;CYP2E1;UPB1;ENSSSCG00000009667;ZPR1;ITIH2;APOA2;GC;SULT2A1;ENSSSCG00000003086;QPRT;GSTZ1;BHMT;TDO2;GNMT;HOGA1;TAT;PMVK;ENSSSCG00000021767;CYP2D25;CYP1A2;SLC17A1;DPYS;ASS1;SORD;ECHS1;SLC37A4;GCAT;ITIH4;RGN;ENSSSCG00000032768;ITIH1;GALT;AFP;ARG1;HMGCS2;ENSSSCG00000015069;APOA4;ACAA1;ETFB;TTR;PCBD1;APOE;FBP1;ENSSSCG00000023749;ACADS;ENSSSCG00000007524;ENSSSCG00000005663;GSTO1;PPIF;ACOX2;COASY;I…
GO:0006082	organic acid metabolic process	http://amigo.geneontology.org/amigo/term/GO:0006082	249	67	20.503	3.26782	0	0	396614;396759;396784;396799;396841;396857;396924;396932;396937;396949;396963;397038;397065;397072;397115;397117;397132;397134;397148;397246;397371;397396;397438;397444;397621;397678;397681;397687;403124;403216;406187;414382;414411;448982;497050;641359;733636;733654;768107;780404;100144519;100144529;100144531;100152868;100152910;100153961;100155595;100155919;100156666;100156927;100156930;100286807…	HAO1;CYP2E1;UPB1;ENSSSCG00000009667;ZPR1;ITIH2;SULT2A1;ENSSSCG00000003086;QPRT;GSTZ1;BHMT;TDO2;GNMT;HOGA1;TAT;ENSSSCG00000021767;CYP2D25;CYP1A2;SLC17A1;ASS1;ECHS1;SLC37A4;GCAT;ITIH4;RGN;ITIH1;ARG1;ENSSSCG00000015069;APOA4;ACAA1;ETFB;FBP1;ACADS;ENSSSCG00000005663;GSTO1;ACOX2;IYD;GUSB;BTD;SDS;ACSL1;AHCY;ENSSSCG00000002348;CTH;PHGDH;C3;ACADVL;MTHFD1;PCK1;PTGR1;LDHC;FMO1;KMO;AKR1A1;OTC;FOLR1;BCAT2;RB…
GO:0043436	oxoacid metabolic process	http://amigo.geneontology.org/amigo/term/GO:0043436	244	65	20.0913	3.23524	0	0	396614;396759;396784;396799;396841;396857;396924;396932;396937;396949;396963;397038;397065;397072;397115;397117;397134;397148;397246;397371;397396;397438;397444;397678;397681;397687;403124;403216;406187;414382;414411;448982;497050;641359;733636;733654;768107;780404;100144519;100144529;100144531;100152868;100152910;100153961;100155595;100155919;100156666;100156927;100156930;100286807;100301559;100…	HAO1;CYP2E1;UPB1;ENSSSCG00000009667;ZPR1;ITIH2;SULT2A1;ENSSSCG00000003086;QPRT;GSTZ1;BHMT;TDO2;GNMT;HOGA1;TAT;ENSSSCG00000021767;CYP2D25;CYP1A2;ASS1;ECHS1;SLC37A4;GCAT;ITIH4;RGN;ITIH1;ARG1;ENSSSCG00000015069;APOA4;ACAA1;ETFB;FBP1;ACADS;ENSSSCG00000005663;GSTO1;ACOX2;IYD;GUSB;BTD;SDS;ACSL1;AHCY;ENSSSCG00000002348;CTH;PHGDH;C3;ACADVL;MTHFD1;PCK1;PTGR1;LDHC;KMO;AKR1A1;OTC;FOLR1;BCAT2;RBP1;GPT2;HNF4A…
GO:0019752	carboxylic acid metabolic process	http://amigo.geneontology.org/amigo/term/GO:0019752	238	63	19.5972	3.21474	0	0	396614;396759;396784;396799;396841;396857;396924;396932;396937;396949;396963;397038;397065;397072;397115;397117;397134;397148;397246;397371;397438;397444;397678;397681;397687;403124;403216;406187;414382;414411;448982;497050;733636;733654;768107;780404;100144519;100144529;100144531;100152868;100152910;100153961;100155595;100155919;100156666;100156927;100156930;100286807;100301559;100381252;1005025…	HAO1;CYP2E1;UPB1;ENSSSCG00000009667;ZPR1;ITIH2;ENSSSCG00000003086;QPRT;GSTZ1;BHMT;TDO2;GNMT;HOGA1;TAT;ENSSSCG00000021767;CYP2D25;CYP1A2;ASS1;ECHS1;SLC37A4;GCAT;ITIH4;RGN;ITIH1;ARG1;ENSSSCG00000015069;APOA4;ACAA1;ETFB;FBP1;ACADS;ENSSSCG00000005663;GSTO1;ACOX2;IYD;GUSB;BTD;SDS;ACSL1;AHCY;ENSSSCG00000002348;CTH;PHGDH;C3;ACADVL;MTHFD1;PCK1;PTGR1;LDHC;KMO;AKR1A1;OTC;FOLR1;BCAT2;RBP1;GPT2;HNF4A;DAO;DDC…
GO:0055114	oxidation-reduction process	http://amigo.geneontology.org/amigo/term/GO:0055114	314	68	25.8552	2.63004	6.66134e-15	6.33626e-12	396614;396622;396759;396924;396932;397030;397036;397065;397082;397117;397132;397133;397134;397148;397189;397403;397463;397480;397568;397678;397687;397691;403124;403216;403324;403327;414380;414382;414799;414909;414913;445539;733633;733685;733694;780404;100037965;100126282;100144529;100151982;100152910;100153243;100154744;100154810;100155605;100155687;100156927;100156930;100157935;100158181;1001701…	HAO1;CYP2E1;ENSSSCG00000009667;CYP4A24;FOXRED1;APOA2;TDO2;ENSSSCG00000021767;CYP2D25;CYP1A2;SORD;ECHS1;SLC37A4;GLRX5;DIO1;CYP27A1;ACADSB;GSTK1;ACAA1;ETFB;ENSSSCG00000006719;BLVRB;PCBD1;MSRB1;TM7SF2;HSD11B1;ENSSSCG00000023749;ACADS;GSTO1;ACOX2;DHRS4;CYP3A29;IYD;FMO3;APOA1;FDX1;CCS;KHK;PHGDH;AKR1C2;ENSSSCG00000002462;ALDH2;GPX1;ACADVL;MTHFD1;ENSSSCG00000039731;BLVRA;MAOB;PTGR1;LDHC;SOD1;FMO1;KMO;AK…
GO:0044282	small molecule catabolic process	http://amigo.geneontology.org/amigo/term/GO:0044282	91	30	7.49306	4.00371	8.17058e-12	6.47654e-09	396614;396841;396924;396932;396949;397065;397115;397134;397148;397189;397438;397576;497050;641359;733685;100144519;100144531;100153961;100156927;100158181;100301559;100511756;100515577;100516877;100520636;100525698;100623339;100623908;100626791;100627803	HAO1;SULT2A1;QPRT;GSTZ1;TDO2;HOGA1;TAT;ENSSSCG00000021767;SORD;ECHS1;GCAT;GALT;ARG1;ACAA1;ETFB;APOE;ENSSSCG00000023749;ACADS;ACOX2;GUSB;AHCY;ALDH2;ACADVL;PCK1;KMO;AKR1A1;OTC;BCAT2;DAO;FAAH
GO:0051186	cofactor metabolic process	http://amigo.geneontology.org/amigo/term/GO:0051186	129	36	10.622	3.38918	1.55251e-11	1.05482e-08	396622;396688;396759;396784;396924;396998;397036;397038;397117;397132;397148;397246;397444;397568;397673;397682;407067;414382;497050;768107;780404;780405;100152301;100152868;100152910;100155605;100301559;100511756;100515289;100521318;100521480;100623339;100625219;100626791;100737057;100737727	ENSSSCG00000009667;HPX;QPRT;GSTZ1;TDO2;GNMT;TAT;PMVK;CYP1A2;RGN;HMGCS2;GSTK1;BLVRB;PCBD1;FBP1;GSTO1;COASY;BTD;NAXE;AHCY;ENSSSCG00000002348;GSTA1;MTHFD1;BLVRA;SOD1;FMO1;KMO;AKR1A1;HBM;FOLR1;CAT;GPT2;HBE1;HMOX2;PARK7;VNN1
GO:1901605	alpha-amino acid metabolic process	http://amigo.geneontology.org/amigo/term/GO:1901605	58	23	4.77579	4.81595	3.34208e-11	1.98687e-08	396841;397065;397115;397134;397148;397371;397438;397444;403124;414382;414411;497050;733636;733654;780404;100144529;100153961;100301559;100511756;100515071;100521318;100525698;100626791	GSTZ1;BHMT;TDO2;GNMT;HOGA1;TAT;ENSSSCG00000021767;ASS1;GCAT;ARG1;ENSSSCG00000005663;IYD;AHCY;CTH;PHGDH;MTHFD1;KMO;OTC;BCAT2;GPT2;HNF4A;DAO;PARK7
GO:0016054	organic acid catabolic process	http://amigo.geneontology.org/amigo/term/GO:0016054	65	24	5.35218	4.48415	7.35383e-11	3.49748e-08	396614;396841;396924;396932;396949;397065;397115;397134;397148;397438;497050;100144519;100144531;100153961;100156927;100301559;100511756;100515577;100516877;100520636;100525698;100623339;100626791;100627803	HAO1;QPRT;GSTZ1;TDO2;HOGA1;TAT;ENSSSCG00000021767;ECHS1;GCAT;ARG1;ACAA1;ETFB;ACADS;ACOX2;GUSB;AHCY;ACADVL;PCK1;KMO;AKR1A1;OTC;BCAT2;DAO;FAAH
GO:0046395	carboxylic acid catabolic process	http://amigo.geneontology.org/amigo/term/GO:0046395	65	24	5.35218	4.48415	7.35383e-11	3.49748e-08	396614;396841;396924;396932;396949;397065;397115;397134;397148;397438;497050;100144519;100144531;100153961;100156927;100301559;100511756;100515577;100516877;100520636;100525698;100623339;100626791;100627803	HAO1;QPRT;GSTZ1;TDO2;HOGA1;TAT;ENSSSCG00000021767;ECHS1;GCAT;ARG1;ACAA1;ETFB;ACADS;ACOX2;GUSB;AHCY;ACADVL;PCK1;KMO;AKR1A1;OTC;BCAT2;DAO;FAAH
GO:0006520	cellular amino acid metabolic process	http://amigo.geneontology.org/amigo/term/GO:0006520	80	26	6.5873	3.94699	3.1105e-10	1.34487e-07	396841;396857;397065;397115;397134;397148;397371;397438;397444;403124;414382;414411;497050;733636;733654;780404;100144529;100153961;100155595;100155919;100301559;100511756;100515071;100521318;100525698;100626791	UPB1;GSTZ1;BHMT;TDO2;GNMT;HOGA1;TAT;ENSSSCG00000021767;ASS1;GCAT;ARG1;ENSSSCG00000005663;IYD;SDS;AHCY;CTH;PHGDH;MTHFD1;KMO;OTC;BCAT2;GPT2;HNF4A;DAO;DDC;PARK7
GO:1901615	organic hydroxy compound metabolic process	http://amigo.geneontology.org/amigo/term/GO:1901615	118	32	9.71627	3.29344	5.11809e-10	2.02847e-07	396857;397036;397133;397189;397419;397576;397673;397681;397691;403124;414380;448964;641359;733685;780404;100144531;100152301;100153243;100155530;100155605;100156666;100158181;100233182;100286807;100312968;100514510;100515577;100516688;100520121;100520636;100522057;100627803	HAO1;ZPR1;APOA2;GC;SULT2A1;PMVK;SORD;SLC37A4;DIO1;ENSSSCG00000032768;HMGCS2;APOA4;ACAA1;TTR;COMT;PCBD1;APOE;TM7SF2;ENSSSCG00000023749;IYD;APOA1;FDX1;ALDH2;ACADVL;PCK1;SOD1;TKFC;DPM2;RBP1;ENSSSCG00000012202;DDC;PARK7
GO:0006066	alcohol metabolic process	http://amigo.geneontology.org/amigo/term/GO:0006066	79	24	6.50496	3.68949	7.15402e-09	2.61727e-06	397036;397133;397189;397419;397576;397673;397681;397691;641359;733685;780404;100144531;100152301;100153243;100155605;100156666;100158181;100233182;100286807;100312968;100520121;100520636;100522057;100627803	HAO1;ZPR1;APOA2;SULT2A1;PMVK;SORD;ENSSSCG00000032768;HMGCS2;APOA4;TTR;PCBD1;APOE;ENSSSCG00000023749;APOA1;FDX1;ALDH2;ACADVL;PCK1;SOD1;TKFC;DPM2;RBP1;ENSSSCG00000012202;PARK7
GO:0033700	phospholipid efflux	http://amigo.geneontology.org/amigo/term/GO:0033700	7	7	0.576389	12.1446	2.42066e-08	8.22334e-06	397576;397681;397691;406187;100153243;100286807;100381252	ZPR1;APOA2;ENSSSCG00000003086;ENSSSCG00000015069;APOA4;APOE;APOA1
GO:0032787	monocarboxylic acid metabolic process	http://amigo.geneontology.org/amigo/term/GO:0032787	131	31	10.7867	2.87391	3.44815e-08	1.04716e-05	396614;396924;396932;396949;397038;397072;397148;397246;397678;397681;397687;403216;406187;448982;780404;100144529;100144531;100152868;100152910;100153961;100156666;100156927;100156930;100286807;100381252;100515577;100516688;100516877;100520636;100627803;100737057	HAO1;CYP2E1;ZPR1;ENSSSCG00000003086;HOGA1;CYP2D25;CYP1A2;ECHS1;SLC37A4;ENSSSCG00000015069;APOA4;ACAA1;ETFB;FBP1;ACADS;ACOX2;BTD;ACSL1;ENSSSCG00000002348;PHGDH;C3;ACADVL;PCK1;PTGR1;KMO;AKR1A1;RBP1;PARK7;VNN1;ENSSSCG00000002351;FAAH
GO:0006629	lipid metabolic process	http://amigo.geneontology.org/amigo/term/GO:0006629	319	55	26.2669	2.09389	3.52281e-08	1.04716e-05	396614;396932;396949;397036;397072;397082;397133;397419;397576;397586;397654;397673;397678;397680;397681;397687;397691;403216;406187;414425;445539;448964;448982;641359;733636;733694;100127167;100141314;100144531;100152301;100152597;100152868;100152910;100153243;100153932;100155736;100156584;100156666;100156927;100156930;100233182;100286807;100312968;100381252;100514510;100515577;100516688;1005168…	HAO1;CYP2E1;ZPR1;APOA2;GC;SULT2A1;ENSSSCG00000003086;PMVK;CYP2D25;CYP1A2;ECHS1;APOH;SLC37A4;TMEM150A;ENSSSCG00000032768;AFP;RARRES2;HMGCS2;ENSSSCG00000015069;APOA4;ACAA1;ETFB;ENSSSCG00000006719;TTR;APOE;TM7SF2;ACADS;CERS4;ACOX2;DHRS4;FDPS;APOA1;FDX1;NR0B1;IDI1;PLA2G12B;ACSL1;ENSSSCG00000002348;ACP6;AKR1C2;LIPG;C3;ACADVL;PCK1;PTGR1;SOD1;DPM2;RBP1;HNF4A;ENSSSCG00000012202;ENSSSCG00000018055;ENSSSCG…
GO:0006575	cellular modified amino acid metabolic process	http://amigo.geneontology.org/amigo/term/GO:0006575	51	18	4.1994	4.28632	4.32599e-08	1.18186e-05	396784;397036;397246;397371;397444;397682;403124;414380;414382;414411;497050;780404;100151982;100153961;100515071;100521480;100626004;100626791	GSTZ1;BHMT;GNMT;HOGA1;ASS1;DIO1;GSTK1;ENSSSCG00000005663;IYD;AHCY;GSTA1;MTHFD1;SOD1;FOLR1;PARK7;VNN1;CHDH;SERINC2
GO:0042737	drug catabolic process	http://amigo.geneontology.org/amigo/term/GO:0042737	36	15	2.96429	5.06024	4.48344e-08	1.18186e-05	397065;397568;397687;403216;407067;641359;733685;100144531;100152910;100155530;100156500;100623339;100626791;100627803;100737727	HAO1;CYP2E1;SULT2A1;QPRT;GSTZ1;ENSSSCG00000021767;CYP2D25;CYP1A2;DPYS;COMT;ALDH2;PCK1;HBM;CAT;HBE1
GO:1901606	alpha-amino acid catabolic process	http://amigo.geneontology.org/amigo/term/GO:1901606	23	12	1.89385	6.3363	4.72146e-08	1.18186e-05	396841;397065;397115;397134;397148;397438;497050;100153961;100301559;100511756;100525698;100626791	GSTZ1;TDO2;HOGA1;TAT;ENSSSCG00000021767;GCAT;ARG1;AHCY;KMO;OTC;BCAT2;DAO
GO:1901575	organic substance catabolic process	http://amigo.geneontology.org/amigo/term/GO:1901575	478	71	39.3591	1.8039	1.64881e-07	3.92087e-05	396557;396614;396622;396689;396841;396924;396926;396932;396949;397025;397038;397065;397115;397134;397148;397189;397438;397522;397576;397681;397691;406187;497050;497064;497065;641359;733685;780404;100037961;100037992;100141314;100144519;100144528;100144531;100151875;100152597;100152910;100153243;100153818;100153961;100155139;100155530;100155894;100156500;100156927;100157270;100158098;100158181;100…	HAO1;ZPR1;APOA2;SULT2A1;ENSSSCG00000003086;QPRT;GSTZ1;TDO2;HOGA1;TAT;ENSSSCG00000021767;CYP1A2;DPYS;SORD;ECHS1;GCAT;GALT;RARRES2;ARG1;ENSSSCG00000015069;RNPS1;APOA4;PGLYRP2;ACAA1;ETFB;BLVRB;COMT;DCAF11;APOE;FBP1;ENSSSCG00000023749;ACADS;PSMB3;CTSV;ACOX2;GUSB;DCPS;APOA1;TNFAIP1;PSMA7;HDAC6;PLA2G12B;AHCY;RNF5;PYM1;CTSB;CLU;ENSSSCG00000002036;ALDH2;C7H6orf125;ACADVL;MAD2L2;BLVRA;PCK1;PSMB1;KMO;PSMB7…
GO:0008202	steroid metabolic process	http://amigo.geneontology.org/amigo/term/GO:0008202	73	21	6.01091	3.49365	1.84752e-07	4.18418e-05	397036;397133;397576;397586;397673;397680;397681;397691;445539;448964;641359;733694;100152301;100152910;100153243;100286807;100312968;100514510;100515577;100516688;100520636	ZPR1;APOA2;GC;SULT2A1;PMVK;CYP1A2;SLC37A4;ENSSSCG00000032768;AFP;HMGCS2;APOA4;ACAA1;ENSSSCG00000006719;APOE;TM7SF2;APOA1;FDX1;NR0B1;AKR1C2;ACADVL;SOD1
GO:0009063	cellular amino acid catabolic process	http://amigo.geneontology.org/amigo/term/GO:0009063	26	12	2.14087	5.60519	2.68443e-07	5.80324e-05	396841;397065;397115;397134;397148;397438;497050;100153961;100301559;100511756;100525698;100626791	GSTZ1;TDO2;HOGA1;TAT;ENSSSCG00000021767;GCAT;ARG1;AHCY;KMO;OTC;BCAT2;DAO
GO:0034370	triglyceride-rich lipoprotein particle remodeling	http://amigo.geneontology.org/amigo/term/GO:0034370	6	6	0.494048	12.1446	2.98945e-07	5.92409e-05	397576;397681;397691;406187;100153243;100286807	ZPR1;APOA2;ENSSSCG00000015069;APOA4;APOE;APOA1
GO:0034372	very-low-density lipoprotein particle remodeling	http://amigo.geneontology.org/amigo/term/GO:0034372	6	6	0.494048	12.1446	2.98945e-07	5.92409e-05	397576;397681;397691;406187;100153243;100286807	ZPR1;APOA2;ENSSSCG00000015069;APOA4;APOE;APOA1
GO:0098754	detoxification	http://amigo.geneontology.org/amigo/term/GO:0098754	41	15	3.37599	4.44314	3.48166e-07	6.6235e-05	396827;397036;397061;397117;397403;397417;397568;403124;407067;414913;780404;100515577;100521480;100521639;100737727	ENSSSCG00000002749;GSTK1;ACAA1;MT1A;GSTO1;ENSSSCG00000030300;IYD;CCS;GPX1;SOD1;TXNDC17;HBM;CAT;HBE1;PARK7
GO:0044255	cellular lipid metabolic process	http://amigo.geneontology.org/amigo/term/GO:0044255	241	43	19.8442	2.16687	5.07669e-07	9.08295e-05	396614;396932;396949;397072;397082;397419;397576;397654;397673;397678;397681;397687;397691;403216;406187;414425;448982;100127167;100141314;100144531;100152301;100152597;100152868;100152910;100153243;100153932;100156584;100156666;100156927;100156930;100233182;100286807;100381252;100515577;100516688;100516877;100520636;100522057;100522100;100625049;100626004;100627803;100627959	HAO1;CYP2E1;ZPR1;APOA2;ENSSSCG00000003086;PMVK;CYP2D25;CYP1A2;ECHS1;APOH;SLC37A4;TMEM150A;RARRES2;HMGCS2;ENSSSCG00000015069;APOA4;ACAA1;ETFB;TTR;APOE;ACADS;CERS4;ACOX2;DHRS4;FDPS;APOA1;IDI1;PLA2G12B;ACSL1;ENSSSCG00000002348;ACP6;C3;ACADVL;PCK1;PTGR1;DPM2;RBP1;ENSSSCG00000012202;ENSSSCG00000018055;ENSSSCG00000002351;FAAH;SERINC2;EPHX2
GO:0006790	sulfur compound metabolic process	http://amigo.geneontology.org/amigo/term/GO:0006790	59	18	4.85813	3.70513	5.42545e-07	9.08295e-05	397036;397371;397396;397444;397673;397682;414382;497050;641359;733654;780404;100144529;100152301;100152868;100301559;100521480;100626791;100737057	SULT2A1;GSTZ1;BHMT;TDO2;GNMT;PMVK;HMGCS2;GSTK1;BTD;AHCY;ENSSSCG00000002348;CTH;PHGDH;GSTA1;MTHFD1;SOD1;PARK7;BGN
GO:0006641	triglyceride metabolic process	http://amigo.geneontology.org/amigo/term/GO:0006641	23	11	1.89385	5.80828	5.50483e-07	9.08295e-05	397072;397576;397681;397691;406187;100144531;100233182;100286807;100381252;100516688;100522100	ZPR1;ENSSSCG00000003086;APOH;SLC37A4;ENSSSCG00000015069;APOA4;APOE;APOA1;C3;PCK1;ENSSSCG00000012202
GO:0097006	regulation of plasma lipoprotein particle levels	http://amigo.geneontology.org/amigo/term/GO:0097006	19	10	1.56448	6.39188	5.92034e-07	9.08295e-05	397381;397576;397681;397691;406187;100151912;100153243;100155736;100286807;100381252	ZPR1;APOA2;ENSSSCG00000003086;ENSSSCG00000015069;APOA4;APOE;APOA1;LIPG;CNPY2;MTTP
GO:0015914	phospholipid transport	http://amigo.geneontology.org/amigo/term/GO:0015914	19	10	1.56448	6.39188	5.92034e-07	9.08295e-05	397381;397576;397681;397691;406187;100153243;100286807;100381252;100511029;100518612	ZPR1;APOA2;ENSSSCG00000003086;ENSSSCG00000015069;APOA4;APOE;APOA1;MFSD2A;STARD10;MTTP
GO:0006720	isoprenoid metabolic process	http://amigo.geneontology.org/amigo/term/GO:0006720	19	10	1.56448	6.39188	5.92034e-07	9.08295e-05	397082;397419;397673;100141314;100152301;100152910;100153932;100156666;100522057;100625049	PMVK;CYP1A2;RARRES2;HMGCS2;TTR;DHRS4;FDPS;IDI1;DPM2;RBP1
GO:0044248	cellular catabolic process	http://amigo.geneontology.org/amigo/term/GO:0044248	513	73	42.2411	1.72818	6.23055e-07	9.26015e-05	396614;396622;396689;396841;396924;396926;396932;396949;397025;397038;397065;397115;397117;397134;397148;397189;397438;397522;397568;397576;397639;397681;397687;397691;403216;406187;407067;414425;497050;497064;497065;641359;733685;780404;100037961;100037992;100144519;100144528;100144531;100151875;100152910;100153243;100153818;100153961;100155139;100155530;100155894;100156500;100156927;100157270;1…	HAO1;CYP2E1;ZPR1;APOA2;SULT2A1;ENSSSCG00000003086;QPRT;GSTZ1;TDO2;HOGA1;TAT;ENSSSCG00000021767;CYP2D25;CYP1A2;DPYS;SORD;ECHS1;GCAT;TMEM150A;ARG1;ENSSSCG00000015069;RNPS1;APOA4;ACAA1;ETFB;BLVRB;COMT;DCAF11;APOE;FBP1;ENSSSCG00000023749;ACADS;PSMB3;GSTO1;CTSV;ACOX2;GUSB;DCPS;APOA1;TNFAIP1;PSMA7;EPHX1;HDAC6;AHCY;RNF5;PYM1;CTSB;CLU;ENSSSCG00000002036;ALDH2;C7H6orf125;ACADVL;BLVRA;PCK1;PSMB1;KMO;PSMB7;…
GO:0009056	catabolic process	http://amigo.geneontology.org/amigo/term/GO:0009056	582	80	47.9226	1.66936	6.83494e-07	9.42073e-05	396557;396614;396622;396689;396841;396924;396926;396932;396949;397025;397038;397065;397115;397117;397134;397148;397189;397438;397522;397568;397576;397639;397681;397687;397691;403216;406187;407067;414425;497050;497064;497065;641359;733685;780404;100037961;100037992;100141314;100144519;100144528;100144531;100151875;100152597;100152910;100153243;100153818;100153961;100155139;100155530;100155894;1001…	HAO1;CYP2E1;ZPR1;APOA2;SULT2A1;ENSSSCG00000003086;QPRT;GSTZ1;TDO2;HOGA1;TAT;ENSSSCG00000021767;CYP2D25;CYP1A2;DPYS;SORD;ECHS1;GCAT;TMEM150A;GALT;RARRES2;ARG1;ENSSSCG00000015069;RNPS1;APOA4;PGLYRP2;ACAA1;ETFB;BLVRB;COMT;DCAF11;APOE;FBP1;ENSSSCG00000023749;ACADS;PSMB3;GSTO1;CTSV;ACOX2;GUSB;DCPS;APOA1;TNFAIP1;PSMA7;EPHX1;HDAC6;PLA2G12B;AHCY;RNF5;PYM1;CTSB;CLU;ENSSSCG00000002036;ALDH2;C7H6orf125;ACAD…
GO:0006767	water-soluble vitamin metabolic process	http://amigo.geneontology.org/amigo/term/GO:0006767	12	8	0.988095	8.09639	7.19124e-07	9.42073e-05	396759;396784;396924;397117;397148;397246;768107;100737057	ENSSSCG00000009667;RGN;GSTO1;BTD;KMO;AKR1A1;FOLR1;VNN1
GO:0006638	neutral lipid metabolic process	http://amigo.geneontology.org/amigo/term/GO:0006638	28	12	2.30556	5.20482	7.26359e-07	9.42073e-05	397072;397576;397681;397691;406187;100144531;100153243;100233182;100286807;100381252;100516688;100522100	ZPR1;APOA2;ENSSSCG00000003086;APOH;SLC37A4;ENSSSCG00000015069;APOA4;APOE;APOA1;C3;PCK1;ENSSSCG00000012202
GO:0006639	acylglycerol metabolic process	http://amigo.geneontology.org/amigo/term/GO:0006639	28	12	2.30556	5.20482	7.26359e-07	9.42073e-05	397072;397576;397681;397691;406187;100144531;100153243;100233182;100286807;100381252;100516688;100522100	ZPR1;APOA2;ENSSSCG00000003086;APOH;SLC37A4;ENSSSCG00000015069;APOA4;APOE;APOA1;C3;PCK1;ENSSSCG00000012202
GO:0034368	protein-lipid complex remodeling	http://amigo.geneontology.org/amigo/term/GO:0034368	9	7	0.741071	9.44578	7.52708e-07	9.42073e-05	397576;397681;397691;406187;100153243;100155736;100286807	ZPR1;APOA2;ENSSSCG00000015069;APOA4;APOE;APOA1;LIPG
GO:0034369	plasma lipoprotein particle remodeling	http://amigo.geneontology.org/amigo/term/GO:0034369	9	7	0.741071	9.44578	7.52708e-07	9.42073e-05	397576;397681;397691;406187;100153243;100155736;100286807	ZPR1;APOA2;ENSSSCG00000015069;APOA4;APOE;APOA1;LIPG
GO:0055088	lipid homeostasis	http://amigo.geneontology.org/amigo/term/GO:0055088	39	14	3.21131	4.35959	1.13427e-06	0.000138323	397381;397576;397628;397681;397691;406187;414425;733636;100153243;100155736;100286807;100381252;100516688;100516877	ZPR1;APOA2;ENSSSCG00000003086;SLC37A4;ENSSSCG00000015069;APOA4;APOE;ACOX2;APOA1;LIPG;ANGPTL4;HNF4A;MTTP;EPHX2
GO:0071825	protein-lipid complex subunit organization	http://amigo.geneontology.org/amigo/term/GO:0071825	13	8	1.07044	7.47359	1.73631e-06	0.000201412	397381;397576;397681;397691;406187;100153243;100155736;100286807	ZPR1;APOA2;ENSSSCG00000015069;APOA4;APOE;APOA1;LIPG;MTTP
GO:0071827	plasma lipoprotein particle organization	http://amigo.geneontology.org/amigo/term/GO:0071827	13	8	1.07044	7.47359	1.73631e-06	0.000201412	397381;397576;397681;397691;406187;100153243;100155736;100286807	ZPR1;APOA2;ENSSSCG00000015069;APOA4;APOE;APOA1;LIPG;MTTP
GO:0006766	vitamin metabolic process	http://amigo.geneontology.org/amigo/term/GO:0006766	21	10	1.72917	5.78313	1.94476e-06	0.000215388	396759;396784;396924;397117;397148;397246;448964;768107;100156666;100737057	ENSSSCG00000009667;GC;RGN;GSTO1;BTD;KMO;AKR1A1;FOLR1;RBP1;VNN1
GO:0043691	reverse cholesterol transport	http://amigo.geneontology.org/amigo/term/GO:0043691	7	6	0.576389	10.4096	1.94737e-06	0.000215388	397576;397681;397691;100153243;100155736;100286807	ZPR1;APOA2;APOA4;APOE;APOA1;LIPG
GO:0009636	response to toxic substance	http://amigo.geneontology.org/amigo/term/GO:0009636	90	22	7.41071	2.96867	2.05514e-06	0.000222142	396827;396857;397036;397061;397117;397403;397417;397568;397639;403124;407067;414425;414913;780404;100152612;100512455;100515577;100521392;100521480;100521639;100621798;100737727	ENSSSCG00000002749;GSTK1;ACAA1;MT1A;SIGMAR1;GSTO1;PPIF;ENSSSCG00000030300;IYD;CCS;EPHX1;HDAC6;GPX1;SOD1;TXNDC17;HBM;CAT;HBE1;DDC;PARK7;ABTB2;EPHX2
GO:0034367	protein-containing complex remodeling	http://amigo.geneontology.org/amigo/term/GO:0034367	10	7	0.823413	8.5012	2.33211e-06	0.000246478	397576;397681;397691;406187;100153243;100155736;100286807	ZPR1;APOA2;ENSSSCG00000015069;APOA4;APOE;APOA1;LIPG
GO:0042632	cholesterol homeostasis	http://amigo.geneontology.org/amigo/term/GO:0042632	26	11	2.14087	5.13809	2.50715e-06	0.000253702	397381;397576;397681;397691;406187;414425;733636;100153243;100155736;100286807;100516688	ZPR1;APOA2;SLC37A4;ENSSSCG00000015069;APOA4;APOE;APOA1;LIPG;HNF4A;MTTP;EPHX2
GO:0055092	sterol homeostasis	http://amigo.geneontology.org/amigo/term/GO:0055092	26	11	2.14087	5.13809	2.50715e-06	0.000253702	397381;397576;397681;397691;406187;414425;733636;100153243;100155736;100286807;100516688	ZPR1;APOA2;SLC37A4;ENSSSCG00000015069;APOA4;APOE;APOA1;LIPG;HNF4A;MTTP;EPHX2
GO:0010873	positive regulation of cholesterol esterification	http://amigo.geneontology.org/amigo/term/GO:0010873	5	5	0.411706	12.1446	3.6815e-06	0.000364775	397576;397681;397691;100153243;100286807	ZPR1;APOA2;APOA4;APOE;APOA1
GO:0044283	small molecule biosynthetic process	http://amigo.geneontology.org/amigo/term/GO:0044283	168	32	13.8333	2.31325	3.93409e-06	0.000381848	396759;396841;396924;397036;397038;397148;397371;397438;397444;397576;397673;397681;397691;406187;414382;414411;733654;733683;768107;780404;100144529;100144531;100152301;100153961;100155605;100155919;100156666;100158181;100286807;100312968;100381252;100520636	UPB1;ENSSSCG00000009667;ZPR1;ENSSSCG00000003086;BHMT;GNMT;HOGA1;PMVK;ASS1;SORD;RGN;ENSSSCG00000032768;HMGCS2;ENSSSCG00000015069;APOA4;PCBD1;APOE;FBP1;APOA1;CTH;PHGDH;ACADVL;MTHFD1;PCK1;SOD1;KMO;AKR1A1;OTC;NME2;BCAT2;RBP1;PARK7
GO:0017144	drug metabolic process	http://amigo.geneontology.org/amigo/term/GO:0017144	201	36	16.5506	2.17515	4.28802e-06	0.000407876	396784;396857;396950;397036;397038;397065;397132;397148;397371;397444;397568;397586;397687;403216;407067;414411;641359;733654;733685;780404;100134963;100144529;100144531;100152612;100152910;100153818;100155530;100155605;100155687;100156500;100170117;100623339;100626791;100627803;100737057;100737727	HAO1;CYP2E1;SULT2A1;QPRT;GSTZ1;BHMT;GNMT;ENSSSCG00000021767;CYP2D25;CYP1A2;DPYS;ASS1;AFP;COMT;PCBD1;FBP1;ENSSSCG00000007524;PPIF;BTD;CTH;PHGDH;ALDH2;C7H6orf125;ATP5ME;PCK1;SOD1;FMO1;KMO;SAT2;HBM;FOLR1;CAT;HBE1;UQCR10;DDC;PARK7
GO:0044242	cellular lipid catabolic process	http://amigo.geneontology.org/amigo/term/GO:0044242	55	16	4.52877	3.53297	4.73815e-06	0.000441856	396614;396932;396949;397576;397681;397691;406187;100144531;100153243;100156927;100286807;100381252;100515577;100516877;100520636;100627803	HAO1;ZPR1;APOA2;ENSSSCG00000003086;ECHS1;ENSSSCG00000015069;APOA4;ACAA1;ETFB;APOE;ACADS;ACOX2;APOA1;ACADVL;PCK1;FAAH
GO:0051004	regulation of lipoprotein lipase activity	http://amigo.geneontology.org/amigo/term/GO:0051004	8	6	0.65873	9.10843	7.24958e-06	0.000663057	397628;397681;406187;100286807;100381252;100522100	ZPR1;ENSSSCG00000003086;APOH;ENSSSCG00000015069;APOA4;ANGPTL4
GO:0006732	coenzyme metabolic process	http://amigo.geneontology.org/amigo/term/GO:0006732	83	20	6.83433	2.9264	7.67535e-06	0.000688754	396688;396759;396784;396924;397038;397117;397132;397148;397246;397444;397673;414382;768107;780405;100152301;100152868;100155605;100301559;100623339;100737057	ENSSSCG00000009667;QPRT;TDO2;GNMT;PMVK;RGN;HMGCS2;PCBD1;FBP1;GSTO1;COASY;BTD;NAXE;ENSSSCG00000002348;MTHFD1;FMO1;KMO;AKR1A1;FOLR1;VNN1
GO:0016053	organic acid biosynthetic process	http://amigo.geneontology.org/amigo/term/GO:0016053	91	21	7.49306	2.80259	9.40388e-06	0.000813179	396759;396841;396924;397038;397148;397371;397438;397681;406187;414382;414411;733654;768107;780404;100144529;100153961;100155919;100156666;100286807;100381252;100520636	UPB1;ENSSSCG00000009667;ZPR1;ENSSSCG00000003086;BHMT;HOGA1;ASS1;RGN;ENSSSCG00000015069;APOA4;FBP1;CTH;PHGDH;ACADVL;MTHFD1;KMO;AKR1A1;OTC;BCAT2;RBP1;PARK7
GO:0046394	carboxylic acid biosynthetic process	http://amigo.geneontology.org/amigo/term/GO:0046394	91	21	7.49306	2.80259	9.40388e-06	0.000813179	396759;396841;396924;397038;397148;397371;397438;397681;406187;414382;414411;733654;768107;780404;100144529;100153961;100155919;100156666;100286807;100381252;100520636	UPB1;ENSSSCG00000009667;ZPR1;ENSSSCG00000003086;BHMT;HOGA1;ASS1;RGN;ENSSSCG00000015069;APOA4;FBP1;CTH;PHGDH;ACADVL;MTHFD1;KMO;AKR1A1;OTC;BCAT2;RBP1;PARK7
GO:0007596	blood coagulation	http://amigo.geneontology.org/amigo/term/GO:0007596	46	14	3.7877	3.69618	1.05702e-05	0.000897715	396954;397217;397474;397518;403164;733636;733660;100144304;100144442;100155038;100157966;100513828;100514354;100522100	F2;PROC;F9;PLG;CPB2;F12;FGB;FGG;APOH;HABP2;SERPING1;HNF4A;F5;FOXA2
GO:0016042	lipid catabolic process	http://amigo.geneontology.org/amigo/term/GO:0016042	78	19	6.42262	2.95829	1.10004e-05	0.00091786	396614;396932;396949;397576;397681;397691;406187;100141314;100144531;100152597;100152910;100153243;100156927;100286807;100381252;100515577;100516877;100520636;100627803	HAO1;ZPR1;APOA2;ENSSSCG00000003086;CYP1A2;ECHS1;RARRES2;ENSSSCG00000015069;APOA4;ACAA1;ETFB;APOE;ACADS;ACOX2;APOA1;PLA2G12B;ACADVL;PCK1;FAAH
GO:0015711	organic anion transport	http://amigo.geneontology.org/amigo/term/GO:0015711	93	21	7.65774	2.74232	1.34928e-05	0.00105305	396784;396853;397381;397576;397621;397681;397691;406187;448982;100037298;100152597;100153243;100153302;100157079;100286807;100381252;100511029;100516688;100517000;100518612;100620829	ZPR1;ENSSSCG00000021998;APOA2;ENSSSCG00000003086;SLC10A1;SLC17A1;SLC37A4;FOLR3;ENSSSCG00000015069;APOA4;APOE;APOA1;SLC16A12;PLA2G12B;MFSD2A;ACSL1;SLC7A2;SLC16A13;STARD10;FOLR1;MTTP
GO:0006631	fatty acid metabolic process	http://amigo.geneontology.org/amigo/term/GO:0006631	86	20	7.08135	2.82432	1.36267e-05	0.00105305	396614;396932;396949;397072;397678;397681;397687;403216;406187;448982;100144531;100152868;100156927;100156930;100286807;100381252;100515577;100516877;100520636;100627803	HAO1;CYP2E1;ZPR1;ENSSSCG00000003086;CYP2D25;ECHS1;ENSSSCG00000015069;APOA4;ACAA1;ETFB;ACADS;ACOX2;ACSL1;ENSSSCG00000002348;C3;ACADVL;PCK1;PTGR1;ENSSSCG00000002351;FAAH
GO:0006695	cholesterol biosynthetic process	http://amigo.geneontology.org/amigo/term/GO:0006695	16	8	1.31746	6.07229	1.39105e-05	0.00105305	397036;397576;397673;397681;397691;100152301;100286807;100312968	ZPR1;PMVK;ENSSSCG00000032768;HMGCS2;APOA4;APOE;APOA1;SOD1
GO:1902653	secondary alcohol biosynthetic process	http://amigo.geneontology.org/amigo/term/GO:1902653	16	8	1.31746	6.07229	1.39105e-05	0.00105305	397036;397576;397673;397681;397691;100152301;100286807;100312968	ZPR1;PMVK;ENSSSCG00000032768;HMGCS2;APOA4;APOE;APOA1;SOD1
GO:0007599	hemostasis	http://amigo.geneontology.org/amigo/term/GO:0007599	47	14	3.87004	3.61753	1.39491e-05	0.00105305	396954;397217;397474;397518;403164;733636;733660;100144304;100144442;100155038;100157966;100513828;100514354;100522100	F2;PROC;F9;PLG;CPB2;F12;FGB;FGG;APOH;HABP2;SERPING1;HNF4A;F5;FOXA2
GO:0050817	coagulation	http://amigo.geneontology.org/amigo/term/GO:0050817	47	14	3.87004	3.61753	1.39491e-05	0.00105305	396954;397217;397474;397518;403164;733636;733660;100144304;100144442;100155038;100157966;100513828;100514354;100522100	F2;PROC;F9;PLG;CPB2;F12;FGB;FGG;APOH;HABP2;SERPING1;HNF4A;F5;FOXA2
GO:0098869	cellular oxidant detoxification	http://amigo.geneontology.org/amigo/term/GO:0098869	36	12	2.96429	4.04819	1.62886e-05	0.00121044	397036;397061;397117;397403;397568;403124;407067;414913;780404;100521480;100521639;100737727	ENSSSCG00000002749;GSTK1;GSTO1;IYD;CCS;GPX1;SOD1;TXNDC17;HBM;CAT;HBE1;PARK7
GO:0016126	sterol biosynthetic process	http://amigo.geneontology.org/amigo/term/GO:0016126	21	9	1.72917	5.20482	1.8864e-05	0.00137953	397036;397576;397673;397681;397691;100152301;100286807;100312968;100514510	ZPR1;PMVK;ENSSSCG00000032768;HMGCS2;APOA4;APOE;TM7SF2;APOA1;SOD1
GO:0042730	fibrinolysis	http://amigo.geneontology.org/amigo/term/GO:0042730	9	6	0.741071	8.09639	2.02433e-05	0.00137953	397474;403164;733660;100155038;100514354;100522100	PLG;CPB2;F12;FGB;FGG;APOH
GO:0034377	plasma lipoprotein particle assembly	http://amigo.geneontology.org/amigo/term/GO:0034377	9	6	0.741071	8.09639	2.02433e-05	0.00137953	397381;397576;397681;397691;100153243;100286807	ZPR1;APOA2;APOA4;APOE;APOA1;MTTP
GO:0065005	protein-lipid complex assembly	http://amigo.geneontology.org/amigo/term/GO:0065005	9	6	0.741071	8.09639	2.02433e-05	0.00137953	397381;397576;397681;397691;100153243;100286807	ZPR1;APOA2;APOA4;APOE;APOA1;MTTP
GO:0010951	negative regulation of endopeptidase activity	http://amigo.geneontology.org/amigo/term/GO:0010951	61	16	5.02282	3.18546	2.03984e-05	0.00137953	396736;396799;396843;396937;396963;397072;397125;397585;397688;780404;100144304;100153513;100155945;100514581;100517609;100622531	UABP-2;SERPIND1;FETUB;ITIH2;SERPINA7;SERPINA6;AHSG;SERPINA5;ITIH4;SERPINA1;ITIH1;SERPING1;PIH1D1;C3;PARK7;SIAH2
GO:0010872	regulation of cholesterol esterification	http://amigo.geneontology.org/amigo/term/GO:0010872	6	5	0.494048	10.1205	2.05943e-05	0.00137953	397576;397681;397691;100153243;100286807	ZPR1;APOA2;APOA4;APOE;APOA1
GO:0034380	high-density lipoprotein particle assembly	http://amigo.geneontology.org/amigo/term/GO:0034380	6	5	0.494048	10.1205	2.05943e-05	0.00137953	397576;397681;397691;100153243;100286807	ZPR1;APOA2;APOA4;APOE;APOA1
GO:0006721	terpenoid metabolic process	http://amigo.geneontology.org/amigo/term/GO:0006721	13	7	1.07044	6.53939	2.67931e-05	0.001722	397082;397419;397673;100141314;100152910;100153932;100156666	CYP1A2;RARRES2;HMGCS2;TTR;DHRS4;FDPS;RBP1
GO:0046461	neutral lipid catabolic process	http://amigo.geneontology.org/amigo/term/GO:0046461	13	7	1.07044	6.53939	2.67931e-05	0.001722	397576;397681;397691;406187;100153243;100286807;100381252	ZPR1;APOA2;ENSSSCG00000003086;ENSSSCG00000015069;APOA4;APOE;APOA1
GO:0046464	acylglycerol catabolic process	http://amigo.geneontology.org/amigo/term/GO:0046464	13	7	1.07044	6.53939	2.67931e-05	0.001722	397576;397681;397691;406187;100153243;100286807;100381252	ZPR1;APOA2;ENSSSCG00000003086;ENSSSCG00000015069;APOA4;APOE;APOA1
GO:0008652	cellular amino acid biosynthetic process	http://amigo.geneontology.org/amigo/term/GO:0008652	22	9	1.81151	4.96824	2.9634e-05	0.00185447	396841;397371;397438;414382;414411;733654;780404;100144529;100155919	UPB1;BHMT;ASS1;CTH;PHGDH;MTHFD1;OTC;BCAT2;PARK7
GO:0072376	protein activation cascade	http://amigo.geneontology.org/amigo/term/GO:0072376	22	9	1.81151	4.96824	2.9634e-05	0.00185447	396842;396921;397072;397230;403164;100144304;100152125;100514354;100522100	MBL2;CRP;APCS;FGB;FGG;APOH;SERPING1;C3;MASP1
GO:1990748	cellular detoxification	http://amigo.geneontology.org/amigo/term/GO:1990748	38	12	3.12897	3.83513	3.02821e-05	0.00187041	397036;397061;397117;397403;397568;403124;407067;414913;780404;100521480;100521639;100737727	ENSSSCG00000002749;GSTK1;GSTO1;IYD;CCS;GPX1;SOD1;TXNDC17;HBM;CAT;HBE1;PARK7
GO:0015748	organophosphate ester transport	http://amigo.geneontology.org/amigo/term/GO:0015748	33	11	2.71726	4.04819	3.70343e-05	0.00225814	397381;397576;397681;397691;406187;100153243;100286807;100381252;100511029;100516688;100518612	ZPR1;APOA2;ENSSSCG00000003086;SLC37A4;ENSSSCG00000015069;APOA4;APOE;APOA1;MFSD2A;STARD10;MTTP
GO:0016125	sterol metabolic process	http://amigo.geneontology.org/amigo/term/GO:0016125	39	12	3.21131	3.73679	4.0553e-05	0.00244139	397036;397133;397576;397673;397681;397691;100152301;100153243;100286807;100312968;100514510;100520636	ZPR1;APOA2;PMVK;ENSSSCG00000032768;HMGCS2;APOA4;APOE;TM7SF2;APOA1;FDX1;ACADVL;SOD1
GO:0030193	regulation of blood coagulation	http://amigo.geneontology.org/amigo/term/GO:0030193	23	9	1.89385	4.75223	4.51951e-05	0.00265368	396954;397474;403164;733660;100144304;100155038;100513828;100514354;100522100	PROC;PLG;CPB2;F12;FGB;FGG;APOH;SERPING1;FOXA2
GO:1900046	regulation of hemostasis	http://amigo.geneontology.org/amigo/term/GO:1900046	23	9	1.89385	4.75223	4.51951e-05	0.00265368	396954;397474;403164;733660;100144304;100155038;100513828;100514354;100522100	PROC;PLG;CPB2;F12;FGB;FGG;APOH;SERPING1;FOXA2
GO:0051346	negative regulation of hydrolase activity	http://amigo.geneontology.org/amigo/term/GO:0051346	108	22	8.89286	2.4739	4.68715e-05	0.00265369	396736;396799;396843;396921;396937;396963;397072;397125;397585;397628;397688;406187;780404;100144304;100152612;100153243;100153513;100155341;100155945;100514581;100517609;100622531	UABP-2;SERPIND1;FETUB;ITIH2;APCS;APOA2;SERPINA7;SERPINA6;AHSG;SERPINA5;ITIH4;SERPINA1;ITIH1;SERPING1;ENSSSCG00000015069;PPIF;PIH1D1;NEIL1;C3;ANGPTL4;PARK7;SIAH2
GO:0034381	plasma lipoprotein particle clearance	http://amigo.geneontology.org/amigo/term/GO:0034381	10	6	0.823413	7.28675	4.71101e-05	0.00265369	397576;406187;100151912;100153243;100155736;100381252	APOA2;ENSSSCG00000003086;ENSSSCG00000015069;APOE;LIPG;CNPY2
GO:0019433	triglyceride catabolic process	http://amigo.geneontology.org/amigo/term/GO:0019433	10	6	0.823413	7.28675	4.71101e-05	0.00265369	397576;397681;397691;406187;100286807;100381252	ZPR1;ENSSSCG00000003086;ENSSSCG00000015069;APOA4;APOE;APOA1
GO:0097237	cellular response to toxic substance	http://amigo.geneontology.org/amigo/term/GO:0097237	65	16	5.35218	2.98943	4.79936e-05	0.00265369	397036;397061;397117;397403;397568;403124;407067;414913;780404;100152612;100512455;100521392;100521480;100521639;100621798;100737727	ENSSSCG00000002749;GSTK1;SIGMAR1;GSTO1;PPIF;IYD;CCS;HDAC6;GPX1;SOD1;TXNDC17;HBM;CAT;HBE1;PARK7;ABTB2
GO:0030195	negative regulation of blood coagulation	http://amigo.geneontology.org/amigo/term/GO:0030195	14	7	1.15278	6.07229	4.98236e-05	0.00265369	396954;397474;403164;733660;100155038;100514354;100522100	PROC;PLG;CPB2;F12;FGB;FGG;APOH
GO:1900047	negative regulation of hemostasis	http://amigo.geneontology.org/amigo/term/GO:1900047	14	7	1.15278	6.07229	4.98236e-05	0.00265369	396954;397474;403164;733660;100155038;100514354;100522100	PROC;PLG;CPB2;F12;FGB;FGG;APOH
GO:1901616	organic hydroxy compound catabolic process	http://amigo.geneontology.org/amigo/term/GO:1901616	14	7	1.15278	6.07229	4.98236e-05	0.00265369	397189;397576;641359;733685;100155530;100158181;100627803	HAO1;SULT2A1;SORD;COMT;APOE;ENSSSCG00000023749;ALDH2
GO:0072329	monocarboxylic acid catabolic process	http://amigo.geneontology.org/amigo/term/GO:0072329	34	11	2.7996	3.92913	5.0775e-05	0.00265369	396614;396924;396932;396949;100144531;100153961;100156927;100515577;100516877;100520636;100627803	HAO1;HOGA1;ECHS1;ACAA1;ETFB;ACADS;ACOX2;ACADVL;PCK1;AKR1A1;FAAH
GO:0008203	cholesterol metabolic process	http://amigo.geneontology.org/amigo/term/GO:0008203	34	11	2.7996	3.92913	5.0775e-05	0.00265369	397036;397133;397576;397673;397681;397691;100152301;100153243;100286807;100312968;100520636	ZPR1;APOA2;PMVK;ENSSSCG00000032768;HMGCS2;APOA4;APOE;APOA1;FDX1;ACADVL;SOD1
GO:1902652	secondary alcohol metabolic process	http://amigo.geneontology.org/amigo/term/GO:1902652	34	11	2.7996	3.92913	5.0775e-05	0.00265369	397036;397133;397576;397673;397681;397691;100152301;100153243;100286807;100312968;100520636	ZPR1;APOA2;PMVK;ENSSSCG00000032768;HMGCS2;APOA4;APOE;APOA1;FDX1;ACADVL;SOD1
GO:0006694	steroid biosynthetic process	http://amigo.geneontology.org/amigo/term/GO:0006694	40	12	3.29365	3.64337	5.37123e-05	0.00277669	397036;397133;397576;397673;397680;397681;397691;445539;100152301;100286807;100312968;100514510	ZPR1;PMVK;ENSSSCG00000032768;HMGCS2;APOA4;ENSSSCG00000006719;APOE;TM7SF2;APOA1;FDX1;NR0B1;SOD1
GO:0010466	negative regulation of peptidase activity	http://amigo.geneontology.org/amigo/term/GO:0010466	66	16	5.43452	2.94414	5.86864e-05	0.00300121	396736;396799;396843;396937;396963;397072;397125;397585;397688;780404;100144304;100153513;100155945;100514581;100517609;100622531	UABP-2;SERPIND1;FETUB;ITIH2;SERPINA7;SERPINA6;AHSG;SERPINA5;ITIH4;SERPINA1;ITIH1;SERPING1;PIH1D1;C3;PARK7;SIAH2
GO:0032371	regulation of sterol transport	http://amigo.geneontology.org/amigo/term/GO:0032371	19	8	1.56448	5.11351	6.54858e-05	0.00316493	397576;397681;397691;406187;100153243;100155736;100286807;100381252	ZPR1;APOA2;ENSSSCG00000003086;ENSSSCG00000015069;APOA4;APOE;APOA1;LIPG
GO:0032374	regulation of cholesterol transport	http://amigo.geneontology.org/amigo/term/GO:0032374	19	8	1.56448	5.11351	6.54858e-05	0.00316493	397576;397681;397691;406187;100153243;100155736;100286807;100381252	ZPR1;APOA2;ENSSSCG00000003086;ENSSSCG00000015069;APOA4;APOE;APOA1;LIPG
GO:0071466	cellular response to xenobiotic stimulus	http://amigo.geneontology.org/amigo/term/GO:0071466	24	9	1.97619	4.55422	6.71331e-05	0.00316493	397117;397687;403216;733636;100144529;100144531;100152910;100515577;100627508	CYP2E1;CYP2D25;CYP1A2;ACAA1;GSTO1;PHGDH;PCK1;HNF4A;EIF4EBP1
GO:0050818	regulation of coagulation	http://amigo.geneontology.org/amigo/term/GO:0050818	24	9	1.97619	4.55422	6.71331e-05	0.00316493	396954;397474;403164;733660;100144304;100155038;100513828;100514354;100522100	PROC;PLG;CPB2;F12;FGB;FGG;APOH;SERPING1;FOXA2
GO:0009072	aromatic amino acid family metabolic process	http://amigo.geneontology.org/amigo/term/GO:0009072	7	5	0.576389	8.6747	6.72115e-05	0.00316493	397148;403124;100301559;100511756;100626791	GSTZ1;TDO2;TAT;IYD;KMO
GO:0034433	steroid esterification	http://amigo.geneontology.org/amigo/term/GO:0034433	7	5	0.576389	8.6747	6.72115e-05	0.00316493	397576;397681;397691;100153243;100286807	ZPR1;APOA2;APOA4;APOE;APOA1
GO:0034434	sterol esterification	http://amigo.geneontology.org/amigo/term/GO:0034434	7	5	0.576389	8.6747	6.72115e-05	0.00316493	397576;397681;397691;100153243;100286807	ZPR1;APOA2;APOA4;APOE;APOA1
GO:0034435	cholesterol esterification	http://amigo.geneontology.org/amigo/term/GO:0034435	7	5	0.576389	8.6747	6.72115e-05	0.00316493	397576;397681;397691;100153243;100286807	ZPR1;APOA2;APOA4;APOE;APOA1
GO:0050819	negative regulation of coagulation	http://amigo.geneontology.org/amigo/term/GO:0050819	15	7	1.23512	5.66747	8.6867e-05	0.00400405	396954;397474;403164;733660;100155038;100514354;100522100	PROC;PLG;CPB2;F12;FGB;FGG;APOH
GO:0006805	xenobiotic metabolic process	http://amigo.geneontology.org/amigo/term/GO:0006805	15	7	1.23512	5.66747	8.6867e-05	0.00400405	397117;397687;403216;733636;100144529;100152910;100515577	CYP2E1;CYP2D25;CYP1A2;ACAA1;GSTO1;PHGDH;HNF4A
GO:1901564	organonitrogen compound metabolic process	http://amigo.geneontology.org/amigo/term/GO:1901564	1676	171	138.004	1.23909	8.7557e-05	0.00400405	396557;396622;396688;396736;396784;396799;396841;396842;396843;396857;396916;396921;396926;396937;396950;396954;396963;396998;397025;397036;397038;397061;397065;397072;397093;397115;397125;397132;397134;397148;397197;397230;397246;397371;397381;397396;397411;397438;397442;397444;397474;397518;397522;397576;397585;397621;397654;397673;397681;397682;397688;397691;403124;403164;406187;414380;414382;…	MBL2;UABP-2;UPB1;HGFAC;SERPIND1;ZPR1;CRP;F2;FETUB;PROC;ITIH2;APCS;APOA2;F9;PLG;SERPINA7;SULT2A1;CPB2;HPX;CPN1;ENSSSCG00000002749;F12;QPRT;GSTZ1;SERPINA6;BHMT;AHSG;TDO2;FGB;GNMT;HOGA1;SERPINA5;TAT;PMVK;FGG;ENSSSCG00000021767;CYP1A2;SLC17A1;DPYS;KRTCAP2;ASS1;APOH;GLRX5;GCAT;MMP7;ITIH4;SERPINA1;DIO1;ALG3;GLYCTK;ASPDH;ITIH1;HABP2;SERPING1;MRPL52;RARRES2;MRPS7;ARG1;HMGCS2;ENSSSCG00000015069;GSTK1;APOA…
GO:0046165	alcohol biosynthetic process	http://amigo.geneontology.org/amigo/term/GO:0046165	37	11	3.04663	3.61055	0.000121083	0.00548448	397036;397576;397673;397681;397691;780404;100144531;100152301;100155605;100286807;100312968	ZPR1;PMVK;ENSSSCG00000032768;HMGCS2;APOA4;PCBD1;APOE;APOA1;PCK1;SOD1;PARK7
GO:0006869	lipid transport	http://amigo.geneontology.org/amigo/term/GO:0006869	85	18	6.99901	2.57179	0.000137239	0.00615765	397093;397124;397381;397576;397681;397691;406187;448982;692188;100152597;100153243;100153302;100155736;100286807;100381252;100511029;100518612;100620829	APOM;ZPR1;ENSSSCG00000021998;APOA2;ENSSSCG00000003086;SLC10A1;RBP4;ENSSSCG00000015069;APOA4;APOE;INHBA;APOA1;PLA2G12B;MFSD2A;ACSL1;LIPG;STARD10;MTTP
GO:0009066	aspartate family amino acid metabolic process	http://amigo.geneontology.org/amigo/term/GO:0009066	16	7	1.31746	5.31325	0.000143611	0.0063833	397065;397371;414382;414411;733654;100144529;100525698	BHMT;ENSSSCG00000021767;ASS1;GCAT;CTH;PHGDH;MTHFD1
GO:0010876	lipid localization	http://amigo.geneontology.org/amigo/term/GO:0010876	93	19	7.65774	2.48115	0.000148802	0.0065528	397072;397093;397124;397381;397576;397681;397691;406187;448982;692188;100152597;100153243;100153302;100155736;100286807;100381252;100511029;100518612;100620829	APOM;ZPR1;ENSSSCG00000021998;APOA2;ENSSSCG00000003086;SLC10A1;RBP4;ENSSSCG00000015069;APOA4;APOE;INHBA;APOA1;PLA2G12B;MFSD2A;ACSL1;LIPG;C3;STARD10;MTTP
GO:0006820	anion transport	http://amigo.geneontology.org/amigo/term/GO:0006820	117	22	9.63393	2.2836	0.000164763	0.00718912	396784;396853;396992;397381;397576;397621;397681;397691;406187;448982;100037298;100152597;100153243;100153302;100157079;100286807;100381252;100511029;100516688;100517000;100518612;100620829	ZPR1;ENSSSCG00000021998;APOA2;ENSSSCG00000003086;SLC10A1;SLC17A1;SLC37A4;FOLR3;ENSSSCG00000015069;APOA4;APOE;APOA1;SLC16A12;PLA2G12B;MFSD2A;ACSL1;SLC7A2;SLC12A4;SLC16A13;STARD10;FOLR1;MTTP
GO:0008299	isoprenoid biosynthetic process	http://amigo.geneontology.org/amigo/term/GO:0008299	8	5	0.65873	7.59036	0.000167148	0.00722687	397673;100152301;100153932;100156666;100625049	PMVK;HMGCS2;FDPS;IDI1;RBP1
GO:0055090	acylglycerol homeostasis	http://amigo.geneontology.org/amigo/term/GO:0055090	12	6	0.988095	6.07229	0.000179676	0.00762981	397628;397681;406187;733636;100286807;100381252	ZPR1;ENSSSCG00000003086;ENSSSCG00000015069;APOA4;ANGPTL4;HNF4A
GO:0070328	triglyceride homeostasis	http://amigo.geneontology.org/amigo/term/GO:0070328	12	6	0.988095	6.07229	0.000179676	0.00762981	397628;397681;406187;733636;100286807;100381252	ZPR1;ENSSSCG00000003086;ENSSSCG00000015069;APOA4;ANGPTL4;HNF4A
GO:0009062	fatty acid catabolic process	http://amigo.geneontology.org/amigo/term/GO:0009062	27	9	2.22321	4.04819	0.000192617	0.00810696	396614;396932;396949;100144531;100156927;100515577;100516877;100520636;100627803	HAO1;ECHS1;ACAA1;ETFB;ACADS;ACOX2;ACADVL;PCK1;FAAH
GO:0008610	lipid biosynthetic process	http://amigo.geneontology.org/amigo/term/GO:0008610	143	25	11.7748	2.12318	0.000200966	0.00838417	397036;397072;397133;397576;397654;397673;397680;397681;397691;406187;445539;448982;100127167;100144531;100152301;100153243;100153932;100156666;100286807;100312968;100381252;100514510;100520636;100522057;100625049	ZPR1;APOA2;ENSSSCG00000003086;PMVK;ENSSSCG00000032768;HMGCS2;ENSSSCG00000015069;APOA4;ENSSSCG00000006719;APOE;TM7SF2;CERS4;FDPS;APOA1;FDX1;NR0B1;IDI1;ACSL1;C3;ACADVL;PCK1;SOD1;DPM2;RBP1;ENSSSCG00000018055
GO:0009410	response to xenobiotic stimulus	http://amigo.geneontology.org/amigo/term/GO:0009410	33	10	2.71726	3.68018	0.000207684	0.00858908	397117;397687;403216;733636;100144529;100144531;100152910;100158098;100515577;100627508	CYP2E1;CYP2D25;CYP1A2;ACAA1;GSTO1;PHGDH;PCK1;HNF4A;EIF4EBP1;RHBDD3
GO:0034384	high-density lipoprotein particle clearance	http://amigo.geneontology.org/amigo/term/GO:0034384	5	4	0.411706	9.71566	0.000211327	0.00866441	406187;100153243;100155736;100381252	APOA2;ENSSSCG00000003086;ENSSSCG00000015069;LIPG
GO:0006508	proteolysis	http://amigo.geneontology.org/amigo/term/GO:0006508	425	55	34.995	1.57165	0.000293253	0.0119206	396736;396799;396843;396926;396937;396954;396963;396998;397025;397061;397072;397125;397197;397411;397442;397474;397518;397522;397585;397688;403164;497064;497065;733660;780404;780410;100037961;100037992;100144304;100144442;100144528;100152125;100153513;100155038;100155139;100155894;100155945;100157270;100157341;100157966;100157984;100158098;100514354;100514581;100516921;100517609;100522100;1006205…	UABP-2;HGFAC;SERPIND1;F2;FETUB;PROC;ITIH2;F9;PLG;SERPINA7;CPB2;HPX;CPN1;ENSSSCG00000002749;F12;SERPINA6;AHSG;FGB;SERPINA5;FGG;APOH;MMP7;ITIH4;SERPINA1;ASPDH;ITIH1;HABP2;SERPING1;DCAF11;PSMB3;CTSV;PIH1D1;TNFAIP1;PSMA7;PSEN2;HDAC6;COPS7A;RNF5;CTSB;CLU;ENSSSCG00000002036;C3;PSMB1;MASP1;THOP1;PSMB7;DDRGK1;CLEC3B;ENSSSCG00000017913;PARK7;PSME2;ENSSSCG00000009138;SIAH2;RHBDD3;CELA2A
GO:0042743	hydrogen peroxide metabolic process	http://amigo.geneontology.org/amigo/term/GO:0042743	13	6	1.07044	5.60519	0.000310718	0.0124183	397036;397568;407067;780404;100152910;100737727	CYP1A2;SOD1;HBM;CAT;HBE1;PARK7
GO:0046164	alcohol catabolic process	http://amigo.geneontology.org/amigo/term/GO:0046164	13	6	1.07044	5.60519	0.000310718	0.0124183	397189;397576;641359;733685;100158181;100627803	HAO1;SULT2A1;SORD;APOE;ENSSSCG00000023749;ALDH2
GO:0010035	response to inorganic substance	http://amigo.geneontology.org/amigo/term/GO:0010035	91	18	7.49306	2.40222	0.000339327	0.0134486	396827;397036;397038;397207;397417;397568;403164;414913;780404;100127153;100152612;100152910;100514354;100517580;100521392;100523241;100525405;100621798	HAMP;FGB;FGG;CYP1A2;AQP9;TFR2;MT1A;FBP1;SIGMAR1;PPIF;ENSSSCG00000030300;CCS;ADPRS;HDAC6;KHK;SOD1;CAT;PARK7
GO:0045940	positive regulation of steroid metabolic process	http://amigo.geneontology.org/amigo/term/GO:0045940	9	5	0.741071	6.74699	0.000350779	0.0137876	397576;397681;397691;100153243;100286807	ZPR1;APOA2;APOA4;APOE;APOA1
GO:0043648	dicarboxylic acid metabolic process	http://amigo.geneontology.org/amigo/term/GO:0043648	24	8	1.97619	4.04819	0.000441399	0.0172073	396784;397148;414382;414411;100153961;100511756;100521318;100623339	QPRT;HOGA1;TAT;ASS1;MTHFD1;KMO;FOLR1;GPT2
GO:0045861	negative regulation of proteolysis	http://amigo.geneontology.org/amigo/term/GO:0045861	93	18	7.65774	2.35056	0.000448839	0.0173551	396736;396799;396843;396937;396963;397072;397125;397585;397688;780404;100144304;100153513;100155894;100155945;100514581;100517609;100621798;100622531	UABP-2;SERPIND1;FETUB;ITIH2;SERPINA7;SERPINA6;AHSG;SERPINA5;ITIH4;SERPINA1;ITIH1;SERPING1;PIH1D1;HDAC6;C3;DDRGK1;PARK7;SIAH2
GO:0061045	negative regulation of wound healing	http://amigo.geneontology.org/amigo/term/GO:0061045	19	7	1.56448	4.47432	0.000508957	0.0190598	396954;397474;403164;733660;100155038;100514354;100522100	PROC;PLG;CPB2;F12;FGB;FGG;APOH
GO:1901607	alpha-amino acid biosynthetic process	http://amigo.geneontology.org/amigo/term/GO:1901607	19	7	1.56448	4.47432	0.000508957	0.0190598	397371;397438;414382;414411;733654;780404;100144529	BHMT;ASS1;CTH;PHGDH;MTHFD1;OTC;PARK7
GO:0046503	glycerolipid catabolic process	http://amigo.geneontology.org/amigo/term/GO:0046503	19	7	1.56448	4.47432	0.000508957	0.0190598	397576;397681;397691;406187;100153243;100286807;100381252	ZPR1;APOA2;ENSSSCG00000003086;ENSSSCG00000015069;APOA4;APOE;APOA1
GO:0033344	cholesterol efflux	http://amigo.geneontology.org/amigo/term/GO:0033344	19	7	1.56448	4.47432	0.000508957	0.0190598	397576;397681;397691;406187;100153243;100286807;100381252	ZPR1;APOA2;ENSSSCG00000003086;ENSSSCG00000015069;APOA4;APOE;APOA1
GO:1901617	organic hydroxy compound biosynthetic process	http://amigo.geneontology.org/amigo/term/GO:1901617	57	13	4.69345	2.76982	0.000552004	0.0205104	396857;397036;397576;397673;397681;397691;780404;100144531;100152301;100155605;100286807;100312968;100514510	ZPR1;PMVK;ENSSSCG00000032768;HMGCS2;APOA4;PCBD1;APOE;TM7SF2;APOA1;PCK1;SOD1;DDC;PARK7
GO:0009404	toxin metabolic process	http://amigo.geneontology.org/amigo/term/GO:0009404	6	4	0.494048	8.09639	0.000592792	0.0208839	397132;733654;100152910;100515577	CYP1A2;ACAA1;CTH;FMO1
GO:0042537	benzene-containing compound metabolic process	http://amigo.geneontology.org/amigo/term/GO:0042537	6	4	0.494048	8.09639	0.000592792	0.0208839	397148;100301559;100515071;100515577	TDO2;ACAA1;ENSSSCG00000005663;KMO
GO:0009074	aromatic amino acid family catabolic process	http://amigo.geneontology.org/amigo/term/GO:0009074	6	4	0.494048	8.09639	0.000592792	0.0208839	397148;100301559;100511756;100626791	GSTZ1;TDO2;TAT;KMO
GO:0010896	regulation of triglyceride catabolic process	http://amigo.geneontology.org/amigo/term/GO:0010896	6	4	0.494048	8.09639	0.000592792	0.0208839	397681;406187;100286807;100381252	ZPR1;ENSSSCG00000003086;ENSSSCG00000015069;APOA4
GO:0051006	positive regulation of lipoprotein lipase activity	http://amigo.geneontology.org/amigo/term/GO:0051006	6	4	0.494048	8.09639	0.000592792	0.0208839	397681;100286807;100381252;100522100	ZPR1;ENSSSCG00000003086;APOH;APOA4
GO:0061365	positive regulation of triglyceride lipase activity	http://amigo.geneontology.org/amigo/term/GO:0061365	6	4	0.494048	8.09639	0.000592792	0.0208839	397681;100286807;100381252;100522100	ZPR1;ENSSSCG00000003086;APOH;APOA4
GO:0010984	regulation of lipoprotein particle clearance	http://amigo.geneontology.org/amigo/term/GO:0010984	6	4	0.494048	8.09639	0.000592792	0.0208839	406187;100151912;100155736;100381252	ENSSSCG00000003086;ENSSSCG00000015069;LIPG;CNPY2
GO:0051187	cofactor catabolic process	http://amigo.geneontology.org/amigo/term/GO:0051187	20	7	1.64683	4.2506	0.00072841	0.0254729	396622;397568;407067;497050;100515289;100625219;100737727	BLVRB;AHCY;BLVRA;HBM;CAT;HBE1;HMOX2
GO:0034308	primary alcohol metabolic process	http://amigo.geneontology.org/amigo/term/GO:0034308	15	6	1.23512	4.85783	0.000786071	0.0272887	397419;641359;733685;780404;100156666;100627803	HAO1;SULT2A1;TTR;ALDH2;RBP1;PARK7
GO:0002526	acute inflammatory response	http://amigo.geneontology.org/amigo/term/GO:0002526	26	8	2.14087	3.73679	0.00080995	0.0279139	396799;396842;397061;397585;780404;100144304;100144442;100158098	CRP;F2;ENSSSCG00000002749;AHSG;ITIH4;SERPING1;PARK7;RHBDD3
GO:1903035	negative regulation of response to wounding	http://amigo.geneontology.org/amigo/term/GO:1903035	21	7	1.72917	4.04819	0.00101652	0.034781	396954;397474;403164;733660;100155038;100514354;100522100	PROC;PLG;CPB2;F12;FGB;FGG;APOH
GO:1901565	organonitrogen compound catabolic process	http://amigo.geneontology.org/amigo/term/GO:1901565	308	41	25.3611	1.61665	0.00106815	0.0362866	396557;396622;396841;396926;397025;397065;397115;397134;397148;397438;397522;397576;497050;497064;497065;780404;100037961;100037992;100144528;100153818;100153961;100155139;100155530;100155894;100156500;100157270;100158098;100170117;100301559;100511756;100515289;100525698;100621798;100621969;100622531;100623339;100625219;100626738;100626791;100736650;100737417	QPRT;GSTZ1;TDO2;HOGA1;TAT;ENSSSCG00000021767;DPYS;GCAT;ARG1;PGLYRP2;BLVRB;COMT;DCAF11;APOE;PSMB3;CTSV;TNFAIP1;PSMA7;HDAC6;AHCY;RNF5;CTSB;CLU;ENSSSCG00000002036;C7H6orf125;MAD2L2;BLVRA;PSMB1;KMO;PSMB7;SAT2;OTC;BCAT2;DDRGK1;ENSSSCG00000017913;HMOX2;DAO;PARK7;PSME2;SIAH2;RHBDD3
GO:0046486	glycerolipid metabolic process	http://amigo.geneontology.org/amigo/term/GO:0046486	92	17	7.5754	2.24411	0.00111712	0.0372303	397072;397576;397654;397681;397691;406187;100144531;100153243;100156584;100233182;100286807;100381252;100516688;100522057;100522100;100626004;100627959	ZPR1;APOA2;ENSSSCG00000003086;APOH;SLC37A4;TMEM150A;ENSSSCG00000015069;APOA4;APOE;APOA1;ACP6;C3;PCK1;DPM2;ENSSSCG00000012202;ENSSSCG00000018055;SERINC2
GO:0006778	porphyrin-containing compound metabolic process	http://amigo.geneontology.org/amigo/term/GO:0006778	11	5	0.905754	5.52026	0.00111941	0.0372303	396622;396998;100152910;100515289;100625219	HPX;CYP1A2;BLVRB;BLVRA;HMOX2
GO:0006953	acute-phase response	http://amigo.geneontology.org/amigo/term/GO:0006953	11	5	0.905754	5.52026	0.00111941	0.0372303	396799;396842;397061;397585;100144442	CRP;F2;ENSSSCG00000002749;AHSG;ITIH4
GO:0010038	response to metal ion	http://amigo.geneontology.org/amigo/term/GO:0010038	54	12	4.44643	2.6988	0.00114785	0.0379109	396827;397038;397207;397417;403164;780404;100127153;100152612;100152910;100514354;100517580;100523241	HAMP;FGB;FGG;CYP1A2;AQP9;TFR2;MT1A;FBP1;PPIF;ENSSSCG00000030300;KHK;PARK7
GO:0006956	complement activation	http://amigo.geneontology.org/amigo/term/GO:0006956	16	6	1.31746	4.55422	0.00117155	0.0381635	396842;396921;397072;397230;100144304;100152125	MBL2;CRP;APCS;SERPING1;C3;MASP1
GO:0017001	antibiotic catabolic process	http://amigo.geneontology.org/amigo/term/GO:0017001	16	6	1.31746	4.55422	0.00117155	0.0381635	397568;407067;641359;733685;100144531;100737727	SULT2A1;ALDH2;PCK1;HBM;CAT;HBE1
GO:0015850	organic hydroxy compound transport	http://amigo.geneontology.org/amigo/term/GO:0015850	62	13	5.10516	2.54644	0.00128427	0.04129	397124;397576;397681;397691;406187;780404;100127153;100153243;100153302;100155736;100286807;100381252;100620829	ZPR1;ENSSSCG00000021998;APOA2;ENSSSCG00000003086;SLC10A1;AQP9;RBP4;ENSSSCG00000015069;APOA4;APOE;APOA1;LIPG;PARK7
GO:0019400	alditol metabolic process	http://amigo.geneontology.org/amigo/term/GO:0019400	7	4	0.576389	6.93976	0.00129357	0.04129	100144531;100158181;100233182;100520121	SORD;PCK1;TKFC;ENSSSCG00000012202
GO:0050996	positive regulation of lipid catabolic process	http://amigo.geneontology.org/amigo/term/GO:0050996	7	4	0.576389	6.93976	0.00129357	0.04129	397681;100153243;100286807;100381252	ZPR1;APOA2;ENSSSCG00000003086;APOA4
GO:0046364	monosaccharide biosynthetic process	http://amigo.geneontology.org/amigo/term/GO:0046364	22	7	1.81151	3.86418	0.00138719	0.0439831	396759;396924;397038;397444;768107;100144531;100158181	ENSSSCG00000009667;GNMT;SORD;RGN;FBP1;PCK1;AKR1A1
GO:0052548	regulation of endopeptidase activity	http://amigo.geneontology.org/amigo/term/GO:0052548	94	17	7.74008	2.19636	0.00143272	0.0451258	396736;396799;396843;396937;396963;397072;397125;397522;397585;397688;780404;100144304;100153513;100155945;100514581;100517609;100622531	UABP-2;SERPIND1;FETUB;ITIH2;SERPINA7;SERPINA6;AHSG;SERPINA5;ITIH4;SERPINA1;ITIH1;SERPING1;PIH1D1;C3;PARK7;PSME2;SIAH2
Spleen
geneSet	description	link	size	overlap	expect	enrichmentRatio	pValue	FDR	overlapId	userId
GO:0002376	immune system process	http://amigo.geneontology.org/amigo/term/GO:0002376	530	45	18.1399	2.48072	1.43096e-09	6.80566e-06	396659;396737;396923;396927;396979;397053;397057;397086;397106;397161;397249;397271;397302;397316;397395;397405;397406;397644;399522;399541;414374;444993;445460;445461;492312;494460;733671;100125540;100126235;100127147;100135050;100154922;100155631;100171389;100190992;100233192;100512336;100514999;100516257;100518817;100518846;100520446;100522044;100525187;100623761	ALAS2;PIR;AIF1;CCR1;FCER1G;PIP4K2A;IL10;CD180;CD79A;SH2B3;C1QC;CXCL12;IL12A;PLEK;CXCR4;TYROBP;BLK;C1QB;TNF;IL31RA;TLR4;PIK3CG;CD40;SGPL1;CD80;TENT2;ZP3;ENSSSCG00000029414;SYK;C1QA;SELL;MAPKAPK3;FES;EPO;STAT2;CD247;KLRK1;RPS3;TXK;SLA-DMB;AQP3;ENSSSCG00000039500;IL6R;IL18;PTPN6
GO:0002684	positive regulation of immune system process	http://amigo.geneontology.org/amigo/term/GO:0002684	200	25	6.84524	3.65217	8.23373e-09	1.95798e-05	396737;396927;397057;397086;397161;397271;397302;397395;397406;399522;399541;414374;444993;445461;492312;494460;733671;100125540;100126235;100155631;100171389;100190992;100233192;100518846;100623761	AIF1;CCR1;FCER1G;CD79A;CXCL12;BLK;C1QB;TNF;TLR4;CD40;CD80;ZP3;SYK;C1QA;MAPKAPK3;FES;CD247;KLRK1;RPS3;TXK;AQP3;ENSSSCG00000039500;IL6R;IL18;PTPN6
GO:0006955	immune response	http://amigo.geneontology.org/amigo/term/GO:0006955	303	31	10.3705	2.98924	1.43275e-08	2.27138e-05	396659;396737;396923;396927;397053;397057;397086;397106;397271;397302;397316;397395;397405;397406;397644;399522;399541;414374;444993;445461;494460;733671;100125540;100135050;100155631;100171389;100190992;100233192;100518846;100522044;100623761	AIF1;CCR1;FCER1G;IL10;CD180;CD79A;CXCL12;IL12A;CXCR4;TYROBP;BLK;C1QB;TNF;IL31RA;TLR4;CD40;ZP3;ENSSSCG00000029414;SYK;C1QA;MAPKAPK3;FES;STAT2;CD247;KLRK1;RPS3;TXK;SLA-DMB;IL6R;IL18;PTPN6
GO:0050778	positive regulation of immune response	http://amigo.geneontology.org/amigo/term/GO:0050778	123	18	4.20982	4.27572	1.1364e-07	0.000135118	396737;396927;397057;397086;397302;397395;397406;399522;399541;444993;445461;733671;100125540;100171389;100190992;100233192;100518846;100623761	FCER1G;CD79A;BLK;C1QB;TNF;TLR4;CD40;ZP3;SYK;C1QA;MAPKAPK3;CD247;KLRK1;RPS3;TXK;IL6R;IL18;PTPN6
GO:0002682	regulation of immune system process	http://amigo.geneontology.org/amigo/term/GO:0002682	285	28	9.75446	2.87048	1.99372e-07	0.000178634	396737;396927;397057;397086;397106;397161;397271;397302;397395;397405;397406;399522;399541;414374;444993;445460;445461;492312;494460;733671;100125540;100126235;100155631;100171389;100190992;100233192;100518846;100623761	AIF1;CCR1;FCER1G;IL10;CD79A;C1QC;CXCL12;TYROBP;BLK;C1QB;TNF;TLR4;CD40;CD80;ZP3;SYK;C1QA;MAPKAPK3;FES;CD247;KLRK1;RPS3;TXK;AQP3;ENSSSCG00000039500;IL6R;IL18;PTPN6
GO:0050776	regulation of immune response	http://amigo.geneontology.org/amigo/term/GO:0050776	157	20	5.37351	3.72196	2.25358e-07	0.000178634	396737;396927;397057;397086;397106;397302;397395;397406;399522;399541;444993;445461;733671;100125540;100155631;100171389;100190992;100233192;100518846;100623761	FCER1G;IL10;CD79A;BLK;C1QB;TNF;TLR4;CD40;ZP3;SYK;C1QA;MAPKAPK3;FES;CD247;KLRK1;RPS3;TXK;IL6R;IL18;PTPN6
GO:0006412	translation	http://amigo.geneontology.org/amigo/term/GO:0006412	208	23	7.11905	3.23077	3.55232e-07	0.000241355	396638;396952;396993;397086;397338;397598;414391;414392;414395;414398;414419;414422;733592;733671;100037995;100514637;100515520;100516393;100519021;100623051;100627662;100736809;100737826	WT1;RPL23;RPS23;RPL27;RPS27A;RPL21;ENSSSCG00000031838;EIF1AD;RPL31;ENSSSCG00000038507;ENSSSCG00000028850;RPL11;RPS17;RPL39;RPL6;ENSSSCG00000035811;RPL29;TNF;RPL38;RPS20;RPS3;RPL35;RPL36AL
GO:0043043	peptide biosynthetic process	http://amigo.geneontology.org/amigo/term/GO:0043043	211	23	7.22173	3.18483	4.61416e-07	0.000253397	396638;396952;396993;397086;397338;397598;414391;414392;414395;414398;414419;414422;733592;733671;100037995;100514637;100515520;100516393;100519021;100623051;100627662;100736809;100737826	WT1;RPL23;RPS23;RPL27;RPS27A;RPL21;ENSSSCG00000031838;EIF1AD;RPL31;ENSSSCG00000038507;ENSSSCG00000028850;RPL11;RPS17;RPL39;RPL6;ENSSSCG00000035811;RPL29;TNF;RPL38;RPS20;RPS3;RPL35;RPL36AL
GO:0002768	immune response-regulating cell surface receptor signaling pathway	http://amigo.geneontology.org/amigo/term/GO:0002768	31	9	1.06101	8.48247	5.2768e-07	0.000253397	396737;397302;397395;397406;733671;100125540;100171389;100190992;100623761	FCER1G;CD79A;BLK;CD40;SYK;CD247;KLRK1;RPS3;PTPN6
GO:0007166	cell surface receptor signaling pathway	http://amigo.geneontology.org/amigo/term/GO:0007166	512	39	17.5238	2.22554	5.32795e-07	0.000253397	396659;396737;396784;396923;396943;397057;397086;397178;397249;397302;397395;397405;397406;397523;397554;397644;399522;399541;414374;444993;492312;494460;606753;733671;733683;100125540;100152398;100154922;100171389;100190992;100192436;100516257;100519210;100522044;100525013;100525120;100525187;100623761;100736717	IL12RB2;CCR1;FCER1G;ADORA3;FGF18;CD180;CD79A;STAT4;SH2B3;CXCL12;PLEK;CXCR4;TYROBP;BLK;FOLR1;EPOR;TNF;IL31RA;CD53;TLR4;CD40;SGPL1;SYK;GRB2;EPO;STAT2;HGF;SPHK1;CD247;KLRK1;RPS3;TXK;NME2;ENSSSCG00000039500;ITGB2;IL6R;GNAI2;IL18;PTPN6
GO:0002443	leukocyte mediated immunity	http://amigo.geneontology.org/amigo/term/GO:0002443	76	13	2.60119	4.99771	1.20855e-06	0.000488588	396737;396927;397057;397086;397395;397406;399541;445461;100125540;100155631;100171389;100518846;100522044	FCER1G;C1QB;TNF;IL31RA;TLR4;CD40;ZP3;SYK;C1QA;FES;KLRK1;IL18;PTPN6
GO:0019221	cytokine-mediated signaling pathway	http://amigo.geneontology.org/amigo/term/GO:0019221	115	16	3.93601	4.06503	1.23277e-06	0.000488588	396659;396923;397057;397086;397178;397249;397406;397554;399522;414374;444993;494460;100125540;100519210;100522044;100736717	IL12RB2;CCR1;FCER1G;STAT4;CXCL12;CXCR4;EPOR;TNF;IL31RA;SYK;EPO;STAT2;SPHK1;TXK;IL6R;IL18
GO:0002764	immune response-regulating signaling pathway	http://amigo.geneontology.org/amigo/term/GO:0002764	56	11	1.91667	5.73913	2.0178e-06	0.000738204	396737;397302;397395;397406;399541;733671;100125540;100171389;100190992;100233192;100623761	FCER1G;CD79A;BLK;TLR4;CD40;SYK;MAPKAPK3;CD247;KLRK1;RPS3;PTPN6
GO:0071345	cellular response to cytokine stimulus	http://amigo.geneontology.org/amigo/term/GO:0071345	197	21	6.74256	3.11454	2.2508e-06	0.00076463	396659;396923;397057;397086;397178;397249;397271;397406;397554;399522;399541;414374;444993;494460;733671;100125540;100155518;100519210;100522044;100624193;100736717	IL12RB2;AIF1;CCR1;FCER1G;STAT4;CXCL12;MSC;CXCR4;EPOR;TNF;IL31RA;TLR4;SYK;EPO;STAT2;SPHK1;RPS3;TXK;LAPTM5;IL6R;IL18
GO:0032649	regulation of interferon-gamma production	http://amigo.geneontology.org/amigo/term/GO:0032649	28	8	0.958333	8.34783	2.67875e-06	0.000849342	396737;396927;397057;397086;397106;399522;399541;444993	IL10;TNF;TLR4;ZP3;KLRK1;TXK;IL6R;IL18
GO:0034097	response to cytokine	http://amigo.geneontology.org/amigo/term/GO:0034097	219	22	7.49554	2.93508	3.42786e-06	0.00100529	396659;396923;397057;397086;397178;397249;397271;397406;397554;399522;399541;414374;444993;494460;733671;100125540;100155518;100233192;100519210;100522044;100624193;100736717	IL12RB2;AIF1;CCR1;FCER1G;STAT4;CXCL12;MSC;CXCR4;EPOR;TNF;IL31RA;TLR4;SYK;MAPKAPK3;EPO;STAT2;SPHK1;RPS3;TXK;LAPTM5;IL6R;IL18
GO:0002429	immune response-activating cell surface receptor signaling pathway	http://amigo.geneontology.org/amigo/term/GO:0002429	29	8	0.99256	8.05997	3.59335e-06	0.00100529	396737;397302;397406;733671;100125540;100171389;100190992;100623761	FCER1G;CD79A;BLK;SYK;CD247;KLRK1;RPS3;PTPN6
GO:0002703	regulation of leukocyte mediated immunity	http://amigo.geneontology.org/amigo/term/GO:0002703	49	10	1.67708	5.96273	4.18124e-06	0.00110478	396737;396927;397057;397086;397395;397406;399541;100125540;100155631;100171389	FCER1G;TNF;TLR4;CD40;ZP3;SYK;FES;KLRK1;IL18;PTPN6
GO:0032609	interferon-gamma production	http://amigo.geneontology.org/amigo/term/GO:0032609	30	8	1.02679	7.7913	4.75981e-06	0.00111313	396737;396927;397057;397086;397106;399522;399541;444993	IL10;TNF;TLR4;ZP3;KLRK1;TXK;IL6R;IL18
GO:0032943	mononuclear cell proliferation	http://amigo.geneontology.org/amigo/term/GO:0032943	73	12	2.49851	4.80286	4.915e-06	0.00111313	396927;397057;397106;397271;397395;397644;399522;399541;733671;100125540;100171389;100190992	AIF1;IL10;CD180;CD79A;TLR4;CD40;ZP3;SYK;RPS3;IL6R;IL18;PTPN6
GO:0046651	lymphocyte proliferation	http://amigo.geneontology.org/amigo/term/GO:0046651	73	12	2.49851	4.80286	4.915e-06	0.00111313	396927;397057;397106;397271;397395;397644;399522;399541;733671;100125540;100171389;100190992	AIF1;IL10;CD180;CD79A;TLR4;CD40;ZP3;SYK;RPS3;IL6R;IL18;PTPN6
GO:0032729	positive regulation of interferon-gamma production	http://amigo.geneontology.org/amigo/term/GO:0032729	22	7	0.752976	9.29644	5.24313e-06	0.00112882	396737;396927;397057;397086;399522;399541;444993	TNF;TLR4;ZP3;KLRK1;TXK;IL6R;IL18
GO:0043604	amide biosynthetic process	http://amigo.geneontology.org/amigo/term/GO:0043604	243	23	8.31696	2.76543	5.57605e-06	0.00112882	396638;396952;396993;397086;397338;397598;414391;414392;414395;414398;414419;414422;733592;733671;100037995;100514637;100515520;100516393;100519021;100623051;100627662;100736809;100737826	WT1;RPL23;RPS23;RPL27;RPS27A;RPL21;ENSSSCG00000031838;EIF1AD;RPL31;ENSSSCG00000038507;ENSSSCG00000028850;RPL11;RPS17;RPL39;RPL6;ENSSSCG00000035811;RPL29;TNF;RPL38;RPS20;RPS3;RPL35;RPL36AL
GO:0002253	activation of immune response	http://amigo.geneontology.org/amigo/term/GO:0002253	74	12	2.53274	4.73796	5.69629e-06	0.00112882	396737;397302;397406;399541;445461;733671;100125540;100171389;100190992;100233192;100518846;100623761	FCER1G;CD79A;BLK;C1QB;TLR4;SYK;C1QA;MAPKAPK3;CD247;KLRK1;RPS3;PTPN6
GO:0070661	leukocyte proliferation	http://amigo.geneontology.org/amigo/term/GO:0070661	76	12	2.60119	4.61327	7.59282e-06	0.00144446	396927;397057;397106;397271;397395;397644;399522;399541;733671;100125540;100171389;100190992	AIF1;IL10;CD180;CD79A;TLR4;CD40;ZP3;SYK;RPS3;IL6R;IL18;PTPN6
GO:0048584	positive regulation of response to stimulus	http://amigo.geneontology.org/amigo/term/GO:0048584	463	34	15.8467	2.14555	8.24265e-06	0.00147705	396737;396927;397057;397086;397249;397271;397302;397395;397406;397644;399522;399541;414374;414398;414422;444993;445461;494460;733671;100125540;100154922;100156358;100171389;100190992;100192436;100233192;100516257;100518846;100519210;100522044;100525013;100525120;100623761;100627662	RPL23;AIF1;CCR1;FCER1G;FGF18;CD180;CD79A;SH2B3;ENSSSCG00000028850;RPL11;CXCL12;PLEK;BLK;C1QB;TNF;IL31RA;TLR4;CD40;ZP3;SYK;GRB2;C1QA;MAPKAPK3;EPO;HGF;SPHK1;CD247;KLRK1;RPS3;TXK;IL6R;IL18;S100A4;PTPN6
GO:0002757	immune response-activating signal transduction	http://amigo.geneontology.org/amigo/term/GO:0002757	53	10	1.81399	5.51272	8.82392e-06	0.00147705	396737;397302;397406;399541;733671;100125540;100171389;100190992;100233192;100623761	FCER1G;CD79A;BLK;TLR4;SYK;MAPKAPK3;CD247;KLRK1;RPS3;PTPN6
GO:0016477	cell migration	http://amigo.geneontology.org/amigo/term/GO:0016477	305	26	10.439	2.49066	8.8409e-06	0.00147705	396659;396737;396784;396927;396943;396979;397086;397271;397395;397406;414374;492312;494460;606753;733606;100037998;100125540;100127147;100155466;100157451;100511141;100515678;100519210;100525013;100525120;100525187	AIF1;CCR1;FCER1G;ADORA3;PRCP;FGF18;CXCL12;CXCR4;FOLR1;TNF;VASH1;PIK3CG;CD40;TMSB10;SGPL1;ZP3;SYK;SELL;HGF;SPHK1;KLRK1;TP53INP1;ARHGDIB;ENSSSCG00000039500;ITGB2;ENSSSCG00000012119
GO:0006518	peptide metabolic process	http://amigo.geneontology.org/amigo/term/GO:0006518	250	23	8.55655	2.688	9.02297e-06	0.00147705	396638;396952;396993;397086;397338;397598;414391;414392;414395;414398;414419;414422;733592;733671;100037995;100514637;100515520;100516393;100519021;100623051;100627662;100736809;100737826	WT1;RPL23;RPS23;RPL27;RPS27A;RPL21;ENSSSCG00000031838;EIF1AD;RPL31;ENSSSCG00000038507;ENSSSCG00000028850;RPL11;RPS17;RPL39;RPL6;ENSSSCG00000035811;RPL29;TNF;RPL38;RPS20;RPS3;RPL35;RPL36AL
GO:0032715	negative regulation of interleukin-6 production	http://amigo.geneontology.org/amigo/term/GO:0032715	10	5	0.342262	14.6087	9.59233e-06	0.00147705	397086;397106;399541;100171389;100525120	IL10;TNF;TLR4;HGF;PTPN6
GO:0050867	positive regulation of cell activation	http://amigo.geneontology.org/amigo/term/GO:0050867	78	12	2.66964	4.49498	1.00228e-05	0.00147705	396737;396927;397057;397161;397271;397395;397406;399522;399541;733671;100125540;100516257	AIF1;FCER1G;PLEK;TLR4;CD40;CD80;ZP3;SYK;KLRK1;RPS3;IL6R;IL18
GO:0032944	regulation of mononuclear cell proliferation	http://amigo.geneontology.org/amigo/term/GO:0032944	54	10	1.84821	5.41063	1.05167e-05	0.00147705	396927;397057;397106;397271;397395;399522;399541;733671;100125540;100171389	AIF1;IL10;TLR4;CD40;ZP3;SYK;RPS3;IL6R;IL18;PTPN6
GO:0050670	regulation of lymphocyte proliferation	http://amigo.geneontology.org/amigo/term/GO:0050670	54	10	1.84821	5.41063	1.05167e-05	0.00147705	396927;397057;397106;397271;397395;399522;399541;733671;100125540;100171389	AIF1;IL10;TLR4;CD40;ZP3;SYK;RPS3;IL6R;IL18;PTPN6
GO:0050865	regulation of cell activation	http://amigo.geneontology.org/amigo/term/GO:0050865	120	15	4.10714	3.65217	1.05592e-05	0.00147705	396737;396927;397057;397106;397161;397271;397395;397406;399522;399541;733671;100125540;100155631;100171389;100516257	AIF1;FCER1G;IL10;PLEK;TLR4;CD40;CD80;ZP3;SYK;FES;KLRK1;RPS3;IL6R;IL18;PTPN6
GO:0048870	cell motility	http://amigo.geneontology.org/amigo/term/GO:0048870	331	27	11.3289	2.38329	1.31696e-05	0.00173986	396659;396737;396784;396927;396943;396979;397086;397271;397395;397406;414374;492312;494460;606753;733606;100037998;100125540;100127147;100155466;100155631;100157451;100511141;100515678;100519210;100525013;100525120;100525187	AIF1;CCR1;FCER1G;ADORA3;PRCP;FGF18;CXCL12;CXCR4;FOLR1;TNF;VASH1;PIK3CG;CD40;TMSB10;SGPL1;ZP3;SYK;SELL;FES;HGF;SPHK1;KLRK1;TP53INP1;ARHGDIB;ENSSSCG00000039500;ITGB2;ENSSSCG00000012119
GO:0051674	localization of cell	http://amigo.geneontology.org/amigo/term/GO:0051674	331	27	11.3289	2.38329	1.31696e-05	0.00173986	396659;396737;396784;396927;396943;396979;397086;397271;397395;397406;414374;492312;494460;606753;733606;100037998;100125540;100127147;100155466;100155631;100157451;100511141;100515678;100519210;100525013;100525120;100525187	AIF1;CCR1;FCER1G;ADORA3;PRCP;FGF18;CXCL12;CXCR4;FOLR1;TNF;VASH1;PIK3CG;CD40;TMSB10;SGPL1;ZP3;SYK;SELL;FES;HGF;SPHK1;KLRK1;TP53INP1;ARHGDIB;ENSSSCG00000039500;ITGB2;ENSSSCG00000012119
GO:0007229	integrin-mediated signaling pathway	http://amigo.geneontology.org/amigo/term/GO:0007229	25	7	0.855655	8.18087	1.35566e-05	0.00174257	396943;397405;397406;492312;733683;100125540;100516257	FCER1G;PLEK;TYROBP;SYK;NME2;ENSSSCG00000039500;ITGB2
GO:0070663	regulation of leukocyte proliferation	http://amigo.geneontology.org/amigo/term/GO:0070663	56	10	1.91667	5.21739	1.47577e-05	0.00184704	396927;397057;397106;397271;397395;399522;399541;733671;100125540;100171389	AIF1;IL10;TLR4;CD40;ZP3;SYK;RPS3;IL6R;IL18;PTPN6
GO:0002181	cytoplasmic translation	http://amigo.geneontology.org/amigo/term/GO:0002181	35	8	1.19792	6.67826	1.65554e-05	0.00201892	396638;396993;414391;414419;733592;100516393;100627662;100737826	RPS23;RPL31;ENSSSCG00000038507;ENSSSCG00000028850;RPL6;ENSSSCG00000035811;RPL29;RPL38
GO:0032946	positive regulation of mononuclear cell proliferation	http://amigo.geneontology.org/amigo/term/GO:0032946	36	8	1.23214	6.49275	2.06772e-05	0.00239856	396927;397057;397271;397395;399522;399541;733671;100125540	AIF1;TLR4;CD40;ZP3;SYK;RPS3;IL6R;IL18
GO:0050671	positive regulation of lymphocyte proliferation	http://amigo.geneontology.org/amigo/term/GO:0050671	36	8	1.23214	6.49275	2.06772e-05	0.00239856	396927;397057;397271;397395;399522;399541;733671;100125540	AIF1;TLR4;CD40;ZP3;SYK;RPS3;IL6R;IL18
GO:0002250	adaptive immune response	http://amigo.geneontology.org/amigo/term/GO:0002250	84	12	2.875	4.17391	2.18582e-05	0.00243658	396737;396927;397057;397086;397395;397406;399522;445461;100125540;100171389;100518846;100522044	FCER1G;C1QB;TNF;IL31RA;CD40;ZP3;SYK;C1QA;KLRK1;IL6R;IL18;PTPN6
GO:0002252	immune effector process	http://amigo.geneontology.org/amigo/term/GO:0002252	159	17	5.44196	3.12387	2.20296e-05	0.00243658	396737;396923;396927;397057;397086;397106;397395;397405;397406;397644;399541;445461;100125540;100155631;100171389;100518846;100522044	FCER1G;IL10;CD180;TYROBP;C1QB;TNF;IL31RA;TLR4;CD40;ZP3;SYK;C1QA;FES;STAT2;KLRK1;IL18;PTPN6
GO:0002694	regulation of leukocyte activation	http://amigo.geneontology.org/amigo/term/GO:0002694	113	14	3.86756	3.61985	2.34983e-05	0.00253995	396737;396927;397057;397106;397161;397271;397395;397406;399522;399541;733671;100125540;100155631;100171389	AIF1;FCER1G;IL10;TLR4;CD40;CD80;ZP3;SYK;FES;KLRK1;RPS3;IL6R;IL18;PTPN6
GO:0007165	signal transduction	http://amigo.geneontology.org/amigo/term/GO:0007165	1106	60	37.8542	1.58503	2.73727e-05	0.00287363	396659;396737;396764;396784;396923;396927;396943;396979;397053;397057;397079;397086;397106;397178;397249;397271;397291;397302;397336;397368;397395;397405;397406;397475;397523;397554;397644;399522;399541;414374;414398;414422;444993;492312;494460;606753;733671;733683;100049692;100125540;100152398;100154922;100155466;100156358;100157537;100171389;100190992;100192436;100233192;100415936;100515678;100…	NR5A1;NPY2R;IL12RB2;RPL23;SLC11A1;ENSSSCG00000010369;AIF1;CCR1;FCER1G;ADORA3;PRCP;FGF18;IL10;CD180;CD79A;STAT4;GPR1;SH2B3;ENSSSCG00000028850;RPL11;ADA2;CXCL12;IL12A;PLEK;CXCR4;TYROBP;BLK;FOLR1;EPOR;TNF;IL31RA;CD53;TLR4;PIK3CG;SRGN;CD40;SGPL1;ZP3;DAPL1;SYK;GRB2;MAPKAPK3;EPO;STAT2;HGF;SPHK1;CD247;KLRK1;RPS3;TXK;NME2;ARHGDIB;ENSSSCG00000039500;ITGB2;IL6R;GNAI2;IL18;S100A4;RGS1;PTPN6
GO:0002449	lymphocyte mediated immunity	http://amigo.geneontology.org/amigo/term/GO:0002449	60	10	2.05357	4.86957	2.77938e-05	0.00287363	396737;396927;397057;397086;397395;397406;445461;100171389;100518846;100522044	FCER1G;C1QB;TNF;IL31RA;CD40;ZP3;C1QA;KLRK1;IL18;PTPN6
GO:0043603	cellular amide metabolic process	http://amigo.geneontology.org/amigo/term/GO:0043603	306	25	10.4732	2.38704	2.84278e-05	0.00287665	396638;396784;396952;396993;397086;397338;397598;414391;414392;414395;414398;414419;414422;733592;733671;100037995;100514637;100515520;100516393;100519021;100525187;100623051;100627662;100736809;100737826	WT1;RPL23;RPS23;RPL27;RPS27A;RPL21;ENSSSCG00000031838;EIF1AD;RPL31;ENSSSCG00000038507;ENSSSCG00000028850;RPL11;RPS17;RPL39;RPL6;FOLR1;ENSSSCG00000035811;RPL29;TNF;RPL38;SGPL1;RPS20;RPS3;RPL35;RPL36AL
GO:0050896	response to stimulus	http://amigo.geneontology.org/amigo/term/GO:0050896	1736	83	59.4167	1.39691	2.96589e-05	0.0029181	396659;396737;396764;396784;396923;396927;396943;396979;397031;397053;397057;397079;397086;397106;397148;397178;397249;397271;397291;397302;397316;397336;397338;397368;397395;397405;397406;397475;397523;397554;397644;399522;399541;403329;407066;407067;414374;414398;414422;444993;445461;492312;494460;606753;733671;733683;100049692;100125540;100126235;100127147;100135050;100152115;100152398;1001526…	NR5A1;NPY2R;WT1;HBE1;IL12RB2;ALAS2;RPL23;HBB;SLC11A1;ENSSSCG00000010369;AIF1;CCR1;FCER1G;HBM;ADORA3;PRCP;FGF18;IL10;CD180;CD79A;STAT4;GPR1;ENSSSCG00000009240;SH2B3;ENSSSCG00000028850;CYP11A1;RPL11;ADA2;CXCL12;HVCN1;IL12A;PLEK;MSC;CXCR4;TYROBP;CD163;BLK;FOLR1;C1QB;EPOR;TNF;VASH1;GJA10;IL31RA;CD53;TLR4;PIK3CG;SRGN;CD40;SGPL1;ZP3;ENSSSCG00000029414;DAPL1;SYK;GRB2;KMO;C1QA;SELL;MAPKAPK3;FES;EPO;STAT2…
GO:0006952	defense response	http://amigo.geneontology.org/amigo/term/GO:0006952	307	25	10.5074	2.37927	3.00645e-05	0.0029181	396737;396923;396927;396979;397031;397057;397086;397106;397271;397316;397395;397406;399541;414374;444993;445461;494460;100125540;100171389;100233192;100515678;100519210;100522044;100525120;100525175	AIF1;CCR1;FCER1G;PRCP;IL10;ENSSSCG00000009240;CXCL12;CD163;TNF;IL31RA;TLR4;PIK3CG;CD40;ZP3;ENSSSCG00000029414;SYK;C1QA;MAPKAPK3;STAT2;HGF;SPHK1;KLRK1;TXK;IL18;PTPN6
GO:0070665	positive regulation of leukocyte proliferation	http://amigo.geneontology.org/amigo/term/GO:0070665	38	8	1.3006	6.15103	3.1534e-05	0.00299952	396927;397057;397271;397395;399522;399541;733671;100125540	AIF1;TLR4;CD40;ZP3;SYK;RPS3;IL6R;IL18
GO:0010033	response to organic substance	http://amigo.geneontology.org/amigo/term/GO:0010033	629	40	21.5283	1.85802	3.6419e-05	0.00339625	396659;396737;396764;396784;396923;396943;397057;397086;397106;397178;397249;397271;397338;397368;397406;397523;397554;397644;399522;399541;403329;414374;414398;444993;494460;733671;100125540;100126235;100127147;100155518;100157451;100192436;100233192;100515678;100519210;100522044;100525013;100525120;100624193;100736717	NR5A1;WT1;IL12RB2;RPL23;SLC11A1;AIF1;CCR1;FCER1G;PRCP;FGF18;IL10;CD180;STAT4;CYP11A1;CXCL12;MSC;CXCR4;FOLR1;EPOR;TNF;IL31RA;TLR4;SYK;GRB2;SELL;MAPKAPK3;EPO;STAT2;HGF;SPHK1;KLRK1;RPS3;TXK;TP53INP1;AQP3;LAPTM5;ITGB2;IL6R;GNAI2;IL18
GO:0018108	peptidyl-tyrosine phosphorylation	http://amigo.geneontology.org/amigo/term/GO:0018108	89	12	3.04613	3.93942	3.96418e-05	0.0036257	397057;397161;397249;397395;399522;444993;100125540;100155631;100171389;100522044;100525120;100623761	BLK;IL31RA;CD40;CD80;SYK;FES;EPO;HGF;TXK;IL6R;IL18;PTPN6
GO:0055094	response to lipoprotein particle	http://amigo.geneontology.org/amigo/term/GO:0055094	7	4	0.239583	16.6957	4.24613e-05	0.00372354	396943;397406;399541;100125540	FCER1G;TLR4;SYK;ITGB2
GO:0071402	cellular response to lipoprotein particle stimulus	http://amigo.geneontology.org/amigo/term/GO:0071402	7	4	0.239583	16.6957	4.24613e-05	0.00372354	396943;397406;399541;100125540	FCER1G;TLR4;SYK;ITGB2
GO:0002696	positive regulation of leukocyte activation	http://amigo.geneontology.org/amigo/term/GO:0002696	76	11	2.60119	4.22883	4.31375e-05	0.00372354	396737;396927;397057;397161;397271;397395;397406;399522;399541;733671;100125540	AIF1;FCER1G;TLR4;CD40;CD80;ZP3;SYK;KLRK1;RPS3;IL6R;IL18
GO:0001775	cell activation	http://amigo.geneontology.org/amigo/term/GO:0001775	202	19	6.91369	2.74817	4.38431e-05	0.00372354	396737;396927;396979;397057;397106;397161;397271;397395;397405;397406;397644;399522;399541;733671;100125540;100155631;100171389;100190992;100516257	AIF1;FCER1G;IL10;CD180;CD79A;PLEK;TYROBP;TLR4;PIK3CG;CD40;CD80;ZP3;SYK;FES;KLRK1;RPS3;IL6R;IL18;PTPN6
GO:0002460	adaptive immune response based on somatic recombination of immune receptors built from immunoglobulin superfamily domains	http://amigo.geneontology.org/amigo/term/GO:0002460	64	10	2.19048	4.56522	4.96699e-05	0.00400876	396927;397057;397086;397395;397406;399522;445461;100171389;100518846;100522044	FCER1G;C1QB;TNF;IL31RA;CD40;ZP3;C1QA;IL6R;IL18;PTPN6
GO:0018212	peptidyl-tyrosine modification	http://amigo.geneontology.org/amigo/term/GO:0018212	91	12	3.11458	3.85284	4.96795e-05	0.00400876	397057;397161;397249;397395;399522;444993;100125540;100155631;100171389;100522044;100525120;100623761	BLK;IL31RA;CD40;CD80;SYK;FES;EPO;HGF;TXK;IL6R;IL18;PTPN6
GO:0032635	interleukin-6 production	http://amigo.geneontology.org/amigo/term/GO:0032635	30	7	1.02679	6.81739	4.97302e-05	0.00400876	397057;397086;397106;397406;399541;100171389;100525120	FCER1G;IL10;TNF;TLR4;HGF;IL18;PTPN6
GO:0071310	cellular response to organic substance	http://amigo.geneontology.org/amigo/term/GO:0071310	527	35	18.0372	1.94043	5.37102e-05	0.00425742	396659;396737;396784;396923;397057;397086;397106;397178;397249;397271;397338;397368;397406;397523;397554;397644;399522;399541;403329;414374;414398;444993;494460;733671;100125540;100155518;100157451;100192436;100515678;100519210;100522044;100525013;100525120;100624193;100736717	NR5A1;WT1;IL12RB2;RPL23;AIF1;CCR1;FCER1G;PRCP;FGF18;IL10;CD180;STAT4;CYP11A1;CXCL12;MSC;CXCR4;FOLR1;EPOR;TNF;IL31RA;TLR4;SYK;GRB2;EPO;STAT2;HGF;SPHK1;KLRK1;RPS3;TXK;TP53INP1;LAPTM5;IL6R;GNAI2;IL18
GO:0002274	myeloid leukocyte activation	http://amigo.geneontology.org/amigo/term/GO:0002274	41	8	1.40327	5.70095	5.64827e-05	0.00435408	396737;397057;397106;397405;397406;399541;100125540;100155631	FCER1G;IL10;TYROBP;TLR4;SYK;FES;KLRK1;IL18
GO:0070887	cellular response to chemical stimulus	http://amigo.geneontology.org/amigo/term/GO:0070887	664	41	22.7262	1.80409	5.67605e-05	0.00435408	396659;396737;396784;396923;397057;397086;397106;397178;397249;397271;397338;397368;397406;397523;397554;397644;399522;399541;403329;407066;407067;414374;414398;444993;494460;733671;100125540;100126235;100152115;100155518;100157451;100192436;100515678;100519210;100522044;100524615;100525013;100525120;100624193;100736717;100737727	NR5A1;WT1;HBE1;IL12RB2;RPL23;HBB;AIF1;CCR1;FCER1G;HBM;PRCP;FGF18;IL10;CD180;STAT4;CYP11A1;CXCL12;HVCN1;MSC;CXCR4;FOLR1;EPOR;TNF;IL31RA;TLR4;SYK;GRB2;EPO;STAT2;HGF;SPHK1;KLRK1;RPS3;TXK;TP53INP1;AQP3;LAPTM5;IL6R;GNAI2;IL18;ARID5A
GO:0001816	cytokine production	http://amigo.geneontology.org/amigo/term/GO:0001816	172	17	5.8869	2.88777	6.12935e-05	0.00449635	396737;396927;397057;397086;397106;397302;397395;397406;399522;399541;444993;733671;100125540;100171389;100519210;100522044;100525120	FCER1G;IL10;TNF;IL31RA;TLR4;CD40;ZP3;SYK;HGF;SPHK1;CD247;KLRK1;RPS3;TXK;IL6R;IL18;PTPN6
GO:0007159	leukocyte cell-cell adhesion	http://amigo.geneontology.org/amigo/term/GO:0007159	79	11	2.70387	4.06824	6.23306e-05	0.00449635	396927;397057;397086;397161;397271;399522;494460;733671;100125540;100127147;100171389	AIF1;CXCL12;TNF;CD80;ZP3;SYK;SELL;RPS3;IL6R;IL18;PTPN6
GO:0016064	immunoglobulin mediated immune response	http://amigo.geneontology.org/amigo/term/GO:0016064	31	7	1.06101	6.59748	6.24172e-05	0.00449635	396927;397086;397395;397406;445461;100171389;100518846	FCER1G;C1QB;TNF;CD40;ZP3;C1QA;PTPN6
GO:0019724	B cell mediated immunity	http://amigo.geneontology.org/amigo/term/GO:0019724	31	7	1.06101	6.59748	6.24172e-05	0.00449635	396927;397086;397395;397406;445461;100171389;100518846	FCER1G;C1QB;TNF;CD40;ZP3;C1QA;PTPN6
GO:0040011	locomotion	http://amigo.geneontology.org/amigo/term/GO:0040011	361	27	12.3557	2.18523	6.33422e-05	0.00449635	396659;396737;396784;396927;396943;396979;397086;397271;397395;397406;414374;492312;494460;606753;733606;100037998;100125540;100127147;100155466;100155631;100157451;100511141;100515678;100519210;100525013;100525120;100525187	AIF1;CCR1;FCER1G;ADORA3;PRCP;FGF18;CXCL12;CXCR4;FOLR1;TNF;VASH1;PIK3CG;CD40;TMSB10;SGPL1;ZP3;SYK;SELL;FES;HGF;SPHK1;KLRK1;TP53INP1;ARHGDIB;ENSSSCG00000039500;ITGB2;ENSSSCG00000012119
GO:0002455	humoral immune response mediated by circulating immunoglobulin	http://amigo.geneontology.org/amigo/term/GO:0002455	14	5	0.479167	10.4348	6.8187e-05	0.00476908	396927;397086;445461;100171389;100518846	C1QB;TNF;ZP3;C1QA;PTPN6
GO:0045321	leukocyte activation	http://amigo.geneontology.org/amigo/term/GO:0045321	174	17	5.95536	2.85457	7.10303e-05	0.0048336	396737;396927;397057;397106;397161;397271;397395;397405;397406;397644;399522;399541;733671;100125540;100155631;100171389;100190992	AIF1;FCER1G;IL10;CD180;CD79A;TYROBP;TLR4;CD40;CD80;ZP3;SYK;FES;KLRK1;RPS3;IL6R;IL18;PTPN6
GO:0002699	positive regulation of immune effector process	http://amigo.geneontology.org/amigo/term/GO:0002699	54	9	1.84821	4.86957	7.11422e-05	0.0048336	396737;396927;397057;397086;397395;397406;399541;100125540;100155631	FCER1G;TNF;TLR4;CD40;ZP3;SYK;FES;KLRK1;IL18
GO:0040012	regulation of locomotion	http://amigo.geneontology.org/amigo/term/GO:0040012	210	19	7.1875	2.64348	7.50556e-05	0.00502767	396659;396737;396927;397271;397395;414374;492312;494460;606753;733606;100037998;100155466;100155631;100157451;100511141;100515678;100519210;100525013;100525120	AIF1;CCR1;ADORA3;PRCP;FGF18;CXCL12;CXCR4;VASH1;CD40;TMSB10;ZP3;FES;HGF;SPHK1;KLRK1;TP53INP1;ARHGDIB;ENSSSCG00000039500;ENSSSCG00000012119
GO:0051716	cellular response to stimulus	http://amigo.geneontology.org/amigo/term/GO:0051716	1463	72	50.0729	1.4379	7.61524e-05	0.00503029	396659;396737;396764;396784;396923;396927;396943;396979;397053;397057;397079;397086;397106;397178;397249;397271;397291;397302;397336;397338;397368;397395;397405;397406;397475;397523;397554;397644;399522;399541;403329;407066;407067;414374;414398;414422;444993;492312;494460;606753;733671;733683;100049692;100125540;100126235;100152115;100152398;100154922;100155466;100155518;100156358;100157451;10015…	NR5A1;NPY2R;WT1;HBE1;IL12RB2;RPL23;HBB;SLC11A1;ENSSSCG00000010369;AIF1;CCR1;FCER1G;HBM;ADORA3;PRCP;FGF18;IL10;CD180;CD79A;STAT4;GPR1;SH2B3;ENSSSCG00000028850;CYP11A1;RPL11;ADA2;CXCL12;HVCN1;IL12A;PLEK;MSC;CXCR4;TYROBP;BLK;FOLR1;EPOR;TNF;VASH1;IL31RA;CD53;TLR4;PIK3CG;SRGN;CD40;SGPL1;ZP3;DAPL1;SYK;GRB2;MAPKAPK3;EPO;STAT2;HGF;SPHK1;CD247;KLRK1;RPS3;TXK;TP53INP1;AQP3;NME2;ARHGDIB;ENSSSCG00000039500;L…
GO:0030097	hemopoiesis	http://amigo.geneontology.org/amigo/term/GO:0030097	211	19	7.22173	2.63095	8.00976e-05	0.00521841	397057;397086;397249;397405;397406;414374;445460;100125540;100154922;100155631;100171389;100190992;100512336;100514999;100516257;100518817;100520446;100522044;100525187	ALAS2;PIR;CCR1;FCER1G;PIP4K2A;CD79A;SH2B3;C1QC;PLEK;TYROBP;TNF;IL31RA;SGPL1;TENT2;SYK;FES;EPO;IL18;PTPN6
GO:0010543	regulation of platelet activation	http://amigo.geneontology.org/amigo/term/GO:0010543	8	4	0.27381	14.6087	8.2669e-05	0.00531024	397406;399541;100125540;100516257	FCER1G;PLEK;TLR4;SYK
GO:1903037	regulation of leukocyte cell-cell adhesion	http://amigo.geneontology.org/amigo/term/GO:1903037	68	10	2.32738	4.29668	8.48104e-05	0.00531024	396927;397057;397086;397161;397271;399522;494460;733671;100125540;100171389	AIF1;CXCL12;TNF;CD80;ZP3;SYK;RPS3;IL6R;IL18;PTPN6
GO:0001819	positive regulation of cytokine production	http://amigo.geneontology.org/amigo/term/GO:0001819	111	13	3.79911	3.42186	8.48567e-05	0.00531024	396737;396927;397057;397086;397106;397395;397406;399522;399541;444993;733671;100125540;100525120	FCER1G;IL10;TNF;TLR4;CD40;ZP3;SYK;HGF;KLRK1;RPS3;TXK;IL6R;IL18
GO:0007154	cell communication	http://amigo.geneontology.org/amigo/term/GO:0007154	1199	62	41.0372	1.51082	8.75355e-05	0.00540674	396659;396737;396764;396784;396923;396927;396943;396979;397053;397057;397079;397086;397106;397178;397249;397271;397291;397302;397336;397368;397395;397405;397406;397475;397523;397554;397644;399522;399541;414374;414398;414422;444993;492312;494460;606753;733671;733683;100049692;100125540;100126235;100152398;100152611;100154922;100155466;100156358;100157537;100171389;100190992;100192436;100233192;100…	NR5A1;NPY2R;IL12RB2;RPL23;SLC11A1;ENSSSCG00000010369;AIF1;CCR1;FCER1G;ADORA3;PRCP;FGF18;IL10;CD180;CD79A;STAT4;GPR1;SH2B3;ENSSSCG00000028850;RPL11;ADA2;CXCL12;IL12A;PLEK;CXCR4;TYROBP;BLK;FOLR1;EPOR;TNF;GJA10;IL31RA;CD53;TLR4;PIK3CG;SRGN;CD40;SGPL1;ZP3;DAPL1;SYK;GRB2;MAPKAPK3;EPO;STAT2;HGF;SPHK1;CD247;KLRK1;RPS3;TXK;AQP3;NME2;ARHGDIB;ENSSSCG00000039500;ITGB2;IL6R;GNAI2;IL18;S100A4;RGS1;PTPN6
GO:0048513	animal organ development	http://amigo.geneontology.org/amigo/term/GO:0048513	654	40	22.3839	1.787	9.05123e-05	0.00551893	396659;396784;396927;397057;397086;397106;397249;397291;397338;397368;397405;397406;397473;397554;414374;445460;100049692;100125540;100126235;100154922;100155518;100155631;100171389;100190992;100192436;100511141;100512336;100514999;100516257;100516393;100518817;100518846;100519210;100520167;100520446;100522044;100522370;100525013;100525120;100525187	NR5A1;NPY2R;WT1;ENAM;ALAS2;PIR;TCF23;CCR1;FCER1G;PIP4K2A;FGF18;IL10;CD79A;SH2B3;C1QC;PLEK;MSC;CXCR4;TYROBP;PAX5;FOLR1;C1QB;EPOR;TNF;VASH1;RPL38;IL31RA;SRGN;SGPL1;TENT2;ZP3;SYK;GRB2;FES;EPO;HGF;SPHK1;AQP3;IL18;PTPN6
GO:0002520	immune system development	http://amigo.geneontology.org/amigo/term/GO:0002520	232	20	7.94048	2.51874	9.47986e-05	0.00570711	397057;397086;397249;397395;397405;397406;414374;445460;100125540;100154922;100155631;100171389;100190992;100512336;100514999;100516257;100518817;100520446;100522044;100525187	ALAS2;PIR;CCR1;FCER1G;PIP4K2A;CD79A;SH2B3;C1QC;PLEK;TYROBP;TNF;IL31RA;CD40;SGPL1;TENT2;SYK;FES;EPO;IL18;PTPN6
GO:0002697	regulation of immune effector process	http://amigo.geneontology.org/amigo/term/GO:0002697	83	11	2.84077	3.87218	9.90051e-05	0.00584114	396737;396927;397057;397086;397106;397395;397406;399541;100125540;100155631;100171389	FCER1G;IL10;TNF;TLR4;CD40;ZP3;SYK;FES;KLRK1;IL18;PTPN6
GO:0042531	positive regulation of tyrosine phosphorylation of STAT protein	http://amigo.geneontology.org/amigo/term/GO:0042531	15	5	0.513393	9.73913	9.94812e-05	0.00584114	397057;397249;397395;399522;100522044	IL31RA;CD40;EPO;IL6R;IL18
GO:2000145	regulation of cell motility	http://amigo.geneontology.org/amigo/term/GO:2000145	197	18	6.74256	2.66961	0.00010389	0.00602564	396737;396927;397271;397395;414374;492312;494460;606753;733606;100037998;100155466;100155631;100157451;100511141;100515678;100519210;100525013;100525120	AIF1;CCR1;ADORA3;PRCP;FGF18;CXCL12;VASH1;CD40;TMSB10;ZP3;FES;HGF;SPHK1;KLRK1;TP53INP1;ARHGDIB;ENSSSCG00000039500;ENSSSCG00000012119
GO:0030168	platelet activation	http://amigo.geneontology.org/amigo/term/GO:0030168	24	6	0.821429	7.30435	0.000116654	0.00668442	396979;397406;399541;100125540;100171389;100516257	FCER1G;PLEK;TLR4;PIK3CG;SYK;PTPN6
GO:0045785	positive regulation of cell adhesion	http://amigo.geneontology.org/amigo/term/GO:0045785	85	11	2.90923	3.78107	0.000123401	0.00698686	396927;397057;397086;397161;397271;399522;494460;733671;100125540;100153175;100171389	AIF1;CXCL12;ARPC2;TNF;CD80;ZP3;SYK;RPS3;IL6R;IL18;PTPN6
GO:0030334	regulation of cell migration	http://amigo.geneontology.org/amigo/term/GO:0030334	183	17	6.26339	2.71418	0.000133841	0.00748881	396737;396927;397271;397395;414374;492312;494460;606753;733606;100037998;100155466;100157451;100511141;100515678;100519210;100525013;100525120	AIF1;CCR1;ADORA3;PRCP;FGF18;CXCL12;VASH1;CD40;TMSB10;ZP3;HGF;SPHK1;KLRK1;TP53INP1;ARHGDIB;ENSSSCG00000039500;ENSSSCG00000012119
GO:0050853	B cell receptor signaling pathway	http://amigo.geneontology.org/amigo/term/GO:0050853	9	4	0.308036	12.9855	0.000144859	0.00801103	100125540;100171389;100190992;100623761	CD79A;BLK;SYK;PTPN6
GO:0050851	antigen receptor-mediated signaling pathway	http://amigo.geneontology.org/amigo/term/GO:0050851	25	6	0.855655	7.01217	0.000149211	0.00810132	397302;733671;100125540;100171389;100190992;100623761	CD79A;BLK;SYK;CD247;RPS3;PTPN6
GO:0046649	lymphocyte activation	http://amigo.geneontology.org/amigo/term/GO:0046649	150	15	5.13393	2.92174	0.000149898	0.00810132	396737;396927;397057;397106;397161;397271;397395;397406;397644;399522;399541;733671;100125540;100171389;100190992	AIF1;FCER1G;IL10;CD180;CD79A;TLR4;CD40;CD80;ZP3;SYK;KLRK1;RPS3;IL6R;IL18;PTPN6
GO:0048534	hematopoietic or lymphoid organ development	http://amigo.geneontology.org/amigo/term/GO:0048534	224	19	7.66667	2.47826	0.00017899	0.0095649	397057;397086;397249;397405;397406;414374;445460;100125540;100154922;100155631;100171389;100190992;100512336;100514999;100516257;100518817;100520446;100522044;100525187	ALAS2;PIR;CCR1;FCER1G;PIP4K2A;CD79A;SH2B3;C1QC;PLEK;TYROBP;TNF;IL31RA;SGPL1;TENT2;SYK;FES;EPO;IL18;PTPN6
GO:0002526	acute inflammatory response	http://amigo.geneontology.org/amigo/term/GO:0002526	26	6	0.889881	6.74247	0.000188567	0.00996472	396927;397031;397086;397406;100515678;100522044	FCER1G;PRCP;CD163;TNF;IL31RA;ZP3
GO:1901566	organonitrogen compound biosynthetic process	http://amigo.geneontology.org/amigo/term/GO:1901566	493	32	16.8735	1.89646	0.00019093	0.00997872	396638;396952;396993;397079;397086;397148;397249;397338;397351;397598;399541;414391;414392;414395;414398;414419;414422;733592;733671;733683;100037995;100155789;100514637;100515520;100516393;100518817;100519021;100519210;100623051;100627662;100736809;100737826	WT1;ALAS2;RPL23;RPS23;RPL27;RPS27A;RPL21;ENSSSCG00000031838;EIF1AD;RPL31;ENSSSCG00000038507;ENSSSCG00000028850;RPL11;ADA2;RXYLT1;RPS17;RPL39;RPL6;ENSSSCG00000035811;RPL29;TNF;RPL38;TLR4;HPRT1;RPS20;KMO;EPO;SPHK1;RPS3;NME2;RPL35;RPL36AL
GO:0051251	positive regulation of lymphocyte activation	http://amigo.geneontology.org/amigo/term/GO:0051251	62	9	2.12202	4.24123	0.000214999	0.0111145	396927;397057;397161;397271;397395;399522;399541;733671;100125540	AIF1;TLR4;CD40;CD80;ZP3;SYK;RPS3;IL6R;IL18
GO:0023052	signaling	http://amigo.geneontology.org/amigo/term/GO:0023052	1183	60	40.4896	1.48186	0.000229167	0.0116147	396659;396737;396764;396784;396923;396927;396943;396979;397053;397057;397079;397086;397106;397178;397249;397271;397291;397302;397336;397368;397395;397405;397406;397475;397523;397554;397644;399522;399541;414374;414398;414422;444993;492312;494460;606753;733671;733683;100049692;100125540;100152398;100154922;100155466;100156358;100157537;100171389;100190992;100192436;100233192;100415936;100515678;100…	NR5A1;NPY2R;IL12RB2;RPL23;SLC11A1;ENSSSCG00000010369;AIF1;CCR1;FCER1G;ADORA3;PRCP;FGF18;IL10;CD180;CD79A;STAT4;GPR1;SH2B3;ENSSSCG00000028850;RPL11;ADA2;CXCL12;IL12A;PLEK;CXCR4;TYROBP;BLK;FOLR1;EPOR;TNF;IL31RA;CD53;TLR4;PIK3CG;SRGN;CD40;SGPL1;ZP3;DAPL1;SYK;GRB2;MAPKAPK3;EPO;STAT2;HGF;SPHK1;CD247;KLRK1;RPS3;TXK;NME2;ARHGDIB;ENSSSCG00000039500;ITGB2;IL6R;GNAI2;IL18;S100A4;RGS1;PTPN6
GO:0022407	regulation of cell-cell adhesion	http://amigo.geneontology.org/amigo/term/GO:0022407	91	11	3.11458	3.53177	0.000229559	0.0116147	396927;397057;397086;397106;397161;397271;399522;494460;733671;100125540;100171389	AIF1;IL10;CXCL12;TNF;CD80;ZP3;SYK;RPS3;IL6R;IL18;PTPN6
GO:0042119	neutrophil activation	http://amigo.geneontology.org/amigo/term/GO:0042119	10	4	0.342262	11.687	0.000235037	0.0117667	397057;397405;397406;100125540	FCER1G;TYROBP;SYK;IL18
GO:0042221	response to chemical	http://amigo.geneontology.org/amigo/term/GO:0042221	853	47	29.1949	1.60987	0.000243639	0.0117792	396659;396737;396764;396784;396923;396943;396979;397057;397086;397106;397178;397249;397271;397338;397368;397406;397523;397554;397644;399522;399541;403329;407066;407067;414374;414398;444993;494460;733671;100125540;100126235;100127147;100152115;100155518;100155631;100157451;100192436;100233192;100515678;100519210;100522044;100524615;100525013;100525120;100624193;100736717;100737727	NR5A1;WT1;HBE1;IL12RB2;RPL23;HBB;SLC11A1;AIF1;CCR1;FCER1G;HBM;PRCP;FGF18;IL10;CD180;STAT4;CYP11A1;CXCL12;HVCN1;MSC;CXCR4;FOLR1;EPOR;TNF;IL31RA;TLR4;PIK3CG;SYK;GRB2;SELL;MAPKAPK3;FES;EPO;STAT2;HGF;SPHK1;KLRK1;RPS3;TXK;TP53INP1;AQP3;LAPTM5;ITGB2;IL6R;GNAI2;IL18;ARID5A
GO:0002706	regulation of lymphocyte mediated immunity	http://amigo.geneontology.org/amigo/term/GO:0002706	38	7	1.3006	5.38215	0.000245097	0.0117792	396737;396927;397057;397086;397395;397406;100171389	FCER1G;TNF;CD40;ZP3;KLRK1;IL18;PTPN6
GO:0002705	positive regulation of leukocyte mediated immunity	http://amigo.geneontology.org/amigo/term/GO:0002705	38	7	1.3006	5.38215	0.000245097	0.0117792	396737;396927;397057;397086;397395;397406;100125540	FCER1G;TNF;CD40;ZP3;SYK;KLRK1;IL18
GO:0050900	leukocyte migration	http://amigo.geneontology.org/amigo/term/GO:0050900	77	10	2.63542	3.79447	0.000245946	0.0117792	396737;396927;397086;397271;397406;414374;492312;494460;100125540;100127147	AIF1;CCR1;FCER1G;CXCL12;TNF;ZP3;SYK;SELL;KLRK1;ENSSSCG00000039500
GO:0008284	positive regulation of cell proliferation	http://amigo.geneontology.org/amigo/term/GO:0008284	211	18	7.22173	2.49248	0.000250148	0.0117792	396927;397057;397086;397106;397249;397271;397395;397523;399522;399541;414398;733671;100125540;100171389;100519210;100522044;100525013;100525175	RPL23;AIF1;FGF18;IL10;ENSSSCG00000009240;TNF;IL31RA;TLR4;CD40;ZP3;SYK;EPO;SPHK1;RPS3;IL6R;GNAI2;IL18;PTPN6
GO:0051270	regulation of cellular component movement	http://amigo.geneontology.org/amigo/term/GO:0051270	211	18	7.22173	2.49248	0.000250148	0.0117792	396737;396927;397271;397395;414374;492312;494460;606753;733606;100037998;100155466;100155631;100157451;100511141;100515678;100519210;100525013;100525120	AIF1;CCR1;ADORA3;PRCP;FGF18;CXCL12;VASH1;CD40;TMSB10;ZP3;FES;HGF;SPHK1;KLRK1;TP53INP1;ARHGDIB;ENSSSCG00000039500;ENSSSCG00000012119
GO:0009605	response to external stimulus	http://amigo.geneontology.org/amigo/term/GO:0009605	458	30	15.6756	1.9138	0.000271099	0.0126407	396659;396737;396764;396784;396923;396927;396979;397057;397086;397106;397271;397336;397395;397406;397644;399541;414374;494460;100125540;100126235;100127147;100152611;100155631;100157537;100233192;100516257;100522044;100525013;100525120;100525175	SLC11A1;AIF1;CCR1;FCER1G;FGF18;IL10;CD180;ENSSSCG00000009240;CXCL12;PLEK;CXCR4;FOLR1;TNF;GJA10;IL31RA;TLR4;PIK3CG;CD40;ZP3;DAPL1;SYK;SELL;MAPKAPK3;FES;STAT2;HGF;KLRK1;AQP3;IL18;RGS1
GO:1903039	positive regulation of leukocyte cell-cell adhesion	http://amigo.geneontology.org/amigo/term/GO:1903039	51	8	1.74554	4.58312	0.000281862	0.0130149	396927;397057;397086;397161;397271;399522;733671;100125540	AIF1;TNF;CD80;ZP3;SYK;RPS3;IL6R;IL18
GO:0001817	regulation of cytokine production	http://amigo.geneontology.org/amigo/term/GO:0001817	159	15	5.44196	2.75636	0.000287482	0.013084	396737;396927;397057;397086;397106;397395;397406;399522;399541;444993;733671;100125540;100171389;100519210;100525120	FCER1G;IL10;TNF;TLR4;CD40;ZP3;SYK;HGF;SPHK1;KLRK1;RPS3;TXK;IL6R;IL18;PTPN6
GO:0042102	positive regulation of T cell proliferation	http://amigo.geneontology.org/amigo/term/GO:0042102	28	6	0.958333	6.26087	0.000291611	0.013084	396927;397057;397271;399522;733671;100125540	AIF1;ZP3;SYK;RPS3;IL6R;IL18
GO:0032675	regulation of interleukin-6 production	http://amigo.geneontology.org/amigo/term/GO:0032675	28	6	0.958333	6.26087	0.000291611	0.013084	397086;397106;397406;399541;100171389;100525120	FCER1G;IL10;TNF;TLR4;HGF;PTPN6
GO:0051249	regulation of lymphocyte activation	http://amigo.geneontology.org/amigo/term/GO:0051249	95	11	3.25149	3.38307	0.000336846	0.0147734	396927;397057;397106;397161;397271;397395;399522;399541;733671;100125540;100171389	AIF1;IL10;TLR4;CD40;CD80;ZP3;SYK;RPS3;IL6R;IL18;PTPN6
GO:0042509	regulation of tyrosine phosphorylation of STAT protein	http://amigo.geneontology.org/amigo/term/GO:0042509	19	5	0.650298	7.68879	0.000344796	0.0147734	397057;397249;397395;399522;100522044	IL31RA;CD40;EPO;IL6R;IL18
GO:0046427	positive regulation of JAK-STAT cascade	http://amigo.geneontology.org/amigo/term/GO:0046427	19	5	0.650298	7.68879	0.000344796	0.0147734	397057;397249;397395;399522;100522044	IL31RA;CD40;EPO;IL6R;IL18
GO:1904894	positive regulation of STAT cascade	http://amigo.geneontology.org/amigo/term/GO:1904894	19	5	0.650298	7.68879	0.000344796	0.0147734	397057;397249;397395;399522;100522044	IL31RA;CD40;EPO;IL6R;IL18
GO:0002437	inflammatory response to antigenic stimulus	http://amigo.geneontology.org/amigo/term/GO:0002437	19	5	0.650298	7.68879	0.000344796	0.0147734	396927;397086;397106;397406;100522044	FCER1G;IL10;TNF;IL31RA;ZP3
GO:0072593	reactive oxygen species metabolic process	http://amigo.geneontology.org/amigo/term/GO:0072593	66	9	2.25893	3.98419	0.000349196	0.0148283	396737;397086;399541;407066;407067;100125540;100192436;100515678;100737727	HBE1;HBB;HBM;PRCP;TNF;TLR4;SYK;GRB2;KLRK1
GO:0006928	movement of cell or subcellular component	http://amigo.geneontology.org/amigo/term/GO:0006928	400	27	13.6905	1.97217	0.000360391	0.0149109	396659;396737;396784;396927;396943;396979;397086;397271;397395;397406;414374;492312;494460;606753;733606;100037998;100125540;100127147;100155466;100155631;100157451;100511141;100515678;100519210;100525013;100525120;100525187	AIF1;CCR1;FCER1G;ADORA3;PRCP;FGF18;CXCL12;CXCR4;FOLR1;TNF;VASH1;PIK3CG;CD40;TMSB10;SGPL1;ZP3;SYK;SELL;FES;HGF;SPHK1;KLRK1;TP53INP1;ARHGDIB;ENSSSCG00000039500;ITGB2;ENSSSCG00000012119
GO:0042127	regulation of cell proliferation	http://amigo.geneontology.org/amigo/term/GO:0042127	337	24	11.5342	2.08076	0.000366763	0.0149109	396927;397057;397086;397106;397249;397271;397338;397395;397523;399522;399541;414398;445534;606753;733671;100125540;100155631;100157451;100171389;100511141;100519210;100522044;100525013;100525175	WT1;RPL23;AIF1;ADORA3;FGF18;IL10;ENSSSCG00000009240;TNF;VASH1;IL31RA;TLR4;CD40;ZP3;SYK;FES;EPO;S100A11;SPHK1;RPS3;TP53INP1;IL6R;GNAI2;IL18;PTPN6
GO:0006898	receptor-mediated endocytosis	http://amigo.geneontology.org/amigo/term/GO:0006898	53	8	1.81399	4.41017	0.000370305	0.0149109	396943;397031;397406;397623;100125540;100154019;100192436;100516298	FCER1G;ENSSSCG00000006455;CD163;SIGLEC1;SYK;GRB2;MARCO;ITGB2
GO:0002675	positive regulation of acute inflammatory response	http://amigo.geneontology.org/amigo/term/GO:0002675	5	3	0.171131	17.5304	0.000373087	0.0149109	396927;397086;397406	FCER1G;TNF;ZP3
GO:1905941	positive regulation of gonad development	http://amigo.geneontology.org/amigo/term/GO:1905941	5	3	0.171131	17.5304	0.000373087	0.0149109	396927;397338;397368	NR5A1;WT1;ZP3
GO:0002283	neutrophil activation involved in immune response	http://amigo.geneontology.org/amigo/term/GO:0002283	5	3	0.171131	17.5304	0.000373087	0.0149109	397405;397406;100125540	FCER1G;TYROBP;SYK
GO:0015671	oxygen transport	http://amigo.geneontology.org/amigo/term/GO:0015671	5	3	0.171131	17.5304	0.000373087	0.0149109	407066;407067;100737727	HBE1;HBB;HBM
GO:0032502	developmental process	http://amigo.geneontology.org/amigo/term/GO:0032502	1158	58	39.6339	1.46339	0.000457674	0.0180682	396659;396737;396784;396923;396927;396979;397057;397086;397106;397249;397291;397338;397368;397395;397405;397406;397473;397554;399529;399541;406180;414374;445460;100049692;100125540;100126235;100127461;100152398;100152611;100153175;100154922;100155235;100155466;100155518;100155631;100157451;100171389;100190992;100192436;100511141;100512336;100514999;100515678;100516257;100516393;100518817;10051884…	NR5A1;ENSSSCG00000001393;TNP2;NPY2R;WT1;ENAM;ELSPBP1;ALAS2;PIR;TCF23;CCR1;FCER1G;PIP4K2A;PRCP;FGF18;IL10;CD79A;ENSSSCG00000009240;SH2B3;C1QC;PLEK;MSC;CXCR4;TYROBP;BLK;PAX5;FOLR1;C1QB;CHODL;ARPC2;EPOR;TNF;VASH1;GJA10;RPL38;IL31RA;CD53;TLR4;PIK3CG;SRGN;CD40;SGPL1;TENT2;ZP3;SYK;GRB2;GNL3;FES;EPO;STAT2;HGF;SPHK1;KLRK1;TP53INP1;AQP3;ARHGDIB;IL18;PTPN6
GO:0032101	regulation of response to external stimulus	http://amigo.geneontology.org/amigo/term/GO:0032101	166	15	5.68155	2.64013	0.000459797	0.0180682	396659;396737;396927;397086;397106;397271;397406;397644;399541;414374;494460;100125540;100516257;100525013;100525120	AIF1;CCR1;FCER1G;FGF18;IL10;CD180;CXCL12;PLEK;CXCR4;TNF;TLR4;ZP3;SYK;HGF;KLRK1
GO:0002822	regulation of adaptive immune response based on somatic recombination of immune receptors built from immunoglobulin superfamily domains	http://amigo.geneontology.org/amigo/term/GO:0002822	42	7	1.4375	4.86957	0.000467281	0.0180682	396927;397057;397086;397395;397406;399522;100171389	FCER1G;TNF;CD40;ZP3;IL6R;IL18;PTPN6
GO:0042129	regulation of T cell proliferation	http://amigo.geneontology.org/amigo/term/GO:0042129	42	7	1.4375	4.86957	0.000467281	0.0180682	396927;397057;397271;399522;733671;100125540;100171389	AIF1;ZP3;SYK;RPS3;IL6R;IL18;PTPN6
GO:0002366	leukocyte activation involved in immune response	http://amigo.geneontology.org/amigo/term/GO:0002366	55	8	1.88244	4.2498	0.000480158	0.0184164	397057;397395;397405;397406;397644;399541;100125540;100155631	FCER1G;CD180;TYROBP;TLR4;CD40;SYK;FES;IL18
GO:0008283	cell proliferation	http://amigo.geneontology.org/amigo/term/GO:0008283	409	27	13.9985	1.92878	0.00051607	0.0194866	396927;397057;397086;397106;397249;397271;397338;397395;397523;397644;399522;399541;414398;445534;606753;733671;100125540;100155631;100157451;100171389;100190992;100511141;100519210;100522044;100525013;100525120;100525175	WT1;RPL23;AIF1;ADORA3;FGF18;IL10;CD180;CD79A;ENSSSCG00000009240;TNF;VASH1;IL31RA;TLR4;CD40;ZP3;SYK;FES;EPO;S100A11;HGF;SPHK1;RPS3;TP53INP1;IL6R;GNAI2;IL18;PTPN6
GO:0006954	inflammatory response	http://amigo.geneontology.org/amigo/term/GO:0006954	150	14	5.13393	2.72696	0.000516255	0.0194866	396927;396979;397031;397057;397086;397106;397406;399541;414374;100125540;100515678;100519210;100522044;100525120	CCR1;FCER1G;PRCP;IL10;CD163;TNF;IL31RA;TLR4;PIK3CG;ZP3;SYK;HGF;SPHK1;IL18
GO:0002708	positive regulation of lymphocyte mediated immunity	http://amigo.geneontology.org/amigo/term/GO:0002708	31	6	1.06101	5.65498	0.000523648	0.0195106	396737;396927;397057;397086;397395;397406	FCER1G;TNF;CD40;ZP3;KLRK1;IL18
GO:0036230	granulocyte activation	http://amigo.geneontology.org/amigo/term/GO:0036230	12	4	0.410714	9.73913	0.000525097	0.0195106	397057;397405;397406;100125540	FCER1G;TYROBP;SYK;IL18
GO:0050731	positive regulation of peptidyl-tyrosine phosphorylation	http://amigo.geneontology.org/amigo/term/GO:0050731	43	7	1.47173	4.75632	0.000542412	0.0199977	397057;397161;397249;397395;399522;100522044;100525120	IL31RA;CD40;CD80;EPO;HGF;IL6R;IL18
GO:0007260	tyrosine phosphorylation of STAT protein	http://amigo.geneontology.org/amigo/term/GO:0007260	21	5	0.71875	6.95652	0.000570934	0.0207279	397057;397249;397395;399522;100522044	IL31RA;CD40;EPO;IL6R;IL18
GO:0050764	regulation of phagocytosis	http://amigo.geneontology.org/amigo/term/GO:0050764	21	5	0.71875	6.95652	0.000570934	0.0207279	396943;397086;397406;397623;100125540	FCER1G;TNF;SIGLEC1;SYK;ITGB2
GO:0048583	regulation of response to stimulus	http://amigo.geneontology.org/amigo/term/GO:0048583	834	45	28.5446	1.57648	0.000576708	0.020779	396659;396737;396784;396927;397053;397057;397079;397086;397106;397249;397271;397302;397336;397395;397406;397475;397644;399522;399541;414374;414398;414422;444993;445461;494460;733671;100125540;100154922;100155466;100155631;100156358;100171389;100190992;100192436;100233192;100511141;100515678;100516257;100518846;100519210;100522044;100525013;100525120;100623761;100627662	RPL23;ENSSSCG00000010369;AIF1;CCR1;FCER1G;PRCP;FGF18;IL10;CD180;CD79A;SH2B3;ENSSSCG00000028850;RPL11;ADA2;CXCL12;IL12A;PLEK;CXCR4;BLK;FOLR1;C1QB;TNF;VASH1;IL31RA;TLR4;CD40;ZP3;SYK;GRB2;C1QA;MAPKAPK3;FES;EPO;HGF;SPHK1;CD247;KLRK1;RPS3;TXK;ARHGDIB;IL6R;IL18;S100A4;RGS1;PTPN6
GO:0032103	positive regulation of response to external stimulus	http://amigo.geneontology.org/amigo/term/GO:0032103	71	9	2.43006	3.70361	0.000607576	0.0215104	396927;397086;397271;397406;397644;399541;414374;494460;100525013	AIF1;CCR1;FCER1G;FGF18;CD180;CXCL12;TNF;TLR4;ZP3
GO:0030099	myeloid cell differentiation	http://amigo.geneontology.org/amigo/term/GO:0030099	118	12	4.03869	2.97126	0.000607607	0.0215104	397086;397249;397405;397406;414374;445460;100155631;100171389;100514999;100518817;100520446;100522044	ALAS2;PIR;CCR1;FCER1G;PIP4K2A;C1QC;TYROBP;TNF;IL31RA;FES;EPO;PTPN6
GO:0002263	cell activation involved in immune response	http://amigo.geneontology.org/amigo/term/GO:0002263	57	8	1.95089	4.10069	0.0006151	0.0215104	397057;397395;397405;397406;397644;399541;100125540;100155631	FCER1G;CD180;TYROBP;TLR4;CD40;SYK;FES;IL18
GO:0022409	positive regulation of cell-cell adhesion	http://amigo.geneontology.org/amigo/term/GO:0022409	57	8	1.95089	4.10069	0.0006151	0.0215104	396927;397057;397086;397161;397271;399522;733671;100125540	AIF1;TNF;CD80;ZP3;SYK;RPS3;IL6R;IL18
GO:0007155	cell adhesion	http://amigo.geneontology.org/amigo/term/GO:0007155	228	18	7.80357	2.30664	0.00064767	0.0224841	396927;396943;397057;397086;397106;397161;397271;397623;399522;492312;494460;733671;100125540;100127147;100153175;100155631;100171389;100516257	AIF1;IL10;CXCL12;PLEK;ARPC2;TNF;CD80;SIGLEC1;ZP3;SYK;SELL;FES;RPS3;ENSSSCG00000039500;ITGB2;IL6R;IL18;PTPN6
GO:0030155	regulation of cell adhesion	http://amigo.geneontology.org/amigo/term/GO:0030155	136	13	4.65476	2.79284	0.000655016	0.0225743	396927;397057;397086;397106;397161;397271;399522;494460;733671;100125540;100153175;100155631;100171389	AIF1;IL10;CXCL12;ARPC2;TNF;CD80;ZP3;SYK;FES;RPS3;IL6R;IL18;PTPN6
GO:0071404	cellular response to low-density lipoprotein particle stimulus	http://amigo.geneontology.org/amigo/term/GO:0071404	6	3	0.205357	14.6087	0.00072748	0.0247135	396943;397406;100125540	FCER1G;SYK;ITGB2
GO:2000010	positive regulation of protein localization to cell surface	http://amigo.geneontology.org/amigo/term/GO:2000010	6	3	0.205357	14.6087	0.00072748	0.0247135	397086;397302;397406	FCER1G;TNF;CD247
GO:0002861	regulation of inflammatory response to antigenic stimulus	http://amigo.geneontology.org/amigo/term/GO:0002861	13	4	0.44494	8.98997	0.000738442	0.0247623	396927;397086;397106;397406	FCER1G;IL10;TNF;ZP3
GO:0002367	cytokine production involved in immune response	http://amigo.geneontology.org/amigo/term/GO:0002367	33	6	1.12946	5.31225	0.000744536	0.0247623	397057;397086;397106;397406;399541;100522044	FCER1G;IL10;TNF;IL31RA;TLR4;IL18
GO:0002824	positive regulation of adaptive immune response based on somatic recombination of immune receptors built from immunoglobulin superfamily domains	http://amigo.geneontology.org/amigo/term/GO:0002824	33	6	1.12946	5.31225	0.000744536	0.0247623	396927;397057;397086;397395;397406;399522	FCER1G;TNF;CD40;ZP3;IL6R;IL18
GO:0022610	biological adhesion	http://amigo.geneontology.org/amigo/term/GO:0022610	231	18	7.90625	2.27668	0.000757078	0.0250046	396927;396943;397057;397086;397106;397161;397271;397623;399522;492312;494460;733671;100125540;100127147;100153175;100155631;100171389;100516257	AIF1;IL10;CXCL12;PLEK;ARPC2;TNF;CD80;SIGLEC1;ZP3;SYK;SELL;FES;RPS3;ENSSSCG00000039500;ITGB2;IL6R;IL18;PTPN6
GO:0002821	positive regulation of adaptive immune response	http://amigo.geneontology.org/amigo/term/GO:0002821	34	6	1.16369	5.15601	0.000878973	0.0288303	396927;397057;397086;397395;397406;399522	FCER1G;TNF;CD40;ZP3;IL6R;IL18
GO:0044271	cellular nitrogen compound biosynthetic process	http://amigo.geneontology.org/amigo/term/GO:0044271	1082	54	37.0327	1.45817	0.000919784	0.0299623	396638;396737;396923;396927;396952;396993;397057;397079;397086;397106;397148;397249;397338;397351;397368;397395;397598;399541;414391;414392;414395;414398;414419;414422;444993;606753;733592;733671;733683;100037995;100127461;100152373;100153924;100155235;100155518;100156164;100156439;100157451;100514637;100514999;100515520;100516393;100518817;100519021;100519210;100520167;100524615;100525120;100525…	NR5A1;ENSSSCG00000001393;WT1;ALAS2;RPL23;PIR;RPS23;RPL27;RPS27A;RPL21;ADORA3;ENSSSCG00000031838;EIF1AD;IL10;STAT4;RPL31;ENSSSCG00000038507;ENSSSCG00000009240;ENSSSCG00000028850;ZNF79;RPL11;ADA2;RPS17;MSC;RPL39;CREG1;RPL6;PAX5;ENSSSCG00000035811;RPL29;TNF;RPL38;TLR4;CD40;HPRT1;ZP3;RPS20;KMO;GNL3;TCEANC;EPO;STAT2;NOP10;HGF;SPHK1;KLRK1;RPS3;TXK;TP53INP1;NME2;IL18;ARID5A;RPL35;RPL36AL
GO:0048731	system development	http://amigo.geneontology.org/amigo/term/GO:0048731	877	46	30.0164	1.5325	0.000930267	0.0300976	396659;396784;396927;396979;397057;397086;397106;397249;397291;397338;397368;397395;397405;397406;397473;397554;399541;414374;445460;100049692;100125540;100126235;100152611;100154922;100155518;100155631;100171389;100190992;100192436;100511141;100512336;100514999;100515678;100516257;100516393;100518817;100518846;100519210;100520167;100520446;100520642;100522044;100522370;100525013;100525120;100525…	NR5A1;NPY2R;WT1;ENAM;ALAS2;PIR;TCF23;CCR1;FCER1G;PIP4K2A;PRCP;FGF18;IL10;CD79A;SH2B3;C1QC;PLEK;MSC;CXCR4;TYROBP;PAX5;FOLR1;C1QB;CHODL;EPOR;TNF;VASH1;GJA10;RPL38;IL31RA;TLR4;PIK3CG;SRGN;CD40;SGPL1;TENT2;ZP3;SYK;GRB2;FES;EPO;HGF;SPHK1;AQP3;IL18;PTPN6
GO:0002819	regulation of adaptive immune response	http://amigo.geneontology.org/amigo/term/GO:0002819	47	7	1.60863	4.35153	0.000944329	0.0303461	396927;397057;397086;397395;397406;399522;100171389	FCER1G;TNF;CD40;ZP3;IL6R;IL18;PTPN6
GO:0051092	positive regulation of NF-kappaB transcription factor activity	http://amigo.geneontology.org/amigo/term/GO:0051092	35	6	1.19792	5.0087	0.00103138	0.0329212	397057;397086;397395;399541;733671;100519210	TNF;TLR4;CD40;SPHK1;RPS3;IL18
GO:0050870	positive regulation of T cell activation	http://amigo.geneontology.org/amigo/term/GO:0050870	48	7	1.64286	4.26087	0.00107446	0.0340674	396927;397057;397161;397271;399522;733671;100125540	AIF1;CD80;ZP3;SYK;RPS3;IL6R;IL18
GO:1901224	positive regulation of NIK/NF-kappaB signaling	http://amigo.geneontology.org/amigo/term/GO:1901224	24	5	0.821429	6.08696	0.00109777	0.0345762	397057;397086;399541;733671;100519210	TNF;TLR4;SPHK1;RPS3;IL18
GO:0006897	endocytosis	http://amigo.geneontology.org/amigo/term/GO:0006897	127	12	4.34673	2.7607	0.00117572	0.0366668	396943;396979;397031;397086;397271;397406;397623;100125540;100154019;100192436;100233192;100516298	AIF1;FCER1G;ENSSSCG00000006455;CD163;TNF;PIK3CG;SIGLEC1;SYK;GRB2;MARCO;MAPKAPK3;ITGB2
GO:0007275	multicellular organism development	http://amigo.geneontology.org/amigo/term/GO:0007275	964	49	32.994	1.48512	0.00121423	0.0366668	396659;396784;396927;396979;397057;397086;397106;397249;397291;397338;397368;397395;397405;397406;397473;397554;399541;406180;414374;445460;100049692;100125540;100126235;100127461;100152611;100154922;100155466;100155518;100155631;100171389;100190992;100192436;100511141;100512336;100514999;100515678;100516257;100516393;100518817;100518846;100519210;100520167;100520446;100520642;100522044;100522370…	NR5A1;ENSSSCG00000001393;TNP2;NPY2R;WT1;ENAM;ALAS2;PIR;TCF23;CCR1;FCER1G;PIP4K2A;PRCP;FGF18;IL10;CD79A;SH2B3;C1QC;PLEK;MSC;CXCR4;TYROBP;PAX5;FOLR1;C1QB;CHODL;EPOR;TNF;VASH1;GJA10;RPL38;IL31RA;TLR4;PIK3CG;SRGN;CD40;SGPL1;TENT2;ZP3;SYK;GRB2;FES;EPO;HGF;SPHK1;AQP3;ARHGDIB;IL18;PTPN6
GO:0071677	positive regulation of mononuclear cell migration	http://amigo.geneontology.org/amigo/term/GO:0071677	7	3	0.239583	12.5217	0.00124124	0.0366668	397271;414374;494460	AIF1;CCR1;CXCL12
GO:0090026	positive regulation of monocyte chemotaxis	http://amigo.geneontology.org/amigo/term/GO:0090026	7	3	0.239583	12.5217	0.00124124	0.0366668	397271;414374;494460	AIF1;CCR1;CXCL12
GO:0002438	acute inflammatory response to antigenic stimulus	http://amigo.geneontology.org/amigo/term/GO:0002438	7	3	0.239583	12.5217	0.00124124	0.0366668	396927;397406;100522044	FCER1G;IL31RA;ZP3
GO:0002863	positive regulation of inflammatory response to antigenic stimulus	http://amigo.geneontology.org/amigo/term/GO:0002863	7	3	0.239583	12.5217	0.00124124	0.0366668	396927;397086;397406	FCER1G;TNF;ZP3
GO:0033006	regulation of mast cell activation involved in immune response	http://amigo.geneontology.org/amigo/term/GO:0033006	7	3	0.239583	12.5217	0.00124124	0.0366668	397406;100125540;100155631	FCER1G;SYK;FES
GO:0043304	regulation of mast cell degranulation	http://amigo.geneontology.org/amigo/term/GO:0043304	7	3	0.239583	12.5217	0.00124124	0.0366668	397406;100125540;100155631	FCER1G;SYK;FES
GO:1901798	positive regulation of signal transduction by p53 class mediator	http://amigo.geneontology.org/amigo/term/GO:1901798	7	3	0.239583	12.5217	0.00124124	0.0366668	414398;414422;100627662	RPL23;ENSSSCG00000028850;RPL11
GO:0050901	leukocyte tethering or rolling	http://amigo.geneontology.org/amigo/term/GO:0050901	7	3	0.239583	12.5217	0.00124124	0.0366668	397086;494460;100127147	CXCL12;TNF;SELL
GO:1902533	positive regulation of intracellular signal transduction	http://amigo.geneontology.org/amigo/term/GO:1902533	222	17	7.59821	2.23737	0.00129991	0.0381628	397057;397086;397249;397395;399522;399541;414374;414398;414422;733671;100156358;100171389;100519210;100522044;100525013;100525120;100627662	RPL23;CCR1;FGF18;ENSSSCG00000028850;RPL11;TNF;IL31RA;TLR4;CD40;EPO;HGF;SPHK1;RPS3;IL6R;IL18;S100A4;PTPN6
GO:0002718	regulation of cytokine production involved in immune response	http://amigo.geneontology.org/amigo/term/GO:0002718	25	5	0.855655	5.84348	0.00133491	0.0384779	397057;397086;397106;397406;399541	FCER1G;IL10;TNF;TLR4;IL18
GO:0042100	B cell proliferation	http://amigo.geneontology.org/amigo/term/GO:0042100	25	5	0.855655	5.84348	0.00133491	0.0384779	397106;397395;397644;399541;100190992	IL10;CD180;CD79A;TLR4;CD40
GO:0042273	ribosomal large subunit biogenesis	http://amigo.geneontology.org/amigo/term/GO:0042273	25	5	0.855655	5.84348	0.00133491	0.0384779	397598;414422;733592;100516393;100627662	ENSSSCG00000028850;RPL11;RPL6;RPL38;RPL35
GO:0060326	cell chemotaxis	http://amigo.geneontology.org/amigo/term/GO:0060326	80	9	2.7381	3.28696	0.00145703	0.0417449	396659;396737;397271;397406;414374;494460;100125540;100525013;100525120	AIF1;CCR1;FCER1G;FGF18;CXCL12;CXCR4;SYK;HGF;KLRK1
GO:0050730	regulation of peptidyl-tyrosine phosphorylation	http://amigo.geneontology.org/amigo/term/GO:0050730	65	8	2.2247	3.59599	0.00149203	0.0422386	397057;397161;397249;397395;399522;100171389;100522044;100525120	IL31RA;CD40;CD80;EPO;HGF;IL6R;IL18;PTPN6
GO:0097237	cellular response to toxic substance	http://amigo.geneontology.org/amigo/term/GO:0097237	65	8	2.2247	3.59599	0.00149203	0.0422386	397086;397106;407066;407067;733671;100157451;100525120;100737727	HBE1;HBB;HBM;IL10;TNF;HGF;RPS3;TP53INP1
GO:0042098	T cell proliferation	http://amigo.geneontology.org/amigo/term/GO:0042098	51	7	1.74554	4.01023	0.00155098	0.0436476	396927;397057;397271;399522;733671;100125540;100171389	AIF1;ZP3;SYK;RPS3;IL6R;IL18;PTPN6
GO:0002700	regulation of production of molecular mediator of immune response	http://amigo.geneontology.org/amigo/term/GO:0002700	38	6	1.3006	4.61327	0.00161227	0.0451057	397057;397086;397106;397395;397406;399541	FCER1G;IL10;TNF;TLR4;CD40;IL18
GO:0031663	lipopolysaccharide-mediated signaling pathway	http://amigo.geneontology.org/amigo/term/GO:0031663	16	4	0.547619	7.30435	0.00173493	0.0474215	397057;397086;397644;399541	CD180;TNF;TLR4;IL18
GO:0002712	regulation of B cell mediated immunity	http://amigo.geneontology.org/amigo/term/GO:0002712	16	4	0.547619	7.30435	0.00173493	0.0474215	397086;397395;397406;100171389	FCER1G;TNF;CD40;PTPN6
GO:0002889	regulation of immunoglobulin mediated immune response	http://amigo.geneontology.org/amigo/term/GO:0002889	16	4	0.547619	7.30435	0.00173493	0.0474215	397086;397395;397406;100171389	FCER1G;TNF;CD40;PTPN6
GO:0017001	antibiotic catabolic process	http://amigo.geneontology.org/amigo/term/GO:0017001	16	4	0.547619	7.30435	0.00173493	0.0474215	397141;407066;407067;100737727	HBE1;HBB;HBM;NPL
Lung
geneSet	description	link	size	overlap	expect	enrichmentRatio	pValue	FDR	overlapId	userId
GO:0001525	angiogenesis	http://amigo.geneontology.org/amigo/term/GO:0001525	117	19	4.72991	4.01699	1.33145e-07	0.000633236	396836;396865;396912;396942;397094;397106;397155;397157;397172;397311;100048955;100152163;100153791;100157365;100157795;100515678;100523465;100525013;100625944	CHI3L1;CLEC14A;IL1A;RAMP2;C5AR1;KDR;LEPR;CALCRL;RGCC;DLL4;GATA2;ANXA1;VEGFA;CCN1;TMEM100;PRCP;GJA5;IL10;FGF18
GO:0006954	inflammatory response	http://amigo.geneontology.org/amigo/term/GO:0006954	150	21	6.06399	3.46307	3.84063e-07	0.000913301	396591;396601;396724;396865;396870;396942;397031;397086;397094;397106;397339;397360;397406;406188;414370;414374;100048955;100127489;100316849;100515678;100523811	AGER;ENSSSCG00000006588;CHI3L1;IL1A;C5AR1;CCRL2;TREM1;ANXA1;CCR1;CD163;PRCP;OLR1;PPBP;IL10;F8;TNF;MMP8;FCER1G;ZFP36;NFKBIA;CEBPB
GO:1904018	positive regulation of vasculature development	http://amigo.geneontology.org/amigo/term/GO:1904018	45	11	1.8192	6.04663	1.03647e-06	0.00164316	396865;396912;396942;397094;397106;397155;397157;397311;100048955;100523465;100525013	CHI3L1;IL1A;RAMP2;C5AR1;KDR;GATA2;ANXA1;VEGFA;TMEM100;IL10;FGF18
GO:0043534	blood vessel endothelial cell migration	http://amigo.geneontology.org/amigo/term/GO:0043534	32	9	1.29365	6.95706	2.91449e-06	0.00328516	396912;396942;397157;397311;100152163;100157365;100515678;100525013;100625944	CLEC14A;KDR;RGCC;DLL4;GATA2;ANXA1;VEGFA;PRCP;FGF18
GO:0048514	blood vessel morphogenesis	http://amigo.geneontology.org/amigo/term/GO:0048514	145	19	5.86186	3.24129	4.00442e-06	0.00328516	396836;396865;396912;396942;397094;397106;397155;397157;397172;397311;100048955;100152163;100153791;100157365;100157795;100515678;100523465;100525013;100625944	CHI3L1;CLEC14A;IL1A;RAMP2;C5AR1;KDR;LEPR;CALCRL;RGCC;DLL4;GATA2;ANXA1;VEGFA;CCN1;TMEM100;PRCP;GJA5;IL10;FGF18
GO:0001568	blood vessel development	http://amigo.geneontology.org/amigo/term/GO:0001568	161	20	6.50868	3.07282	5.07533e-06	0.00328516	396836;396865;396912;396942;397094;397106;397155;397157;397172;397311;414737;100048955;100152163;100153791;100157365;100157795;100515678;100523465;100525013;100625944	CHI3L1;CDH5;CLEC14A;IL1A;RAMP2;C5AR1;KDR;LEPR;CALCRL;RGCC;DLL4;GATA2;ANXA1;VEGFA;CCN1;TMEM100;PRCP;GJA5;IL10;FGF18
GO:0045766	positive regulation of angiogenesis	http://amigo.geneontology.org/amigo/term/GO:0045766	43	10	1.73834	5.7526	5.34893e-06	0.00328516	396865;396912;396942;397094;397106;397155;397157;397311;100048955;100525013	CHI3L1;IL1A;RAMP2;C5AR1;KDR;GATA2;ANXA1;VEGFA;IL10;FGF18
GO:0043535	regulation of blood vessel endothelial cell migration	http://amigo.geneontology.org/amigo/term/GO:0043535	27	8	1.09152	7.32924	6.91986e-06	0.00328516	396912;396942;397157;397311;100152163;100515678;100525013;100625944	KDR;RGCC;DLL4;GATA2;ANXA1;VEGFA;PRCP;FGF18
GO:0072359	circulatory system development	http://amigo.geneontology.org/amigo/term/GO:0072359	224	24	9.05556	2.65031	7.61487e-06	0.00328516	396836;396865;396912;396942;396959;397094;397106;397155;397157;397172;397311;414737;100048955;100152163;100153791;100157365;100157795;100515678;100522280;100523323;100523465;100525013;100622968;100625944	TBX5;CHI3L1;CDH5;CLEC14A;IL1A;RAMP2;C5AR1;KDR;LEPR;CALCRL;RGCC;DLL4;GATA2;ANXA1;VEGFA;CCN1;TMEM100;PRCP;GJA5;DUSP6;IL10;NOX4;FGF18;ANKRD1
GO:0001944	vasculature development	http://amigo.geneontology.org/amigo/term/GO:0001944	166	20	6.71081	2.98026	8.15517e-06	0.00328516	396836;396865;396912;396942;397094;397106;397155;397157;397172;397311;414737;100048955;100152163;100153791;100157365;100157795;100515678;100523465;100525013;100625944	CHI3L1;CDH5;CLEC14A;IL1A;RAMP2;C5AR1;KDR;LEPR;CALCRL;RGCC;DLL4;GATA2;ANXA1;VEGFA;CCN1;TMEM100;PRCP;GJA5;IL10;FGF18
GO:0040012	regulation of locomotion	http://amigo.geneontology.org/amigo/term/GO:0040012	210	23	8.48958	2.7092	8.32634e-06	0.00328516	396570;396591;396701;396735;396912;396942;397157;397309;397311;397564;414374;100037998;100048955;100049669;100152163;100153791;100157653;100510966;100515678;100522280;100524448;100525013;100625944	AGER;RNASE10;TBX5;TACSTD2;C5AR1;KDR;RGCC;DLL4;SEMA3G;GATA2;ANXA1;PLET1;HBEGF;CCR1;VEGFA;CCN1;PRCP;ENSSSCG00000025500;TMSB10;GSX2;FGF18;GPNMB;ENSSSCG00000017920
GO:0006952	defense response	http://amigo.geneontology.org/amigo/term/GO:0006952	307	29	12.411	2.33664	9.7851e-06	0.00328516	396591;396601;396724;396735;396865;396870;396886;396942;397031;397086;397094;397106;397198;397316;397339;397360;397406;406188;414370;414374;445003;445525;100048955;100127489;100154248;100233192;100316849;100515678;100523811	PLA2G1B;AGER;ENSSSCG00000006588;CHI3L1;SFTPD;IL1A;C5AR1;CCRL2;MRC1;TREM1;ANXA1;ENSSSCG00000029414;CCR1;CD163;PRCP;OLR1;PPBP;MAPKAPK3;IL10;IFIT1;F8;TNF;SLPI;MMP8;FCER1G;ZFP36;ENSSSCG00000017920;NFKBIA;CEBPB
GO:0072358	cardiovascular system development	http://amigo.geneontology.org/amigo/term/GO:0072358	168	20	6.79167	2.94479	9.8013e-06	0.00328516	396836;396865;396912;396942;397094;397106;397155;397157;397172;397311;414737;100048955;100152163;100153791;100157365;100157795;100515678;100523465;100525013;100625944	CHI3L1;CDH5;CLEC14A;IL1A;RAMP2;C5AR1;KDR;LEPR;CALCRL;RGCC;DLL4;GATA2;ANXA1;VEGFA;CCN1;TMEM100;PRCP;GJA5;IL10;FGF18
GO:0006897	endocytosis	http://amigo.geneontology.org/amigo/term/GO:0006897	127	17	5.13418	3.31114	1.00059e-05	0.00328516	396735;396836;396942;397031;397086;397155;397157;397172;397198;397406;397503;397623;404693;445003;100156908;100233192;100516298	SFTPA1;MARCO;SFTPD;RAMP2;MRC1;LEPR;CALCRL;ANXA1;SIGLEC1;CD163;VEGFA;MAPKAPK3;TNF;CAV1;FCER1G;PEAR1;ENSSSCG00000017920
GO:0007155	cell adhesion	http://amigo.geneontology.org/amigo/term/GO:0007155	228	24	9.21726	2.60381	1.03611e-05	0.00328516	396570;396591;396701;396724;396941;396942;397086;397106;397157;397311;397360;397623;404693;414737;100049669;100127489;100152685;100153791;100155660;100156908;100510966;100516257;100522817;100625944	AGER;RNASE10;TACSTD2;ENSSSCG00000006588;CDH5;CD93;ANXA9;KDR;RGCC;ANXA1;PLET1;SIGLEC1;ESAM;VEGFA;CCN1;OLR1;PLEK;IL10;PECAM1;TNF;CAV1;GPNMB;PEAR1;CEBPB
GO:0040011	locomotion	http://amigo.geneontology.org/amigo/term/GO:0040011	361	32	14.594	2.19268	1.20982e-05	0.00357334	396570;396591;396673;396701;396735;396870;396912;396942;397086;397157;397309;397311;397406;397564;414370;414374;445525;100037998;100048955;100049669;100127489;100152163;100153791;100157365;100157653;100510966;100515678;100516946;100522280;100524448;100525013;100625944	PLA2G1B;AGER;RNASE10;PIH1D3;TBX5;TACSTD2;ENSSSCG00000006588;PGK2;CLEC14A;C5AR1;CCRL2;KDR;RGCC;DLL4;SEMA3G;GATA2;ANXA1;PLET1;HBEGF;CCR1;VEGFA;CCN1;PRCP;ENSSSCG00000025500;PPBP;TNF;TMSB10;GSX2;FCER1G;FGF18;GPNMB;ENSSSCG00000017920
GO:0022610	biological adhesion	http://amigo.geneontology.org/amigo/term/GO:0022610	231	24	9.33854	2.56999	1.2982e-05	0.00357334	396570;396591;396701;396724;396941;396942;397086;397106;397157;397311;397360;397623;404693;414737;100049669;100127489;100152685;100153791;100155660;100156908;100510966;100516257;100522817;100625944	AGER;RNASE10;TACSTD2;ENSSSCG00000006588;CDH5;CD93;ANXA9;KDR;RGCC;ANXA1;PLET1;SIGLEC1;ESAM;VEGFA;CCN1;OLR1;PLEK;IL10;PECAM1;TNF;CAV1;GPNMB;PEAR1;CEBPB
GO:0060326	cell chemotaxis	http://amigo.geneontology.org/amigo/term/GO:0060326	80	13	3.23413	4.01963	1.4224e-05	0.00357334	396735;396870;396942;397157;397311;397406;397564;414370;414374;445525;100048955;100127489;100525013	PLA2G1B;ENSSSCG00000006588;C5AR1;CCRL2;KDR;ANXA1;HBEGF;CCR1;VEGFA;PPBP;FCER1G;FGF18;ENSSSCG00000017920
GO:0048870	cell motility	http://amigo.geneontology.org/amigo/term/GO:0048870	331	30	13.3812	2.24195	1.54056e-05	0.00357334	396570;396673;396701;396735;396870;396912;396942;397086;397157;397311;397406;397564;414370;414374;445525;100037998;100048955;100049669;100127489;100152163;100153791;100157365;100157653;100510966;100515678;100516946;100522280;100524448;100525013;100625944	PLA2G1B;RNASE10;PIH1D3;TBX5;TACSTD2;ENSSSCG00000006588;PGK2;CLEC14A;C5AR1;CCRL2;KDR;RGCC;DLL4;SEMA3G;GATA2;ANXA1;PLET1;HBEGF;CCR1;VEGFA;CCN1;PRCP;PPBP;TNF;TMSB10;GSX2;FCER1G;FGF18;GPNMB;ENSSSCG00000017920
GO:0051674	localization of cell	http://amigo.geneontology.org/amigo/term/GO:0051674	331	30	13.3812	2.24195	1.54056e-05	0.00357334	396570;396673;396701;396735;396870;396912;396942;397086;397157;397311;397406;397564;414370;414374;445525;100037998;100048955;100049669;100127489;100152163;100153791;100157365;100157653;100510966;100515678;100516946;100522280;100524448;100525013;100625944	PLA2G1B;RNASE10;PIH1D3;TBX5;TACSTD2;ENSSSCG00000006588;PGK2;CLEC14A;C5AR1;CCRL2;KDR;RGCC;DLL4;SEMA3G;GATA2;ANXA1;PLET1;HBEGF;CCR1;VEGFA;CCN1;PRCP;PPBP;TNF;TMSB10;GSX2;FCER1G;FGF18;GPNMB;ENSSSCG00000017920
GO:0000165	MAPK cascade	http://amigo.geneontology.org/amigo/term/GO:0000165	188	21	7.6002	2.76309	1.5778e-05	0.00357334	396591;396764;396775;396865;397086;397157;397208;397311;414374;445525;100048955;100049669;100153791;100316849;100519085;100523323;100523811;100525013;100525536;100621090;100622968	PLA2G1B;AGER;CHI3L1;C5AR1;SCIMP;CSF2;KDR;CCR1;VEGFA;CCN1;GADD45B;DUSP6;RNF149;TIMP3;TNF;MMP8;NOX4;FGF18;GPNMB;SLC11A1;ZFP36
GO:0070371	ERK1 and ERK2 cascade	http://amigo.geneontology.org/amigo/term/GO:0070371	82	13	3.31498	3.92159	1.87629e-05	0.00404852	396591;396775;396865;397208;397311;414374;100048955;100049669;100153791;100523323;100525013;100525536;100622968	AGER;CHI3L1;C5AR1;SCIMP;CSF2;KDR;CCR1;CCN1;DUSP6;TIMP3;NOX4;FGF18;GPNMB
GO:0023014	signal transduction by protein phosphorylation	http://amigo.geneontology.org/amigo/term/GO:0023014	191	21	7.72148	2.71969	2.01734e-05	0.00404852	396591;396764;396775;396865;397086;397157;397208;397311;414374;445525;100048955;100049669;100153791;100316849;100519085;100523323;100523811;100525013;100525536;100621090;100622968	PLA2G1B;AGER;CHI3L1;C5AR1;SCIMP;CSF2;KDR;CCR1;VEGFA;CCN1;GADD45B;DUSP6;RNF149;TIMP3;TNF;MMP8;NOX4;FGF18;GPNMB;SLC11A1;ZFP36
GO:0032103	positive regulation of response to external stimulus	http://amigo.geneontology.org/amigo/term/GO:0032103	71	12	2.87029	4.18077	2.04299e-05	0.00404852	396591;397086;397157;397311;397360;397406;406188;414374;100048955;100127489;100523811;100525013	AGER;ENSSSCG00000006588;C5AR1;KDR;CCR1;VEGFA;TNF;MMP8;FCER1G;FGF18;NFKBIA;CEBPB
GO:0070372	regulation of ERK1 and ERK2 cascade	http://amigo.geneontology.org/amigo/term/GO:0070372	73	12	2.95114	4.06622	2.73419e-05	0.00513868	396591;396775;396865;397311;414374;100048955;100049669;100153791;100523323;100525013;100525536;100622968	AGER;CHI3L1;C5AR1;SCIMP;KDR;CCR1;CCN1;DUSP6;TIMP3;NOX4;FGF18;GPNMB
GO:0051270	regulation of cellular component movement	http://amigo.geneontology.org/amigo/term/GO:0051270	211	22	8.53001	2.57913	2.93242e-05	0.00513868	396570;396701;396735;396912;396942;397157;397311;397564;414374;100037998;100048955;100049669;100152163;100153791;100157653;100157795;100510966;100515678;100522280;100524448;100525013;100625944	RNASE10;TBX5;TACSTD2;C5AR1;KDR;RGCC;DLL4;SEMA3G;GATA2;ANXA1;PLET1;HBEGF;CCR1;VEGFA;CCN1;PRCP;GJA5;TMSB10;GSX2;FGF18;GPNMB;ENSSSCG00000017920
GO:0098609	cell-cell adhesion	http://amigo.geneontology.org/amigo/term/GO:0098609	152	18	6.14484	2.92929	3.0375e-05	0.00513868	396591;396701;396942;397086;397106;397360;404693;414737;100049669;100127489;100152685;100153791;100155660;100156908;100510966;100516257;100522817;100625944	AGER;RNASE10;TACSTD2;ENSSSCG00000006588;CDH5;CD93;ANXA9;RGCC;ANXA1;ESAM;CCN1;PLEK;IL10;TNF;CAV1;GPNMB;PEAR1;CEBPB
GO:1901342	regulation of vasculature development	http://amigo.geneontology.org/amigo/term/GO:1901342	74	12	2.99157	4.01128	3.15038e-05	0.00513868	396865;396912;396942;397094;397106;397155;397157;397311;100048955;100523465;100525013;100625944	CHI3L1;IL1A;RAMP2;C5AR1;KDR;RGCC;GATA2;ANXA1;VEGFA;TMEM100;IL10;FGF18
GO:0002237	response to molecule of bacterial origin	http://amigo.geneontology.org/amigo/term/GO:0002237	74	12	2.99157	4.01128	3.15038e-05	0.00513868	396764;396870;396886;396959;397086;397106;397360;406188;445003;100048955;100233192;100316849	C5AR1;MRC1;PPBP;MAPKAPK3;IL10;TNF;SLPI;SLC11A1;ANKRD1;ZFP36;NFKBIA;CEBPB
GO:2000145	regulation of cell motility	http://amigo.geneontology.org/amigo/term/GO:2000145	197	21	7.96404	2.63685	3.24138e-05	0.00513868	396570;396701;396735;396912;396942;397157;397311;397564;414374;100037998;100048955;100049669;100152163;100153791;100157653;100510966;100515678;100522280;100524448;100525013;100625944	RNASE10;TBX5;TACSTD2;C5AR1;KDR;RGCC;DLL4;SEMA3G;GATA2;ANXA1;PLET1;HBEGF;CCR1;VEGFA;CCN1;PRCP;TMSB10;GSX2;FGF18;GPNMB;ENSSSCG00000017920
GO:0048646	anatomical structure formation involved in morphogenesis	http://amigo.geneontology.org/amigo/term/GO:0048646	245	24	9.90451	2.42314	3.50865e-05	0.00523473	396673;396836;396865;396912;396942;397086;397094;397106;397155;397157;397172;397311;414381;100048955;100152163;100153791;100157365;100157795;100515678;100522280;100523465;100523811;100525013;100625944	TBX5;CHI3L1;PGK2;CLEC14A;IL1A;RAMP2;C5AR1;KDR;LEPR;CALCRL;RGCC;DLL4;GATA2;ANXA1;VEGFA;CCN1;TMEM100;PRCP;GJA5;IL10;TNF;MMP8;FGF18;CFLAR
GO:0030334	regulation of cell migration	http://amigo.geneontology.org/amigo/term/GO:0030334	183	20	7.39807	2.70341	3.53168e-05	0.00523473	396570;396735;396912;396942;397157;397311;397564;414374;100037998;100048955;100049669;100152163;100153791;100157653;100510966;100515678;100522280;100524448;100525013;100625944	TBX5;TACSTD2;C5AR1;KDR;RGCC;DLL4;SEMA3G;GATA2;ANXA1;PLET1;HBEGF;CCR1;VEGFA;CCN1;PRCP;TMSB10;GSX2;FGF18;GPNMB;ENSSSCG00000017920
GO:0098657	import into cell	http://amigo.geneontology.org/amigo/term/GO:0098657	154	18	6.22569	2.89124	3.63218e-05	0.00523473	396735;396836;396942;397031;397086;397155;397157;397172;397198;397406;397503;397623;404693;445003;100156908;100233192;100516298;100518049	SFTPA1;MARCO;SFTPD;RAMP2;MRC1;LEPR;CALCRL;ANXA1;SIGLEC1;CD163;VEGFA;MAPKAPK3;TNF;FAM155B;CAV1;FCER1G;PEAR1;ENSSSCG00000017920
GO:0006898	receptor-mediated endocytosis	http://amigo.geneontology.org/amigo/term/GO:0006898	53	10	2.14261	4.66721	3.83139e-05	0.00535944	396735;397031;397155;397157;397172;397406;397623;404693;445003;100516298	MARCO;RAMP2;MRC1;CALCRL;SIGLEC1;CD163;VEGFA;CAV1;FCER1G;ENSSSCG00000017920
GO:0010033	response to organic substance	http://amigo.geneontology.org/amigo/term/GO:0010033	629	45	25.4283	1.76968	4.55551e-05	0.00619028	396591;396735;396764;396775;396836;396865;396870;396886;396942;396959;397086;397094;397106;397155;397157;397172;397311;397360;397406;397560;397648;397680;403329;404693;406188;414370;414374;445003;445525;100048955;100127153;100153791;100154248;100157795;100233192;100316849;100512825;100515678;100515895;100520726;100523323;100523465;100525013;100533477;100739731	PLA2G1B;AGER;SHISA2;CHI3L1;IL1A;RAMP2;C5AR1;CCRL2;MRC1;KDR;LEPR;CALCRL;TSHR;ANXA1;CYP11A1;LMO2;GPIHBP1;MCL1;P2RY11;CCR1;VEGFA;CCN1;TMEM100;PRCP;GJA5;EGR1;PPBP;MAPKAPK3;IL10;IFIT1;TIMP3;NR0B1;TNF;SLPI;AQP9;NOX4;CAV1;FCER1G;FGF18;SLC11A1;ANKRD1;ZFP36;ENSSSCG00000017920;NFKBIA;CEBPB
GO:0035239	tube morphogenesis	http://amigo.geneontology.org/amigo/term/GO:0035239	202	21	8.16617	2.57158	4.73249e-05	0.00625215	396836;396865;396912;396942;397086;397094;397106;397155;397157;397172;397311;100048955;100152163;100153791;100157365;100157795;100510966;100515678;100523465;100525013;100625944	TACSTD2;CHI3L1;CLEC14A;IL1A;RAMP2;C5AR1;KDR;LEPR;CALCRL;RGCC;DLL4;GATA2;ANXA1;VEGFA;CCN1;TMEM100;PRCP;GJA5;IL10;TNF;FGF18
GO:0002526	acute inflammatory response	http://amigo.geneontology.org/amigo/term/GO:0002526	26	7	1.05109	6.65975	5.32798e-05	0.00684862	396601;397031;397086;397094;397339;397406;100515678	IL1A;TREM1;CD163;PRCP;F8;TNF;FCER1G
GO:0045765	regulation of angiogenesis	http://amigo.geneontology.org/amigo/term/GO:0045765	67	11	2.70858	4.06117	6.05208e-05	0.00757465	396865;396912;396942;397094;397106;397155;397157;397311;100048955;100525013;100625944	CHI3L1;IL1A;RAMP2;C5AR1;KDR;RGCC;GATA2;ANXA1;VEGFA;IL10;FGF18
GO:0016477	cell migration	http://amigo.geneontology.org/amigo/term/GO:0016477	305	27	12.3301	2.18976	6.68242e-05	0.00814912	396570;396735;396870;396912;396942;397086;397157;397311;397406;397564;414370;414374;445525;100037998;100048955;100049669;100127489;100152163;100153791;100157365;100157653;100510966;100515678;100522280;100524448;100525013;100625944	PLA2G1B;TBX5;TACSTD2;ENSSSCG00000006588;CLEC14A;C5AR1;CCRL2;KDR;RGCC;DLL4;SEMA3G;GATA2;ANXA1;PLET1;HBEGF;CCR1;VEGFA;CCN1;PRCP;PPBP;TNF;TMSB10;GSX2;FCER1G;FGF18;GPNMB;ENSSSCG00000017920
GO:2000351	regulation of endothelial cell apoptotic process	http://amigo.geneontology.org/amigo/term/GO:2000351	19	6	0.768105	7.81143	6.97189e-05	0.00828958	396912;397086;397106;397155;397311;100625944	RAMP2;KDR;RGCC;GATA2;IL10;TNF
GO:0009611	response to wounding	http://amigo.geneontology.org/amigo/term/GO:0009611	107	14	4.32564	3.23651	8.18346e-05	0.00935627	396570;396591;396942;397094;397106;397339;397406;397564;414381;100153791;100156908;100316849;100515678;100516257	AGER;IL1A;ANXA1;PLET1;HBEGF;CCN1;PRCP;PLEK;IL10;F8;FCER1G;PEAR1;CFLAR;ZFP36
GO:0070887	cellular response to chemical stimulus	http://amigo.geneontology.org/amigo/term/GO:0070887	664	46	26.8433	1.71365	8.26248e-05	0.00935627	396591;396735;396775;396836;396865;396870;396942;396959;397086;397094;397106;397155;397157;397172;397311;397360;397406;397560;397564;397648;397680;403329;404693;406188;414370;414374;445003;445525;100048955;100127153;100127489;100153791;100154248;100157795;100316849;100512825;100515678;100516055;100519085;100520726;100523323;100523465;100525013;100533477;100625944;100739731	PLA2G1B;AGER;ENSSSCG00000006588;SHISA2;CHI3L1;IL1A;RAMP2;C5AR1;CCRL2;MRC1;KDR;LEPR;CALCRL;RGCC;TSHR;ANXA1;CYP11A1;LMO2;MCL1;HBEGF;P2RY11;CCR1;VEGFA;CCN1;TMEM100;PRCP;GJA5;EGR1;RNF149;PPBP;IL10;IFIT1;TIMP3;NR0B1;TNF;AQP9;NOX4;CAV1;CLIC2;FCER1G;FGF18;ANKRD1;ZFP36;ENSSSCG00000017920;NFKBIA;CEBPB
GO:0010632	regulation of epithelial cell migration	http://amigo.geneontology.org/amigo/term/GO:0010632	58	10	2.34474	4.26486	8.60632e-05	0.00946499	396912;396942;397157;397311;397564;100152163;100510966;100515678;100525013;100625944	TACSTD2;KDR;RGCC;DLL4;GATA2;ANXA1;HBEGF;VEGFA;PRCP;FGF18
GO:0035295	tube development	http://amigo.geneontology.org/amigo/term/GO:0035295	243	23	9.82366	2.34129	8.92989e-05	0.00946499	396836;396865;396912;396942;397086;397094;397106;397155;397157;397172;397198;397311;100048955;100152163;100153791;100157365;100157795;100510966;100515678;100522280;100523465;100525013;100625944	TBX5;TACSTD2;CHI3L1;SFTPD;CLEC14A;IL1A;RAMP2;C5AR1;KDR;LEPR;CALCRL;RGCC;DLL4;GATA2;ANXA1;VEGFA;CCN1;TMEM100;PRCP;GJA5;IL10;TNF;FGF18
GO:0002040	sprouting angiogenesis	http://amigo.geneontology.org/amigo/term/GO:0002040	28	7	1.13194	6.18405	8.95552e-05	0.00946499	396912;396942;397106;397155;397157;397311;100157365	CLEC14A;RAMP2;KDR;GATA2;ANXA1;VEGFA;IL10
GO:0032496	response to lipopolysaccharide	http://amigo.geneontology.org/amigo/term/GO:0032496	70	11	2.82986	3.88712	9.1714e-05	0.00948243	396764;396870;396886;396959;397086;397106;397360;406188;445003;100233192;100316849	MRC1;PPBP;MAPKAPK3;IL10;TNF;SLPI;SLC11A1;ANKRD1;ZFP36;NFKBIA;CEBPB
GO:0072577	endothelial cell apoptotic process	http://amigo.geneontology.org/amigo/term/GO:0072577	20	6	0.808532	7.42086	9.62926e-05	0.00974399	396912;397086;397106;397155;397311;100625944	RAMP2;KDR;RGCC;GATA2;IL10;TNF
GO:0006935	chemotaxis	http://amigo.geneontology.org/amigo/term/GO:0006935	123	15	4.97247	3.01661	0.000103251	0.0102305	396591;396735;396870;396942;397157;397311;397406;397564;414370;414374;445525;100048955;100127489;100157653;100525013	PLA2G1B;AGER;ENSSSCG00000006588;C5AR1;CCRL2;KDR;SEMA3G;ANXA1;HBEGF;CCR1;VEGFA;PPBP;FCER1G;FGF18;ENSSSCG00000017920
GO:0009617	response to bacterium	http://amigo.geneontology.org/amigo/term/GO:0009617	138	16	5.57887	2.86796	0.000111343	0.0104401	396764;396870;396886;396959;397086;397106;397360;397406;406188;414381;445003;445525;100048955;100154248;100233192;100316849	PLA2G1B;C5AR1;MRC1;PPBP;MAPKAPK3;IL10;IFIT1;TNF;SLPI;FCER1G;SLC11A1;ANKRD1;CFLAR;ZFP36;NFKBIA;CEBPB
GO:0042330	taxis	http://amigo.geneontology.org/amigo/term/GO:0042330	124	15	5.0129	2.99228	0.00011338	0.0104401	396591;396735;396870;396942;397157;397311;397406;397564;414370;414374;445525;100048955;100127489;100157653;100525013	PLA2G1B;AGER;ENSSSCG00000006588;C5AR1;CCRL2;KDR;SEMA3G;ANXA1;HBEGF;CCR1;VEGFA;PPBP;FCER1G;FGF18;ENSSSCG00000017920
GO:0043408	regulation of MAPK cascade	http://amigo.geneontology.org/amigo/term/GO:0043408	168	18	6.79167	2.65031	0.00011594	0.0104401	396591;396775;396865;397086;397157;397311;414374;445525;100048955;100049669;100153791;100519085;100523323;100523811;100525013;100525536;100621090;100622968	PLA2G1B;AGER;CHI3L1;C5AR1;SCIMP;KDR;CCR1;VEGFA;CCN1;GADD45B;DUSP6;RNF149;TIMP3;TNF;MMP8;NOX4;FGF18;GPNMB
GO:0043542	endothelial cell migration	http://amigo.geneontology.org/amigo/term/GO:0043542	49	9	1.9809	4.54338	0.000118008	0.0104401	396912;396942;397157;397311;100152163;100157365;100515678;100525013;100625944	CLEC14A;KDR;RGCC;DLL4;GATA2;ANXA1;VEGFA;PRCP;FGF18
GO:0010631	epithelial cell migration	http://amigo.geneontology.org/amigo/term/GO:0010631	72	11	2.91071	3.77914	0.00011941	0.0104401	396912;396942;397157;397311;397564;100152163;100157365;100510966;100515678;100525013;100625944	TACSTD2;CLEC14A;KDR;RGCC;DLL4;GATA2;ANXA1;HBEGF;VEGFA;PRCP;FGF18
GO:0090132	epithelium migration	http://amigo.geneontology.org/amigo/term/GO:0090132	72	11	2.91071	3.77914	0.00011941	0.0104401	396912;396942;397157;397311;397564;100152163;100157365;100510966;100515678;100525013;100625944	TACSTD2;CLEC14A;KDR;RGCC;DLL4;GATA2;ANXA1;HBEGF;VEGFA;PRCP;FGF18
GO:0035556	intracellular signal transduction	http://amigo.geneontology.org/amigo/term/GO:0035556	575	41	23.2453	1.7638	0.000120733	0.0104401	396591;396764;396775;396865;396959;397086;397155;397157;397172;397208;397311;397360;397560;397564;397648;406188;414370;414374;414381;445525;100048955;100049669;100127489;100144496;100152734;100153791;100156358;100156908;100233192;100316849;100516055;100516257;100519085;100523323;100523465;100523811;100525013;100525536;100533477;100621090;100622968	PLA2G1B;AGER;ENSSSCG00000006588;CHI3L1;ARHGAP29;RAMP2;C5AR1;CCRL2;SCIMP;CSF2;KDR;CALCRL;TSHR;MCL1;HBEGF;P2RY11;CCR1;VEGFA;CCN1;TMEM100;GADD45B;S100A4;DUSP6;RNF149;PLEK;MAPKAPK3;TIMP3;TNF;RAB32;MMP8;NOX4;CLIC2;FGF18;GPNMB;PEAR1;SLC11A1;ANKRD1;CFLAR;ZFP36;NFKBIA;CEBPB
GO:0010594	regulation of endothelial cell migration	http://amigo.geneontology.org/amigo/term/GO:0010594	39	8	1.57664	5.07409	0.000126583	0.0107505	396912;396942;397157;397311;100152163;100515678;100525013;100625944	KDR;RGCC;DLL4;GATA2;ANXA1;VEGFA;PRCP;FGF18
GO:0050729	positive regulation of inflammatory response	http://amigo.geneontology.org/amigo/term/GO:0050729	30	7	1.2128	5.77178	0.000143794	0.011998	396591;397086;397360;397406;406188;100127489;100523811	AGER;ENSSSCG00000006588;TNF;MMP8;FCER1G;NFKBIA;CEBPB
GO:0040017	positive regulation of locomotion	http://amigo.geneontology.org/amigo/term/GO:0040017	127	15	5.13418	2.9216	0.000149151	0.0121857	396570;396591;396701;396735;396912;396942;397157;397311;397564;414374;100048955;100049669;100153791;100157653;100525013	AGER;RNASE10;C5AR1;KDR;SEMA3G;GATA2;ANXA1;PLET1;HBEGF;CCR1;VEGFA;CCN1;FGF18;GPNMB;ENSSSCG00000017920
GO:1903672	positive regulation of sprouting angiogenesis	http://amigo.geneontology.org/amigo/term/GO:1903672	14	5	0.565972	8.83436	0.000151168	0.0121857	396912;396942;397106;397157;397311	KDR;GATA2;ANXA1;VEGFA;IL10
GO:1904035	regulation of epithelial cell apoptotic process	http://amigo.geneontology.org/amigo/term/GO:1904035	22	6	0.889385	6.74624	0.000173273	0.0135805	396912;397086;397106;397155;397311;100625944	RAMP2;KDR;RGCC;GATA2;IL10;TNF
GO:0090130	tissue migration	http://amigo.geneontology.org/amigo/term/GO:0090130	75	11	3.03199	3.62798	0.000174182	0.0135805	396912;396942;397157;397311;397564;100152163;100157365;100510966;100515678;100525013;100625944	TACSTD2;CLEC14A;KDR;RGCC;DLL4;GATA2;ANXA1;HBEGF;VEGFA;PRCP;FGF18
GO:0071310	cellular response to organic substance	http://amigo.geneontology.org/amigo/term/GO:0071310	527	38	21.3048	1.78363	0.000182149	0.0139726	396591;396775;396836;396865;396870;396942;396959;397086;397094;397106;397155;397157;397172;397311;397360;397406;397560;397680;403329;404693;406188;414370;414374;445003;445525;100127153;100153791;100154248;100157795;100316849;100512825;100515678;100520726;100523323;100523465;100525013;100533477;100739731	PLA2G1B;AGER;SHISA2;CHI3L1;IL1A;RAMP2;CCRL2;MRC1;KDR;LEPR;CALCRL;TSHR;ANXA1;CYP11A1;LMO2;P2RY11;CCR1;VEGFA;CCN1;TMEM100;PRCP;GJA5;EGR1;PPBP;IL10;IFIT1;TIMP3;NR0B1;TNF;AQP9;NOX4;CAV1;FCER1G;FGF18;ANKRD1;ZFP36;NFKBIA;CEBPB
GO:0006928	movement of cell or subcellular component	http://amigo.geneontology.org/amigo/term/GO:0006928	400	31	16.1706	1.91706	0.000227649	0.0171857	396570;396673;396701;396735;396870;396912;396942;397086;397157;397311;397406;397564;414370;414374;445525;100037998;100048955;100049669;100127489;100152163;100153791;100157365;100157653;100157795;100510966;100515678;100516946;100522280;100524448;100525013;100625944	PLA2G1B;RNASE10;PIH1D3;TBX5;TACSTD2;ENSSSCG00000006588;PGK2;CLEC14A;C5AR1;CCRL2;KDR;RGCC;DLL4;SEMA3G;GATA2;ANXA1;PLET1;HBEGF;CCR1;VEGFA;CCN1;PRCP;GJA5;PPBP;TNF;TMSB10;GSX2;FCER1G;FGF18;GPNMB;ENSSSCG00000017920
GO:0043410	positive regulation of MAPK cascade	http://amigo.geneontology.org/amigo/term/GO:0043410	118	14	4.77034	2.9348	0.000238032	0.0174166	396591;396865;397086;397157;397311;414374;445525;100048955;100049669;100523323;100523811;100525013;100525536;100621090	PLA2G1B;AGER;CHI3L1;C5AR1;SCIMP;KDR;CCR1;VEGFA;GADD45B;TNF;MMP8;NOX4;FGF18;GPNMB
GO:0071363	cellular response to growth factor stimulus	http://amigo.geneontology.org/amigo/term/GO:0071363	118	14	4.77034	2.9348	0.000238032	0.0174166	396942;396959;397106;397155;397157;397311;404693;100153791;100157795;100316849;100520726;100523465;100525013;100739731	SHISA2;RAMP2;KDR;ANXA1;VEGFA;CCN1;TMEM100;GJA5;EGR1;IL10;CAV1;FGF18;ANKRD1;ZFP36
GO:2000147	positive regulation of cell motility	http://amigo.geneontology.org/amigo/term/GO:2000147	119	14	4.81076	2.91014	0.000260408	0.0187652	396570;396701;396735;396912;396942;397157;397311;397564;414374;100048955;100049669;100153791;100157653;100525013	RNASE10;C5AR1;KDR;SEMA3G;GATA2;ANXA1;PLET1;HBEGF;CCR1;VEGFA;CCN1;FGF18;GPNMB;ENSSSCG00000017920
GO:0051179	localization	http://amigo.geneontology.org/amigo/term/GO:0051179	1351	76	54.6163	1.39153	0.000267275	0.0189725	396570;396591;396673;396701;396735;396764;396836;396865;396870;396912;396942;396959;397031;397086;397094;397106;397155;397157;397172;397198;397311;397360;397406;397410;397413;397503;397564;397623;397680;404693;406188;414370;414374;445003;445525;541593;100037998;100048955;100049669;100126278;100127153;100127489;100144496;100144510;100152163;100152253;100153791;100155736;100155871;100156288;1001568…	PLA2G1B;AGER;RNASE10;PIH1D3;SFTPA1;TBX5;GJB7;TACSTD2;ENSSSCG00000006588;NPC2;GABRP;MARCO;CHI3L1;PGK2;AQP5;TOMM34;SFTPD;CLEC14A;SLCO4C1;IL1A;RAMP2;C5AR1;ATP6V0D2;CCRL2;ENSSSCG00000015084;MRC1;KDR;SLC31A2;LEPR;SLC16A9;CALCRL;RGCC;LIPG;TAPT1;DLL4;SEMA3G;GATA2;ANXA1;PLET1;SIGLEC1;HBEGF;CCR1;CD163;VEGFA;CCN1;PRCP;GJA5;ENSSSCG00000024666;PLEK;PPBP;MAPKAPK3;IL10;NR0B1;TNF;TMSB10;FAM155B;SLC15A3;STX11;RA…
GO:0042060	wound healing	http://amigo.geneontology.org/amigo/term/GO:0042060	92	12	3.71925	3.22646	0.000276356	0.0190749	396570;396591;396942;397094;397339;397406;397564;414381;100153791;100156908;100515678;100516257	AGER;IL1A;ANXA1;PLET1;HBEGF;CCN1;PRCP;PLEK;F8;FCER1G;PEAR1;CFLAR
GO:0035924	cellular response to vascular endothelial growth factor stimulus	http://amigo.geneontology.org/amigo/term/GO:0035924	9	4	0.363839	10.9939	0.000276738	0.0190749	396942;397155;397157;397311	RAMP2;KDR;ANXA1;VEGFA
GO:0070848	response to growth factor	http://amigo.geneontology.org/amigo/term/GO:0070848	120	14	4.85119	2.88589	0.000284573	0.0193347	396942;396959;397106;397155;397157;397311;404693;100153791;100157795;100316849;100520726;100523465;100525013;100739731	SHISA2;RAMP2;KDR;ANXA1;VEGFA;CCN1;TMEM100;GJA5;EGR1;IL10;CAV1;FGF18;ANKRD1;ZFP36
GO:0030595	leukocyte chemotaxis	http://amigo.geneontology.org/amigo/term/GO:0030595	55	9	2.22346	4.04774	0.000296446	0.0198577	396735;396870;396942;397157;397406;414374;445525;100048955;100127489	PLA2G1B;ENSSSCG00000006588;C5AR1;ANXA1;CCR1;VEGFA;PPBP;FCER1G;ENSSSCG00000017920
GO:0002042	cell migration involved in sprouting angiogenesis	http://amigo.geneontology.org/amigo/term/GO:0002042	16	5	0.646825	7.73006	0.000308762	0.0203954	396912;396942;397157;397311;100157365	CLEC14A;KDR;GATA2;ANXA1;VEGFA
GO:0032101	regulation of response to external stimulus	http://amigo.geneontology.org/amigo/term/GO:0032101	166	17	6.71081	2.53322	0.000314017	0.0204584	396591;396942;397086;397106;397157;397311;397360;397406;406188;414374;100048955;100127489;100157653;100316849;100516257;100523811;100525013	AGER;ENSSSCG00000006588;C5AR1;KDR;SEMA3G;ANXA1;CCR1;VEGFA;PLEK;IL10;TNF;MMP8;FCER1G;FGF18;ZFP36;NFKBIA;CEBPB
GO:0051272	positive regulation of cellular component movement	http://amigo.geneontology.org/amigo/term/GO:0051272	122	14	4.93204	2.83858	0.000338734	0.0217705	396570;396701;396735;396912;396942;397157;397311;397564;414374;100048955;100049669;100153791;100157653;100525013	RNASE10;C5AR1;KDR;SEMA3G;GATA2;ANXA1;PLET1;HBEGF;CCR1;VEGFA;CCN1;FGF18;GPNMB;ENSSSCG00000017920
GO:0006909	phagocytosis	http://amigo.geneontology.org/amigo/term/GO:0006909	45	8	1.8192	4.39755	0.000360535	0.0225959	396836;396942;397086;397198;397406;397503;397623;100156908	SFTPA1;SFTPD;LEPR;ANXA1;SIGLEC1;TNF;FCER1G;PEAR1
GO:0042127	regulation of cell proliferation	http://amigo.geneontology.org/amigo/term/GO:0042127	337	27	13.6238	1.98183	0.000361079	0.0225959	396591;396912;396942;397086;397094;397106;397157;397172;397208;397311;397360;397564;404693;406188;414381;445525;654407;100048955;100049669;100152163;100153791;100154248;100510966;100522280;100523323;100525013;100625944	PLA2G1B;AGER;TBX5;TACSTD2;IL1A;C5AR1;CSF2;KDR;CALCRL;RGCC;DLL4;GATA2;ANXA1;HBEGF;VEGFA;CCN1;IL10;IFIT1;TNF;NOX4;CAV1;FGF18;GPNMB;CFLAR;PTGES;NFKBIA;CEBPB
GO:1904019	epithelial cell apoptotic process	http://amigo.geneontology.org/amigo/term/GO:1904019	25	6	1.01066	5.93669	0.000371758	0.0228778	396912;397086;397106;397155;397311;100625944	RAMP2;KDR;RGCC;GATA2;IL10;TNF
GO:0042221	response to chemical	http://amigo.geneontology.org/amigo/term/GO:0042221	853	53	34.4839	1.53695	0.000375204	0.0228778	396591;396735;396764;396775;396836;396865;396870;396886;396942;396959;397086;397094;397106;397155;397157;397172;397309;397311;397360;397406;397560;397564;397648;397680;403329;404693;406188;414370;414374;445003;445525;100048955;100126278;100127153;100127489;100153791;100154248;100157653;100157795;100233192;100316849;100512825;100515678;100515895;100516055;100519085;100520726;100523323;100523465;10…	PLA2G1B;AGER;ENSSSCG00000006588;SHISA2;CHI3L1;AQP5;IL1A;RAMP2;C5AR1;CCRL2;MRC1;KDR;LEPR;CALCRL;RGCC;TSHR;SEMA3G;ANXA1;CYP11A1;LMO2;GPIHBP1;MCL1;HBEGF;P2RY11;CCR1;VEGFA;CCN1;TMEM100;PRCP;ENSSSCG00000025500;GJA5;EGR1;RNF149;PPBP;MAPKAPK3;IL10;IFIT1;TIMP3;NR0B1;TNF;SLPI;AQP9;NOX4;CAV1;CLIC2;FCER1G;FGF18;SLC11A1;ANKRD1;ZFP36;ENSSSCG00000017920;NFKBIA;CEBPB
GO:0097529	myeloid leukocyte migration	http://amigo.geneontology.org/amigo/term/GO:0097529	46	8	1.85962	4.30195	0.000421647	0.0251613	396870;396942;397157;397406;414374;445525;100048955;100127489	PLA2G1B;ENSSSCG00000006588;C5AR1;ANXA1;CCR1;VEGFA;PPBP;FCER1G
GO:0043536	positive regulation of blood vessel endothelial cell migration	http://amigo.geneontology.org/amigo/term/GO:0043536	17	5	0.687252	7.27535	0.000423235	0.0251613	396912;396942;397157;397311;100525013	KDR;GATA2;ANXA1;VEGFA;FGF18
GO:0090050	positive regulation of cell migration involved in sprouting angiogenesis	http://amigo.geneontology.org/amigo/term/GO:0090050	10	4	0.404266	9.89448	0.000446751	0.0256336	396912;396942;397157;397311	KDR;GATA2;ANXA1;VEGFA
GO:0003209	cardiac atrium morphogenesis	http://amigo.geneontology.org/amigo/term/GO:0003209	10	4	0.404266	9.89448	0.000446751	0.0256336	100152163;100153791;100157795;100522280	TBX5;DLL4;CCN1;GJA5
GO:0070374	positive regulation of ERK1 and ERK2 cascade	http://amigo.geneontology.org/amigo/term/GO:0070374	58	9	2.34474	3.83838	0.000447348	0.0256336	396591;396865;397311;414374;100048955;100049669;100523323;100525013;100525536	AGER;CHI3L1;C5AR1;SCIMP;KDR;CCR1;NOX4;FGF18;GPNMB
GO:0030335	positive regulation of cell migration	http://amigo.geneontology.org/amigo/term/GO:0030335	111	13	4.48735	2.89703	0.000454088	0.02571	396570;396735;396912;396942;397157;397311;397564;414374;100048955;100049669;100153791;100157653;100525013	C5AR1;KDR;SEMA3G;GATA2;ANXA1;PLET1;HBEGF;CCR1;VEGFA;CCN1;FGF18;GPNMB;ENSSSCG00000017920
GO:0032879	regulation of localization	http://amigo.geneontology.org/amigo/term/GO:0032879	574	39	23.2049	1.68068	0.000514581	0.0285123	396570;396701;396735;396912;396942;396959;397086;397094;397106;397157;397198;397311;397360;397406;397413;397503;397564;397623;406188;414374;445525;541593;100037998;100048955;100049669;100152163;100153791;100155736;100157653;100157795;100510966;100514386;100515678;100516055;100522280;100523811;100524448;100525013;100625944	PLA2G1B;RNASE10;SFTPA1;TBX5;TACSTD2;SFTPD;IL1A;C5AR1;ENSSSCG00000015084;KDR;SLC31A2;RGCC;LIPG;DLL4;SEMA3G;GATA2;ANXA1;PLET1;SIGLEC1;HBEGF;CCR1;VEGFA;CCN1;PRCP;GJA5;ENSSSCG00000024666;IL10;TNF;TMSB10;MMP8;GSX2;CLIC2;FCER1G;FGF18;GPNMB;ANKRD1;ENSSSCG00000017920;NFKBIA;CEBPB
GO:1902533	positive regulation of intracellular signal transduction	http://amigo.geneontology.org/amigo/term/GO:1902533	222	20	8.9747	2.22849	0.000515572	0.0285123	396591;396865;396959;397086;397157;397311;397564;397648;414374;414381;445525;100048955;100049669;100127489;100156358;100523323;100523811;100525013;100525536;100621090	PLA2G1B;AGER;ENSSSCG00000006588;CHI3L1;C5AR1;SCIMP;KDR;MCL1;HBEGF;CCR1;VEGFA;GADD45B;S100A4;TNF;MMP8;NOX4;FGF18;GPNMB;ANKRD1;CFLAR
GO:0048771	tissue remodeling	http://amigo.geneontology.org/amigo/term/GO:0048771	48	8	1.94048	4.1227	0.000569162	0.0311142	396591;396836;396942;397094;100049669;100152163;100157795;100523323	AGER;IL1A;LEPR;DLL4;ANXA1;GJA5;NOX4;GPNMB
GO:0048878	chemical homeostasis	http://amigo.geneontology.org/amigo/term/GO:0048878	258	22	10.4301	2.10929	0.000576683	0.0311671	396591;396764;396836;397198;397311;397410;397503;404693;414370;414374;445525;100048955;100155736;100157795;100514386;100515678;100515895;100516055;100518049;100521494;100522855;100523323	PLA2G1B;AGER;SFTPA1;NPC2;SFTPD;C5AR1;ATP6V0D2;CCRL2;KDR;HK3;SLC31A2;LEPR;LIPG;GPIHBP1;CCR1;PRCP;GJA5;FAM155B;NOX4;CAV1;CLIC2;SLC11A1
GO:0001667	ameboidal-type cell migration	http://amigo.geneontology.org/amigo/term/GO:0001667	100	12	4.04266	2.96834	0.000603863	0.0322693	396912;396942;397157;397311;397564;100152163;100157365;100157653;100510966;100515678;100525013;100625944	TACSTD2;CLEC14A;KDR;RGCC;DLL4;SEMA3G;GATA2;ANXA1;HBEGF;VEGFA;PRCP;FGF18
GO:0051094	positive regulation of developmental process	http://amigo.geneontology.org/amigo/term/GO:0051094	296	24	11.9663	2.00564	0.000669516	0.0347763	396591;396865;396912;396942;397086;397094;397106;397155;397157;397208;397311;397360;414374;100048955;100153791;100156794;100316849;100510966;100512657;100522280;100523465;100524448;100525013;100625944	AGER;TBX5;TACSTD2;WIF1;CHI3L1;IL1A;RAMP2;C5AR1;CSF2;KDR;RGCC;GATA2;ANXA1;RBM19;CCR1;VEGFA;CCN1;TMEM100;IL10;TNF;GSX2;FGF18;ZFP36;CEBPB
GO:0001936	regulation of endothelial cell proliferation	http://amigo.geneontology.org/amigo/term/GO:0001936	38	7	1.53621	4.55667	0.00067837	0.0347763	396912;397086;397106;397157;397311;404693;100625944	KDR;RGCC;GATA2;VEGFA;IL10;TNF;CAV1
GO:0006953	acute-phase response	http://amigo.geneontology.org/amigo/term/GO:0006953	11	4	0.444692	8.99498	0.000680025	0.0347763	397031;397086;397094;397339	IL1A;CD163;F8;TNF
GO:0003230	cardiac atrium development	http://amigo.geneontology.org/amigo/term/GO:0003230	11	4	0.444692	8.99498	0.000680025	0.0347763	100152163;100153791;100157795;100522280	TBX5;DLL4;CCN1;GJA5
GO:0009966	regulation of signal transduction	http://amigo.geneontology.org/amigo/term/GO:0009966	664	43	26.8433	1.60189	0.000700852	0.0354601	396591;396735;396775;396865;396870;396912;396959;397086;397094;397106;397155;397157;397208;397311;397564;397648;397680;404693;406188;414374;414381;445525;100048955;100049669;100127489;100152163;100153791;100156358;100156908;100515678;100516055;100516257;100519085;100520726;100523323;100523465;100523811;100524448;100525013;100525536;100621090;100622968;100739731	PLA2G1B;AGER;ENSSSCG00000006588;SHISA2;CHI3L1;IL1A;RAMP2;C5AR1;SCIMP;CSF2;KDR;DLL4;GATA2;MCL1;HBEGF;CCR1;VEGFA;CCN1;TMEM100;GADD45B;S100A4;PRCP;EGR1;DUSP6;RNF149;PLEK;PPBP;IL10;TIMP3;NR0B1;TNF;MMP8;NOX4;CAV1;GSX2;CLIC2;FGF18;GPNMB;PEAR1;ANKRD1;CFLAR;ENSSSCG00000017920;NFKBIA
GO:1903670	regulation of sprouting angiogenesis	http://amigo.geneontology.org/amigo/term/GO:1903670	19	5	0.768105	6.50953	0.000744656	0.0372798	396912;396942;397106;397157;397311	KDR;GATA2;ANXA1;VEGFA;IL10
GO:0050727	regulation of inflammatory response	http://amigo.geneontology.org/amigo/term/GO:0050727	76	10	3.07242	3.25476	0.000839457	0.0415881	396591;396942;397086;397106;397360;397406;406188;100127489;100316849;100523811	AGER;ENSSSCG00000006588;ANXA1;IL10;TNF;MMP8;FCER1G;ZFP36;NFKBIA;CEBPB
GO:0043491	protein kinase B signaling	http://amigo.geneontology.org/amigo/term/GO:0043491	51	8	2.06176	3.88019	0.000866203	0.0424707	396865;397086;397208;397311;397564;100156908;100523323;100523465	CHI3L1;CSF2;KDR;HBEGF;TMEM100;TNF;NOX4;PEAR1
GO:0009719	response to endogenous stimulus	http://amigo.geneontology.org/amigo/term/GO:0009719	320	25	12.9365	1.93252	0.000890318	0.0431451	396591;396836;396942;396959;397086;397106;397155;397360;397406;397560;397680;403329;404693;445525;100127153;100153791;100157795;100316849;100512825;100515678;100520726;100523465;100525013;100533477;100739731	PLA2G1B;AGER;SHISA2;RAMP2;LEPR;TSHR;ANXA1;CYP11A1;LMO2;P2RY11;CCN1;TMEM100;PRCP;GJA5;EGR1;IL10;NR0B1;TNF;AQP9;CAV1;FCER1G;FGF18;ANKRD1;ZFP36;CEBPB
GO:0002376	immune system process	http://amigo.geneontology.org/amigo/term/GO:0002376	530	36	21.4261	1.68019	0.000898101	0.0431451	396591;396724;396735;396836;396870;396886;396912;396942;397086;397094;397106;397157;397198;397208;397316;397360;397406;404693;406188;407745;414370;414374;445003;445525;100048955;100049669;100127489;100135050;100152163;100154248;100233192;100316849;100516257;100520726;100523811;100625944	PLA2G1B;AGER;ENSSSCG00000006588;SFTPD;IL1A;C5AR1;CCRL2;CSF2;MRC1;LEPR;RGCC;DLL4;TYR;GATA2;ANXA1;SLA-DMB;ENSSSCG00000029414;CCR1;VEGFA;OLR1;EGR1;PLEK;PPBP;MAPKAPK3;IL10;IFIT1;TNF;SLPI;MMP8;CAV1;FCER1G;GPNMB;ZFP36;ENSSSCG00000017920;NFKBIA;CEBPB
GO:0050900	leukocyte migration	http://amigo.geneontology.org/amigo/term/GO:0050900	77	10	3.11285	3.21249	0.00093169	0.0440825	396735;396870;396942;397086;397157;397406;414374;445525;100048955;100127489	PLA2G1B;ENSSSCG00000006588;C5AR1;ANXA1;CCR1;VEGFA;PPBP;TNF;FCER1G;ENSSSCG00000017920
GO:0001935	endothelial cell proliferation	http://amigo.geneontology.org/amigo/term/GO:0001935	40	7	1.61706	4.32883	0.00093615	0.0440825	396912;397086;397106;397157;397311;404693;100625944	KDR;RGCC;GATA2;VEGFA;IL10;TNF;CAV1
GO:2000352	negative regulation of endothelial cell apoptotic process	http://amigo.geneontology.org/amigo/term/GO:2000352	12	4	0.485119	8.2454	0.000988093	0.0460722	396912;397106;397155;397311	RAMP2;KDR;GATA2;IL10
GO:0030155	regulation of cell adhesion	http://amigo.geneontology.org/amigo/term/GO:0030155	136	14	5.49802	2.54637	0.00102713	0.0470454	396570;396591;396701;396942;397086;397106;397157;397311;397360;404693;100049669;100153791;100510966;100625944	AGER;RNASE10;TACSTD2;KDR;RGCC;ANXA1;PLET1;VEGFA;CCN1;IL10;TNF;CAV1;GPNMB;CEBPB
GO:0071495	cellular response to endogenous stimulus	http://amigo.geneontology.org/amigo/term/GO:0071495	287	23	11.6024	1.98234	0.00102875	0.0470454	396591;396836;396942;396959;397086;397155;397360;397560;397680;403329;404693;445525;100127153;100153791;100157795;100316849;100512825;100515678;100520726;100523465;100525013;100533477;100739731	PLA2G1B;AGER;SHISA2;RAMP2;LEPR;TSHR;ANXA1;CYP11A1;LMO2;P2RY11;CCN1;TMEM100;PRCP;GJA5;EGR1;NR0B1;TNF;AQP9;CAV1;FGF18;ANKRD1;ZFP36;CEBPB
GO:0071621	granulocyte chemotaxis	http://amigo.geneontology.org/amigo/term/GO:0071621	30	6	1.2128	4.94724	0.00105372	0.0477283	396870;396942;397406;445525;100048955;100127489	PLA2G1B;ENSSSCG00000006588;C5AR1;ANXA1;PPBP;FCER1G
Muscle
geneSet	description	link	size	overlap	expect	enrichmentRatio	pValue	FDR	overlapId	userId
GO:0072521	purine-containing compound metabolic process	http://amigo.geneontology.org/amigo/term/GO:0072521	152	48	12.3274	3.89377	0	0	396823;396950;397602;397690;399539;407608;492822;494561;574054;692156;733601;733605;733678;100037979;100037988;100037990;100038002;100048954;100134963;100152612;100153818;100154130;100154573;100154777;100154817;100155687;100156967;100157582;100157880;100170131;100188980;100286778;100294678;100516042;100516402;100517744;100521423;100521478;100522515;100522783;100523840;100524308;100524676;10052487…	ENO3;ATP5MC2;SDHC;PGAM2;PDHA1;COX7C;NDUFB9;UQCR10;SUCLG1;ATP5PO;ATP5MC1;COX5B;ATP5F1A;ATP5IF1;MPC2;ACAT1;COX5A;NUDT7;TPI1;PDK4;UQCRQ;NDUFS1;ENSSSCG00000034019;PDHB;ENSSSCG00000007524;AK1;CYCS;C7H6orf125;PGK1;PFKM;ENSSSCG00000003903;ATP5PB;NDUFB6;ATP5ME;SDHD;TEFM;GAPDH;DLST;PPIF;AMPD3;THEM5;GPI;NDUFV1;HK2;RHOQ;NDUFA10;PRPS1;ENSSSCG00000001064
GO:0006163	purine nucleotide metabolic process	http://amigo.geneontology.org/amigo/term/GO:0006163	144	48	11.6786	4.11009	0	0	396823;396950;397602;397690;399539;407608;492822;494561;574054;692156;733601;733605;733678;100037979;100037988;100037990;100038002;100048954;100134963;100152612;100153818;100154130;100154573;100154777;100154817;100155687;100156967;100157582;100157880;100170131;100188980;100286778;100294678;100516042;100516402;100517744;100521423;100521478;100522515;100522783;100523840;100524308;100524676;10052487…	ENO3;ATP5MC2;SDHC;PGAM2;PDHA1;COX7C;NDUFB9;UQCR10;SUCLG1;ATP5PO;ATP5MC1;COX5B;ATP5F1A;ATP5IF1;MPC2;ACAT1;COX5A;NUDT7;TPI1;PDK4;UQCRQ;NDUFS1;ENSSSCG00000034019;PDHB;ENSSSCG00000007524;AK1;CYCS;C7H6orf125;PGK1;PFKM;ENSSSCG00000003903;ATP5PB;NDUFB6;ATP5ME;SDHD;TEFM;GAPDH;DLST;PPIF;AMPD3;THEM5;GPI;NDUFV1;HK2;RHOQ;NDUFA10;PRPS1;ENSSSCG00000001064
GO:0019693	ribose phosphate metabolic process	http://amigo.geneontology.org/amigo/term/GO:0019693	143	47	11.5975	4.05261	0	0	396823;396950;397602;397690;399539;407608;492822;494561;574054;692156;733601;733605;733678;100037979;100037988;100037990;100038002;100048954;100134963;100152612;100153818;100154130;100154777;100154817;100155687;100156967;100157582;100157880;100170131;100188980;100286778;100294678;100516042;100516402;100517744;100521423;100521478;100522515;100522783;100523840;100524308;100524676;100524873;10062091…	ENO3;ATP5MC2;SDHC;PGAM2;PDHA1;COX7C;NDUFB9;UQCR10;SUCLG1;ATP5PO;ATP5MC1;COX5B;ATP5F1A;ATP5IF1;MPC2;ACAT1;COX5A;NUDT7;TPI1;PDK4;UQCRQ;NDUFS1;ENSSSCG00000034019;PDHB;ENSSSCG00000007524;AK1;CYCS;C7H6orf125;PGK1;PFKM;ENSSSCG00000003903;ATP5PB;NDUFB6;ATP5ME;SDHD;TEFM;GAPDH;DLST;PPIF;AMPD3;THEM5;GPI;NDUFV1;HK2;RHOQ;NDUFA10;PRPS1
GO:0009259	ribonucleotide metabolic process	http://amigo.geneontology.org/amigo/term/GO:0009259	138	46	11.192	4.11009	0	0	396823;396950;397602;397690;399539;407608;492822;494561;574054;692156;733601;733605;733678;100037979;100037988;100037990;100038002;100048954;100134963;100152612;100153818;100154130;100154777;100154817;100155687;100156967;100157582;100157880;100170131;100188980;100286778;100294678;100516042;100516402;100521423;100521478;100522515;100522783;100523840;100524308;100524676;100524873;100620914;10062226…	ENO3;ATP5MC2;SDHC;PGAM2;PDHA1;COX7C;NDUFB9;UQCR10;SUCLG1;ATP5PO;ATP5MC1;COX5B;ATP5F1A;ATP5IF1;MPC2;ACAT1;COX5A;NUDT7;TPI1;PDK4;UQCRQ;NDUFS1;ENSSSCG00000034019;PDHB;ENSSSCG00000007524;AK1;CYCS;C7H6orf125;PGK1;PFKM;ENSSSCG00000003903;ATP5PB;NDUFB6;ATP5ME;SDHD;TEFM;GAPDH;DLST;PPIF;AMPD3;THEM5;GPI;NDUFV1;HK2;RHOQ;NDUFA10
GO:0009150	purine ribonucleotide metabolic process	http://amigo.geneontology.org/amigo/term/GO:0009150	135	46	10.9487	4.20143	0	0	396823;396950;397602;397690;399539;407608;492822;494561;574054;692156;733601;733605;733678;100037979;100037988;100037990;100038002;100048954;100134963;100152612;100153818;100154130;100154777;100154817;100155687;100156967;100157582;100157880;100170131;100188980;100286778;100294678;100516042;100516402;100521423;100521478;100522515;100522783;100523840;100524308;100524676;100524873;100620914;10062226…	ENO3;ATP5MC2;SDHC;PGAM2;PDHA1;COX7C;NDUFB9;UQCR10;SUCLG1;ATP5PO;ATP5MC1;COX5B;ATP5F1A;ATP5IF1;MPC2;ACAT1;COX5A;NUDT7;TPI1;PDK4;UQCRQ;NDUFS1;ENSSSCG00000034019;PDHB;ENSSSCG00000007524;AK1;CYCS;C7H6orf125;PGK1;PFKM;ENSSSCG00000003903;ATP5PB;NDUFB6;ATP5ME;SDHD;TEFM;GAPDH;DLST;PPIF;AMPD3;THEM5;GPI;NDUFV1;HK2;RHOQ;NDUFA10
GO:0006091	generation of precursor metabolites and energy	http://amigo.geneontology.org/amigo/term/GO:0006091	124	48	10.0565	4.77301	0	0	396614;396823;396832;396894;396999;397040;397104;397129;397519;397602;397690;399539;407608;414412;492822;494561;692156;733601;733605;733641;733659;100037990;100048954;100152612;100153818;100154130;100155687;100156967;100157582;100157880;100170131;100188980;100515785;100516042;100516402;100516480;100518016;100521478;100522515;100522783;100524239;100524308;100524676;100524873;100525083;100525869;10…	ENO3;PYGM;ETFDH;SDHC;ACADM;SDHB;PGAM2;COX7C;FH;NDUFB9;UQCR10;SUCLG1;NDUFB3;IDH3B;ENSSSCG00000013436;COX5B;ACO2;ATP5F1A;ENSSSCG00000032129;ACAT1;COX5A;TPI1;CS;UQCRQ;NDUFS1;PDHB;UGP2;CYCS;C7H6orf125;PGK1;PFKM;DLD;ENSSSCG00000003903;CYC1;NDUFB6;SDHD;TEFM;GAPDH;ENSSSCG00000000905;MDH1;DLST;PPIF;GPI;NDUFV1;HK2;LEP;NDUFA10;ETFB
GO:0009199	ribonucleoside triphosphate metabolic process	http://amigo.geneontology.org/amigo/term/GO:0009199	96	37	7.78571	4.75229	0	0	396823;396950;397602;407608;492822;494561;574054;692156;733601;733605;733678;100037979;100037988;100037990;100038002;100048954;100134963;100152612;100153818;100154130;100154817;100155687;100156967;100157582;100157880;100170131;100188980;100516402;100521423;100521478;100522515;100522783;100523840;100524308;100524676;100524873;100620914	ENO3;ATP5MC2;SDHC;PGAM2;COX7C;NDUFB9;UQCR10;ATP5PO;ATP5MC1;COX5B;ATP5F1A;ATP5IF1;COX5A;TPI1;UQCRQ;NDUFS1;ENSSSCG00000034019;ENSSSCG00000007524;AK1;CYCS;C7H6orf125;PGK1;PFKM;ENSSSCG00000003903;ATP5PB;NDUFB6;ATP5ME;SDHD;TEFM;GAPDH;PPIF;AMPD3;GPI;NDUFV1;HK2;RHOQ;NDUFA10
GO:0009144	purine nucleoside triphosphate metabolic process	http://amigo.geneontology.org/amigo/term/GO:0009144	95	37	7.70461	4.80232	0	0	396823;396950;397602;407608;492822;494561;574054;692156;733601;733605;733678;100037979;100037988;100037990;100038002;100048954;100134963;100152612;100153818;100154130;100154817;100155687;100156967;100157582;100157880;100170131;100188980;100516402;100521423;100521478;100522515;100522783;100523840;100524308;100524676;100524873;100620914	ENO3;ATP5MC2;SDHC;PGAM2;COX7C;NDUFB9;UQCR10;ATP5PO;ATP5MC1;COX5B;ATP5F1A;ATP5IF1;COX5A;TPI1;UQCRQ;NDUFS1;ENSSSCG00000034019;ENSSSCG00000007524;AK1;CYCS;C7H6orf125;PGK1;PFKM;ENSSSCG00000003903;ATP5PB;NDUFB6;ATP5ME;SDHD;TEFM;GAPDH;PPIF;AMPD3;GPI;NDUFV1;HK2;RHOQ;NDUFA10
GO:0009161	ribonucleoside monophosphate metabolic process	http://amigo.geneontology.org/amigo/term/GO:0009161	94	37	7.62351	4.85341	0	0	396823;396950;397602;407608;492822;494561;574054;692156;733601;733605;733678;100037979;100037988;100037990;100038002;100048954;100134963;100152612;100153818;100154130;100154817;100155687;100156967;100157582;100157880;100170131;100188980;100516402;100517744;100521423;100521478;100522515;100522783;100524308;100524676;100524873;100620914	ENO3;ATP5MC2;SDHC;PGAM2;COX7C;NDUFB9;UQCR10;ATP5PO;ATP5MC1;COX5B;ATP5F1A;ATP5IF1;COX5A;TPI1;UQCRQ;NDUFS1;ENSSSCG00000034019;ENSSSCG00000007524;AK1;CYCS;C7H6orf125;PGK1;PFKM;ENSSSCG00000003903;ATP5PB;NDUFB6;ATP5ME;SDHD;TEFM;GAPDH;PPIF;AMPD3;GPI;NDUFV1;HK2;NDUFA10;PRPS1
GO:0009205	purine ribonucleoside triphosphate metabolic process	http://amigo.geneontology.org/amigo/term/GO:0009205	93	37	7.54241	4.90559	0	0	396823;396950;397602;407608;492822;494561;574054;692156;733601;733605;733678;100037979;100037988;100037990;100038002;100048954;100134963;100152612;100153818;100154130;100154817;100155687;100156967;100157582;100157880;100170131;100188980;100516402;100521423;100521478;100522515;100522783;100523840;100524308;100524676;100524873;100620914	ENO3;ATP5MC2;SDHC;PGAM2;COX7C;NDUFB9;UQCR10;ATP5PO;ATP5MC1;COX5B;ATP5F1A;ATP5IF1;COX5A;TPI1;UQCRQ;NDUFS1;ENSSSCG00000034019;ENSSSCG00000007524;AK1;CYCS;C7H6orf125;PGK1;PFKM;ENSSSCG00000003903;ATP5PB;NDUFB6;ATP5ME;SDHD;TEFM;GAPDH;PPIF;AMPD3;GPI;NDUFV1;HK2;RHOQ;NDUFA10
GO:0009126	purine nucleoside monophosphate metabolic process	http://amigo.geneontology.org/amigo/term/GO:0009126	92	36	7.46131	4.82489	0	0	396823;396950;397602;407608;492822;494561;574054;692156;733601;733605;733678;100037979;100037988;100037990;100038002;100048954;100134963;100152612;100153818;100154130;100154817;100155687;100156967;100157582;100157880;100170131;100188980;100516402;100521423;100521478;100522515;100522783;100524308;100524676;100524873;100620914	ENO3;ATP5MC2;SDHC;PGAM2;COX7C;NDUFB9;UQCR10;ATP5PO;ATP5MC1;COX5B;ATP5F1A;ATP5IF1;COX5A;TPI1;UQCRQ;NDUFS1;ENSSSCG00000034019;ENSSSCG00000007524;AK1;CYCS;C7H6orf125;PGK1;PFKM;ENSSSCG00000003903;ATP5PB;NDUFB6;ATP5ME;SDHD;TEFM;GAPDH;PPIF;AMPD3;GPI;NDUFV1;HK2;NDUFA10
GO:0009167	purine ribonucleoside monophosphate metabolic process	http://amigo.geneontology.org/amigo/term/GO:0009167	92	36	7.46131	4.82489	0	0	396823;396950;397602;407608;492822;494561;574054;692156;733601;733605;733678;100037979;100037988;100037990;100038002;100048954;100134963;100152612;100153818;100154130;100154817;100155687;100156967;100157582;100157880;100170131;100188980;100516402;100521423;100521478;100522515;100522783;100524308;100524676;100524873;100620914	ENO3;ATP5MC2;SDHC;PGAM2;COX7C;NDUFB9;UQCR10;ATP5PO;ATP5MC1;COX5B;ATP5F1A;ATP5IF1;COX5A;TPI1;UQCRQ;NDUFS1;ENSSSCG00000034019;ENSSSCG00000007524;AK1;CYCS;C7H6orf125;PGK1;PFKM;ENSSSCG00000003903;ATP5PB;NDUFB6;ATP5ME;SDHD;TEFM;GAPDH;PPIF;AMPD3;GPI;NDUFV1;HK2;NDUFA10
GO:0046034	ATP metabolic process	http://amigo.geneontology.org/amigo/term/GO:0046034	82	36	6.6503	5.41329	0	0	396823;396950;397602;407608;492822;494561;574054;692156;733601;733605;733678;100037979;100037988;100037990;100038002;100048954;100134963;100152612;100153818;100154130;100154817;100155687;100156967;100157582;100157880;100170131;100188980;100516402;100521423;100521478;100522515;100522783;100524308;100524676;100524873;100620914	ENO3;ATP5MC2;SDHC;PGAM2;COX7C;NDUFB9;UQCR10;ATP5PO;ATP5MC1;COX5B;ATP5F1A;ATP5IF1;COX5A;TPI1;UQCRQ;NDUFS1;ENSSSCG00000034019;ENSSSCG00000007524;AK1;CYCS;C7H6orf125;PGK1;PFKM;ENSSSCG00000003903;ATP5PB;NDUFB6;ATP5ME;SDHD;TEFM;GAPDH;PPIF;AMPD3;GPI;NDUFV1;HK2;NDUFA10
GO:0009141	nucleoside triphosphate metabolic process	http://amigo.geneontology.org/amigo/term/GO:0009141	103	38	8.35342	4.54903	1.11022e-16	3.52015e-14	396823;396950;397602;399539;407608;492822;494561;574054;692156;733601;733605;733678;100037979;100037988;100037990;100038002;100048954;100134963;100152612;100153818;100154130;100154817;100155687;100156967;100157582;100157880;100170131;100188980;100516402;100521423;100521478;100522515;100522783;100523840;100524308;100524676;100524873;100620914	ENO3;ATP5MC2;SDHC;PGAM2;COX7C;NDUFB9;UQCR10;SUCLG1;ATP5PO;ATP5MC1;COX5B;ATP5F1A;ATP5IF1;COX5A;TPI1;UQCRQ;NDUFS1;ENSSSCG00000034019;ENSSSCG00000007524;AK1;CYCS;C7H6orf125;PGK1;PFKM;ENSSSCG00000003903;ATP5PB;NDUFB6;ATP5ME;SDHD;TEFM;GAPDH;PPIF;AMPD3;GPI;NDUFV1;HK2;RHOQ;NDUFA10
GO:0009123	nucleoside monophosphate metabolic process	http://amigo.geneontology.org/amigo/term/GO:0009123	98	37	7.94792	4.65531	1.11022e-16	3.52015e-14	396823;396950;397602;407608;492822;494561;574054;692156;733601;733605;733678;100037979;100037988;100037990;100038002;100048954;100134963;100152612;100153818;100154130;100154817;100155687;100156967;100157582;100157880;100170131;100188980;100516402;100517744;100521423;100521478;100522515;100522783;100524308;100524676;100524873;100620914	ENO3;ATP5MC2;SDHC;PGAM2;COX7C;NDUFB9;UQCR10;ATP5PO;ATP5MC1;COX5B;ATP5F1A;ATP5IF1;COX5A;TPI1;UQCRQ;NDUFS1;ENSSSCG00000034019;ENSSSCG00000007524;AK1;CYCS;C7H6orf125;PGK1;PFKM;ENSSSCG00000003903;ATP5PB;NDUFB6;ATP5ME;SDHD;TEFM;GAPDH;PPIF;AMPD3;GPI;NDUFV1;HK2;NDUFA10;PRPS1
GO:0009117	nucleotide metabolic process	http://amigo.geneontology.org/amigo/term/GO:0009117	177	50	14.3549	3.48313	3.33067e-16	9.90041e-14	396823;396894;396950;397602;397690;399539;407608;492822;494561;574054;595123;692156;733601;733605;733678;100037979;100037988;100037990;100038002;100048954;100134963;100152612;100153818;100154130;100154573;100154777;100154817;100155687;100156967;100157582;100157880;100170131;100188980;100286778;100294678;100516042;100516402;100517744;100521423;100521478;100522515;100522783;100523840;100524308;1005…	ENO3;ATP5MC2;SDHC;PGAM2;PDHA1;COX7C;NDUFB9;UQCR10;SUCLG1;ATP5PO;ATP5MC1;COX5B;ATP5F1A;ATP5IF1;MPC2;ACAT1;COX5A;NUDT7;TPI1;PDK4;UQCRQ;NDUFS1;ENSSSCG00000034019;PDHB;ENSSSCG00000007524;AK1;CYCS;C7H6orf125;PGK1;PFKM;ENSSSCG00000003903;ATP5PB;NDUFB6;ATP5ME;SDHD;TEFM;GAPDH;MDH1;DLST;PPIF;AMPD3;THEM5;GPI;NDUFV1;HK2;RHOQ;NDUFA10;NAMPT;PRPS1;ENSSSCG00000001064
GO:0006753	nucleoside phosphate metabolic process	http://amigo.geneontology.org/amigo/term/GO:0006753	179	50	14.5171	3.44421	4.44089e-16	1.2424e-13	396823;396894;396950;397602;397690;399539;407608;492822;494561;574054;595123;692156;733601;733605;733678;100037979;100037988;100037990;100038002;100048954;100134963;100152612;100153818;100154130;100154573;100154777;100154817;100155687;100156967;100157582;100157880;100170131;100188980;100286778;100294678;100516042;100516402;100517744;100521423;100521478;100522515;100522783;100523840;100524308;1005…	ENO3;ATP5MC2;SDHC;PGAM2;PDHA1;COX7C;NDUFB9;UQCR10;SUCLG1;ATP5PO;ATP5MC1;COX5B;ATP5F1A;ATP5IF1;MPC2;ACAT1;COX5A;NUDT7;TPI1;PDK4;UQCRQ;NDUFS1;ENSSSCG00000034019;PDHB;ENSSSCG00000007524;AK1;CYCS;C7H6orf125;PGK1;PFKM;ENSSSCG00000003903;ATP5PB;NDUFB6;ATP5ME;SDHD;TEFM;GAPDH;MDH1;DLST;PPIF;AMPD3;THEM5;GPI;NDUFV1;HK2;RHOQ;NDUFA10;NAMPT;PRPS1;ENSSSCG00000001064
GO:0055086	nucleobase-containing small molecule metabolic process	http://amigo.geneontology.org/amigo/term/GO:0055086	199	52	16.1391	3.22198	2.77556e-15	7.33364e-13	396823;396894;396950;397040;397602;397690;399539;407608;492822;494561;574054;595123;692156;733601;733605;733678;100037979;100037988;100037990;100038002;100048954;100134963;100152612;100153818;100154130;100154573;100154777;100154817;100155687;100156967;100157582;100157880;100170131;100188980;100286778;100294678;100516042;100516092;100516402;100517744;100521423;100521478;100522515;100522783;1005238…	ENO3;ATP5MC2;SDHC;PGAM2;PDHA1;COX7C;NDUFB9;UQCR10;SUCLG1;ATP5PO;ATP5MC1;COX5B;ATP5F1A;ATP5IF1;MPC2;ACAT1;COX5A;NUDT7;TPI1;PDK4;UQCRQ;NDUFS1;ENSSSCG00000034019;PDHB;ENSSSCG00000007524;AK1;UGP2;CYCS;C7H6orf125;PGK1;PFKM;ENSSSCG00000003903;ATP5PB;NDUFB6;ATP5ME;SDHD;TEFM;GAPDH;GNPDA2;MDH1;DLST;PPIF;AMPD3;THEM5;GPI;NDUFV1;HK2;RHOQ;NDUFA10;NAMPT;PRPS1;ENSSSCG00000001064
GO:0009060	aerobic respiration	http://amigo.geneontology.org/amigo/term/GO:0009060	22	17	1.78423	9.52794	3.55271e-15	8.893e-13	396894;396999;397519;397690;399539;414412;492822;733641;100037990;100048954;100155687;100156967;100170131;100516042;100524676;100524873;100627128	SDHC;SDHB;COX7C;FH;UQCR10;SUCLG1;IDH3B;COX5B;ACO2;COX5A;CS;PDHB;CYCS;ENSSSCG00000003903;SDHD;MDH1;DLST
GO:0017144	drug metabolic process	http://amigo.geneontology.org/amigo/term/GO:0017144	201	51	16.3013	3.12858	1.9873e-14	4.7258e-12	396593;396816;396823;396894;396950;396999;397519;397602;397690;399539;407608;414412;492822;494561;574054;692156;733601;733605;733641;733678;100037979;100037988;100037990;100038002;100048954;100134963;100152612;100153818;100154130;100154143;100154817;100155687;100156967;100157582;100157880;100170131;100188980;100516042;100516092;100516402;100521367;100521423;100521478;100522515;100522783;100524308…	ENO3;ATP5MC2;SDHC;SDHB;PGAM2;COX7C;FH;NDUFB9;UQCR10;SUCLG1;IDH3B;ATP5PO;ATP5MC1;COX5B;ACO2;ATP5F1A;ATP5IF1;ACAT1;COX5A;TPI1;CS;UQCRQ;NDUFS1;ENSSSCG00000034019;PDHB;ENSSSCG00000007524;AK1;CYCS;C7H6orf125;PGK1;PFKM;ENSSSCG00000003903;ATP5PB;NDUFB6;AKR1B1;ATP5ME;SDHD;SPR;TEFM;GAPDH;GNPDA2;MDH1;PRDX3;DLST;PPIF;AMPD3;GPI;NDUFV1;HK2;NDUFA10;PLA2G7
GO:0015980	energy derivation by oxidation of organic compounds	http://amigo.geneontology.org/amigo/term/GO:0015980	68	28	5.51488	5.07717	4.69624e-14	1.06359e-11	396832;396894;396999;397040;397104;397519;397690;399539;414412;492822;733605;733641;733659;100037990;100048954;100154130;100155687;100156967;100170131;100515785;100516042;100516402;100521478;100522783;100524308;100524676;100524873;100627128	PYGM;ETFDH;SDHC;ACADM;SDHB;COX7C;FH;NDUFB9;UQCR10;SUCLG1;IDH3B;COX5B;ACO2;COX5A;CS;UQCRQ;NDUFS1;PDHB;UGP2;CYCS;ENSSSCG00000003903;NDUFB6;SDHD;MDH1;DLST;NDUFV1;LEP;NDUFA10
GO:0045333	cellular respiration	http://amigo.geneontology.org/amigo/term/GO:0045333	50	24	4.05506	5.91853	5.05151e-14	1.09205e-11	396894;396999;397519;397690;399539;414412;492822;733605;733641;100037990;100048954;100154130;100155687;100156967;100170131;100515785;100516042;100516402;100521478;100522783;100524308;100524676;100524873;100627128	ETFDH;SDHC;SDHB;COX7C;FH;NDUFB9;UQCR10;SUCLG1;IDH3B;COX5B;ACO2;COX5A;CS;UQCRQ;NDUFS1;PDHB;CYCS;ENSSSCG00000003903;NDUFB6;SDHD;MDH1;DLST;NDUFV1;NDUFA10
GO:0055114	oxidation-reduction process	http://amigo.geneontology.org/amigo/term/GO:0055114	314	63	25.4658	2.47391	1.60627e-12	3.32149e-10	396593;396614;396816;396823;396832;396894;396931;396999;397012;397040;397104;397129;397519;397604;397690;399539;414412;492822;733601;733605;733641;733659;733694;100037990;100037991;100048954;100154130;100154143;100154573;100154810;100155687;100155731;100155854;100156930;100156967;100157880;100170131;100286778;100294678;100515785;100516042;100516402;100516480;100518016;100519412;100520636;10052136…	PYGM;ETFDH;SDHC;ACADM;NDUFA9;SDHB;NDUFV2;PDHA1;COX7C;FH;NDUFB9;ECSIT;UQCR10;SUCLG1;NDUFB3;ENSSSCG00000002449;IDH3B;HADHA;ACADVL;ENSSSCG00000013436;COX5B;ACO2;ATP5F1A;HIF1AN;NDUFB4;ENSSSCG00000032129;ACAT1;COX5A;PDK4;CS;UQCRQ;NDUFS1;PDHB;UGP2;CYCS;ENSSSCG00000002351;ACADL;CYP4F8;PFKM;DLD;ENSSSCG00000003903;CYC1;NDUFB6;AKR1B1;ENSSSCG00000024144;SDHD;SPR;GAPDH;HADH;ENSSSCG00000000905;MDH1;PRDX3;DLST…
GO:0022900	electron transport chain	http://amigo.geneontology.org/amigo/term/GO:0022900	59	24	4.78497	5.01571	4.55502e-12	9.02654e-10	396614;397129;414412;492822;733605;100037990;100048954;100154130;100155687;100156967;100157880;100170131;100515785;100516402;100516480;100518016;100521478;100522783;100524239;100524308;100524676;100524873;100525083;100525869	ETFDH;SDHC;SDHB;COX7C;NDUFB9;UQCR10;NDUFB3;ENSSSCG00000013436;COX5B;ATP5F1A;ENSSSCG00000032129;COX5A;UQCRQ;NDUFS1;CYCS;DLD;ENSSSCG00000003903;CYC1;NDUFB6;SDHD;ENSSSCG00000000905;NDUFV1;NDUFA10;ETFB
GO:0006099	tricarboxylic acid cycle	http://amigo.geneontology.org/amigo/term/GO:0006099	12	11	0.973214	11.3028	9.50817e-12	1.80883e-09	396894;396999;397519;397690;399539;414412;733641;100048954;100516042;100524676;100627128	SDHC;SDHB;FH;SUCLG1;IDH3B;ACO2;CS;PDHB;SDHD;MDH1;DLST
GO:0044281	small molecule metabolic process	http://amigo.geneontology.org/amigo/term/GO:0044281	499	83	40.4695	2.05093	1.16731e-11	2.13528e-09	396614;396799;396816;396823;396894;396931;396950;396967;396968;396999;397012;397040;397104;397149;397504;397519;397602;397604;397690;399539;407608;414412;414426;448982;492822;494561;574054;595123;692156;733601;733605;733641;733678;100037269;100037979;100037988;100037990;100038002;100048954;100134963;100152612;100153444;100153818;100154130;100154573;100154777;100154817;100155687;100155731;10015693…	ENO3;ATP5MC2;GOT2;ETFDH;SDHC;ACADM;NDUFA9;SDHB;PGAM2;PDHA1;COX7C;FH;NDUFB9;UQCR10;SUCLG1;IDH3B;HADHA;ACADVL;ATP5PO;ATP5MC1;COX5B;ACO2;ATP5F1A;ATP5IF1;MPC2;ACSL1;ACAT1;COX5A;NUDT7;TPI1;PRKAA2;PDK4;CS;UQCRQ;NDUFS1;ENSSSCG00000034019;PDHB;ENSSSCG00000007524;AK1;PRKAG3;UGP2;CYCS;ENSSSCG00000002351;ACADL;C7H6orf125;PGK1;PFKM;COQ5;ENSSSCG00000003903;ATP5PB;NDUFB6;QRSL1;AKR1B1;ATP5ME;SDHD;SPR;TEFM;GOT1;…
GO:0019637	organophosphate metabolic process	http://amigo.geneontology.org/amigo/term/GO:0019637	289	57	23.4382	2.43192	4.7319e-11	8.33516e-09	396593;396823;396894;396950;397119;397602;397690;399539;407608;492822;494561;574054;595123;692156;733601;733605;733678;100037269;100037979;100037988;100037990;100038002;100048954;100134963;100147706;100152612;100153818;100154130;100154573;100154777;100154817;100155687;100156967;100157582;100157880;100170131;100188980;100286778;100294678;100316852;100516042;100516402;100517744;100521423;100521478;…	ENO3;ATP5MC2;SDHC;PGAM2;PDHA1;COX7C;NDUFB9;UQCR10;SUCLG1;FITM1;ATP5PO;ATP5MC1;PLCD4;COX5B;ATP5F1A;ATP5IF1;MPC2;ACAT1;COX5A;NUDT7;TPI1;PDK4;UQCRQ;NDUFS1;ENSSSCG00000034019;PDHB;ENSSSCG00000007524;AK1;CYCS;C7H6orf125;PGK1;PFKM;ENSSSCG00000003903;ATP5PB;NDUFB6;ATP5ME;SDHD;TEFM;SH3GLB1;GAPDH;MDH1;GDE1;DLST;PPIF;AMPD3;THEM5;GPI;NDUFV1;HK2;RHOQ;NDUFA10;PLA2G7;SLC27A1;NAMPT;PRPS1;ENSSSCG00000001064;PIGF
GO:0006101	citrate metabolic process	http://amigo.geneontology.org/amigo/term/GO:0006101	13	11	1.05432	10.4333	5.73526e-11	9.74174e-09	396894;396999;397519;397690;399539;414412;733641;100048954;100516042;100524676;100627128	SDHC;SDHB;FH;SUCLG1;IDH3B;ACO2;CS;PDHB;SDHD;MDH1;DLST
GO:0046390	ribose phosphate biosynthetic process	http://amigo.geneontology.org/amigo/term/GO:0046390	75	25	6.08259	4.11009	2.7036e-10	4.4339e-08	396823;396950;397602;407608;492822;494561;574054;692156;733601;733678;100037979;100037988;100134963;100154777;100154817;100157582;100157880;100188980;100286778;100294678;100516042;100517744;100521423;100620914;100626793	ENO3;ATP5MC2;PGAM2;PDHA1;ATP5PO;ATP5MC1;COX5B;ATP5F1A;MPC2;ACAT1;TPI1;PDK4;ENSSSCG00000034019;PDHB;ENSSSCG00000007524;AK1;PGK1;PFKM;ATP5PB;ATP5ME;GAPDH;AMPD3;GPI;HK2;PRPS1
GO:0009152	purine ribonucleotide biosynthetic process	http://amigo.geneontology.org/amigo/term/GO:0009152	70	24	5.67708	4.22752	3.21486e-10	5.09663e-08	396823;396950;397602;407608;492822;494561;574054;692156;733601;733678;100037979;100037988;100134963;100154777;100154817;100157582;100157880;100188980;100286778;100294678;100516042;100521423;100620914;100626793	ENO3;ATP5MC2;PGAM2;PDHA1;ATP5PO;ATP5MC1;COX5B;ATP5F1A;MPC2;ACAT1;TPI1;PDK4;ENSSSCG00000034019;PDHB;ENSSSCG00000007524;AK1;PGK1;PFKM;ATP5PB;ATP5ME;GAPDH;AMPD3;GPI;HK2
GO:0030239	myofibril assembly	http://amigo.geneontology.org/amigo/term/GO:0030239	24	14	1.94643	7.19266	3.78913e-10	5.81326e-08	396579;396690;397349;414906;497233;733663;100152267;100153985;100154254;100157406;100271745;100522496;100525195;100624901	MYPN;TCAP;MYOZ2;LMOD2;TNNT3;ENSSSCG00000010190;TNNT1;ACTN2;CAPN3;MYOM1;MYL2;SIX4;CFL2;ACTC1
GO:0009156	ribonucleoside monophosphate biosynthetic process	http://amigo.geneontology.org/amigo/term/GO:0009156	50	20	4.05506	4.93211	4.26847e-10	6.34401e-08	396823;396950;397602;407608;492822;494561;574054;692156;733601;733678;100037979;100037988;100134963;100154817;100157582;100157880;100188980;100517744;100521423;100620914	ENO3;ATP5MC2;PGAM2;ATP5PO;ATP5MC1;COX5B;ATP5F1A;TPI1;ENSSSCG00000034019;ENSSSCG00000007524;AK1;PGK1;PFKM;ATP5PB;ATP5ME;GAPDH;AMPD3;GPI;HK2;PRPS1
GO:0006164	purine nucleotide biosynthetic process	http://amigo.geneontology.org/amigo/term/GO:0006164	77	25	6.24479	4.00334	5.12828e-10	7.39094e-08	396823;396950;397602;407608;492822;494561;574054;692156;733601;733678;100037979;100037988;100134963;100154777;100154817;100157582;100157880;100188980;100286778;100294678;100516042;100517744;100521423;100620914;100626793	ENO3;ATP5MC2;PGAM2;PDHA1;ATP5PO;ATP5MC1;COX5B;ATP5F1A;MPC2;ACAT1;TPI1;PDK4;ENSSSCG00000034019;PDHB;ENSSSCG00000007524;AK1;PGK1;PFKM;ATP5PB;ATP5ME;GAPDH;AMPD3;GPI;HK2;PRPS1
GO:0006754	ATP biosynthetic process	http://amigo.geneontology.org/amigo/term/GO:0006754	37	17	3.00074	5.66526	6.73609e-10	9.42261e-08	396823;396950;397602;407608;492822;494561;574054;692156;733601;733678;100037979;100037988;100134963;100154817;100157582;100157880;100188980	ENO3;ATP5MC2;PGAM2;ATP5PO;ATP5MC1;COX5B;ATP5F1A;TPI1;ENSSSCG00000034019;ENSSSCG00000007524;PGK1;PFKM;ATP5PB;ATP5ME;GAPDH;GPI;HK2
GO:0055001	muscle cell development	http://amigo.geneontology.org/amigo/term/GO:0055001	42	18	3.40625	5.2844	8.53839e-10	1.0824e-07	396579;396690;396875;397005;397349;407604;414906;497233;733663;100152267;100153985;100154254;100157406;100271745;100511902;100522496;100525195;100624901	MYOD1;MYPN;TCAP;MYOZ2;MYF6;LMOD2;TNNT3;ENSSSCG00000010190;TNNT1;ACTN2;CAPN3;MYOM1;MYL2;ATP2A2;SIX4;CFL2;RCAN1;ACTC1
GO:0045214	sarcomere organization	http://amigo.geneontology.org/amigo/term/GO:0045214	15	11	1.21652	9.0422	8.6438e-10	1.0824e-07	396579;397349;414906;497233;733663;100153985;100157406;100271745;100522496;100525195;100624901	MYPN;TCAP;MYOZ2;LMOD2;TNNT3;TNNT1;ACTN2;CAPN3;MYOM1;SIX4;CFL2
GO:0072350	tricarboxylic acid metabolic process	http://amigo.geneontology.org/amigo/term/GO:0072350	15	11	1.21652	9.0422	8.6438e-10	1.0824e-07	396894;396999;397519;397690;399539;414412;733641;100048954;100516042;100524676;100627128	SDHC;SDHB;FH;SUCLG1;IDH3B;ACO2;CS;PDHB;SDHD;MDH1;DLST
GO:0009260	ribonucleotide biosynthetic process	http://amigo.geneontology.org/amigo/term/GO:0009260	73	24	5.92039	4.05379	8.64829e-10	1.0824e-07	396823;396950;397602;407608;492822;494561;574054;692156;733601;733678;100037979;100037988;100134963;100154777;100154817;100157582;100157880;100188980;100286778;100294678;100516042;100521423;100620914;100626793	ENO3;ATP5MC2;PGAM2;PDHA1;ATP5PO;ATP5MC1;COX5B;ATP5F1A;MPC2;ACAT1;TPI1;PDK4;ENSSSCG00000034019;PDHB;ENSSSCG00000007524;AK1;PGK1;PFKM;ATP5PB;ATP5ME;GAPDH;AMPD3;GPI;HK2
GO:0072522	purine-containing compound biosynthetic process	http://amigo.geneontology.org/amigo/term/GO:0072522	79	25	6.40699	3.90199	9.491e-10	1.15742e-07	396823;396950;397602;407608;492822;494561;574054;692156;733601;733678;100037979;100037988;100134963;100154777;100154817;100157582;100157880;100188980;100286778;100294678;100516042;100517744;100521423;100620914;100626793	ENO3;ATP5MC2;PGAM2;PDHA1;ATP5PO;ATP5MC1;COX5B;ATP5F1A;MPC2;ACAT1;TPI1;PDK4;ENSSSCG00000034019;PDHB;ENSSSCG00000007524;AK1;PGK1;PFKM;ATP5PB;ATP5ME;GAPDH;AMPD3;GPI;HK2;PRPS1
GO:0009124	nucleoside monophosphate biosynthetic process	http://amigo.geneontology.org/amigo/term/GO:0009124	52	20	4.21726	4.74241	9.8069e-10	1.16604e-07	396823;396950;397602;407608;492822;494561;574054;692156;733601;733678;100037979;100037988;100134963;100154817;100157582;100157880;100188980;100517744;100521423;100620914	ENO3;ATP5MC2;PGAM2;ATP5PO;ATP5MC1;COX5B;ATP5F1A;TPI1;ENSSSCG00000034019;ENSSSCG00000007524;AK1;PGK1;PFKM;ATP5PB;ATP5ME;GAPDH;AMPD3;GPI;HK2;PRPS1
GO:0006119	oxidative phosphorylation	http://amigo.geneontology.org/amigo/term/GO:0006119	38	17	3.08185	5.51618	1.13008e-09	1.31089e-07	492822;733605;100037990;100048954;100152612;100153818;100154130;100155687;100156967;100170131;100516402;100521478;100522515;100522783;100524308;100524676;100524873	SDHC;COX7C;NDUFB9;UQCR10;COX5B;COX5A;UQCRQ;NDUFS1;CYCS;C7H6orf125;ENSSSCG00000003903;NDUFB6;SDHD;TEFM;PPIF;NDUFV1;NDUFA10
GO:0009127	purine nucleoside monophosphate biosynthetic process	http://amigo.geneontology.org/amigo/term/GO:0009127	48	19	3.89286	4.88073	1.4685e-09	1.62423e-07	396823;396950;397602;407608;492822;494561;574054;692156;733601;733678;100037979;100037988;100134963;100154817;100157582;100157880;100188980;100521423;100620914	ENO3;ATP5MC2;PGAM2;ATP5PO;ATP5MC1;COX5B;ATP5F1A;TPI1;ENSSSCG00000034019;ENSSSCG00000007524;AK1;PGK1;PFKM;ATP5PB;ATP5ME;GAPDH;AMPD3;GPI;HK2
GO:0009168	purine ribonucleoside monophosphate biosynthetic process	http://amigo.geneontology.org/amigo/term/GO:0009168	48	19	3.89286	4.88073	1.4685e-09	1.62423e-07	396823;396950;397602;407608;492822;494561;574054;692156;733601;733678;100037979;100037988;100134963;100154817;100157582;100157880;100188980;100521423;100620914	ENO3;ATP5MC2;PGAM2;ATP5PO;ATP5MC1;COX5B;ATP5F1A;TPI1;ENSSSCG00000034019;ENSSSCG00000007524;AK1;PGK1;PFKM;ATP5PB;ATP5ME;GAPDH;AMPD3;GPI;HK2
GO:0055002	striated muscle cell development	http://amigo.geneontology.org/amigo/term/GO:0055002	39	17	3.16295	5.37474	1.85733e-09	2.00761e-07	396579;396690;397005;397349;407604;414906;497233;733663;100152267;100153985;100154254;100157406;100271745;100511902;100522496;100525195;100624901	MYOD1;MYPN;TCAP;MYOZ2;MYF6;LMOD2;TNNT3;ENSSSCG00000010190;TNNT1;ACTN2;CAPN3;MYOM1;MYL2;SIX4;CFL2;RCAN1;ACTC1
GO:1901293	nucleoside phosphate biosynthetic process	http://amigo.geneontology.org/amigo/term/GO:1901293	95	27	7.70461	3.50439	2.89118e-09	3.05566e-07	396823;396950;397602;399539;407608;492822;494561;574054;595123;692156;733601;733678;100037979;100037988;100134963;100154777;100154817;100157582;100157880;100188980;100286778;100294678;100516042;100517744;100521423;100620914;100626793	ENO3;ATP5MC2;PGAM2;PDHA1;SUCLG1;ATP5PO;ATP5MC1;COX5B;ATP5F1A;MPC2;ACAT1;TPI1;PDK4;ENSSSCG00000034019;PDHB;ENSSSCG00000007524;AK1;PGK1;PFKM;ATP5PB;ATP5ME;GAPDH;AMPD3;GPI;HK2;NAMPT;PRPS1
GO:1901135	carbohydrate derivative metabolic process	http://amigo.geneontology.org/amigo/term/GO:1901135	295	54	23.9249	2.25707	3.05925e-09	3.163e-07	396799;396816;396823;396950;397040;397401;397524;397602;397690;399539;407608;492822;494561;574054;692156;733601;733605;733678;100037979;100037988;100037990;100038002;100048954;100134963;100152612;100153818;100154130;100154777;100154817;100155687;100156967;100157582;100157880;100170131;100188980;100286778;100294678;100516042;100516092;100516402;100517744;100521423;100521478;100522515;100522783;100…	ENO3;ATP5MC2;SDHC;PGAM2;PDHA1;COX7C;NDUFB9;UQCR10;SUCLG1;ATP5PO;ATP5MC1;COX5B;ATP5F1A;ATP5IF1;MPC2;ACAT1;COX5A;NUDT7;TPI1;PDK4;UQCRQ;NDUFS1;ENSSSCG00000034019;PDHB;VCP;ENSSSCG00000007524;AK1;UGP2;CYCS;C7H6orf125;PGK1;PFKM;ENSSSCG00000003903;ATP5PB;NDUFB6;RAMP1;AKR1B1;ATP5ME;SDHD;TEFM;GAPDH;GNPDA2;DLST;PPIF;AMPD3;THEM5;ITIH4;GPI;NDUFV1;HK2;RHOQ;NDUFA10;PRPS1;PIGF
GO:0009142	nucleoside triphosphate biosynthetic process	http://amigo.geneontology.org/amigo/term/GO:0009142	50	19	4.05506	4.6855	3.3248e-09	3.36442e-07	396823;396950;397602;399539;407608;492822;494561;574054;692156;733601;733678;100037979;100037988;100134963;100154817;100157582;100157880;100188980;100521423	ENO3;ATP5MC2;PGAM2;SUCLG1;ATP5PO;ATP5MC1;COX5B;ATP5F1A;TPI1;ENSSSCG00000034019;ENSSSCG00000007524;AK1;PGK1;PFKM;ATP5PB;ATP5ME;GAPDH;GPI;HK2
GO:0022904	respiratory electron transport chain	http://amigo.geneontology.org/amigo/term/GO:0022904	37	16	3.00074	5.33201	6.53727e-09	6.47735e-07	414412;492822;733605;100037990;100048954;100154130;100155687;100156967;100170131;100515785;100516402;100521478;100522783;100524308;100524676;100524873	ETFDH;SDHC;SDHB;COX7C;NDUFB9;UQCR10;COX5B;COX5A;UQCRQ;NDUFS1;CYCS;ENSSSCG00000003903;NDUFB6;SDHD;NDUFV1;NDUFA10
GO:0009206	purine ribonucleoside triphosphate biosynthetic process	http://amigo.geneontology.org/amigo/term/GO:0009206	42	17	3.40625	4.99083	7.38807e-09	7.17095e-07	396823;396950;397602;407608;492822;494561;574054;692156;733601;733678;100037979;100037988;100134963;100154817;100157582;100157880;100188980	ENO3;ATP5MC2;PGAM2;ATP5PO;ATP5MC1;COX5B;ATP5F1A;TPI1;ENSSSCG00000034019;ENSSSCG00000007524;PGK1;PFKM;ATP5PB;ATP5ME;GAPDH;GPI;HK2
GO:0007005	mitochondrion organization	http://amigo.geneontology.org/amigo/term/GO:0007005	126	31	10.2188	3.03364	8.85306e-09	8.42103e-07	396564;397011;654300;100037978;100037982;100038002;100152325;100152612;100153818;100154130;100154143;100154394;100155687;100316852;100513895;100514033;100514655;100516402;100516708;100517196;100521478;100522775;100524622;100525083;100622616;100624252;100624335;100624738;100626014;100626843;100627352	FUNDC2;SLC25A4;NDUFA9;UQCC1;NDUFB9;UQCR10;NDUFB3;ENSSSCG00000040571;NDUFB11;ATP5IF1;NDUFB4;FAM162A;NDUFS1;NDUFB2;TOMM7;C7H6orf125;NDUFA11;FMC1;POLDIP2;ENSSSCG00000010073;ENSSSCG00000024144;OPTN;SH3GLB1;NDUFS5;PRDX3;MICOS13;OMA1;PPIF;CAMK2A;ROMO1;NDUFA10
GO:0009165	nucleotide biosynthetic process	http://amigo.geneontology.org/amigo/term/GO:0009165	94	26	7.62351	3.4105	1.08563e-08	1.0124e-06	396823;396950;397602;407608;492822;494561;574054;595123;692156;733601;733678;100037979;100037988;100134963;100154777;100154817;100157582;100157880;100188980;100286778;100294678;100516042;100517744;100521423;100620914;100626793	ENO3;ATP5MC2;PGAM2;PDHA1;ATP5PO;ATP5MC1;COX5B;ATP5F1A;MPC2;ACAT1;TPI1;PDK4;ENSSSCG00000034019;PDHB;ENSSSCG00000007524;AK1;PGK1;PFKM;ATP5PB;ATP5ME;GAPDH;AMPD3;GPI;HK2;NAMPT;PRPS1
GO:0009145	purine nucleoside triphosphate biosynthetic process	http://amigo.geneontology.org/amigo/term/GO:0009145	43	17	3.48735	4.87476	1.13285e-08	1.03612e-06	396823;396950;397602;407608;492822;494561;574054;692156;733601;733678;100037979;100037988;100134963;100154817;100157582;100157880;100188980	ENO3;ATP5MC2;PGAM2;ATP5PO;ATP5MC1;COX5B;ATP5F1A;TPI1;ENSSSCG00000034019;ENSSSCG00000007524;PGK1;PFKM;ATP5PB;ATP5ME;GAPDH;GPI;HK2
GO:0061061	muscle structure development	http://amigo.geneontology.org/amigo/term/GO:0061061	135	32	10.9487	2.92273	1.34351e-08	1.20561e-06	396579;396690;396875;396959;397005;397104;397349;397689;407604;407608;414906;474162;493185;497233;733590;733663;100152267;100153106;100153818;100153985;100154254;100155854;100156847;100157406;100271745;100511902;100518125;100522496;100525195;100624588;100624901;100625631	MYOD1;MYPN;TCAP;MYOZ2;MYF6;XIRP2;LMOD2;NMRK2;TNNT3;MYLPF;ENSSSCG00000010190;TNNT1;ACTN2;ANKRD1;CAPN3;MYOM1;ACADM;MYL2;ATP2A2;YBX3;SIX1;SIX4;HIF1AN;C7H6orf125;PGK1;BVES;DYRK1B;CFL2;RCAN1;ACTC1;IFRD1;MEF2C
GO:0051186	cofactor metabolic process	http://amigo.geneontology.org/amigo/term/GO:0051186	129	31	10.4621	2.96309	1.62231e-08	1.42883e-06	396816;396823;396894;396967;396968;397602;397690;399539;407608;494561;595123;692156;733601;100038002;100153444;100154143;100154777;100155731;100156145;100157055;100157582;100188980;100286778;100294678;100516042;100521183;100521367;100524622;100622268;100626793;100738827	ENO3;GOT2;NDUFA9;PGAM2;PDHA1;SUCLG1;ATP5IF1;MPC2;ACAT1;NUDT7;TPI1;PDK4;PDHB;HSPA9;PGK1;PFKM;COQ5;NFS1;AKR1B1;SPR;GOT1;GAPDH;MDH1;PRDX3;DLST;THEM5;UROS;COQ6;GPI;HK2;NAMPT
GO:0009201	ribonucleoside triphosphate biosynthetic process	http://amigo.geneontology.org/amigo/term/GO:0009201	45	17	3.64955	4.6581	2.55045e-08	2.20544e-06	396823;396950;397602;407608;492822;494561;574054;692156;733601;733678;100037979;100037988;100134963;100154817;100157582;100157880;100188980	ENO3;ATP5MC2;PGAM2;ATP5PO;ATP5MC1;COX5B;ATP5F1A;TPI1;ENSSSCG00000034019;ENSSSCG00000007524;PGK1;PFKM;ATP5PB;ATP5ME;GAPDH;GPI;HK2
GO:0051146	striated muscle cell differentiation	http://amigo.geneontology.org/amigo/term/GO:0051146	67	21	5.43378	3.86471	2.6782e-08	2.27456e-06	396579;396690;397005;397104;397349;407604;407608;414906;497233;733590;733663;100152267;100153985;100154254;100157406;100271745;100511902;100522496;100525195;100624901;100625631	MYOD1;MYPN;TCAP;MYOZ2;MYF6;LMOD2;TNNT3;ENSSSCG00000010190;TNNT1;ACTN2;CAPN3;MYOM1;ACADM;MYL2;SIX4;PGK1;DYRK1B;CFL2;RCAN1;ACTC1;MEF2C
GO:0010927	cellular component assembly involved in morphogenesis	http://amigo.geneontology.org/amigo/term/GO:0010927	31	14	2.51414	5.56851	3.02346e-08	2.43722e-06	396579;396690;397349;414906;497233;733663;100152267;100153985;100154254;100157406;100271745;100522496;100525195;100624901	MYPN;TCAP;MYOZ2;LMOD2;TNNT3;ENSSSCG00000010190;TNNT1;ACTN2;CAPN3;MYOM1;MYL2;SIX4;CFL2;ACTC1
GO:0033108	mitochondrial respiratory chain complex assembly	http://amigo.geneontology.org/amigo/term/GO:0033108	31	14	2.51414	5.56851	3.02346e-08	2.43722e-06	654300;100153818;100154130;100155687;100513895;100514033;100514655;100521478;100522775;100524622;100525083;100622616;100624335;100624738	NDUFA9;UQCC1;NDUFB9;UQCR10;NDUFB3;ENSSSCG00000040571;NDUFB11;NDUFB4;NDUFB2;C7H6orf125;NDUFA11;ENSSSCG00000024144;NDUFS5;NDUFA10
GO:0042773	ATP synthesis coupled electron transport	http://amigo.geneontology.org/amigo/term/GO:0042773	31	14	2.51414	5.56851	3.02346e-08	2.43722e-06	492822;733605;100037990;100048954;100154130;100155687;100156967;100170131;100516402;100521478;100522783;100524308;100524676;100524873	SDHC;COX7C;NDUFB9;UQCR10;COX5B;COX5A;UQCRQ;NDUFS1;CYCS;ENSSSCG00000003903;NDUFB6;SDHD;NDUFV1;NDUFA10
GO:0009108	coenzyme biosynthetic process	http://amigo.geneontology.org/amigo/term/GO:0009108	51	18	4.13616	4.35186	3.40767e-08	2.70114e-06	396823;397602;407608;494561;595123;692156;733601;100154777;100155731;100157055;100157582;100188980;100286778;100294678;100516042;100521367;100524622;100626793	ENO3;NDUFA9;PGAM2;PDHA1;MPC2;ACAT1;TPI1;PDK4;PDHB;PGK1;PFKM;COQ5;SPR;GAPDH;COQ6;GPI;HK2;NAMPT
GO:0042775	mitochondrial ATP synthesis coupled electron transport	http://amigo.geneontology.org/amigo/term/GO:0042775	27	13	2.18973	5.9368	3.67939e-08	2.86872e-06	492822;733605;100037990;100048954;100154130;100155687;100156967;100170131;100521478;100522783;100524308;100524676;100524873	SDHC;COX7C;NDUFB9;UQCR10;COX5B;COX5A;UQCRQ;CYCS;ENSSSCG00000003903;NDUFB6;SDHD;NDUFV1;NDUFA10
GO:0042692	muscle cell differentiation	http://amigo.geneontology.org/amigo/term/GO:0042692	87	24	7.0558	3.40146	4.33374e-08	3.3244e-06	396579;396690;396875;397005;397104;397349;407604;407608;414906;493185;497233;733590;733663;100152267;100153985;100154254;100156847;100157406;100271745;100511902;100522496;100525195;100624901;100625631	MYOD1;MYPN;TCAP;MYOZ2;MYF6;LMOD2;TNNT3;ENSSSCG00000010190;TNNT1;ACTN2;CAPN3;MYOM1;ACADM;MYL2;ATP2A2;SIX1;SIX4;PGK1;DYRK1B;CFL2;RCAN1;ACTC1;IFRD1;MEF2C
GO:0051188	cofactor biosynthetic process	http://amigo.geneontology.org/amigo/term/GO:0051188	64	20	5.19048	3.85321	6.1524e-08	4.64457e-06	396823;397602;407608;494561;595123;692156;733601;100038002;100153444;100154777;100155731;100157055;100157582;100188980;100286778;100294678;100516042;100521367;100524622;100626793	ENO3;NDUFA9;PGAM2;PDHA1;ATP5IF1;MPC2;ACAT1;TPI1;PDK4;PDHB;PGK1;PFKM;COQ5;SPR;GAPDH;UROS;COQ6;GPI;HK2;NAMPT
GO:0006732	coenzyme metabolic process	http://amigo.geneontology.org/amigo/term/GO:0006732	83	23	6.7314	3.41682	7.64593e-08	5.68188e-06	396823;396894;397602;397690;399539;407608;494561;595123;692156;733601;100154777;100155731;100157055;100157582;100188980;100286778;100294678;100516042;100521367;100524622;100622268;100626793;100738827	ENO3;NDUFA9;PGAM2;PDHA1;SUCLG1;MPC2;ACAT1;NUDT7;TPI1;PDK4;PDHB;PGK1;PFKM;COQ5;SPR;GAPDH;MDH1;DLST;THEM5;COQ6;GPI;HK2;NAMPT
GO:0060537	muscle tissue development	http://amigo.geneontology.org/amigo/term/GO:0060537	85	23	6.8936	3.33643	1.24046e-07	8.98444e-06	396690;396959;397005;397104;397689;407604;474162;493185;497233;733590;733663;100048933;100152267;100153106;100153818;100153985;100154254;100156847;100157406;100271745;100511902;100518125;100522496	MYOD1;TCAP;MYOZ2;MYF6;XIRP2;MYLPF;ENSSSCG00000010190;ACTN2;ANKRD1;MYOM1;ACADM;MYL2;YBX3;SIX1;SIX4;C7H6orf125;BVES;CFL2;RCAN1;ZFAND5;ACTC1;IFRD1;MEF2C
GO:0031032	actomyosin structure organization	http://amigo.geneontology.org/amigo/term/GO:0031032	44	16	3.56845	4.48374	1.24679e-07	8.98444e-06	396579;396690;397046;397349;414906;497233;733663;100152267;100153985;100154254;100157406;100271745;100522496;100525195;100621523;100624901	MYPN;TCAP;MYOZ2;LMOD2;TNNT3;ENSSSCG00000010190;TNNT1;ACTN2;CAPN3;MYOM1;MYL2;SIX4;CFL2;ACTC1;MYOC;PFN2
GO:0014706	striated muscle tissue development	http://amigo.geneontology.org/amigo/term/GO:0014706	79	22	6.40699	3.43375	1.34682e-07	9.56041e-06	396690;396959;397005;397104;397689;407604;474162;493185;497233;733590;733663;100152267;100153106;100153818;100153985;100154254;100156847;100157406;100271745;100511902;100518125;100522496	MYOD1;TCAP;MYOZ2;MYF6;XIRP2;MYLPF;ENSSSCG00000010190;ACTN2;ANKRD1;MYOM1;ACADM;MYL2;YBX3;SIX1;SIX4;C7H6orf125;BVES;CFL2;RCAN1;ACTC1;IFRD1;MEF2C
GO:0019752	carboxylic acid metabolic process	http://amigo.geneontology.org/amigo/term/GO:0019752	238	43	19.3021	2.22774	2.27816e-07	1.55688e-05	396614;396799;396823;396894;396931;396967;396968;396999;397012;397104;397149;397504;397519;397602;397604;397690;399539;407608;414412;414426;448982;494561;692156;733601;733641;100037269;100048954;100153444;100154777;100156930;100157582;100188980;100286778;100294678;100513955;100515785;100516042;100516092;100520636;100524676;100626793;100627128;100627457	ENO3;GOT2;ETFDH;SDHC;ACADM;SDHB;PGAM2;PDHA1;FH;SUCLG1;IDH3B;HADHA;ACADVL;ACO2;MPC2;ACSL1;ACAT1;TPI1;PRKAA2;PDK4;CS;PDHB;PRKAG3;ENSSSCG00000002351;ACADL;PGK1;PFKM;QRSL1;SDHD;GOT1;GAPDH;HADH;GNPDA2;MDH1;DLST;PRKAG1;ITIH4;ENSSSCG00000016041;UROS;GPI;HK2;SLC27A1;ETFB
GO:0015985	energy coupled proton transport, down electrochemical gradient	http://amigo.geneontology.org/amigo/term/GO:0015985	11	8	0.892113	8.96747	2.29146e-07	1.55688e-05	396950;492822;574054;733678;100037988;100134963;100154817;100157880	ATP5MC2;ATP5PO;ATP5MC1;COX5B;ATP5F1A;ENSSSCG00000007524;ATP5PB;ATP5ME
GO:0015986	ATP synthesis coupled proton transport	http://amigo.geneontology.org/amigo/term/GO:0015986	11	8	0.892113	8.96747	2.29146e-07	1.55688e-05	396950;492822;574054;733678;100037988;100134963;100154817;100157880	ATP5MC2;ATP5PO;ATP5MC1;COX5B;ATP5F1A;ENSSSCG00000007524;ATP5PB;ATP5ME
GO:0007517	muscle organ development	http://amigo.geneontology.org/amigo/term/GO:0007517	65	19	5.27158	3.60423	4.32656e-07	2.89818e-05	396690;396959;397005;397689;407604;474162;497233;733590;733663;100152267;100153106;100153818;100153985;100154254;100156847;100271745;100511902;100518125;100522496	MYOD1;TCAP;MYOZ2;MYF6;XIRP2;MYLPF;ENSSSCG00000010190;ANKRD1;MYOM1;MYL2;YBX3;SIX1;SIX4;C7H6orf125;BVES;CFL2;RCAN1;ACTC1;MEF2C
GO:0007519	skeletal muscle tissue development	http://amigo.geneontology.org/amigo/term/GO:0007519	37	14	3.00074	4.66551	4.43304e-07	2.92827e-05	396959;397005;407604;474162;497233;733590;733663;100153106;100153818;100153985;100154254;100156847;100511902;100518125	MYOD1;MYOZ2;MYF6;MYLPF;ENSSSCG00000010190;ANKRD1;YBX3;SIX1;SIX4;C7H6orf125;BVES;CFL2;RCAN1;MEF2C
GO:0043436	oxoacid metabolic process	http://amigo.geneontology.org/amigo/term/GO:0043436	244	43	19.7887	2.17296	4.7127e-07	3.07035e-05	396614;396799;396823;396894;396931;396967;396968;396999;397012;397104;397149;397504;397519;397602;397604;397690;399539;407608;414412;414426;448982;494561;692156;733601;733641;100037269;100048954;100153444;100154777;100156930;100157582;100188980;100286778;100294678;100513955;100515785;100516042;100516092;100520636;100524676;100626793;100627128;100627457	ENO3;GOT2;ETFDH;SDHC;ACADM;SDHB;PGAM2;PDHA1;FH;SUCLG1;IDH3B;HADHA;ACADVL;ACO2;MPC2;ACSL1;ACAT1;TPI1;PRKAA2;PDK4;CS;PDHB;PRKAG3;ENSSSCG00000002351;ACADL;PGK1;PFKM;QRSL1;SDHD;GOT1;GAPDH;HADH;GNPDA2;MDH1;DLST;PRKAG1;ITIH4;ENSSSCG00000016041;UROS;GPI;HK2;SLC27A1;ETFB
GO:0010257	NADH dehydrogenase complex assembly	http://amigo.geneontology.org/amigo/term/GO:0010257	19	10	1.54092	6.48962	5.13173e-07	3.2542e-05	100154130;100513895;100514033;100514655;100521478;100522775;100524622;100525083;100624335;100624738	NDUFA9;NDUFB9;NDUFB3;NDUFB11;NDUFB4;NDUFB2;NDUFA11;ENSSSCG00000024144;NDUFS5;NDUFA10
GO:0032981	mitochondrial respiratory chain complex I assembly	http://amigo.geneontology.org/amigo/term/GO:0032981	19	10	1.54092	6.48962	5.13173e-07	3.2542e-05	100154130;100513895;100514033;100514655;100521478;100522775;100524622;100525083;100624335;100624738	NDUFA9;NDUFB9;NDUFB3;NDUFB11;NDUFB4;NDUFB2;NDUFA11;ENSSSCG00000024144;NDUFS5;NDUFA10
GO:0090407	organophosphate biosynthetic process	http://amigo.geneontology.org/amigo/term/GO:0090407	149	31	12.0841	2.56536	5.51746e-07	3.45277e-05	396823;396950;397602;399539;407608;492822;494561;574054;595123;692156;733601;733678;100037269;100037979;100037988;100134963;100147706;100154777;100154817;100157582;100157880;100188980;100286778;100294678;100316852;100516042;100517744;100521423;100524018;100620914;100626793	ENO3;ATP5MC2;PGAM2;PDHA1;SUCLG1;FITM1;ATP5PO;ATP5MC1;COX5B;ATP5F1A;MPC2;ACAT1;TPI1;PDK4;ENSSSCG00000034019;PDHB;ENSSSCG00000007524;AK1;PGK1;PFKM;ATP5PB;ATP5ME;SH3GLB1;GAPDH;AMPD3;GPI;HK2;SLC27A1;NAMPT;PRPS1;PIGF
GO:0060538	skeletal muscle organ development	http://amigo.geneontology.org/amigo/term/GO:0060538	38	14	3.08185	4.54273	6.51052e-07	4.0213e-05	396959;397005;407604;474162;497233;733590;733663;100153106;100153818;100153985;100154254;100156847;100511902;100518125	MYOD1;MYOZ2;MYF6;MYLPF;ENSSSCG00000010190;ANKRD1;YBX3;SIX1;SIX4;C7H6orf125;BVES;CFL2;RCAN1;MEF2C
GO:0006082	organic acid metabolic process	http://amigo.geneontology.org/amigo/term/GO:0006082	249	43	20.1942	2.12932	8.42826e-07	5.13908e-05	396614;396799;396823;396894;396931;396967;396968;396999;397012;397104;397149;397504;397519;397602;397604;397690;399539;407608;414412;414426;448982;494561;692156;733601;733641;100037269;100048954;100153444;100154777;100156930;100157582;100188980;100286778;100294678;100513955;100515785;100516042;100516092;100520636;100524676;100626793;100627128;100627457	ENO3;GOT2;ETFDH;SDHC;ACADM;SDHB;PGAM2;PDHA1;FH;SUCLG1;IDH3B;HADHA;ACADVL;ACO2;MPC2;ACSL1;ACAT1;TPI1;PRKAA2;PDK4;CS;PDHB;PRKAG3;ENSSSCG00000002351;ACADL;PGK1;PFKM;QRSL1;SDHD;GOT1;GAPDH;HADH;GNPDA2;MDH1;DLST;PRKAG1;ITIH4;ENSSSCG00000016041;UROS;GPI;HK2;SLC27A1;ETFB
GO:0006733	oxidoreduction coenzyme metabolic process	http://amigo.geneontology.org/amigo/term/GO:0006733	41	14	3.32515	4.21034	1.89371e-06	0.000114006	396823;396894;397602;407608;494561;595123;692156;733601;100154777;100155731;100157055;100157582;100188980;100524622	ENO3;NDUFA9;PGAM2;MPC2;TPI1;PGK1;PFKM;COQ5;GAPDH;MDH1;COQ6;GPI;HK2;NAMPT
GO:0006090	pyruvate metabolic process	http://amigo.geneontology.org/amigo/term/GO:0006090	31	12	2.51414	4.77301	2.28207e-06	0.000135669	396823;397602;407608;494561;692156;733601;100154777;100157582;100188980;100286778;100294678;100516042	ENO3;PGAM2;PDHA1;MPC2;TPI1;PDK4;PDHB;PGK1;PFKM;GAPDH;GPI;HK2
GO:0016999	antibiotic metabolic process	http://amigo.geneontology.org/amigo/term/GO:0016999	42	14	3.40625	4.11009	2.63497e-06	0.000154715	396816;396894;396999;397519;397690;399539;414412;733641;100048954;100154143;100516042;100516092;100524676;100627128	SDHC;SDHB;FH;SUCLG1;IDH3B;ACO2;CS;PDHB;AKR1B1;SDHD;GNPDA2;MDH1;PRDX3;DLST
GO:0033539	fatty acid beta-oxidation using acyl-CoA dehydrogenase	http://amigo.geneontology.org/amigo/term/GO:0033539	5	5	0.405506	12.3303	3.41092e-06	0.000197833	396614;396931;397104;100515785;100520636	ETFDH;ACADM;ACADVL;ACADL;ETFB
GO:0032787	monocarboxylic acid metabolic process	http://amigo.geneontology.org/amigo/term/GO:0032787	131	27	10.6243	2.54135	3.74026e-06	0.000214321	396614;396823;396931;397012;397104;397149;397504;397602;397604;407608;414426;448982;494561;692156;733601;100037269;100154777;100156930;100157582;100188980;100286778;100294678;100513955;100515785;100516042;100520636;100626793	ENO3;ETFDH;ACADM;PGAM2;PDHA1;HADHA;ACADVL;MPC2;ACSL1;ACAT1;TPI1;PRKAA2;PDK4;PDHB;PRKAG3;ENSSSCG00000002351;ACADL;PGK1;PFKM;GAPDH;HADH;PRKAG1;ENSSSCG00000016041;GPI;HK2;SLC27A1;ETFB
GO:0006637	acyl-CoA metabolic process	http://amigo.geneontology.org/amigo/term/GO:0006637	19	9	1.54092	5.84066	6.06488e-06	0.000339348	397690;399539;100154777;100286778;100294678;100516042;100622268;100626793;100738827	PDHA1;SUCLG1;MPC2;ACAT1;NUDT7;PDK4;PDHB;DLST;THEM5
GO:0035383	thioester metabolic process	http://amigo.geneontology.org/amigo/term/GO:0035383	19	9	1.54092	5.84066	6.06488e-06	0.000339348	397690;399539;100154777;100286778;100294678;100516042;100622268;100626793;100738827	PDHA1;SUCLG1;MPC2;ACAT1;NUDT7;PDK4;PDHB;DLST;THEM5
GO:0009132	nucleoside diphosphate metabolic process	http://amigo.geneontology.org/amigo/term/GO:0009132	34	12	2.75744	4.35186	7.08858e-06	0.000392015	396823;397602;399539;407608;494561;692156;733601;100157582;100188980;100521423;100620914;100738827	ENO3;PGAM2;SUCLG1;NUDT7;TPI1;AK1;PGK1;PFKM;GAPDH;AMPD3;GPI;HK2
GO:0030036	actin cytoskeleton organization	http://amigo.geneontology.org/amigo/term/GO:0030036	147	28	11.9219	2.34862	1.22214e-05	0.000668105	396579;396690;396839;396986;397046;397349;397689;414421;414906;497233;733663;100037999;100151861;100152267;100153985;100154254;100156549;100157406;100158213;100271745;100520177;100522496;100523750;100523840;100525195;100621523;100624901;106504190	MYPN;TCAP;MYOZ2;XIRP2;LMOD2;TNNT3;TMOD4;FHL3;ENSSSCG00000010190;TNNT1;ACTN2;CAPN3;MYOM1;SMTNL2;MYL2;SIX4;PDLIM3;AMOT;CSF3;CFL2;TRIP10;TWF2;TPM1;BCL6;ACTC1;MYOC;RHOQ;PFN2
GO:0046031	ADP metabolic process	http://amigo.geneontology.org/amigo/term/GO:0046031	26	10	2.10863	4.74241	1.75877e-05	0.000950537	396823;397602;407608;494561;692156;733601;100157582;100188980;100521423;100620914	ENO3;PGAM2;TPI1;AK1;PGK1;PFKM;GAPDH;AMPD3;GPI;HK2
GO:0003009	skeletal muscle contraction	http://amigo.geneontology.org/amigo/term/GO:0003009	6	5	0.486607	10.2752	1.91018e-05	0.00102077	396579;397293;414906;100156435;100271745	TCAP;TNNT3;TNNT1;TNNC1;KCNJ2
GO:0009135	purine nucleoside diphosphate metabolic process	http://amigo.geneontology.org/amigo/term/GO:0009135	27	10	2.18973	4.56677	2.59473e-05	0.00134136	396823;397602;407608;494561;692156;733601;100157582;100188980;100521423;100620914	ENO3;PGAM2;TPI1;AK1;PGK1;PFKM;GAPDH;AMPD3;GPI;HK2
GO:0009179	purine ribonucleoside diphosphate metabolic process	http://amigo.geneontology.org/amigo/term/GO:0009179	27	10	2.18973	4.56677	2.59473e-05	0.00134136	396823;397602;407608;494561;692156;733601;100157582;100188980;100521423;100620914	ENO3;PGAM2;TPI1;AK1;PGK1;PFKM;GAPDH;AMPD3;GPI;HK2
GO:0009185	ribonucleoside diphosphate metabolic process	http://amigo.geneontology.org/amigo/term/GO:0009185	27	10	2.18973	4.56677	2.59473e-05	0.00134136	396823;397602;407608;494561;692156;733601;100157582;100188980;100521423;100620914	ENO3;PGAM2;TPI1;AK1;PGK1;PFKM;GAPDH;AMPD3;GPI;HK2
GO:0006839	mitochondrial transport	http://amigo.geneontology.org/amigo/term/GO:0006839	44	13	3.56845	3.64304	2.6639e-05	0.00136231	397116;492822;100037982;100038002;100152612;100153794;100154394;100154777;100155980;100156324;100316852;100626014;100737924	COX5B;ATP5IF1;MPC2;SMDT1;MICU1;TOMM7;SH3GLB1;MCU;MRPL18;PPIF;UCP3;CAMK2A;ROMO1
GO:0034220	ion transmembrane transport	http://amigo.geneontology.org/amigo/term/GO:0034220	231	37	18.7344	1.97498	3.11975e-05	0.00157846	396828;396875;396950;397010;397116;397293;397349;397651;397659;492822;574054;733644;733678;100037298;100037988;100037990;100134963;100152612;100153669;100153794;100154777;100154817;100154923;100154966;100155980;100156967;100157406;100157880;100512393;100514316;100516480;100519779;100525465;100525644;100626641;100628074;100737924	HRC;ACTN2;CAPN3;ATP5MC2;COX7C;ATP2A2;ATP5PO;ATP5MC1;COX5B;ATP5F1A;CACNG6;MPC2;ENSSSCG00000032129;COX5A;CACNB1;SMDT1;MICU1;ENSSSCG00000007524;SLC41A1;VDAC3;VDAC1;ATP5PB;VDAC2;ATP5ME;RANGRF;RHCG;TMEM38B;MCU;SFXN4;ATP1A4;PPIF;UCP3;ORAI1;KCNK7;SLC7A2;KCNJ2;SLC38A2
GO:0030029	actin filament-based process	http://amigo.geneontology.org/amigo/term/GO:0030029	164	29	13.3006	2.18035	3.73655e-05	0.00187063	396579;396690;396839;396986;397046;397293;397349;397689;414421;414906;497233;733663;100037999;100151861;100152267;100153985;100154254;100156549;100157406;100158213;100271745;100520177;100522496;100523750;100523840;100525195;100621523;100624901;106504190	MYPN;TCAP;MYOZ2;XIRP2;LMOD2;TNNT3;TMOD4;FHL3;ENSSSCG00000010190;TNNT1;ACTN2;CAPN3;MYOM1;SMTNL2;MYL2;SIX4;PDLIM3;AMOT;CSF3;CFL2;TRIP10;TWF2;TPM1;BCL6;ACTC1;MYOC;RHOQ;KCNJ2;PFN2
GO:0006996	organelle organization	http://amigo.geneontology.org/amigo/term/GO:0006996	791	93	64.151	1.4497	3.80022e-05	0.00187669	396564;396579;396690;396725;396823;396839;396875;396986;397011;397046;397349;397504;397524;397651;397689;407604;414421;414906;494017;497233;595110;654300;733663;100037290;100037978;100037982;100037999;100038002;100147706;100151861;100151951;100152247;100152267;100152325;100152384;100152494;100152612;100153061;100153818;100153985;100154130;100154143;100154254;100154321;100154394;100155006;10015568…	MYOD1;MYPN;TCAP;MYOZ2;XIRP2;KLHL41;LMOD2;FUNDC2;TNNT3;TMOD4;FHL3;ENSSSCG00000010190;TNNT1;ACTN2;CAPN3;MYOM1;SMTNL2;SLC25A4;NDUFA9;MYL2;UQCC1;MTERF3;H1-8;ATP2A2;NDUFB9;UQCR10;NDUFB3;FITM1;SIX4;PDLIM3;ENSSSCG00000040571;MAVS;NDUFB11;ATP5IF1;NDUFB4;FAM162A;PRKAA2;NDUFS1;AMOT;VCP;NDUFB2;CSF3;TOMM7;DES;C7H6orf125;VDAC3;NEURL1;NDUFA11;FMC1;CFAP298;RILPL1;POLDIP2;INO80C;CFL2;TRIP10;TWF2;ENSSSCG000000100…
GO:0098655	cation transmembrane transport	http://amigo.geneontology.org/amigo/term/GO:0098655	181	31	14.6793	2.11182	3.82755e-05	0.00187669	396828;396875;396950;397116;397293;397349;492822;574054;733644;733678;100037298;100037988;100037990;100134963;100152612;100153669;100153794;100154817;100154923;100155980;100156967;100157406;100157880;100512393;100514316;100516480;100519779;100525465;100626641;100628074;100737924	HRC;ACTN2;CAPN3;ATP5MC2;COX7C;ATP2A2;ATP5PO;ATP5MC1;COX5B;ATP5F1A;CACNG6;ENSSSCG00000032129;COX5A;CACNB1;SMDT1;MICU1;ENSSSCG00000007524;SLC41A1;ATP5PB;ATP5ME;RANGRF;RHCG;TMEM38B;MCU;ATP1A4;PPIF;UCP3;ORAI1;KCNK7;SLC7A2;KCNJ2
GO:0048747	muscle fiber development	http://amigo.geneontology.org/amigo/term/GO:0048747	14	7	1.13542	6.16514	4.51237e-05	0.00214608	396690;397005;407604;100154254;100271745;100511902;100522496	MYOD1;TCAP;MYF6;ENSSSCG00000010190;MYOM1;MYL2;RCAN1
GO:0048641	regulation of skeletal muscle tissue development	http://amigo.geneontology.org/amigo/term/GO:0048641	14	7	1.13542	6.16514	4.51237e-05	0.00214608	397005;407604;733590;100153818;100153985;100156847;100518125	MYOD1;MYF6;YBX3;SIX1;SIX4;C7H6orf125;MEF2C
GO:0006084	acetyl-CoA metabolic process	http://amigo.geneontology.org/amigo/term/GO:0006084	14	7	1.13542	6.16514	4.51237e-05	0.00214608	397690;100154777;100286778;100294678;100516042;100626793;100738827	PDHA1;MPC2;ACAT1;NUDT7;PDK4;PDHB;DLST
GO:0034440	lipid oxidation	http://amigo.geneontology.org/amigo/term/GO:0034440	29	10	2.35193	4.25182	5.31632e-05	0.0024548	396593;396614;396931;397012;397104;397604;100286778;100515785;100520636;100626793	ETFDH;ACADM;HADHA;ACADVL;ACAT1;PDK4;ACADL;HADH;PLA2G7;ETFB
GO:0006165	nucleoside diphosphate phosphorylation	http://amigo.geneontology.org/amigo/term/GO:0006165	29	10	2.35193	4.25182	5.31632e-05	0.0024548	396823;397602;399539;407608;494561;692156;733601;100157582;100188980;100521423	ENO3;PGAM2;SUCLG1;TPI1;AK1;PGK1;PFKM;GAPDH;GPI;HK2
GO:0046939	nucleotide phosphorylation	http://amigo.geneontology.org/amigo/term/GO:0046939	29	10	2.35193	4.25182	5.31632e-05	0.0024548	396823;397602;399539;407608;494561;692156;733601;100157582;100188980;100521423	ENO3;PGAM2;SUCLG1;TPI1;AK1;PGK1;PFKM;GAPDH;GPI;HK2
GO:1990542	mitochondrial transmembrane transport	http://amigo.geneontology.org/amigo/term/GO:1990542	24	9	1.94643	4.62385	5.95188e-05	0.00272184	397116;492822;100037982;100153794;100154394;100154777;100155980;100156324;100737924	COX5B;MPC2;SMDT1;MICU1;TOMM7;MCU;MRPL18;UCP3;ROMO1
GO:0050879	multicellular organismal movement	http://amigo.geneontology.org/amigo/term/GO:0050879	7	5	0.567708	8.80734	6.24096e-05	0.00280019	396579;397293;414906;100156435;100271745	TCAP;TNNT3;TNNT1;TNNC1;KCNJ2
GO:0050881	musculoskeletal movement	http://amigo.geneontology.org/amigo/term/GO:0050881	7	5	0.567708	8.80734	6.24096e-05	0.00280019	396579;397293;414906;100156435;100271745	TCAP;TNNT3;TNNT1;TNNC1;KCNJ2
GO:0006793	phosphorus metabolic process	http://amigo.geneontology.org/amigo/term/GO:0006793	795	92	64.4754	1.4269	8.07797e-05	0.00359054	396593;396823;396832;396839;396894;396950;397040;397046;397119;397149;397157;397205;397264;397408;397437;397493;397504;397564;397601;397602;397652;397690;399539;407608;414426;448982;492822;494561;574054;595110;595123;692156;733590;733601;733602;733605;733630;733678;100037269;100037290;100037979;100037988;100037990;100038002;100048954;100134963;100147706;100152612;100153818;100154130;100154143;100…	CKMT2;HRC;ENO3;CKM;ATP5MC2;SDHC;PGAM2;PDHA1;COX7C;NDUFB9;UQCR10;SUCLG1;FITM1;ATP5PO;ATP5MC1;PLCD4;COX5B;MAVS;ATP5F1A;PPP1R14B;ATP5IF1;MPC2;ACSL1;ACAT1;COX5A;NUDT7;TPI1;PRKAA2;PDK4;UQCRQ;NDUFS1;ENSSSCG00000034019;PDHB;ENSSSCG00000007524;AK1;PRKAG3;UGP2;CYCS;CSF3;C7H6orf125;PGK1;PFKM;RHO;NEURL1;ENSSSCG00000003903;DYRK1B;ATP5PB;NDUFB6;GRB10;HBEGF;PKIA;ATP5ME;SDHD;TEFM;SH3GLB1;GAPDH;AKT1S1;RCAN1;GNPD…
GO:0019359	nicotinamide nucleotide biosynthetic process	http://amigo.geneontology.org/amigo/term/GO:0019359	25	9	2.02753	4.4389	8.64437e-05	0.0037718	396823;397602;407608;494561;595123;692156;733601;100157582;100188980	ENO3;PGAM2;TPI1;PGK1;PFKM;GAPDH;GPI;HK2;NAMPT
GO:0019363	pyridine nucleotide biosynthetic process	http://amigo.geneontology.org/amigo/term/GO:0019363	25	9	2.02753	4.4389	8.64437e-05	0.0037718	396823;397602;407608;494561;595123;692156;733601;100157582;100188980	ENO3;PGAM2;TPI1;PGK1;PFKM;GAPDH;GPI;HK2;NAMPT
GO:0009166	nucleotide catabolic process	http://amigo.geneontology.org/amigo/term/GO:0009166	31	10	2.51414	3.97751	0.000101604	0.00439299	396823;397602;407608;494561;692156;733601;100157582;100188980;100626793;100738827	ENO3;PGAM2;ACAT1;NUDT7;TPI1;PGK1;PFKM;GAPDH;GPI;HK2
GO:0019362	pyridine nucleotide metabolic process	http://amigo.geneontology.org/amigo/term/GO:0019362	37	11	3.00074	3.66576	0.000105476	0.00447894	396823;396894;397602;407608;494561;595123;692156;733601;100154777;100157582;100188980	ENO3;PGAM2;MPC2;TPI1;PGK1;PFKM;GAPDH;MDH1;GPI;HK2;NAMPT
GO:0046496	nicotinamide nucleotide metabolic process	http://amigo.geneontology.org/amigo/term/GO:0046496	37	11	3.00074	3.66576	0.000105476	0.00447894	396823;396894;397602;407608;494561;595123;692156;733601;100154777;100157582;100188980	ENO3;PGAM2;MPC2;TPI1;PGK1;PFKM;GAPDH;MDH1;GPI;HK2;NAMPT
GO:0072525	pyridine-containing compound biosynthetic process	http://amigo.geneontology.org/amigo/term/GO:0072525	26	9	2.10863	4.26817	0.000122897	0.00503877	396823;397602;407608;494561;595123;692156;733601;100157582;100188980	ENO3;PGAM2;TPI1;PGK1;PFKM;GAPDH;GPI;HK2;NAMPT
GO:0033865	nucleoside bisphosphate metabolic process	http://amigo.geneontology.org/amigo/term/GO:0033865	26	9	2.10863	4.26817	0.000122897	0.00503877	397690;399539;100154777;100286778;100294678;100516042;100622268;100626793;100738827	PDHA1;SUCLG1;MPC2;ACAT1;NUDT7;PDK4;PDHB;DLST;THEM5
GO:0033875	ribonucleoside bisphosphate metabolic process	http://amigo.geneontology.org/amigo/term/GO:0033875	26	9	2.10863	4.26817	0.000122897	0.00503877	397690;399539;100154777;100286778;100294678;100516042;100622268;100626793;100738827	PDHA1;SUCLG1;MPC2;ACAT1;NUDT7;PDK4;PDHB;DLST;THEM5
GO:0034032	purine nucleoside bisphosphate metabolic process	http://amigo.geneontology.org/amigo/term/GO:0034032	26	9	2.10863	4.26817	0.000122897	0.00503877	397690;399539;100154777;100286778;100294678;100516042;100622268;100626793;100738827	PDHA1;SUCLG1;MPC2;ACAT1;NUDT7;PDK4;PDHB;DLST;THEM5
GO:1902600	proton transmembrane transport	http://amigo.geneontology.org/amigo/term/GO:1902600	64	15	5.19048	2.88991	0.000127106	0.00516679	396828;396875;396950;397116;492822;574054;733678;100037988;100037990;100134963;100152612;100154817;100156967;100157880;100516480	ATP5MC2;COX7C;ATP2A2;ATP5PO;ATP5MC1;COX5B;ATP5F1A;ENSSSCG00000032129;COX5A;ENSSSCG00000007524;ATP5PB;ATP5ME;ATP1A4;PPIF;UCP3
GO:0060415	muscle tissue morphogenesis	http://amigo.geneontology.org/amigo/term/GO:0060415	16	7	1.29762	5.3945	0.000130363	0.00525428	396690;396959;397005;397689;100152267;100271745;100522496	TCAP;MYF6;XIRP2;ANKRD1;MYOM1;MYL2;ACTC1
GO:0098662	inorganic cation transmembrane transport	http://amigo.geneontology.org/amigo/term/GO:0098662	167	28	13.5439	2.06735	0.000135305	0.00537271	396828;396875;396950;397116;397293;397349;492822;574054;733678;100037988;100037990;100134963;100152612;100153794;100154817;100154923;100155980;100156967;100157406;100157880;100512393;100514316;100516480;100519779;100525465;100626641;100628074;100737924	HRC;ACTN2;CAPN3;ATP5MC2;COX7C;ATP2A2;ATP5PO;ATP5MC1;COX5B;ATP5F1A;CACNG6;ENSSSCG00000032129;COX5A;CACNB1;SMDT1;MICU1;ENSSSCG00000007524;SLC41A1;ATP5PB;ATP5ME;RANGRF;MCU;ATP1A4;PPIF;UCP3;ORAI1;KCNK7;KCNJ2
GO:0006096	glycolytic process	http://amigo.geneontology.org/amigo/term/GO:0006096	21	8	1.70312	4.69725	0.00013669	0.00537271	396823;397602;407608;494561;692156;733601;100157582;100188980	ENO3;PGAM2;TPI1;PGK1;PFKM;GAPDH;GPI;HK2
GO:0006757	ATP generation from ADP	http://amigo.geneontology.org/amigo/term/GO:0006757	21	8	1.70312	4.69725	0.00013669	0.00537271	396823;397602;407608;494561;692156;733601;100157582;100188980	ENO3;PGAM2;TPI1;PGK1;PFKM;GAPDH;GPI;HK2
GO:0072524	pyridine-containing compound metabolic process	http://amigo.geneontology.org/amigo/term/GO:0072524	38	11	3.08185	3.56929	0.000137864	0.00537444	396823;396894;397602;407608;494561;595123;692156;733601;100154777;100157582;100188980	ENO3;PGAM2;MPC2;TPI1;PGK1;PFKM;GAPDH;MDH1;GPI;HK2;NAMPT
GO:0006796	phosphate-containing compound metabolic process	http://amigo.geneontology.org/amigo/term/GO:0006796	785	90	63.6644	1.41366	0.000142978	0.00552847	396593;396823;396832;396839;396894;396950;397046;397119;397149;397157;397205;397264;397408;397437;397493;397504;397564;397601;397602;397652;397690;399539;407608;414426;448982;492822;494561;574054;595110;595123;692156;733590;733601;733602;733605;733630;733678;100037269;100037290;100037979;100037988;100037990;100038002;100048954;100134963;100147706;100152612;100153818;100154130;100154143;100154573;…	CKMT2;HRC;ENO3;CKM;ATP5MC2;SDHC;PGAM2;PDHA1;COX7C;NDUFB9;UQCR10;SUCLG1;FITM1;ATP5PO;ATP5MC1;PLCD4;COX5B;MAVS;ATP5F1A;PPP1R14B;ATP5IF1;MPC2;ACSL1;ACAT1;COX5A;NUDT7;TPI1;PRKAA2;PDK4;UQCRQ;NDUFS1;ENSSSCG00000034019;PDHB;ENSSSCG00000007524;AK1;PRKAG3;CYCS;CSF3;C7H6orf125;PGK1;PFKM;RHO;NEURL1;ENSSSCG00000003903;DYRK1B;ATP5PB;NDUFB6;GRB10;HBEGF;PKIA;ATP5ME;SDHD;TEFM;SH3GLB1;GAPDH;AKT1S1;RCAN1;MDH1;PRKA…
GO:0035384	thioester biosynthetic process	http://amigo.geneontology.org/amigo/term/GO:0035384	8	5	0.64881	7.70642	0.000155377	0.00586487	100154777;100286778;100294678;100516042;100626793	PDHA1;MPC2;ACAT1;PDK4;PDHB
GO:0071616	acyl-CoA biosynthetic process	http://amigo.geneontology.org/amigo/term/GO:0071616	8	5	0.64881	7.70642	0.000155377	0.00586487	100154777;100286778;100294678;100516042;100626793	PDHA1;MPC2;ACAT1;PDK4;PDHB
GO:0006085	acetyl-CoA biosynthetic process	http://amigo.geneontology.org/amigo/term/GO:0006085	8	5	0.64881	7.70642	0.000155377	0.00586487	100154777;100286778;100294678;100516042;100626793	PDHA1;MPC2;ACAT1;PDK4;PDHB
GO:0019395	fatty acid oxidation	http://amigo.geneontology.org/amigo/term/GO:0019395	27	9	2.18973	4.11009	0.000171372	0.00641767	396614;396931;397012;397104;397604;100286778;100515785;100520636;100626793	ETFDH;ACADM;HADHA;ACADVL;ACAT1;PDK4;ACADL;HADH;ETFB
GO:1901137	carbohydrate derivative biosynthetic process	http://amigo.geneontology.org/amigo/term/GO:1901137	178	29	14.436	2.00887	0.000173084	0.00643117	396823;396950;397401;397524;397602;407608;492822;494561;574054;692156;733601;733678;100037979;100037988;100134963;100154777;100154817;100157582;100157880;100188980;100286778;100294678;100516042;100516092;100517744;100521423;100524018;100620914;100626793	ENO3;ATP5MC2;PGAM2;PDHA1;ATP5PO;ATP5MC1;COX5B;ATP5F1A;MPC2;ACAT1;TPI1;PDK4;ENSSSCG00000034019;PDHB;VCP;ENSSSCG00000007524;AK1;PGK1;PFKM;ATP5PB;RAMP1;ATP5ME;GAPDH;GNPDA2;AMPD3;GPI;HK2;PRPS1;PIGF
GO:0055085	transmembrane transport	http://amigo.geneontology.org/amigo/term/GO:0055085	345	47	27.9799	1.67978	0.0001803	0.00664734	396828;396832;396875;396950;397010;397116;397293;397349;397651;397659;492822;574054;733644;733678;100037298;100037982;100037988;100037990;100134963;100152612;100153669;100153794;100154394;100154777;100154817;100154923;100154966;100155980;100156324;100156967;100157391;100157406;100157880;100188977;100512393;100514316;100516480;100517196;100519779;100522495;100523840;100524459;100525465;100525644;1…	HRC;ACTN2;CAPN3;ATP5MC2;SLC25A4;COX7C;ATP2A2;ATP5PO;ATP5MC1;COX5B;ATP5F1A;CACNG6;MPC2;ENSSSCG00000032129;COX5A;CACNB1;SMDT1;MICU1;ENSSSCG00000007524;TOMM7;SLC41A1;VDAC3;VDAC1;TIMM23;ATP5PB;GRB10;VDAC2;ATP5ME;RANGRF;RHCG;TMEM38B;SLC25A34;MCU;MRPL18;SFXN4;ATP1A4;PPIF;UCP3;SLC25A20;ORAI1;KCNK7;SLC7A2;RHOQ;LEP;ROMO1;KCNJ2;SLC38A2
GO:1901661	quinone metabolic process	http://amigo.geneontology.org/amigo/term/GO:1901661	5	4	0.405506	9.86422	0.000199037	0.00714547	396816;100155731;100157055;100524622	NDUFA9;COQ5;AKR1B1;COQ6
GO:0030240	skeletal muscle thin filament assembly	http://amigo.geneontology.org/amigo/term/GO:0030240	5	4	0.405506	9.86422	0.000199037	0.00714547	100152267;100154254;100271745;100522496	TCAP;ENSSSCG00000010190;MYOM1;ACTC1
GO:0006635	fatty acid beta-oxidation	http://amigo.geneontology.org/amigo/term/GO:0006635	22	8	1.78423	4.48374	0.000199821	0.00714547	396614;396931;397012;397104;397604;100515785;100520636;100626793	ETFDH;ACADM;HADHA;ACADVL;ACAT1;ACADL;HADH;ETFB
GO:0042866	pyruvate biosynthetic process	http://amigo.geneontology.org/amigo/term/GO:0042866	22	8	1.78423	4.48374	0.000199821	0.00714547	396823;397602;407608;494561;692156;733601;100157582;100188980	ENO3;PGAM2;TPI1;PGK1;PFKM;GAPDH;GPI;HK2
GO:0035914	skeletal muscle cell differentiation	http://amigo.geneontology.org/amigo/term/GO:0035914	17	7	1.37872	5.07717	0.000206343	0.00732365	396959;397005;407604;733590;100153818;100153985;100156847	MYOD1;MYF6;ANKRD1;SIX1;SIX4;C7H6orf125;MEF2C
GO:0003012	muscle system process	http://amigo.geneontology.org/amigo/term/GO:0003012	74	16	6.00149	2.66601	0.000209938	0.00739604	396579;396690;396875;397046;397293;414906;494020;733663;100037999;100156435;100157406;100188980;100271745;100522496;100525195;100525465	TCAP;MYOZ2;LMOD2;HRC;TNNT3;TNNT1;ACTN2;MYOM1;TNNC1;MYL2;PGAM2;LMCD1;ATP2A2;TPM1;MYOC;KCNJ2
GO:0072330	monocarboxylic acid biosynthetic process	http://amigo.geneontology.org/amigo/term/GO:0072330	60	14	4.86607	2.87706	0.000224376	0.00784657	396823;397149;397504;397602;407608;414426;494561;692156;733601;100157582;100188980;100286778;100513955;100520636	ENO3;PGAM2;ACADVL;TPI1;PRKAA2;PDK4;PRKAG3;PGK1;PFKM;GAPDH;PRKAG1;ENSSSCG00000016041;GPI;HK2
GO:0016052	carbohydrate catabolic process	http://amigo.geneontology.org/amigo/term/GO:0016052	34	10	2.75744	3.62655	0.000240958	0.00828403	396823;397397;397602;407608;494561;692156;733601;733659;100157582;100188980	ENO3;PYGM;ENSSSCG00000036331;PGAM2;TPI1;PGK1;PFKM;GAPDH;GPI;HK2
GO:1901292	nucleoside phosphate catabolic process	http://amigo.geneontology.org/amigo/term/GO:1901292	34	10	2.75744	3.62655	0.000240958	0.00828403	396823;397602;407608;494561;692156;733601;100157582;100188980;100626793;100738827	ENO3;PGAM2;ACAT1;NUDT7;TPI1;PGK1;PFKM;GAPDH;GPI;HK2
GO:0006811	ion transport	http://amigo.geneontology.org/amigo/term/GO:0006811	359	48	29.1153	1.64862	0.000242111	0.00828403	396828;396832;396875;396950;396968;397010;397116;397245;397293;397349;397401;397651;397659;448982;492822;574054;733627;733644;733678;100037269;100037298;100037979;100037988;100037990;100134963;100152612;100153669;100153794;100154777;100154817;100154923;100154966;100155980;100156967;100157406;100157880;100512393;100514316;100516480;100517196;100519779;100525465;100525644;100525865;100626014;100626…	ATP1B4;SLN;HRC;ACTN2;CAPN3;ATP5MC2;SLC25A4;GOT2;COX7C;ATP2A2;ATP5PO;ATP5MC1;COX5B;ATP5F1A;CACNG6;MPC2;ACSL1;ENSSSCG00000032129;COX5A;ENSSSCG00000034019;CACNB1;SMDT1;MICU1;ENSSSCG00000007524;SLC41A1;VDAC3;VDAC1;ATP5PB;RAMP1;VDAC2;ATP5ME;RANGRF;RHCG;TMEM38B;STARD7;MCU;SFXN4;ATP1A4;PPIF;UCP3;ORAI1;CAMK2A;KCNK7;SLC7A2;LEP;KCNJ2;SLC27A1;SLC38A2
GO:0006941	striated muscle contraction	http://amigo.geneontology.org/amigo/term/GO:0006941	29	9	2.35193	3.82664	0.000316518	0.0107526	396579;396690;396875;397293;414906;100037999;100156435;100188980;100271745	TCAP;TNNT3;TNNT1;TNNC1;MYL2;PGAM2;ATP2A2;TPM1;KCNJ2
GO:0015672	monovalent inorganic cation transport	http://amigo.geneontology.org/amigo/term/GO:0015672	125	22	10.1376	2.17013	0.000355603	0.0119947	396828;396875;396950;397116;397245;397293;492822;574054;733678;100037988;100037990;100134963;100152612;100153669;100154817;100156967;100157406;100157880;100512393;100516480;100626641;100628074	ATP1B4;ACTN2;ATP5MC2;COX7C;ATP2A2;ATP5PO;ATP5MC1;COX5B;ATP5F1A;ENSSSCG00000032129;COX5A;ENSSSCG00000007524;SLC41A1;ATP5PB;ATP5ME;RANGRF;TMEM38B;ATP1A4;PPIF;UCP3;KCNK7;KCNJ2
GO:0006812	cation transport	http://amigo.geneontology.org/amigo/term/GO:0006812	251	36	20.3564	1.76849	0.000406372	0.0136106	396828;396875;396950;397116;397245;397293;397349;397401;492822;574054;733627;733644;733678;100037298;100037988;100037990;100134963;100152612;100153669;100153794;100154817;100154923;100155980;100156967;100157406;100157880;100512393;100514316;100516480;100519779;100525465;100525644;100626014;100626641;100628074;100737924	ATP1B4;SLN;HRC;ACTN2;CAPN3;ATP5MC2;COX7C;ATP2A2;ATP5PO;ATP5MC1;COX5B;ATP5F1A;CACNG6;ENSSSCG00000032129;COX5A;CACNB1;SMDT1;MICU1;ENSSSCG00000007524;SLC41A1;ATP5PB;RAMP1;ATP5ME;RANGRF;RHCG;TMEM38B;MCU;ATP1A4;PPIF;UCP3;ORAI1;CAMK2A;KCNK7;SLC7A2;KCNJ2;SLC38A2
GO:0098660	inorganic ion transmembrane transport	http://amigo.geneontology.org/amigo/term/GO:0098660	179	28	14.5171	1.92876	0.000450368	0.0149787	396828;396875;396950;397116;397293;397349;492822;574054;733678;100037988;100037990;100134963;100152612;100153794;100154817;100154923;100155980;100156967;100157406;100157880;100512393;100514316;100516480;100519779;100525465;100626641;100628074;100737924	HRC;ACTN2;CAPN3;ATP5MC2;COX7C;ATP2A2;ATP5PO;ATP5MC1;COX5B;ATP5F1A;CACNG6;ENSSSCG00000032129;COX5A;CACNB1;SMDT1;MICU1;ENSSSCG00000007524;SLC41A1;ATP5PB;ATP5ME;RANGRF;MCU;ATP1A4;PPIF;UCP3;ORAI1;KCNK7;KCNJ2
GO:0048644	muscle organ morphogenesis	http://amigo.geneontology.org/amigo/term/GO:0048644	19	7	1.54092	4.54273	0.000463586	0.0152912	396690;396959;397005;397689;100152267;100271745;100522496	TCAP;MYF6;XIRP2;ANKRD1;MYOM1;MYL2;ACTC1
GO:0055008	cardiac muscle tissue morphogenesis	http://amigo.geneontology.org/amigo/term/GO:0055008	14	6	1.13542	5.2844	0.000466194	0.0152912	396690;396959;397689;100152267;100271745;100522496	TCAP;XIRP2;ANKRD1;MYOM1;MYL2;ACTC1
GO:0014866	skeletal myofibril assembly	http://amigo.geneontology.org/amigo/term/GO:0014866	6	4	0.486607	8.22018	0.000558907	0.0176037	100152267;100154254;100271745;100522496	TCAP;ENSSSCG00000010190;MYOM1;ACTC1
GO:0006123	mitochondrial electron transport, cytochrome c to oxygen	http://amigo.geneontology.org/amigo/term/GO:0006123	6	4	0.486607	8.22018	0.000558907	0.0176037	492822;100037990;100156967;100170131	COX7C;COX5B;COX5A;CYCS
GO:0019646	aerobic electron transport chain	http://amigo.geneontology.org/amigo/term/GO:0019646	6	4	0.486607	8.22018	0.000558907	0.0176037	492822;100037990;100156967;100170131	COX7C;COX5B;COX5A;CYCS
GO:2001014	regulation of skeletal muscle cell differentiation	http://amigo.geneontology.org/amigo/term/GO:2001014	6	4	0.486607	8.22018	0.000558907	0.0176037	733590;100153818;100153985;100156847	SIX1;SIX4;C7H6orf125;MEF2C
GO:0006122	mitochondrial electron transport, ubiquinol to cytochrome c	http://amigo.geneontology.org/amigo/term/GO:0006122	6	4	0.486607	8.22018	0.000558907	0.0176037	100155687;100170131;100524308;100524873	UQCR10;UQCRQ;CYCS;ENSSSCG00000003903
GO:0006086	acetyl-CoA biosynthetic process from pyruvate	http://amigo.geneontology.org/amigo/term/GO:0006086	6	4	0.486607	8.22018	0.000558907	0.0176037	100154777;100286778;100294678;100516042	PDHA1;MPC2;PDK4;PDHB
GO:0007010	cytoskeleton organization	http://amigo.geneontology.org/amigo/term/GO:0007010	265	37	21.4918	1.72159	0.000575501	0.0180071	396579;396690;396725;396823;396839;396986;397046;397349;397504;397524;397689;414421;414906;497233;733663;100037999;100151861;100151951;100152267;100153985;100154254;100155006;100156549;100157406;100158213;100271745;100513527;100520177;100522496;100523750;100523840;100525195;100621523;100624901;100624986;100628074;106504190	MYPN;TCAP;MYOZ2;XIRP2;LMOD2;TNNT3;TMOD4;FHL3;ENSSSCG00000010190;TNNT1;ACTN2;CAPN3;MYOM1;SMTNL2;MYL2;SIX4;PDLIM3;PRKAA2;AMOT;VCP;CSF3;DES;NEURL1;CFL2;TRIP10;TWF2;RANGRF;TPM1;GAPDH;BCL6;TUBA4A;ACTC1;UBE2B;MYOC;RHOQ;AVIL;PFN2
GO:0060047	heart contraction	http://amigo.geneontology.org/amigo/term/GO:0060047	45	11	3.64955	3.01407	0.000693758	0.0215655	396579;396690;396875;397293;397564;414906;100037999;100152267;100271745;100525465;100628074	TCAP;HRC;TNNT3;TNNT1;MYL2;ATP2A2;HBEGF;RANGRF;TPM1;ACTC1;KCNJ2
GO:0016053	organic acid biosynthetic process	http://amigo.geneontology.org/amigo/term/GO:0016053	91	17	7.38021	2.30346	0.000827441	0.0253891	396823;396967;396968;397149;397504;397602;407608;414426;494561;692156;733601;100153444;100157582;100188980;100286778;100513955;100520636	ENO3;GOT2;PGAM2;ACADVL;TPI1;PRKAA2;PDK4;PRKAG3;PGK1;PFKM;GOT1;GAPDH;PRKAG1;ENSSSCG00000016041;UROS;GPI;HK2
GO:0046394	carboxylic acid biosynthetic process	http://amigo.geneontology.org/amigo/term/GO:0046394	91	17	7.38021	2.30346	0.000827441	0.0253891	396823;396967;396968;397149;397504;397602;407608;414426;494561;692156;733601;100153444;100157582;100188980;100286778;100513955;100520636	ENO3;GOT2;PGAM2;ACADVL;TPI1;PRKAA2;PDK4;PRKAG3;PGK1;PFKM;GOT1;GAPDH;PRKAG1;ENSSSCG00000016041;UROS;GPI;HK2
GO:0009062	fatty acid catabolic process	http://amigo.geneontology.org/amigo/term/GO:0009062	27	8	2.18973	3.65341	0.000967547	0.0294978	396614;396931;397012;397104;397604;100515785;100520636;100626793	ETFDH;ACADM;HADHA;ACADVL;ACAT1;ACADL;HADH;ETFB
GO:0006936	muscle contraction	http://amigo.geneontology.org/amigo/term/GO:0006936	54	12	4.37946	2.74006	0.00100362	0.0304027	396579;396690;396875;397293;414906;100037999;100156435;100157406;100188980;100271745;100522496;100525195	TCAP;LMOD2;TNNT3;TNNT1;ACTN2;MYOM1;TNNC1;MYL2;PGAM2;ATP2A2;TPM1;KCNJ2
GO:0010822	positive regulation of mitochondrion organization	http://amigo.geneontology.org/amigo/term/GO:0010822	16	6	1.29762	4.62385	0.00108095	0.032538	397011;100037982;100038002;100152612;100316852;100627352	ATP5IF1;FAM162A;TOMM7;OPTN;SH3GLB1;PPIF
GO:0140053	mitochondrial gene expression	http://amigo.geneontology.org/amigo/term/GO:0140053	34	9	2.75744	3.2639	0.00115257	0.0344757	654300;100144465;100152325;100152384;100153416;100153818;100522515;100620441;100627457	UQCC1;MTERF3;GFM1;C7H6orf125;QRSL1;ENSSSCG00000010073;TEFM;CHCHD1;MRPS18B
GO:0045663	positive regulation of myoblast differentiation	http://amigo.geneontology.org/amigo/term/GO:0045663	7	4	0.567708	7.04587	0.0012209	0.0362914	397005;407604;733590;100155854	MYOD1;MYF6;HIF1AN;MEF2C
GO:0003015	heart process	http://amigo.geneontology.org/amigo/term/GO:0003015	49	11	3.97396	2.76802	0.00148373	0.0438299	396579;396690;396875;397293;397564;414906;100037999;100152267;100271745;100525465;100628074	TCAP;HRC;TNNT3;TNNT1;MYL2;ATP2A2;HBEGF;RANGRF;TPM1;ACTC1;KCNJ2
GO:0097435	supramolecular fiber organization	http://amigo.geneontology.org/amigo/term/GO:0097435	157	24	12.7329	1.88488	0.00159688	0.0468812	396579;396690;396725;396839;397046;397349;414421;414906;497233;733663;100037999;100151861;100152267;100153985;100154254;100157406;100271745;100512231;100522496;100525195;100621523;100624901;100628074;106504190	MYPN;TCAP;MYOZ2;LMOD2;TNNT3;TMOD4;ENSSSCG00000010190;TNNT1;ACTN2;CAPN3;MYOM1;MYL2;SIX4;PDLIM3;CSF3;DES;CFL2;TWF2;RANGRF;TPM1;ACTC1;MYOC;MFAP5;PFN2
GO:0033866	nucleoside bisphosphate biosynthetic process	http://amigo.geneontology.org/amigo/term/GO:0033866	12	5	0.973214	5.13761	0.00167181	0.0481886	100154777;100286778;100294678;100516042;100626793	PDHA1;MPC2;ACAT1;PDK4;PDHB
GO:0034030	ribonucleoside bisphosphate biosynthetic process	http://amigo.geneontology.org/amigo/term/GO:0034030	12	5	0.973214	5.13761	0.00167181	0.0481886	100154777;100286778;100294678;100516042;100626793	PDHA1;MPC2;ACAT1;PDK4;PDHB
GO:0034033	purine nucleoside bisphosphate biosynthetic process	http://amigo.geneontology.org/amigo/term/GO:0034033	12	5	0.973214	5.13761	0.00167181	0.0481886	100154777;100286778;100294678;100516042;100626793	PDHA1;MPC2;ACAT1;PDK4;PDHB
GO:0008637	apoptotic mitochondrial changes	http://amigo.geneontology.org/amigo/term/GO:0008637	23	7	1.86533	3.75269	0.00169777	0.0486421	100038002;100152612;100316852;100516402;100517196;100626014;100627352	SLC25A4;ATP5IF1;FAM162A;NDUFS1;SH3GLB1;PPIF;CAMK2A
Adipose
geneSet	description	link	size	overlap	expect	enrichmentRatio	pValue	FDR	overlapId	userId
GO:0042221	response to chemical	http://amigo.geneontology.org/amigo/term/GO:0042221	853	92	56.2743	1.63485	1.07527e-07	0.000511401	396593;396653;396670;396775;396832;396886;397011;397018;397020;397036;397077;397096;397127;397155;397157;397307;397311;397360;397400;397407;397433;397479;397490;397537;397557;397560;397568;397671;397683;399533;399537;404694;404697;406188;445465;445539;448982;492313;733607;100126201;100126235;100126284;100135678;100144486;100144492;100152001;100152401;100152846;100153791;100153821;100153822;100154…	ADIPOR2;FABP4;ENSSSCG00000017801;LEP;ACO1;TBL2;AZU1;SCARB1;ARNT;GPX4;KDR;LPL;CAT;NFIL3;DDIT4;ACAA1;VEGFA;NOS3;FBLN5;EIF4EBP2;PAQR9;GPIHBP1;OPTN;ENG;MPC2;GJA5;BCAP31;HYAL2;PTGIS;TCN2;PDE6C;UBXN4;SLC25A17;RGCC;APOD;IL1RAP;NR4A3;PLA2G7;SLPI;VIM;ENSSSCG00000006719;CD63;MGST3;PDK4;GPX8;PCOLCE;SCD;TIMP3;CEBPB;CLEC3B;AQP3;ACKR3;ENSSSCG00000006564;CCN1;TNFRSF1A;NOCT;EGR1;NFKBIA;DUSP10;ESD;GRB10;CEBPA;PPA…
GO:0006629	lipid metabolic process	http://amigo.geneontology.org/amigo/term/GO:0006629	319	44	21.0451	2.09074	1.05553e-06	0.00158993	396593;396670;396733;396801;396832;397018;397020;397036;397048;397082;397307;397407;397479;397537;397583;397604;397671;397678;445539;448982;497624;733607;100126284;100144492;100152320;100153791;100157318;100233202;100286778;100312979;100512363;100512419;100512509;100515451;100515577;100515785;100517713;100519138;100520726;100524902;100622268;100622761;100626793;102166364	ABHD5;RETSAT;LEP;LIPE;LPGAT1;SRD5A2;SCARB1;LPL;THEM5;ACAA1;PIGC;DHRS4;DOLK;PTGIS;ECHDC1;SLC25A17;PTGR1;APOD;NR4A3;PLA2G7;ENSSSCG00000006719;ETFDH;MGST3;HADH;PDK4;SCD;TAMM41;CCN1;TNFRSF1A;EGR1;STARD3;CEBPA;PPARG;CDK4;SOD1;CREM;CLPS;PLPP1;ACAT1;IDH1;LDLR;ENSSSCG00000003839;ACSL1;ENSSSCG00000005518
GO:0045444	fat cell differentiation	http://amigo.geneontology.org/amigo/term/GO:0045444	61	16	4.02431	3.97584	1.12246e-06	0.00158993	396832;397077;397307;397360;397479;397490;397671;399533;595121;100135678;100153765;100316849;100513746;100517416;100525612;100738827	FABP4;LEP;TMEM120B;PDE6C;NR4A3;CEBPB;ARL4A;NOCT;DUSP10;CEBPA;PPARG;MEDAG;ZFP36;FOXO1;NUDT7;INHBB;FFAR4
GO:1901700	response to oxygen-containing compound	http://amigo.geneontology.org/amigo/term/GO:1901700	311	43	20.5174	2.09579	1.3372e-06	0.00158993	396670;396832;396886;397018;397036;397077;397127;397360;397400;397433;397479;397490;397537;397557;397560;397568;397671;404697;406188;445539;492313;100126201;100126235;100144486;100144492;100152001;100153821;100154143;100154777;100155248;100157318;100188977;100286778;100316849;100513746;100515895;100517416;100519976;100520726;100522394;100523197;100523927;100621927	ENSSSCG00000017801;LEP;SCARB1;LPL;CAT;DDIT4;NOS3;FBLN5;EIF4EBP2;GPIHBP1;MPC2;HYAL2;APOD;NR4A3;SLPI;VIM;ENSSSCG00000006719;PDK4;SCD;CEBPB;AQP3;NOCT;EGR1;NFKBIA;DUSP10;ESD;GRB10;PPARG;CDK4;SOD1;PRDX3;THBS1;KCNB1;AGTR1;SIDT2;ZFP36;FOXO1;FOS;INHBB;TGFB3;COL3A1;EDEM2;TSHR
GO:0010033	response to organic substance	http://amigo.geneontology.org/amigo/term/GO:0010033	629	70	41.4965	1.68689	2.22035e-06	0.002112	396670;396775;396832;396886;397011;397018;397020;397036;397077;397096;397127;397155;397157;397307;397311;397360;397400;397433;397479;397490;397537;397557;397560;397671;397683;399533;404694;404697;406188;445465;445539;448982;492313;100126201;100126235;100126284;100144486;100144492;100152001;100153791;100153821;100153822;100154143;100154777;100155929;100156529;100157795;100170854;100188977;10028677…	ADIPOR2;FABP4;ENSSSCG00000017801;LEP;TBL2;SCARB1;KDR;LPL;NFIL3;DDIT4;VEGFA;NOS3;EIF4EBP2;PAQR9;GPIHBP1;OPTN;ENG;MPC2;GJA5;BCAP31;HYAL2;PTGIS;UBXN4;IL1RAP;NR4A3;SLPI;VIM;ENSSSCG00000006719;CD63;PDK4;PCOLCE;SCD;TIMP3;CEBPB;CLEC3B;AQP3;ACKR3;CCN1;TNFRSF1A;NOCT;EGR1;NFKBIA;DUSP10;ESD;GRB10;CEBPA;PPARG;CDK4;SOD1;RAMP2;BUD31;RXRG;PRDX3;THBS1;KCNB1;AGTR1;ATIC;SIDT2;IDH1;ZFP36;FOXO1;FOXRED2;FOS;INHBB;IL1…
GO:0070887	cellular response to chemical stimulus	http://amigo.geneontology.org/amigo/term/GO:0070887	664	72	43.8056	1.64363	4.07473e-06	0.0032299	396593;396653;396775;396832;397011;397018;397020;397036;397077;397096;397127;397155;397157;397307;397311;397360;397400;397433;397479;397490;397560;397568;397671;397683;399533;399537;404694;404697;406188;445465;448982;492313;733607;100126201;100126235;100126284;100144486;100144492;100152001;100152401;100153791;100153821;100153822;100154143;100154707;100154777;100155248;100155281;100155717;10015592…	ADIPOR2;FABP4;ENSSSCG00000017801;LEP;TBL2;AZU1;SCARB1;ARNT;GPX4;KDR;CAT;NFIL3;DDIT4;ACAA1;VEGFA;FBLN5;EIF4EBP2;PAQR9;OPTN;ENG;MPC2;GJA5;HYAL2;PTGIS;RGCC;IL1RAP;NR4A3;PLA2G7;VIM;CD63;MGST3;PDK4;GPX8;PCOLCE;TIMP3;CEBPB;CLEC3B;AQP3;ACKR3;ENSSSCG00000006564;CCN1;TNFRSF1A;EGR1;NFKBIA;ESD;GRB10;CEBPA;PPARG;CDK4;SOD1;RAMP2;BUD31;RXRG;PRDX3;THBS1;KCNB1;AGTR1;ATIC;SIDT2;ZFP36;FOXO1;FOS;PRXL2A;INHBB;IL15;A…
GO:0034440	lipid oxidation	http://amigo.geneontology.org/amigo/term/GO:0034440	29	10	1.91319	5.22686	8.61741e-06	0.00585492	396593;397479;397604;100157318;100286778;100512509;100515577;100515785;100517713;100626793	ACAA1;ECHDC1;SLC25A17;APOD;NR4A3;PLA2G7;ETFDH;HADH;PDK4;ACAT1
GO:0043542	endothelial cell migration	http://amigo.geneontology.org/amigo/term/GO:0043542	49	13	3.23264	4.02148	1.02404e-05	0.00608789	397018;397157;397251;397311;397671;492313;100125345;100152163;100153130;100154707;100157365;100625944;100736572	SCARB1;KDR;STC1;VEGFA;SRPX2;RGCC;FAP;ENSSSCG00000006564;PPARG;CLEC14A;THBS1;DLL4;PLK2
GO:0001568	blood vessel development	http://amigo.geneontology.org/amigo/term/GO:0001568	161	26	10.6215	2.44786	1.31345e-05	0.00694083	396832;397096;397155;397157;397195;397251;397311;397628;397671;404694;406192;414737;492313;100126284;100152001;100152163;100153130;100153791;100153940;100156847;100157365;100157795;100512419;100515346;100520162;100625944	ADIPOR2;LEP;THBS2;KDR;ANGPTL4;VEGFA;SRPX2;ENG;GJA5;PTGIS;SIX1;RGCC;ANXA2;CDH5;ADM;ACKR3;CCN1;PPARG;RAMP2;CLEC14A;HOXA1;THBS1;DLL4;ENSSSCG00000003839;COL3A1;PLK2
GO:0001525	angiogenesis	http://amigo.geneontology.org/amigo/term/GO:0001525	117	21	7.71875	2.72065	1.80521e-05	0.0081294	396832;397096;397155;397157;397195;397251;397311;397628;397671;404694;406192;492313;100126284;100152163;100153130;100153791;100153940;100157365;100157795;100515346;100625944	ADIPOR2;LEP;THBS2;KDR;ANGPTL4;VEGFA;SRPX2;ENG;GJA5;PTGIS;RGCC;ANXA2;ADM;ACKR3;CCN1;PPARG;RAMP2;CLEC14A;THBS1;DLL4;PLK2
GO:0048514	blood vessel morphogenesis	http://amigo.geneontology.org/amigo/term/GO:0048514	145	24	9.56597	2.50889	1.88022e-05	0.0081294	396832;397096;397155;397157;397195;397251;397311;397628;397671;404694;406192;492313;100126284;100152001;100152163;100153130;100153791;100153940;100156847;100157365;100157795;100515346;100520162;100625944	ADIPOR2;LEP;THBS2;KDR;ANGPTL4;VEGFA;SRPX2;ENG;GJA5;PTGIS;SIX1;RGCC;ANXA2;ADM;ACKR3;CCN1;PPARG;RAMP2;CLEC14A;HOXA1;THBS1;DLL4;COL3A1;PLK2
GO:0001944	vasculature development	http://amigo.geneontology.org/amigo/term/GO:0001944	166	26	10.9514	2.37413	2.30168e-05	0.00850186	396832;397096;397155;397157;397195;397251;397311;397628;397671;404694;406192;414737;492313;100126284;100152001;100152163;100153130;100153791;100153940;100156847;100157365;100157795;100512419;100515346;100520162;100625944	ADIPOR2;LEP;THBS2;KDR;ANGPTL4;VEGFA;SRPX2;ENG;GJA5;PTGIS;SIX1;RGCC;ANXA2;CDH5;ADM;ACKR3;CCN1;PPARG;RAMP2;CLEC14A;HOXA1;THBS1;DLL4;ENSSSCG00000003839;COL3A1;PLK2
GO:0043534	blood vessel endothelial cell migration	http://amigo.geneontology.org/amigo/term/GO:0043534	32	10	2.11111	4.73684	2.32389e-05	0.00850186	397018;397157;397251;397311;397671;492313;100152163;100153130;100157365;100625944	SCARB1;KDR;VEGFA;SRPX2;RGCC;PPARG;CLEC14A;THBS1;DLL4;PLK2
GO:0055114	oxidation-reduction process	http://amigo.geneontology.org/amigo/term/GO:0055114	314	40	20.7153	1.93094	2.52879e-05	0.00859066	396593;396670;396832;397036;397040;397048;397082;397339;397479;397538;397557;397568;397573;397604;397678;399537;445539;100037287;100126284;100152785;100154143;100155717;100157318;100286778;100294678;100312964;100512509;100515577;100515785;100517713;100518062;100519138;100519691;100521620;100524271;100624596;100625359;100626793;102161427;102166364	RETSAT;LEP;ENSSSCG00000028513;SRD5A2;GPX4;CAT;ACAA1;ENSSSCG00000006213;NOS3;ENSSSCG00000000576;DHRS4;VAT1;PTGIS;STEAP1;ECHDC1;SLC25A17;PTGR1;APOD;NR4A3;ME1;PLA2G7;ENSSSCG00000006719;DDO;ETFDH;HADH;PDK4;GPX8;SCD;PCYOX1;DHRS7;F8;UGP2;SOD1;PRDX3;ACAT1;IDH1;PRXL2A;PDHA1;PRXL2C;CDO1
GO:0072358	cardiovascular system development	http://amigo.geneontology.org/amigo/term/GO:0072358	168	26	11.0833	2.34586	2.85799e-05	0.00898301	396832;397096;397155;397157;397195;397251;397311;397628;397671;404694;406192;414737;492313;100126284;100152001;100152163;100153130;100153791;100153940;100156847;100157365;100157795;100512419;100515346;100520162;100625944	ADIPOR2;LEP;THBS2;KDR;ANGPTL4;VEGFA;SRPX2;ENG;GJA5;PTGIS;SIX1;RGCC;ANXA2;CDH5;ADM;ACKR3;CCN1;PPARG;RAMP2;CLEC14A;HOXA1;THBS1;DLL4;ENSSSCG00000003839;COL3A1;PLK2
GO:0044255	cellular lipid metabolic process	http://amigo.geneontology.org/amigo/term/GO:0044255	241	33	15.8993	2.07556	3.23462e-05	0.00898301	396593;396670;396733;397018;397020;397082;397479;397537;397583;397604;397671;397678;448982;497624;100126284;100152320;100153791;100157318;100286778;100312979;100512363;100512419;100512509;100515451;100515577;100515785;100517713;100519138;100524902;100622268;100622761;100626793;102166364	ABHD5;RETSAT;LIPE;LPGAT1;SCARB1;LPL;THEM5;ACAA1;PIGC;DHRS4;DOLK;PTGIS;ECHDC1;SLC25A17;PTGR1;APOD;NR4A3;PLA2G7;ETFDH;HADH;PDK4;SCD;TAMM41;CCN1;TNFRSF1A;PPARG;CREM;PLPP1;ACAT1;IDH1;ENSSSCG00000003839;ACSL1;ENSSSCG00000005518
GO:0032787	monocarboxylic acid metabolic process	http://amigo.geneontology.org/amigo/term/GO:0032787	131	22	8.64236	2.5456	3.36797e-05	0.00898301	396670;397020;397479;397538;397604;397671;397678;448982;497624;100126284;100153821;100154777;100286778;100294678;100512509;100515577;100515785;100517713;100524271;100622761;100625406;100626793	ABHD5;LPGAT1;DDIT4;ACAA1;MPC2;PTGIS;ECHDC1;SLC25A17;PTGR1;NR4A3;ME1;ETFDH;HADH;PDK4;SCD;TNFRSF1A;PPARG;ACAT1;PDHA1;ACSL1;PRXL2C;NIT2
GO:0022610	biological adhesion	http://amigo.geneontology.org/amigo/term/GO:0022610	231	32	15.2396	2.09979	3.39979e-05	0.00898301	396832;396941;397018;397046;397096;397111;397157;397311;397360;397479;397528;397683;414737;492313;100152001;100152401;100153130;100153791;100153940;100155660;100155929;100156908;100157318;100511298;100512419;100515975;100517416;100522363;100522817;100625944;100628318;100738241	ZP4;LEP;AZU1;BCAM;THBS2;SCARB1;KDR;MYOC;PECAM1;VEGFA;ESAM;SRPX2;ENG;TFE3;RGCC;APOD;IL1RAP;NR4A3;CDH5;CD63;CEBPB;CD93;CCN1;HOXD3;PEAR1;DUSP10;ENSSSCG00000038594;THBS1;IL15;ENSSSCG00000003839;COL3A1;POSTN
GO:0098754	detoxification	http://amigo.geneontology.org/amigo/term/GO:0098754	41	11	2.70486	4.06675	4.46721e-05	0.0111821	397036;397127;397568;399537;733607;100154143;100155248;100155717;100515577;100519691;100524271	GPX4;CAT;ACAA1;FBLN5;MGST3;GPX8;ESD;SOD1;PRDX3;PRXL2A;PRXL2C
GO:0007155	cell adhesion	http://amigo.geneontology.org/amigo/term/GO:0007155	228	31	15.0417	2.06094	6.57203e-05	0.0156283	396832;396941;397046;397096;397111;397157;397311;397360;397479;397528;397683;414737;492313;100152001;100152401;100153130;100153791;100153940;100155660;100155929;100156908;100157318;100511298;100512419;100515975;100517416;100522363;100522817;100625944;100628318;100738241	ZP4;LEP;AZU1;BCAM;THBS2;KDR;MYOC;PECAM1;VEGFA;ESAM;SRPX2;ENG;TFE3;RGCC;APOD;IL1RAP;NR4A3;CDH5;CD63;CEBPB;CD93;CCN1;HOXD3;PEAR1;DUSP10;ENSSSCG00000038594;THBS1;IL15;ENSSSCG00000003839;COL3A1;POSTN
GO:0009605	response to external stimulus	http://amigo.geneontology.org/amigo/term/GO:0009605	458	51	30.2153	1.68789	7.58094e-05	0.017169	396593;396832;396871;396886;397011;397018;397020;397077;397157;397212;397307;397311;397347;397360;397407;397433;397479;397490;397557;397683;399533;404697;406188;406192;407610;492313;494016;100126235;100126284;100135678;100142677;100144484;100144486;100144492;100152401;100153821;100154143;100154707;100155929;100157318;100157653;100170138;100286778;100316849;100513746;100515346;100517416;100522363;…	FABP4;LEP;TBL2;AZU1;MMP8;SCARB1;KDR;NPG1;NPG1;NPG1;NPG1;DDIT4;VEGFA;SLC22A3;DBI;NOS3;OPTN;HYAL2;PTGIS;PDE6C;ANXA2;APOD;NR4A3;PLA2G7;SLPI;VIM;CD63;PDK4;CEBPB;AQP3;ACKR3;ENSSSCG00000006564;TNFRSF1A;NOCT;NFKBIA;DUSP10;CEBPA;CDK4;PRDX3;CLPS;THBS1;SEMA3G;KCNB1;ZFP36;FOXO1;FOS;INHBB;IL15;CA3;FFAR4;POSTN;ENSSSCG00000024791
GO:0050873	brown fat cell differentiation	http://amigo.geneontology.org/amigo/term/GO:0050873	18	7	1.1875	5.89474	8.51554e-05	0.018409	396832;397307;397360;399533;595121;100517416;100738827	FABP4;LEP;CEBPB;ARL4A;DUSP10;CEBPA;NUDT7
GO:0044281	small molecule metabolic process	http://amigo.geneontology.org/amigo/term/GO:0044281	499	54	32.9201	1.64033	9.85143e-05	0.020371	396635;396670;396801;396963;396978;397018;397020;397036;397040;397048;397127;397307;397479;397538;397557;397583;397604;397671;397678;404697;448982;497624;733607;733667;780412;100037287;100037986;100126284;100153821;100154777;100156015;100157318;100170854;100233202;100286778;100294678;100512509;100515577;100515785;100517713;100518062;100519138;100520726;100524271;100524902;100622268;100622761;1006…	ABHD5;RETSAT;LIPE;ACO1;ENSSSCG00000028513;LPGAT1;MCEE;THTPA;SRD5A2;SCARB1;THEM5;MGAT1;DDIT4;ACAA1;NOS3;ENSSSCG00000000576;MPC2;HYAL2;PTGIS;ECHDC1;SLC25A17;PTGR1;APOD;NR4A3;ME1;DDO;ETFDH;MGST3;HADH;PDK4;SCD;PCYOX1;TAMM41;OXCT1;TNFRSF1A;PGM3;EGR1;STARD3;UGP2;ESD;AK4;CEBPA;PPARG;SOD1;ACAT1;ATIC;IDH1;NUDT7;PDHA1;LDLR;ACSL1;ITIH1;PRXL2C;NIT2
GO:0048646	anatomical structure formation involved in morphogenesis	http://amigo.geneontology.org/amigo/term/GO:0048646	245	32	16.1632	1.97981	0.000109858	0.0216234	396832;397096;397155;397157;397195;397251;397311;397342;397479;397528;397628;397671;404694;406192;414910;492313;100126284;100152163;100153130;100153791;100153940;100156847;100157365;100157795;100515346;100516574;100519805;100520162;100522035;100523811;100624668;100625944	GSC;ADIPOR2;TBC1D20;LEP;THBS2;MMP8;KDR;ANGPTL4;TM4SF1;VEGFA;SRPX2;ENG;GJA5;PTGIS;MEOX1;SIX1;RGCC;ANXA2;NR4A3;ADM;GCM1;ACKR3;CCN1;PPARG;RAMP2;CLEC14A;ENSSSCG00000038594;HOXA1;EHD2;THBS1;DLL4;PLK2
GO:0006631	fatty acid metabolic process	http://amigo.geneontology.org/amigo/term/GO:0006631	86	16	5.67361	2.82007	0.00011862	0.0216234	396670;397020;397479;397604;397671;397678;448982;497624;100126284;100286778;100512509;100515577;100515785;100517713;100622761;100626793	ABHD5;LPGAT1;ACAA1;PTGIS;ECHDC1;SLC25A17;PTGR1;NR4A3;ETFDH;HADH;PDK4;SCD;TNFRSF1A;PPARG;ACAT1;ACSL1
GO:1990748	cellular detoxification	http://amigo.geneontology.org/amigo/term/GO:1990748	38	10	2.50694	3.98892	0.000119464	0.0216234	397036;397127;397568;399537;733607;100154143;100155248;100155717;100519691;100524271	GPX4;CAT;FBLN5;MGST3;GPX8;ESD;SOD1;PRDX3;PRXL2A;PRXL2C
GO:0006637	acyl-CoA metabolic process	http://amigo.geneontology.org/amigo/term/GO:0006637	19	7	1.25347	5.58449	0.000127303	0.0216234	100037986;100154777;100286778;100294678;100622268;100626793;100738827	MCEE;THEM5;MPC2;PDK4;ACAT1;NUDT7;PDHA1
GO:0035383	thioester metabolic process	http://amigo.geneontology.org/amigo/term/GO:0035383	19	7	1.25347	5.58449	0.000127303	0.0216234	100037986;100154777;100286778;100294678;100622268;100626793;100738827	MCEE;THEM5;MPC2;PDK4;ACAT1;NUDT7;PDHA1
GO:0019752	carboxylic acid metabolic process	http://amigo.geneontology.org/amigo/term/GO:0019752	238	31	15.7014	1.97435	0.000149316	0.0244878	396670;396963;397020;397479;397538;397557;397604;397671;397678;404697;448982;497624;733607;100037287;100126284;100153821;100154777;100286778;100294678;100512509;100515577;100515785;100517713;100524271;100622761;100624596;100625406;100626793;100628006;102161427;102166364	ABHD5;ACO1;LPGAT1;DDIT4;ACAA1;NOS3;ENSSSCG00000000576;MPC2;HYAL2;PTGIS;ECHDC1;SLC25A17;PTGR1;NR4A3;ME1;DDO;ETFDH;MGST3;HADH;PDK4;SCD;PCYOX1;TNFRSF1A;PPARG;ACAT1;IDH1;PDHA1;ACSL1;ITIH1;PRXL2C;NIT2
GO:0010631	epithelial cell migration	http://amigo.geneontology.org/amigo/term/GO:0010631	72	14	4.75	2.94737	0.000194902	0.0299017	397018;397157;397251;397311;397671;492313;100125345;100152163;100153130;100154707;100157365;100517416;100625944;100736572	SCARB1;KDR;STC1;VEGFA;SRPX2;RGCC;FAP;ENSSSCG00000006564;DUSP10;PPARG;CLEC14A;THBS1;DLL4;PLK2
GO:0090132	epithelium migration	http://amigo.geneontology.org/amigo/term/GO:0090132	72	14	4.75	2.94737	0.000194902	0.0299017	397018;397157;397251;397311;397671;492313;100125345;100152163;100153130;100154707;100157365;100517416;100625944;100736572	SCARB1;KDR;STC1;VEGFA;SRPX2;RGCC;FAP;ENSSSCG00000006564;DUSP10;PPARG;CLEC14A;THBS1;DLL4;PLK2
GO:0009617	response to bacterium	http://amigo.geneontology.org/amigo/term/GO:0009617	138	21	9.10417	2.30664	0.000220754	0.0305893	396871;396886;397011;397018;397212;397360;397407;397557;399533;406188;407610;494016;100144484;100144492;100154143;100170138;100316849;100513746;100517416;100522363;100522394	FABP4;AZU1;SCARB1;NPG1;NPG1;NPG1;NPG1;DBI;NOS3;OPTN;SLPI;VIM;CEBPB;NOCT;NFKBIA;DUSP10;CDK4;PRDX3;CLPS;ZFP36;CA3
GO:0001667	ameboidal-type cell migration	http://amigo.geneontology.org/amigo/term/GO:0001667	100	17	6.59722	2.57684	0.00023129	0.0305893	397018;397157;397251;397311;397528;397671;404697;492313;100125345;100152163;100153130;100154707;100157365;100157653;100517416;100625944;100736572	SCARB1;KDR;STC1;VEGFA;SRPX2;HYAL2;RGCC;FAP;ENSSSCG00000006564;DUSP10;PPARG;CLEC14A;ENSSSCG00000038594;THBS1;SEMA3G;DLL4;PLK2
GO:0043436	oxoacid metabolic process	http://amigo.geneontology.org/amigo/term/GO:0043436	244	31	16.0972	1.9258	0.000236927	0.0305893	396670;396963;397020;397479;397538;397557;397604;397671;397678;404697;448982;497624;733607;100037287;100126284;100153821;100154777;100286778;100294678;100512509;100515577;100515785;100517713;100524271;100622761;100624596;100625406;100626793;100628006;102161427;102166364	ABHD5;ACO1;LPGAT1;DDIT4;ACAA1;NOS3;ENSSSCG00000000576;MPC2;HYAL2;PTGIS;ECHDC1;SLC25A17;PTGR1;NR4A3;ME1;DDO;ETFDH;MGST3;HADH;PDK4;SCD;PCYOX1;TNFRSF1A;PPARG;ACAT1;IDH1;PDHA1;ACSL1;ITIH1;PRXL2C;NIT2
GO:0043535	regulation of blood vessel endothelial cell migration	http://amigo.geneontology.org/amigo/term/GO:0043535	27	8	1.78125	4.49123	0.000237974	0.0305893	397157;397251;397311;397671;492313;100152163;100153130;100625944	KDR;VEGFA;SRPX2;RGCC;PPARG;THBS1;DLL4;PLK2
GO:0019395	fatty acid oxidation	http://amigo.geneontology.org/amigo/term/GO:0019395	27	8	1.78125	4.49123	0.000237974	0.0305893	397479;397604;100286778;100512509;100515577;100515785;100517713;100626793	ACAA1;ECHDC1;SLC25A17;NR4A3;ETFDH;HADH;PDK4;ACAT1
GO:1901568	fatty acid derivative metabolic process	http://amigo.geneontology.org/amigo/term/GO:1901568	27	8	1.78125	4.49123	0.000237974	0.0305893	396978;397020;397671;397678;733607;100126284;100622268;100626793	THEM5;PTGIS;PTGR1;MGST3;OXCT1;TNFRSF1A;PPARG;ACAT1
GO:0045598	regulation of fat cell differentiation	http://amigo.geneontology.org/amigo/term/GO:0045598	34	9	2.24306	4.01238	0.000250661	0.0313723	396832;397077;397307;397360;397671;100153765;100316849;100513746;100517416	LEP;CEBPB;NOCT;DUSP10;CEBPA;PPARG;MEDAG;ZFP36;FOXO1
GO:0051239	regulation of multicellular organismal process	http://amigo.geneontology.org/amigo/term/GO:0051239	647	64	42.684	1.49939	0.000298802	0.0363305	396653;396811;396832;396915;397036;397155;397157;397195;397206;397251;397307;397311;397360;397400;397479;397490;397604;397671;397683;399533;404694;404697;406188;406192;414910;448982;492313;493185;100125345;100126284;100135678;100144486;100144492;100152001;100152163;100153130;100153791;100153940;100155281;100155717;100156847;100157318;100157653;100157795;100188977;100286778;100316849;100511298;100…	ADIPOR2;FABP4;LEP;AZU1;THBS2;MMP8;TCIM;ARNT;KDR;STC1;VEGFA;SRPX2;GJA5;HYAL2;PTGIS;SIX1;PDE6C;TFE3;RGCC;ANXA2;APOD;IL1RAP;NR4A3;VIM;ADM;LRRC17;GCM1;HADH;PDK4;ANXA5;CEBPB;CCN1;NOCT;EGR1;HOXD3;NFKBIA;EDN1;DUSP10;GRB10;ENSSSCG00000028635;CEBPA;PPARG;CDK4;SOD1;RAMP2;IFRD1;THBS1;SEMA3G;DLL4;AGTR1;EFEMP1;ZFP36;FOS;PRXL2A;INHBB;IL15;ADRA1B;MGP;PTGER3;ACSL1;TGFB3;COL3A1;FFAR4;PLK2;FBXO7
GO:0090130	tissue migration	http://amigo.geneontology.org/amigo/term/GO:0090130	75	14	4.94792	2.82947	0.000305555	0.0363305	397018;397157;397251;397311;397671;492313;100125345;100152163;100153130;100154707;100157365;100517416;100625944;100736572	SCARB1;KDR;STC1;VEGFA;SRPX2;RGCC;FAP;ENSSSCG00000006564;DUSP10;PPARG;CLEC14A;THBS1;DLL4;PLK2
GO:0006082	organic acid metabolic process	http://amigo.geneontology.org/amigo/term/GO:0006082	249	31	16.4271	1.88713	0.000342398	0.039292	396670;396963;397020;397479;397538;397557;397604;397671;397678;404697;448982;497624;733607;100037287;100126284;100153821;100154777;100286778;100294678;100512509;100515577;100515785;100517713;100524271;100622761;100624596;100625406;100626793;100628006;102161427;102166364	ABHD5;ACO1;LPGAT1;DDIT4;ACAA1;NOS3;ENSSSCG00000000576;MPC2;HYAL2;PTGIS;ECHDC1;SLC25A17;PTGR1;NR4A3;ME1;DDO;ETFDH;MGST3;HADH;PDK4;SCD;PCYOX1;TNFRSF1A;PPARG;ACAT1;IDH1;PDHA1;ACSL1;ITIH1;PRXL2C;NIT2
GO:0050727	regulation of inflammatory response	http://amigo.geneontology.org/amigo/term/GO:0050727	76	14	5.01389	2.79224	0.000352793	0.039292	396832;397020;397307;397347;397360;399533;404697;406188;100126284;100135678;100157318;100316849;100517416;100523811	FABP4;LEP;MMP8;HYAL2;PTGIS;PDE6C;APOD;CEBPB;TNFRSF1A;NFKBIA;DUSP10;CEBPA;ZFP36;FFAR4;ENSSSCG00000024791
GO:0002042	cell migration involved in sprouting angiogenesis	http://amigo.geneontology.org/amigo/term/GO:0002042	16	6	1.05556	5.68421	0.000355248	0.039292	397157;397251;397311;492313;100153130;100157365	KDR;VEGFA;SRPX2;CLEC14A;THBS1;PLK2
GO:0098869	cellular oxidant detoxification	http://amigo.geneontology.org/amigo/term/GO:0098869	36	9	2.375	3.78947	0.000400249	0.0432633	397036;397568;399537;733607;100154143;100155248;100155717;100519691;100524271	GPX4;CAT;FBLN5;MGST3;GPX8;SOD1;PRDX3;PRXL2A;PRXL2C
GO:0016042	lipid catabolic process	http://amigo.geneontology.org/amigo/term/GO:0016042	78	14	5.14583	2.72065	0.000466251	0.0492776	396593;397018;397407;397537;397583;397604;497624;100144492;100512509;100515577;100515785;100517713;100626793;102166364	ABHD5;LIPE;SCARB1;LPL;ACAA1;ECHDC1;SLC25A17;PLA2G7;ETFDH;HADH;CDK4;CLPS;ACAT1;IDH1
Cortex
geneSet	description	link	size	overlap	expect	enrichmentRatio	pValue	FDR	overlapId	userId
GO:0007268	chemical synaptic transmission	http://amigo.geneontology.org/amigo/term/GO:0007268	91	17	2.23438	7.60839	2.78111e-11	4.77156e-08	396562;397257;414283;414284;100127148;100144498;100154741;100155948;100156610;100216310;100512029;100514772;100515106;100516405;100516491;100520472;100626046	GABRG2;SV2A;GABRA5;GFAP;CHRNB2;SLC17A7;NRN1;RAB3A;SYP;CBLN1;PNOC;SYN1;NAPB;GLRB;ADCYAP1;SYNGR1;SYT11
GO:0098916	anterograde trans-synaptic signaling	http://amigo.geneontology.org/amigo/term/GO:0098916	91	17	2.23438	7.60839	2.78111e-11	4.77156e-08	396562;397257;414283;414284;100127148;100144498;100154741;100155948;100156610;100216310;100512029;100514772;100515106;100516405;100516491;100520472;100626046	GABRG2;SV2A;GABRA5;GFAP;CHRNB2;SLC17A7;NRN1;RAB3A;SYP;CBLN1;PNOC;SYN1;NAPB;GLRB;ADCYAP1;SYNGR1;SYT11
GO:0099537	trans-synaptic signaling	http://amigo.geneontology.org/amigo/term/GO:0099537	92	17	2.25893	7.52569	3.34486e-11	4.77156e-08	396562;397257;414283;414284;100127148;100144498;100154741;100155948;100156610;100216310;100512029;100514772;100515106;100516405;100516491;100520472;100626046	GABRG2;SV2A;GABRA5;GFAP;CHRNB2;SLC17A7;NRN1;RAB3A;SYP;CBLN1;PNOC;SYN1;NAPB;GLRB;ADCYAP1;SYNGR1;SYT11
GO:0099536	synaptic signaling	http://amigo.geneontology.org/amigo/term/GO:0099536	93	17	2.28348	7.44477	4.01309e-11	4.77156e-08	396562;397257;414283;414284;100127148;100144498;100154741;100155948;100156610;100216310;100512029;100514772;100515106;100516405;100516491;100520472;100626046	GABRG2;SV2A;GABRA5;GFAP;CHRNB2;SLC17A7;NRN1;RAB3A;SYP;CBLN1;PNOC;SYN1;NAPB;GLRB;ADCYAP1;SYNGR1;SYT11
GO:0060078	regulation of postsynaptic membrane potential	http://amigo.geneontology.org/amigo/term/GO:0060078	14	8	0.34375	23.2727	2.64561e-10	2.51651e-07	414283;414284;100127148;100514772;100516405;100516491;100517063;100520472	GABRG2;GABRA5;CHRNB2;SLC17A7;CBLN1;GABRB2;GLRB;ADCYAP1
GO:0006836	neurotransmitter transport	http://amigo.geneontology.org/amigo/term/GO:0006836	49	12	1.20312	9.97403	1.06465e-09	8.4391e-07	396562;414283;100144498;100154741;100155948;100156610;100216310;100512029;100514772;100515106;100516491;100518296	SV2A;SLC1A6;GFAP;CHRNB2;SLC17A7;NRN1;RAB3A;SYP;SYN1;NAPB;ADCYAP1;SYT11
GO:0042391	regulation of membrane potential	http://amigo.geneontology.org/amigo/term/GO:0042391	68	13	1.66964	7.7861	5.46817e-09	3.71523e-06	414283;414284;100037948;100127148;100514772;100516405;100516491;100517063;100517764;100518296;100520242;100520472;100622822	GABRG2;GABRA5;SLC1A6;CHRNB2;SLC17A7;CBLN1;KCNIP2;SLC26A4;GABRB2;GLRB;ADCYAP1;MLLT11;SLC25A33
GO:0001505	regulation of neurotransmitter levels	http://amigo.geneontology.org/amigo/term/GO:0001505	71	13	1.7433	7.45711	9.53302e-09	5.66738e-06	396562;396928;396929;396965;100144498;100154741;100155948;100156610;100216310;100512029;100514772;100515106;100516491	GAD1;SV2A;GAD2;GFAP;CHRNB2;SLC17A7;NRN1;RAB3A;SYP;SYN1;NAPB;PRL;SYT11
GO:0097479	synaptic vesicle localization	http://amigo.geneontology.org/amigo/term/GO:0097479	32	9	0.785714	11.4545	3.9535e-08	1.88028e-05	100144498;100154741;100155948;100156610;100216310;100512029;100515106;100516491;100622102	SV2A;CHRNB2;NRN1;RAB3A;SYP;KIF5C;SYN1;NAPB;SYT11
GO:0099504	synaptic vesicle cycle	http://amigo.geneontology.org/amigo/term/GO:0099504	32	9	0.785714	11.4545	3.9535e-08	1.88028e-05	100144498;100154741;100155948;100156610;100216310;100512029;100514772;100515106;100516491	SV2A;CHRNB2;SLC17A7;NRN1;RAB3A;SYP;SYN1;NAPB;SYT11
GO:0030182	neuron differentiation	http://amigo.geneontology.org/amigo/term/GO:0030182	226	21	5.54911	3.78439	6.79393e-08	2.93745e-05	396562;396876;397029;414283;100037948;100127148;100144498;100152482;100152591;100155948;100158146;100516491;100517063;100520472;100525125;100525161;100620095;100622102;100623423;100625457;100626830	OLIG1;GABRA5;GFAP;PLPPR4;PLP1;CHRNB2;GAP43;OMG;CPNE5;OLIG2;NRN1;RAB3A;KIF5C;CBLN1;CEND1;KCNIP2;RND2;ATCAY;GABRB2;ADCYAP1;VXN
GO:0007269	neurotransmitter secretion	http://amigo.geneontology.org/amigo/term/GO:0007269	26	8	0.638393	12.5315	1.07882e-07	3.94683e-05	100144498;100154741;100155948;100156610;100216310;100512029;100515106;100516491	SV2A;CHRNB2;NRN1;RAB3A;SYP;SYN1;NAPB;SYT11
GO:0099643	signal release from synapse	http://amigo.geneontology.org/amigo/term/GO:0099643	26	8	0.638393	12.5315	1.07882e-07	3.94683e-05	100144498;100154741;100155948;100156610;100216310;100512029;100515106;100516491	SV2A;CHRNB2;NRN1;RAB3A;SYP;SYN1;NAPB;SYT11
GO:0007399	nervous system development	http://amigo.geneontology.org/amigo/term/GO:0007399	373	27	9.15848	2.94809	1.32423e-07	4.37884e-05	396562;396876;397029;414283;414284;100037948;100127148;100144498;100152482;100152591;100153400;100154240;100155948;100156844;100158146;100514647;100516491;100517063;100520472;100522126;100525125;100525161;100620095;100622102;100623423;100625457;100626830	LRTM2;OLIG1;GABRA5;GFAP;PLPPR4;PLP1;CHRNB2;GAP43;OMG;CPNE5;OLIG2;NRN1;RAB3A;KIF5C;CBLN1;CEND1;KCNIP2;RND2;ENSSSCG00000014272;NRSN1;ATCAY;GABRB2;GLRB;ADCYAP1;VXN;FGF14;INA
GO:0048699	generation of neurons	http://amigo.geneontology.org/amigo/term/GO:0048699	257	22	6.31027	3.48638	1.38105e-07	4.37884e-05	396562;396876;397029;414283;100037948;100127148;100144498;100152482;100152591;100155948;100158146;100516491;100517063;100520472;100522126;100525125;100525161;100620095;100622102;100623423;100625457;100626830	OLIG1;GABRA5;GFAP;PLPPR4;PLP1;CHRNB2;GAP43;OMG;CPNE5;OLIG2;NRN1;RAB3A;KIF5C;CBLN1;CEND1;KCNIP2;RND2;ENSSSCG00000014272;ATCAY;GABRB2;ADCYAP1;VXN
GO:1902476	chloride transmembrane transport	http://amigo.geneontology.org/amigo/term/GO:1902476	14	6	0.34375	17.4545	4.82362e-07	0.000123206	414284;100514772;100516405;100520472;100524682;100622822	GABRG2;GABRA5;TTYH1;SLC17A7;SLC26A4;GLRB
GO:0022008	neurogenesis	http://amigo.geneontology.org/amigo/term/GO:0022008	276	22	6.77679	3.24638	4.89219e-07	0.000123206	396562;396876;397029;414283;100037948;100127148;100144498;100152482;100152591;100155948;100158146;100516491;100517063;100520472;100522126;100525125;100525161;100620095;100622102;100623423;100625457;100626830	OLIG1;GABRA5;GFAP;PLPPR4;PLP1;CHRNB2;GAP43;OMG;CPNE5;OLIG2;NRN1;RAB3A;KIF5C;CBLN1;CEND1;KCNIP2;RND2;ENSSSCG00000014272;ATCAY;GABRB2;ADCYAP1;VXN
GO:0048489	synaptic vesicle transport	http://amigo.geneontology.org/amigo/term/GO:0048489	31	8	0.761161	10.5103	4.92201e-07	0.000123206	100144498;100154741;100155948;100156610;100512029;100515106;100516491;100622102	SV2A;CHRNB2;NRN1;RAB3A;SYP;KIF5C;NAPB;SYT11
GO:0097480	establishment of synaptic vesicle localization	http://amigo.geneontology.org/amigo/term/GO:0097480	31	8	0.761161	10.5103	4.92201e-07	0.000123206	100144498;100154741;100155948;100156610;100512029;100515106;100516491;100622102	SV2A;CHRNB2;NRN1;RAB3A;SYP;KIF5C;NAPB;SYT11
GO:0007267	cell-cell signaling	http://amigo.geneontology.org/amigo/term/GO:0007267	239	20	5.8683	3.40814	8.25452e-07	0.000196292	396562;397257;403331;414283;414284;100127148;100127357;100144498;100154741;100155948;100156610;100216310;100512029;100512827;100514772;100515106;100516405;100516491;100520472;100626046	CYP19A1;GABRG2;SV2A;GABRA5;GFAP;CHRNB2;SLC17A7;NRN1;RAB3A;SYP;CBLN1;PNOC;PIN1;SYN1;NAPB;NDP;GLRB;ADCYAP1;SYNGR1;SYT11
GO:0016079	synaptic vesicle exocytosis	http://amigo.geneontology.org/amigo/term/GO:0016079	24	7	0.589286	11.8788	1.06916e-06	0.000242139	100144498;100154741;100155948;100156610;100512029;100515106;100516491	SV2A;CHRNB2;NRN1;RAB3A;SYP;NAPB;SYT11
GO:0098661	inorganic anion transmembrane transport	http://amigo.geneontology.org/amigo/term/GO:0098661	16	6	0.392857	15.2727	1.23596e-06	0.000267191	414284;100514772;100516405;100520472;100524682;100622822	GABRG2;GABRA5;TTYH1;SLC17A7;SLC26A4;GLRB
GO:0006821	chloride transport	http://amigo.geneontology.org/amigo/term/GO:0006821	17	6	0.417411	14.3743	1.87238e-06	0.000387175	414284;100514772;100516405;100520472;100524682;100622822	GABRG2;GABRA5;TTYH1;SLC17A7;SLC26A4;GLRB
GO:0099003	vesicle-mediated transport in synapse	http://amigo.geneontology.org/amigo/term/GO:0099003	37	8	0.908482	8.8059	2.13287e-06	0.000422663	100144498;100154741;100155948;100156610;100512029;100515106;100516491;100622102	SV2A;CHRNB2;NRN1;RAB3A;SYP;KIF5C;NAPB;SYT11
GO:0051648	vesicle localization	http://amigo.geneontology.org/amigo/term/GO:0051648	50	9	1.22768	7.33091	2.44863e-06	0.000465828	100144498;100154741;100155948;100156610;100216310;100512029;100515106;100516491;100622102	SV2A;CHRNB2;NRN1;RAB3A;SYP;KIF5C;SYN1;NAPB;SYT11
GO:0098693	regulation of synaptic vesicle cycle	http://amigo.geneontology.org/amigo/term/GO:0098693	18	6	0.441964	13.5758	2.75309e-06	0.000503603	100144498;100155948;100216310;100512029;100515106;100516491	CHRNB2;NRN1;RAB3A;SYP;SYN1;NAPB
GO:0015698	inorganic anion transport	http://amigo.geneontology.org/amigo/term/GO:0015698	28	7	0.6875	10.1818	3.37429e-06	0.000594375	397223;414284;100514772;100516405;100520472;100524682;100622822	GABRG2;SLC22A6;GABRA5;TTYH1;SLC17A7;SLC26A4;GLRB
GO:0048666	neuron development	http://amigo.geneontology.org/amigo/term/GO:0048666	178	16	4.37054	3.66088	4.82139e-06	0.000818948	396562;397029;414283;100037948;100144498;100152591;100155948;100158146;100516491;100517063;100520472;100525125;100622102;100623423;100625457;100626830	GABRA5;GFAP;PLPPR4;PLP1;CHRNB2;GAP43;OMG;CPNE5;NRN1;RAB3A;KIF5C;KCNIP2;RND2;ATCAY;GABRB2;ADCYAP1
GO:0017156	calcium ion regulated exocytosis	http://amigo.geneontology.org/amigo/term/GO:0017156	30	7	0.736607	9.50303	5.57248e-06	0.000913886	100144498;100154741;100155948;100156610;100512029;100515106;100516491	SV2A;CHRNB2;NRN1;RAB3A;SYP;NAPB;SYT11
GO:0055085	transmembrane transport	http://amigo.geneontology.org/amigo/term/GO:0055085	345	23	8.47098	2.71515	5.97474e-06	0.000943207	397223;397472;407774;414284;100037948;100152358;100152841;100155276;100156610;100156844;100514772;100516405;100516491;100517063;100517764;100518296;100520472;100522066;100523018;100524682;100525049;100620758;100622822	CACNG3;GABRG2;ATP6V1G2-DDX39B;SLC22A6;SV2A;GABRA5;SLC1A6;CHRNB2;TTYH1;SLC17A7;KCNIP2;SLC26A4;ATP6V1H;GABRB2;GLRB;FGF14;SLC22A17;SLC7A10;ATP6V0A1;SLC22A8;KCND1;KCNK10;SLC25A33
GO:0065008	regulation of biological quality	http://amigo.geneontology.org/amigo/term/GO:0065008	875	41	21.4844	1.90836	6.1479e-06	0.000943207	396562;396573;396574;396928;396929;396965;397428;397638;403331;414283;414284;445533;100037948;100127148;100144498;100153407;100154741;100155948;100156610;100216310;100512029;100512827;100514647;100514772;100515106;100516405;100516491;100517063;100517233;100517764;100518296;100520175;100520242;100520472;100522066;100523018;100622822;100623981;100625457;100626046;100627261	ENSSSCG00000013387;CYP19A1;CACNG3;LRTM2;GAD1;GABRG2;HCRTR2;SV2A;GABRA5;SLC1A6;GAD2;GFAP;CHRNB2;CAMKV;VSTM2A;SLC17A7;ERMN;CALCR;ENSSSCG00000013386;NRN1;RAB3A;SYP;CBLN1;KCNIP2;SLC26A4;RND2;PIN1;SYN1;NAPB;PRL;PCSK2;TMX2;GABRB2;GLRB;ADCYAP1;SYNGR1;ATP6V0A1;CSDC2;MLLT11;SLC25A33;SYT11
GO:0034220	ion transmembrane transport	http://amigo.geneontology.org/amigo/term/GO:0034220	231	18	5.67188	3.17355	8.87498e-06	0.00131904	397472;414284;100037948;100152358;100155276;100156844;100514772;100516405;100516491;100517063;100518296;100520472;100522066;100523018;100524682;100525049;100620758;100622822	CACNG3;GABRG2;ATP6V1G2-DDX39B;GABRA5;SLC1A6;CHRNB2;TTYH1;SLC17A7;KCNIP2;SLC26A4;ATP6V1H;GABRB2;GLRB;FGF14;SLC7A10;ATP6V0A1;KCND1;KCNK10
GO:0098656	anion transmembrane transport	http://amigo.geneontology.org/amigo/term/GO:0098656	45	8	1.10491	7.2404	1.01253e-05	0.00138964	414284;100514772;100516405;100518296;100520472;100524682;100525049;100622822	GABRG2;GABRA5;SLC1A6;TTYH1;SLC17A7;SLC26A4;GLRB;SLC7A10
GO:0050804	modulation of chemical synaptic transmission	http://amigo.geneontology.org/amigo/term/GO:0050804	59	9	1.44866	6.21263	1.02265e-05	0.00138964	396562;414283;100127148;100144498;100155948;100512029;100515106;100516491;100626046	GFAP;CHRNB2;NRN1;RAB3A;SYP;CBLN1;NAPB;ADCYAP1;SYNGR1
GO:0099177	regulation of trans-synaptic signaling	http://amigo.geneontology.org/amigo/term/GO:0099177	59	9	1.44866	6.21263	1.02265e-05	0.00138964	396562;414283;100127148;100144498;100155948;100512029;100515106;100516491;100626046	GFAP;CHRNB2;NRN1;RAB3A;SYP;CBLN1;NAPB;ADCYAP1;SYNGR1
GO:0051588	regulation of neurotransmitter transport	http://amigo.geneontology.org/amigo/term/GO:0051588	23	6	0.564732	10.6245	1.35503e-05	0.00179014	396562;100144498;100155948;100512029;100515106;100516491	GFAP;CHRNB2;NRN1;RAB3A;SYP;NAPB
GO:0007186	G protein-coupled receptor signaling pathway	http://amigo.geneontology.org/amigo/term/GO:0007186	176	15	4.32143	3.47107	1.89328e-05	0.00231177	396573;396574;397257;397428;397638;414283;414284;100516405;100517063;100517153;100520472;100523039;100620948;100623553;102162410	ENSSSCG00000013387;GABRG2;HCRTR2;GABRA5;CALCR;ENSSSCG00000013386;PNOC;ENSSSCG00000032197;GPR17;GPR75;GABRB2;GLRB;RGS8;ADCYAP1;GPRASP1
GO:0051650	establishment of vesicle localization	http://amigo.geneontology.org/amigo/term/GO:0051650	49	8	1.20312	6.64935	1.95347e-05	0.00231177	100144498;100154741;100155948;100156610;100512029;100515106;100516491;100622102	SV2A;CHRNB2;NRN1;RAB3A;SYP;KIF5C;NAPB;SYT11
GO:0046928	regulation of neurotransmitter secretion	http://amigo.geneontology.org/amigo/term/GO:0046928	15	5	0.368304	13.5758	1.99291e-05	0.00231177	100144498;100155948;100512029;100515106;100516491	CHRNB2;NRN1;RAB3A;SYP;NAPB
GO:1902803	regulation of synaptic vesicle transport	http://amigo.geneontology.org/amigo/term/GO:1902803	15	5	0.368304	13.5758	1.99291e-05	0.00231177	100144498;100155948;100512029;100515106;100516491	CHRNB2;NRN1;RAB3A;SYP;NAPB
GO:2000300	regulation of synaptic vesicle exocytosis	http://amigo.geneontology.org/amigo/term/GO:2000300	15	5	0.368304	13.5758	1.99291e-05	0.00231177	100144498;100155948;100512029;100515106;100516491	CHRNB2;NRN1;RAB3A;SYP;NAPB
GO:0060079	excitatory postsynaptic potential	http://amigo.geneontology.org/amigo/term/GO:0060079	8	4	0.196429	20.3636	2.22078e-05	0.00245629	414284;100127148;100514772;100516491	CHRNB2;SLC17A7;CBLN1;GLRB
GO:0099565	chemical synaptic transmission, postsynaptic	http://amigo.geneontology.org/amigo/term/GO:0099565	8	4	0.196429	20.3636	2.22078e-05	0.00245629	414284;100127148;100514772;100516491	CHRNB2;SLC17A7;CBLN1;GLRB
GO:0006811	ion transport	http://amigo.geneontology.org/amigo/term/GO:0006811	359	22	8.81473	2.49582	3.81486e-05	0.00412351	397223;397472;407774;414283;414284;100037948;100152358;100154741;100155276;100156844;100514772;100516405;100516491;100517063;100518296;100520472;100522066;100523018;100524682;100525049;100620758;100622822	CACNG3;GABRG2;ATP6V1G2-DDX39B;SLC22A6;GABRA5;SLC1A6;CHRNB2;TTYH1;SLC17A7;KCNIP2;SLC26A4;ATP6V1H;GABRB2;GLRB;ADCYAP1;FGF14;SLC7A10;ATP6V0A1;SLC22A8;KCND1;KCNK10;SYT11
GO:0023061	signal release	http://amigo.geneontology.org/amigo/term/GO:0023061	91	10	2.23438	4.47552	6.22239e-05	0.00657637	403331;414283;100144498;100154741;100155948;100156610;100216310;100512029;100515106;100516491	CYP19A1;SV2A;CHRNB2;NRN1;RAB3A;SYP;SYN1;NAPB;ADCYAP1;SYT11
GO:0031175	neuron projection development	http://amigo.geneontology.org/amigo/term/GO:0031175	155	13	3.8058	3.41584	8.51272e-05	0.00880141	396562;397029;414283;100144498;100152591;100155948;100158146;100516491;100525125;100622102;100623423;100625457;100626830	GFAP;PLPPR4;PLP1;CHRNB2;GAP43;OMG;CPNE5;NRN1;RAB3A;KIF5C;RND2;ATCAY;ADCYAP1
GO:0098660	inorganic ion transmembrane transport	http://amigo.geneontology.org/amigo/term/GO:0098660	179	14	4.39509	3.18537	9.58149e-05	0.00969566	397472;414284;100037948;100152358;100155276;100156844;100514772;100516405;100520472;100522066;100523018;100524682;100620758;100622822	CACNG3;GABRG2;ATP6V1G2-DDX39B;GABRA5;TTYH1;SLC17A7;KCNIP2;SLC26A4;ATP6V1H;GLRB;FGF14;ATP6V0A1;KCND1;KCNK10
GO:0017158	regulation of calcium ion-dependent exocytosis	http://amigo.geneontology.org/amigo/term/GO:0017158	21	5	0.515625	9.69697	0.000120096	0.0118995	100144498;100155948;100512029;100515106;100516491	CHRNB2;NRN1;RAB3A;SYP;NAPB
GO:0035249	synaptic transmission, glutamatergic	http://amigo.geneontology.org/amigo/term/GO:0035249	5	3	0.122768	24.4364	0.000138593	0.013452	414283;100514772;100515106	SLC17A7;NAPB;ADCYAP1
GO:0006835	dicarboxylic acid transport	http://amigo.geneontology.org/amigo/term/GO:0006835	13	4	0.319196	12.5315	0.000206302	0.0196235	397223;100514772;100518296;100622822	SLC22A6;SLC1A6;SLC17A7;SLC26A4
GO:0045055	regulated exocytosis	http://amigo.geneontology.org/amigo/term/GO:0045055	53	7	1.30134	5.37907	0.000265665	0.0247746	100144498;100154741;100155948;100156610;100512029;100515106;100516491	SV2A;CHRNB2;NRN1;RAB3A;SYP;NAPB;SYT11
[truncated: 149 more rows]

## Sheet: Table S5 TSR_go_enhancer
Table S5 Gene Ontology of putative targeted genes of tissue-specific EnhAs
Term ID	# Term Name	Go	All_common	Gut_common	Jejunum	Duodenum	Ileum	Colon	Cecum	Stomach	Liver	Spleen	Lung	Muscle	Adipose	Cortex	Cerebellum	Hypothalamus	Brain_common
[truncated: 1,118 more rows]

## Sheet: Table S6 TSR_go_promoter
Table S6 Gene Ontology of putative targeted genes of tissue-specific TssAs
[truncated: 919 more rows]

[truncated: 8 more sheets: Table S7 human_phenotype, Table S7 Human-specific TssA, Table S8 Selection_signature, Table S9 Pig_GWAS, Table S10 human_data, Table S11 Mouse_data, Table S12 Human_GWAS, Table S13  LDSC regression]
